# Supplementary material for: Pd-catalysed general access to 7-membered N/O-heterocyclic compounds as potential agents against inflammation
Source: Royal Society of Chemistry journal article supplement (doi:10.1039/d1cc04140a), 2021-01-01
Supplement: d1cc04140a1.xlsx [file d1cc04140a1.xlsx]

## Sheet: Sheet1
CONCENTRATION(µM)	Structure	% PDE4B INHIBITION 1ST	% PDE4B INHIBITION 2ND	% PDE4B INHIBITION (AVG)	STD
roflu(10nM)		69.3311	65.0889	67.21	2.99965
roflu(3nM)		53.1258	33.1653	43.1455	14.1142
4h(30μM)		80.0379	71.9474	75.9927	5.72087
4h(10μM)		63.9418	56.4215	60.1816	5.31768
4h(3μM)		35.0488	33.998	34.5234	0.743026
4h(1μM)		20.5152	10.8818	15.6985	6.81187
4h(0.3μM)		10.6679	5.79777	8.23282	3.44368
4h(0.1μM)		14.4351	12.3051	13.3701	1.50618
4h(0.03μM)		23.2848	11.2601	17.2725	8.5027
4h(0.01μM)		17.941	13.7913	15.8661	2.93426
4h(0.003μM)		24.1866	11.7781	17.9824	8.77417
4h(0.001μM)		21.4499	24.8756	23.1628	2.42234
