# Supplementary material for: Pd-catalysed general access to 7-membered N/O-heterocyclic compounds as potential agents against inflammation
Source: Royal Society of Chemistry journal article supplement (doi:10.1039/d1cc04140a), 2021-01-01
Supplement: d1cc04140a2.xlsx [file d1cc04140a2.xlsx]

## Sheet: Sheet1
CONCENTRATION(µM)	STRUCTURE	% PDE4B INHIBITION 1ST	% PDE4B INHIBITION 2ND	% PDE4B INHIBITION (AVG)	STD
roflu(10nM)		76.6734	83.0783	79.8758	4.52894
roflu(3nM)		54.6247	62.0268	58.3258	5.23408
4n(30μM)		74.1331	70.6057	72.3694	2.49428
4n(10μM)		51.404	52.6676	52.0358	0.893504
4n(3μM)		19.7142	25.3191	22.5167	3.96323
4n(1μM)		10.2747	19.8905	15.0826	6.79939
4n(0.3μM)		11.583	18.1228	14.8529	4.62435
4n(0.1μM)		11.8775	18.1461	15.0118	4.43256
4n(0.03μM)		8.3853	19.8257	14.1055	8.08959
4n(0.01μM)		16.4775	32.1281	24.3028	11.0667
4n(0.003μM)		19.399	27.4336	23.4163	5.68125
4n(0.001μM)		17.2151	16.2476	16.7314	0.684142
