# Supplementary material for: Pd-catalysed general access to 7-membered N/O-heterocyclic compounds as potential agents against inflammation
Source: Royal Society of Chemistry journal article supplement (doi:10.1039/d1cc04140a), 2021-01-01
Supplement: d1cc04140a4.pdf [file d1cc04140a4.pdf]

## Copies of Spectra

$^1\text{H}$  NMR (Varian, 400 MHz) spectrum of compound **1aa** in  $\text{DMSO-}d_6$

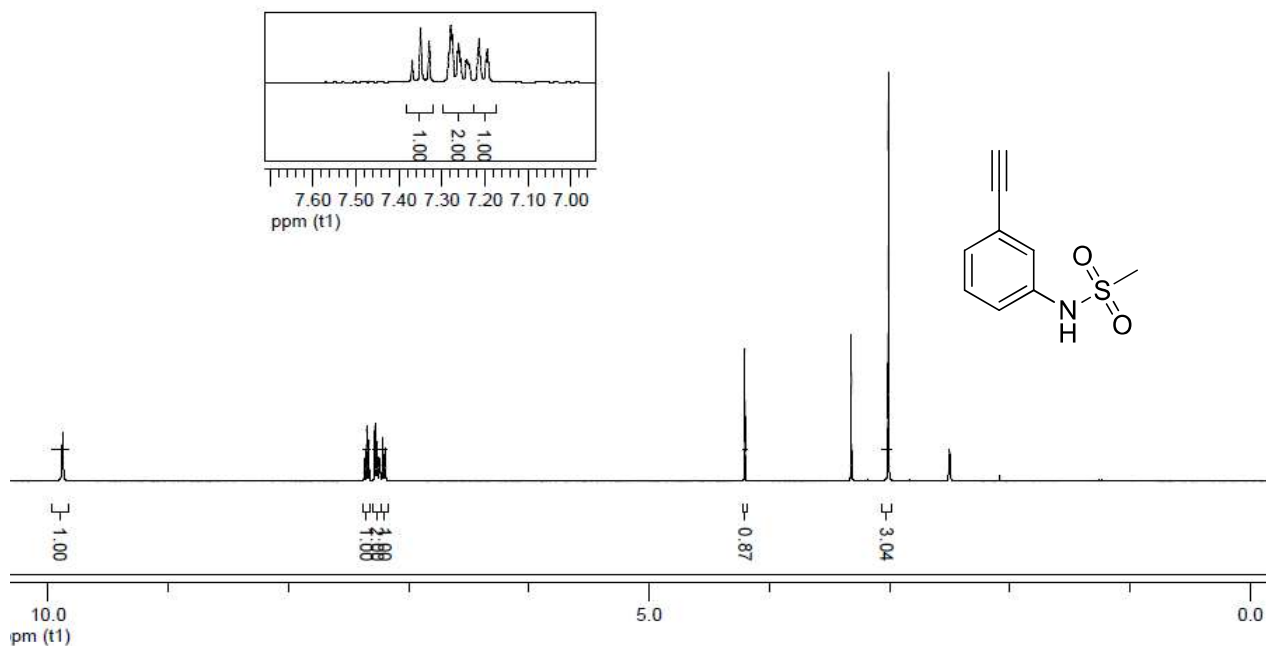

$^{13}\text{C}$  NMR spectrum (Varian, 100 MHz) of compound **1aa** in  $\text{DMSO-}d_6$

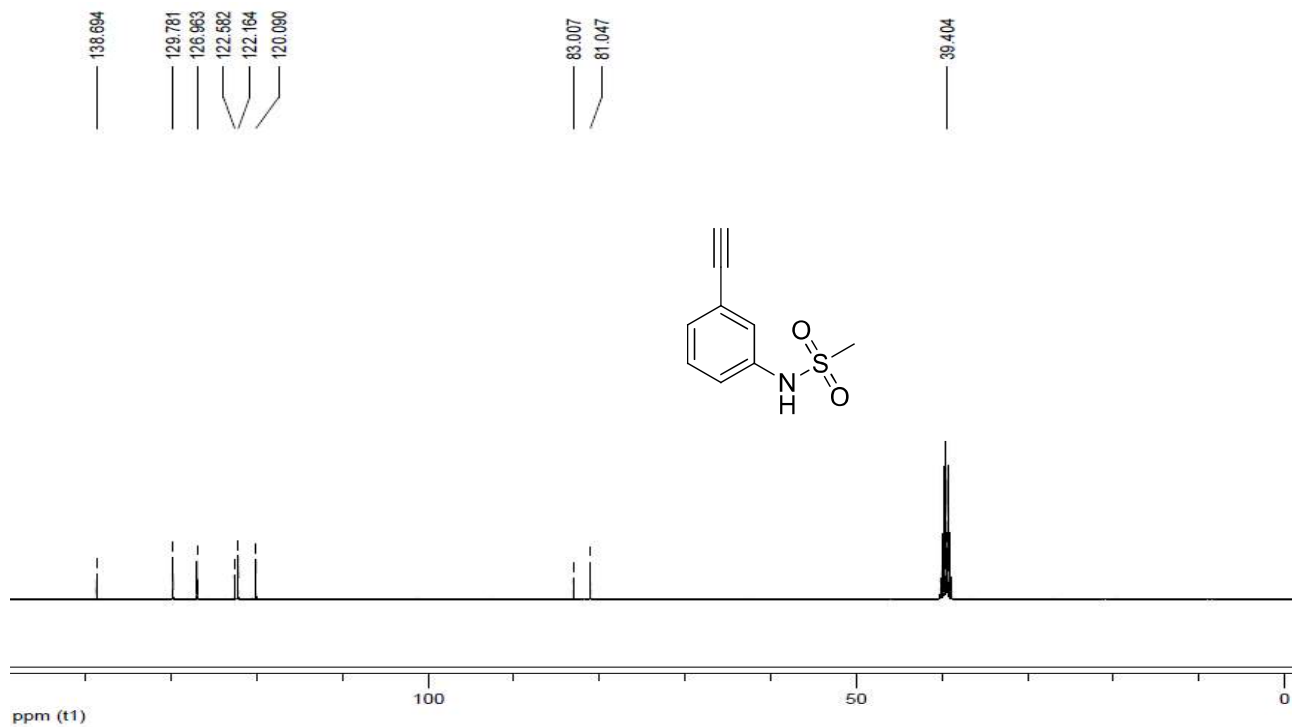

$^1\text{H}$  NMR (Varian, 400 MHz) spectrum of compound **1ab** in  $\text{DMSO-}d_6$

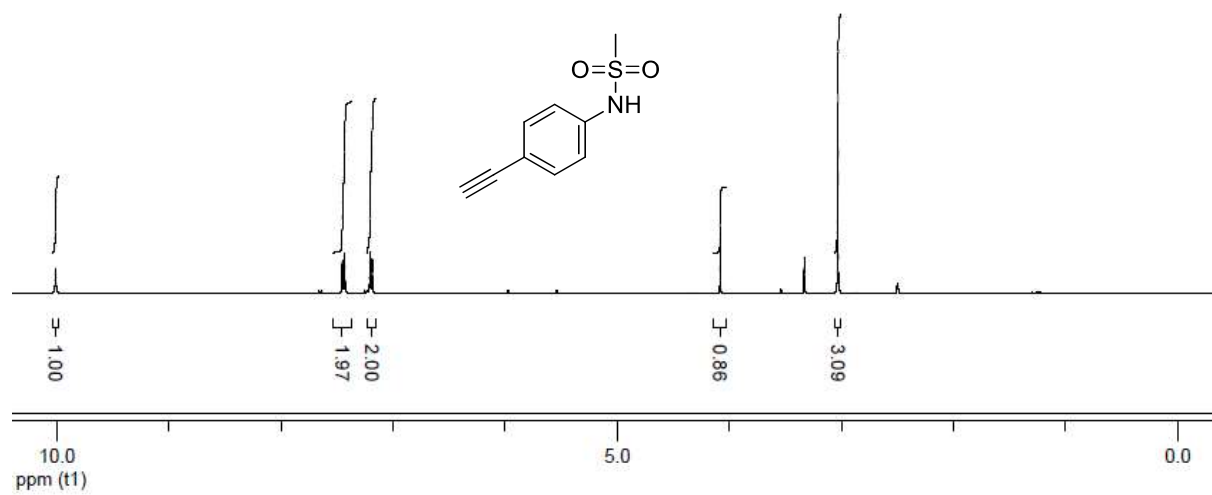

$^{13}\text{C}$  NMR spectrum (Varian, 100 MHz) of compound **1ab** in  $\text{DMSO-}d_6$

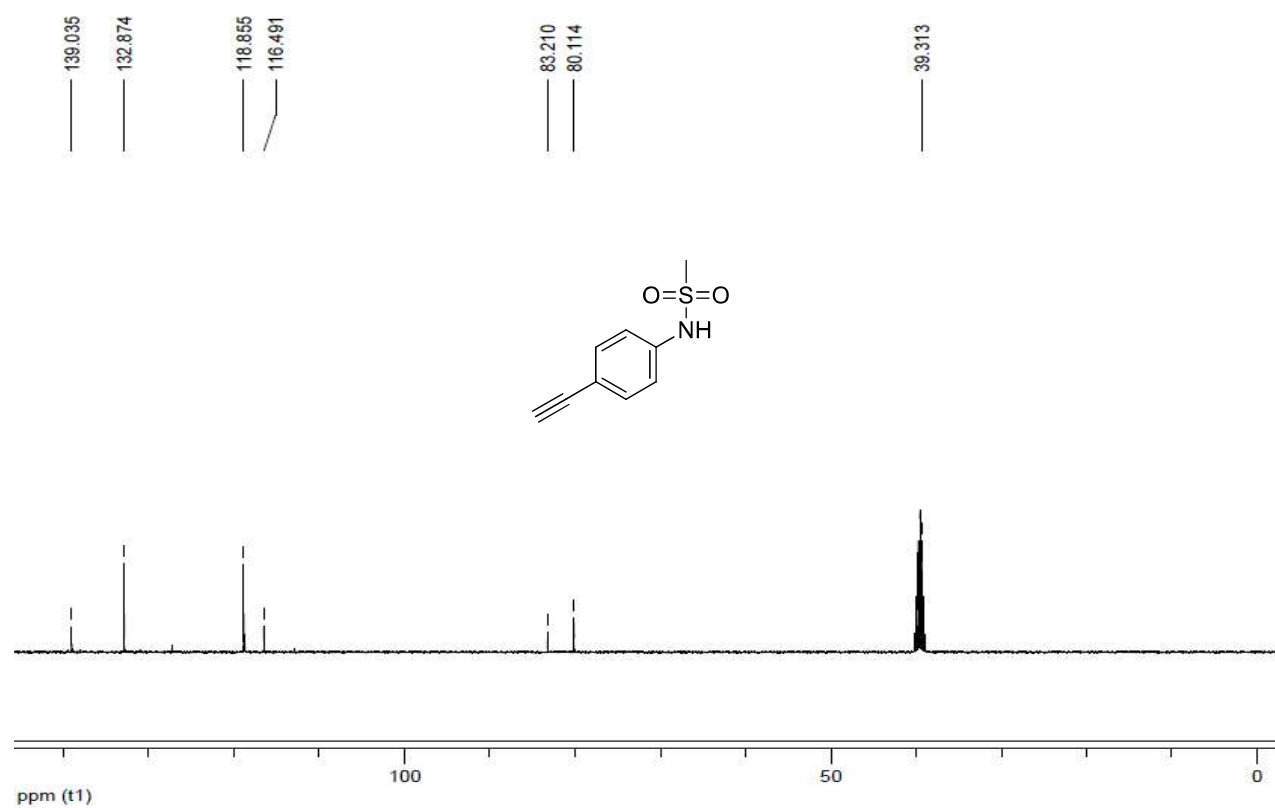

$^1\text{H}$  NMR (Varian, 400 MHz) spectrum of compound **1ac** in  $\text{DMSO-}d_6$

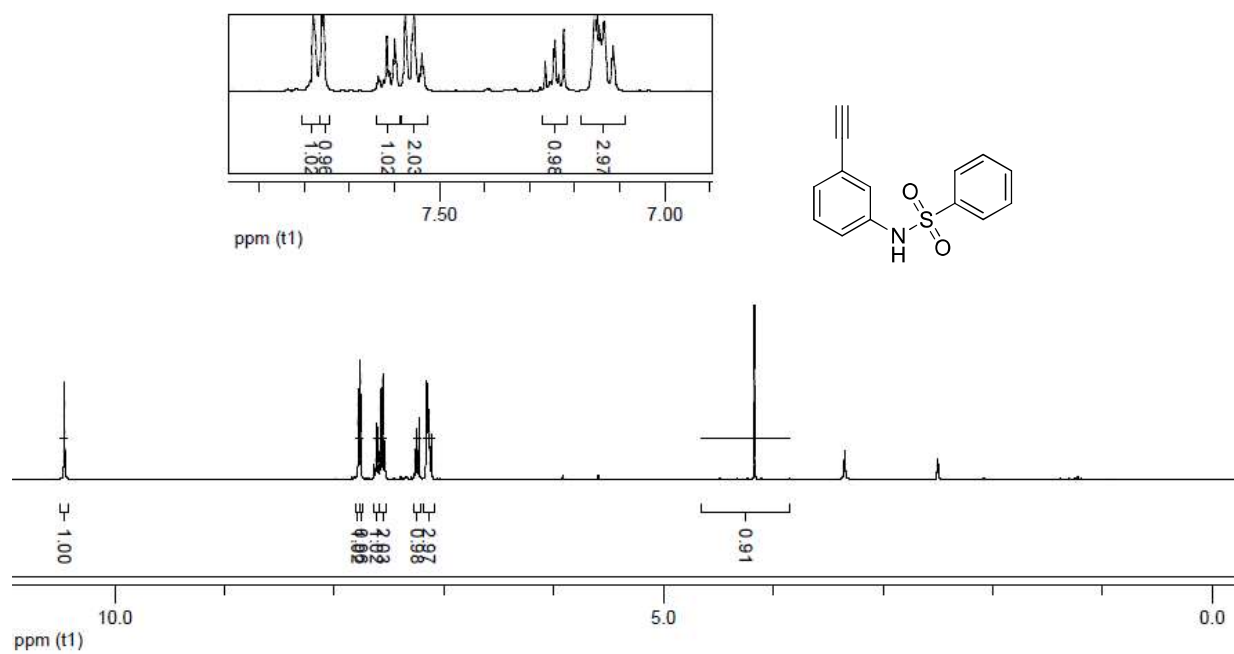

$^{13}\text{C}$  NMR spectrum (Varian, 100 MHz) of compound **1ac** in  $\text{DMSO-}d_6$

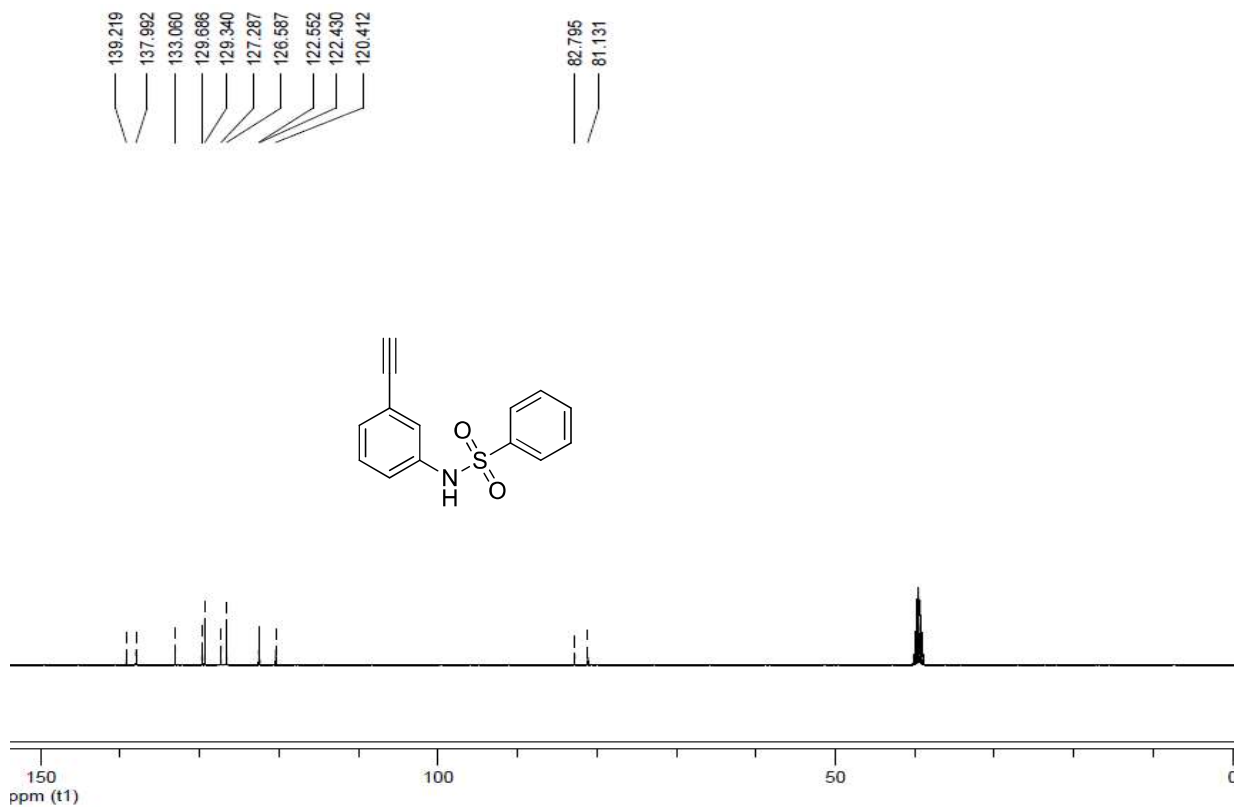

$^1\text{H}$  NMR (Varian, 400 MHz) spectrum of compound **1ad** in  $\text{DMSO-}d_6$

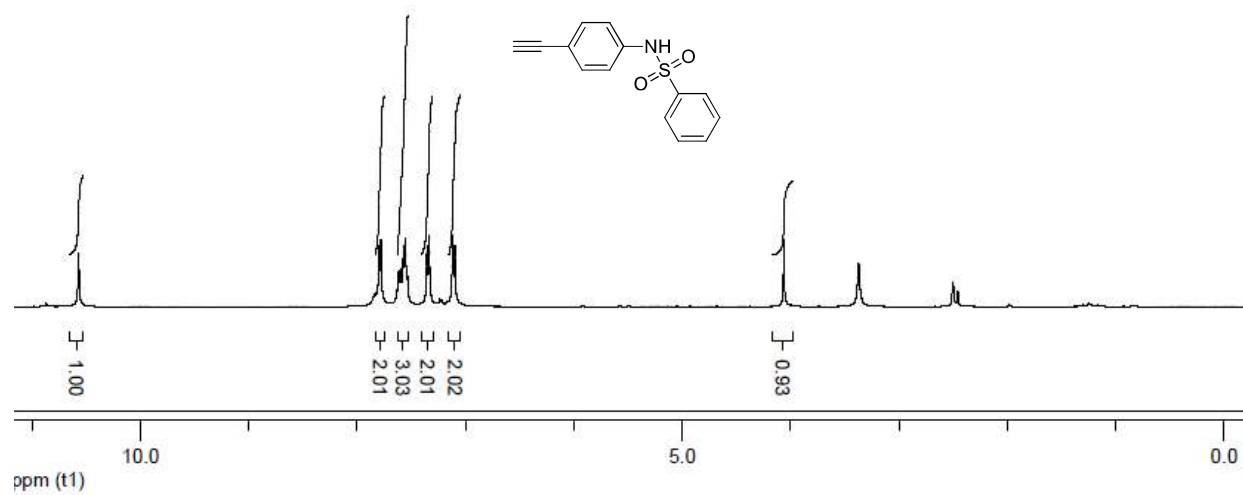

$^{13}\text{C}$  NMR spectrum (Varian, 100 MHz) of compound **1ad** in  $\text{DMSO-}d_6$

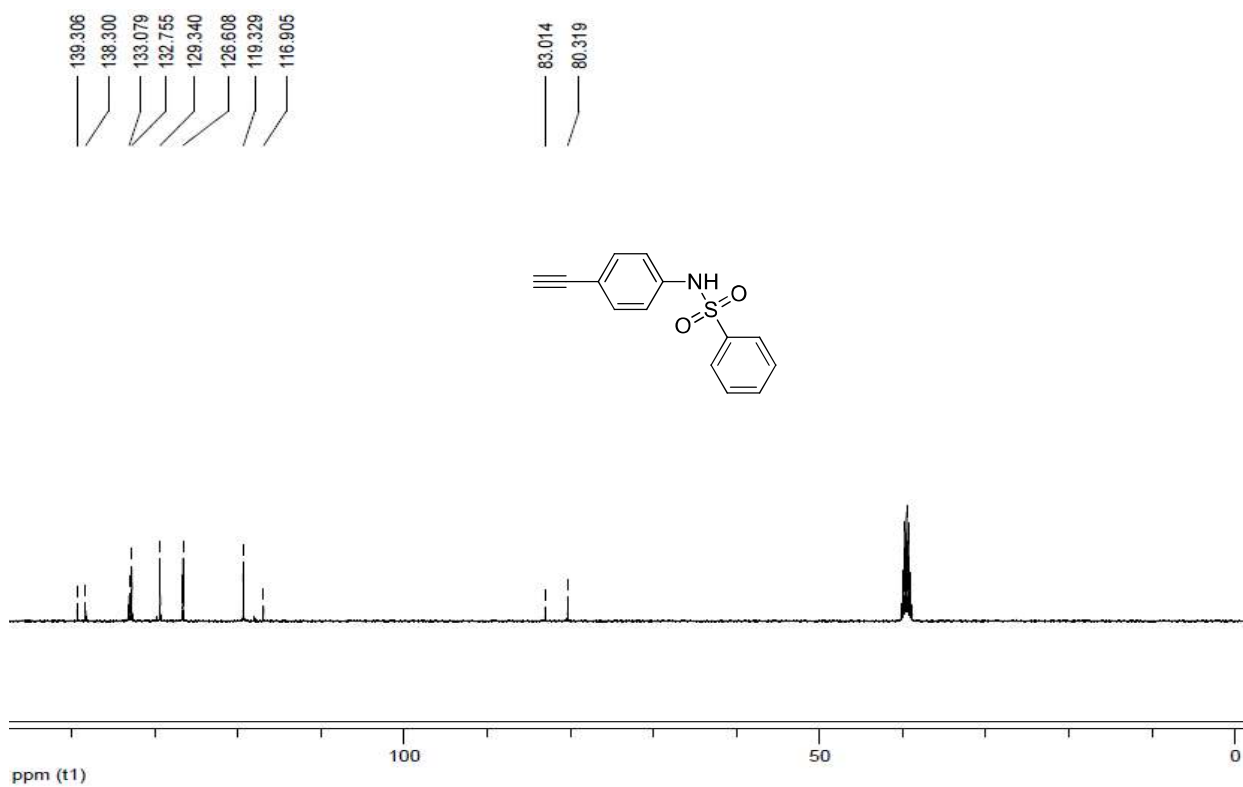



$^1\text{H}$  NMR (Varian, 400 MHz) spectrum of compound **1ae** in  $\text{DMSO-}d_6$

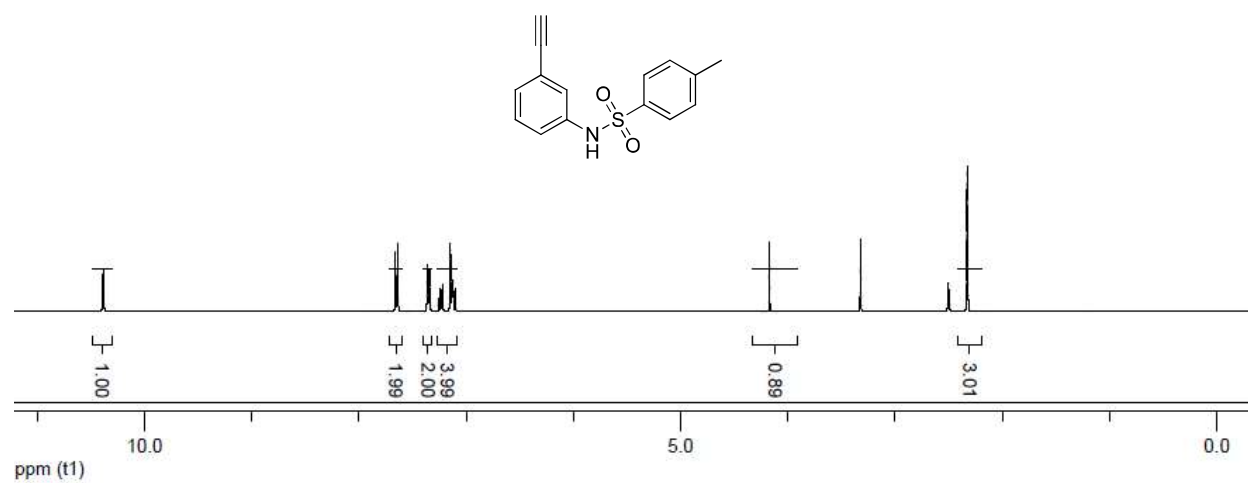

$^{13}\text{C}$  NMR spectrum (Varian, 100 MHz) of compound **1ae** in  $\text{DMSO-}d_6$

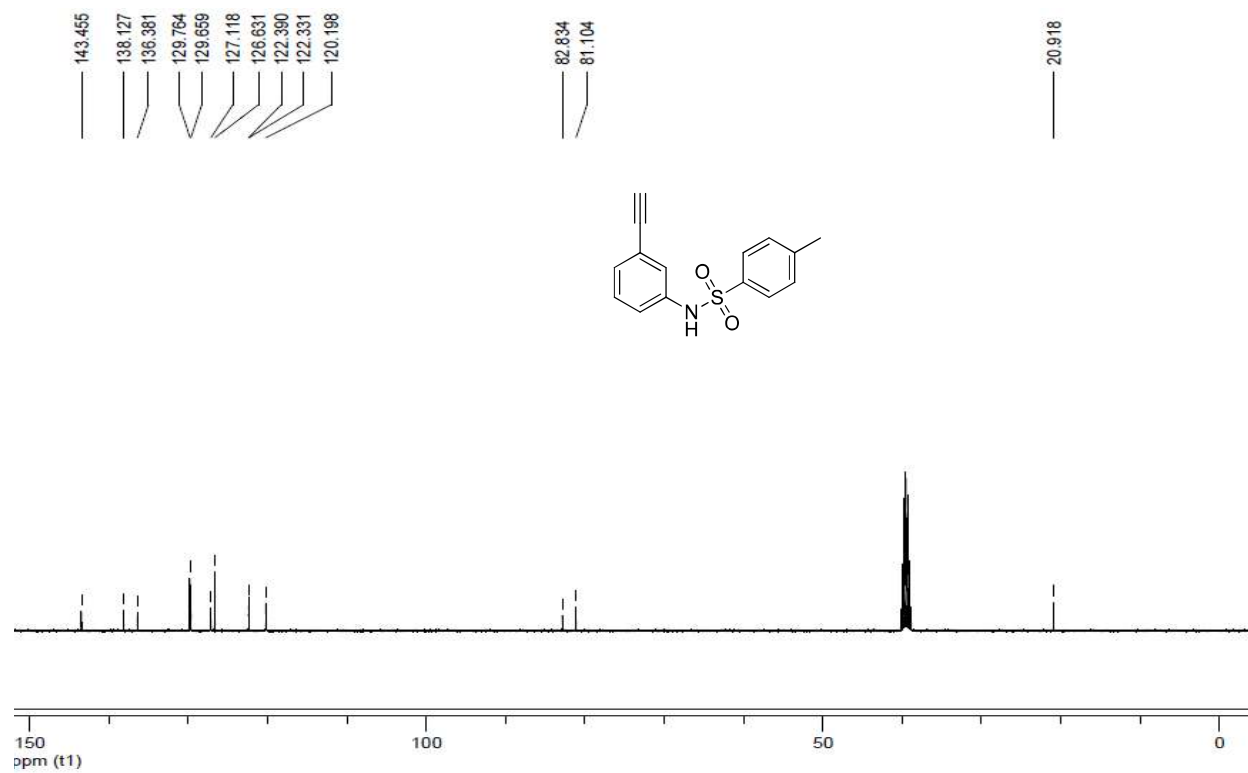

$^1\text{H}$  NMR (Varian, 400 MHz) spectrum of compound **1af** in  $\text{DMSO-}d_6$

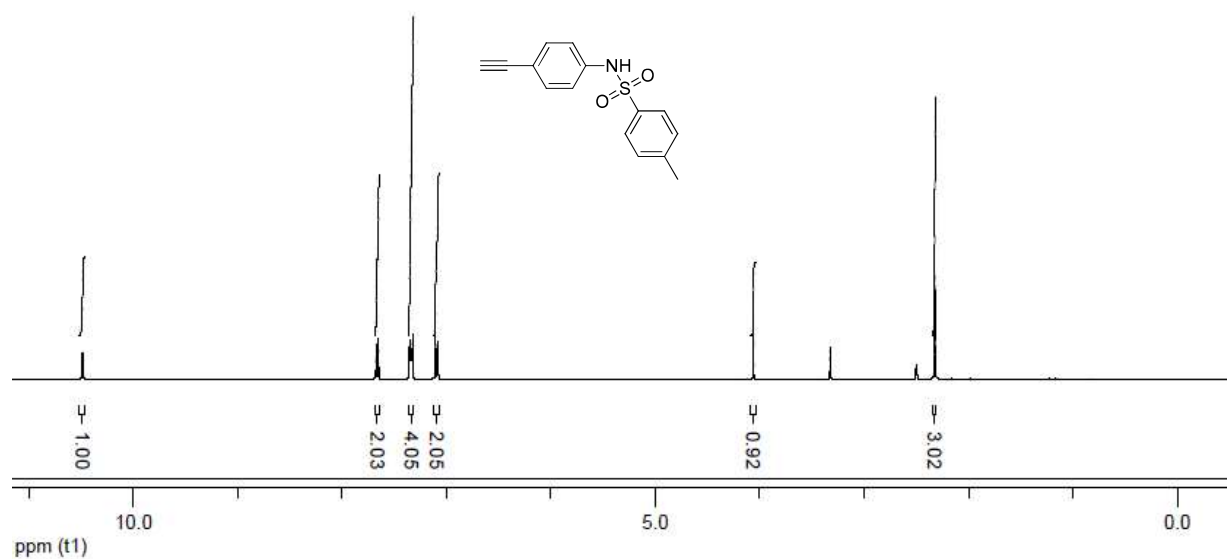

$^{13}\text{C}$  NMR spectrum (Varian, 100 MHz) of compound **1af** in  $\text{DMSO-}d_6$

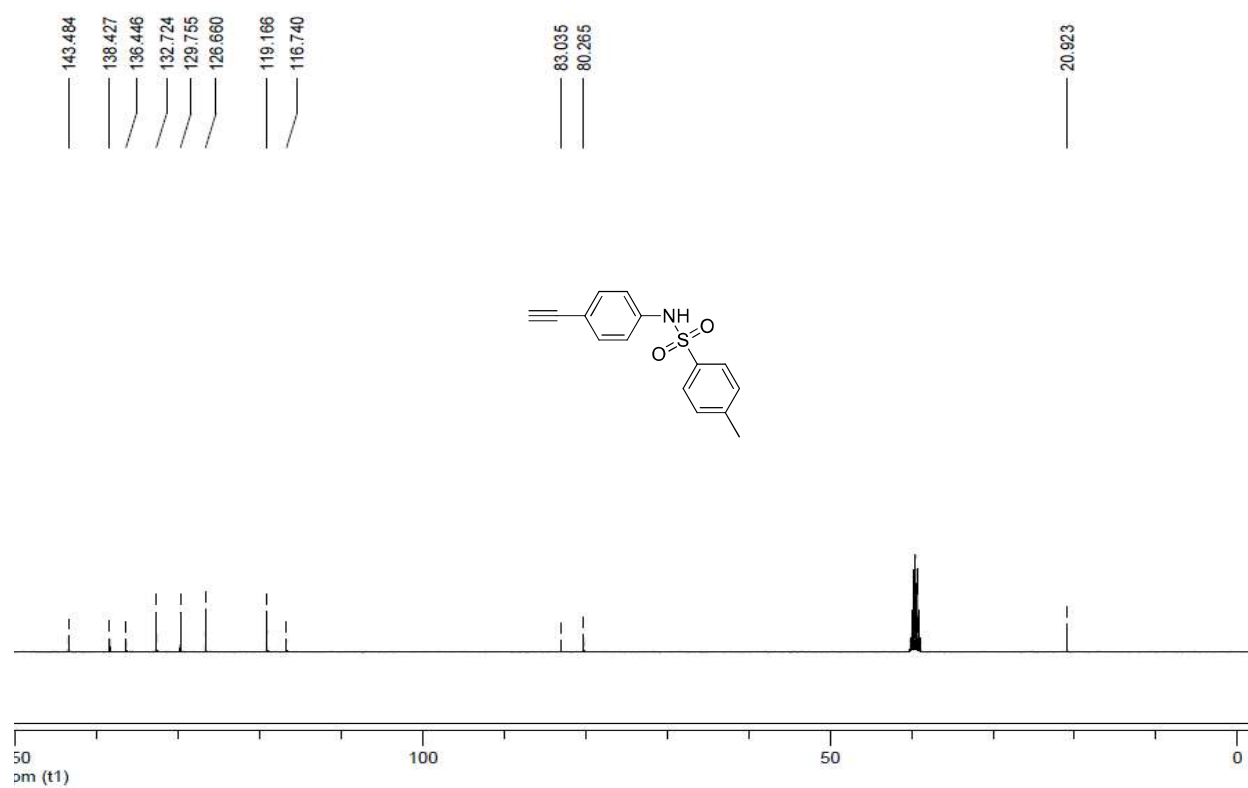

$^1\text{H}$  NMR (Varian, 400 MHz) spectrum of compound **1ag** in  $\text{DMSO-}d_6$

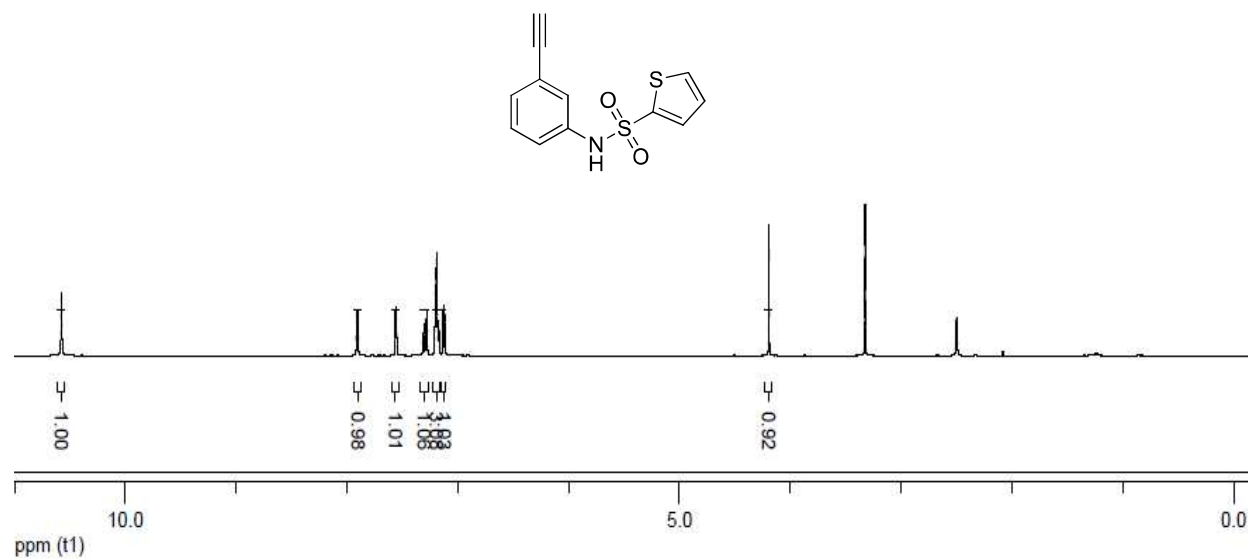

$^{13}\text{C}$  NMR spectrum (Varian, 100 MHz) of compound **1ag** in  $\text{DMSO-}d_6$

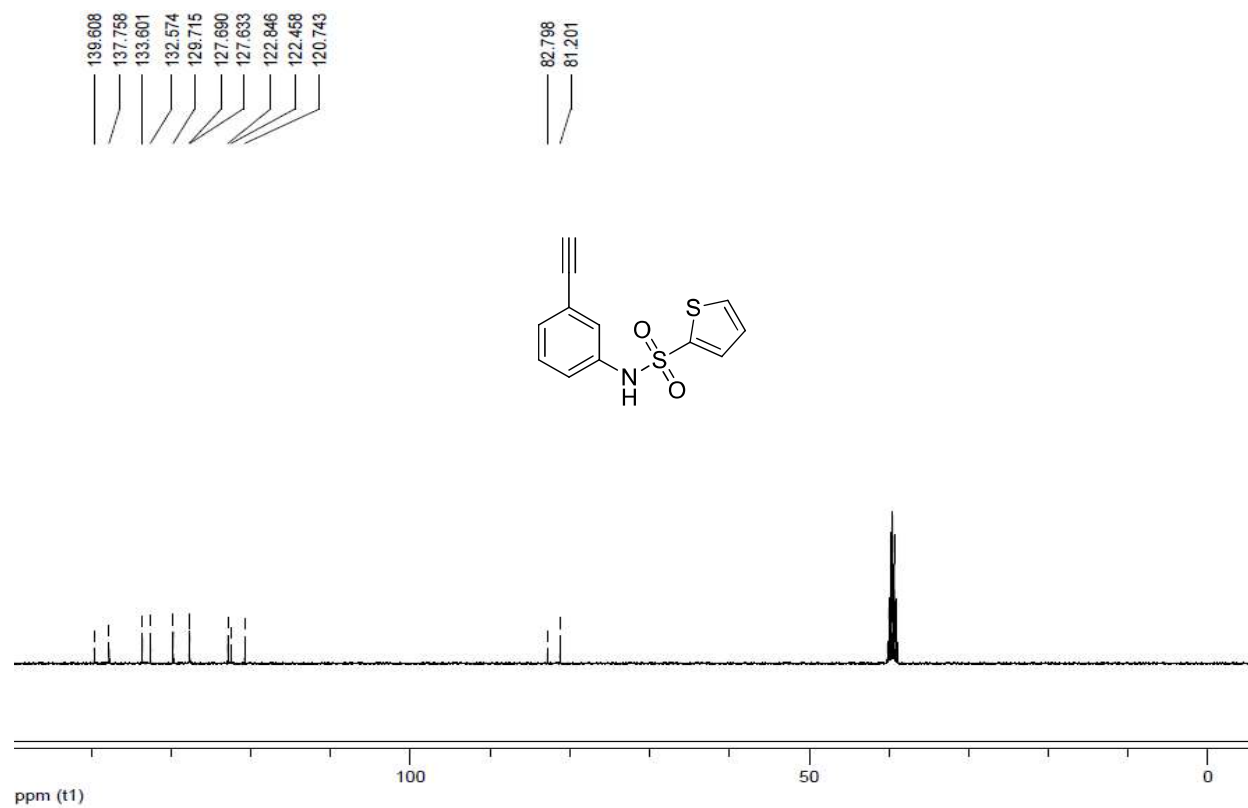

$^1\text{H}$  NMR (Varian, 400 MHz) spectrum of compound **1ah** in  $\text{DMSO-}d_6$

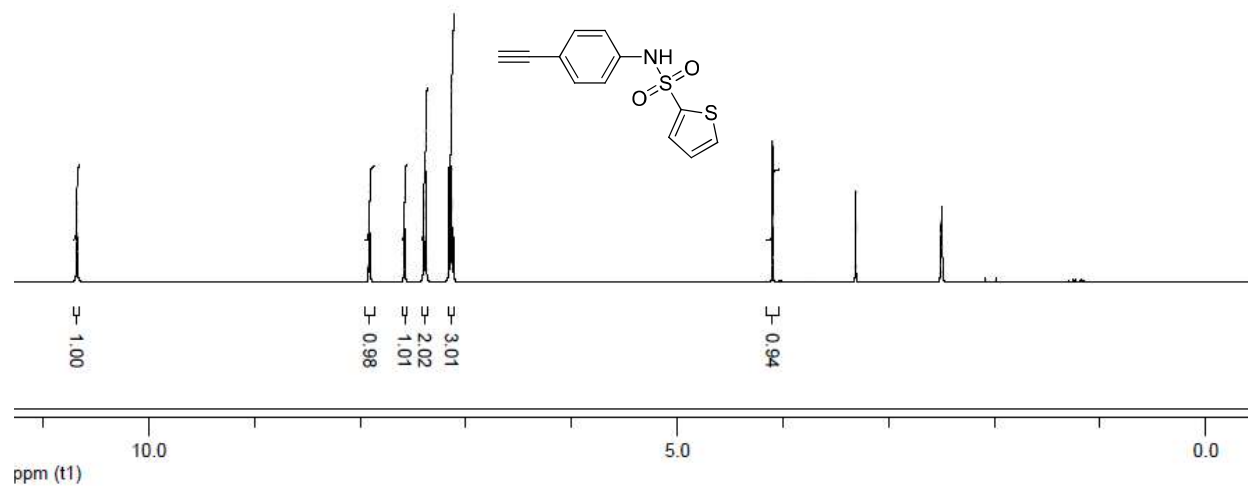

$^{13}\text{C}$  NMR spectrum (Varian, 100 MHz) of compound **1ah** in  $\text{DMSO-}d_6$

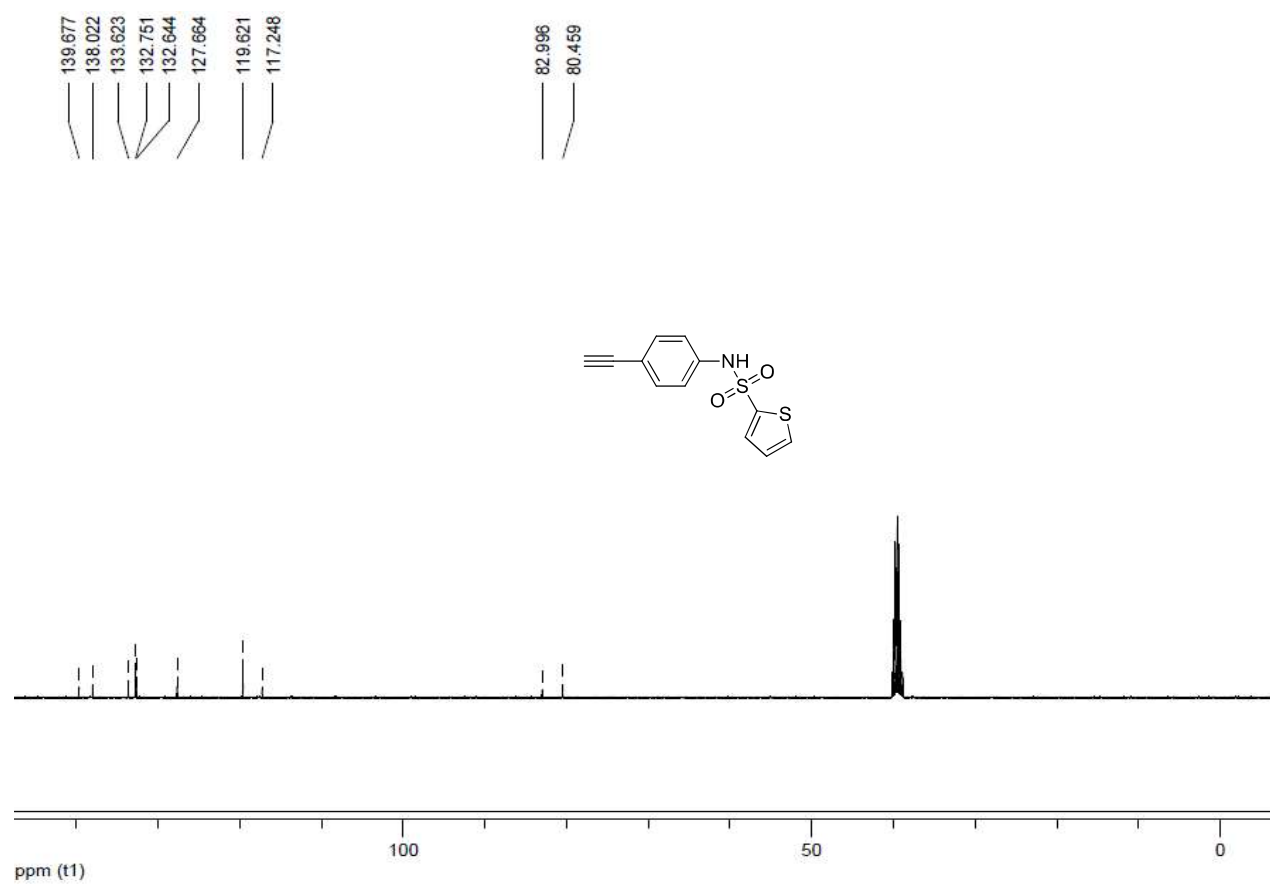

$^1\text{H}$  NMR (Varian, 400 MHz) spectrum of compound **1ai** in  $\text{DMSO-}d_6$

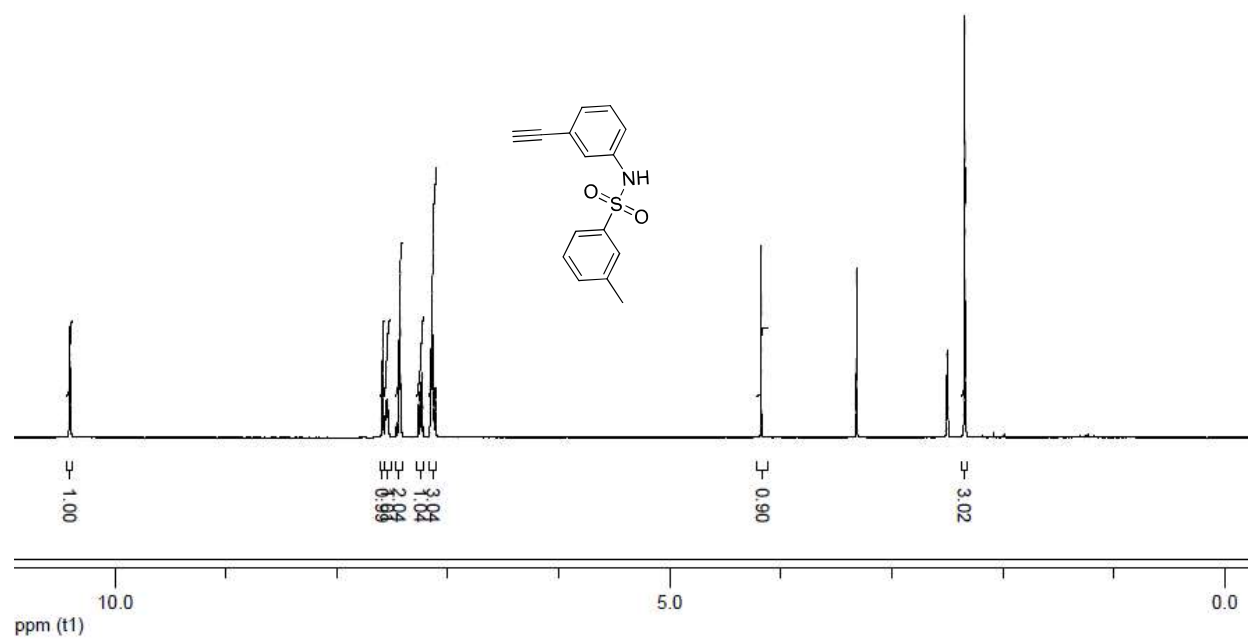

$^{13}\text{C}$  NMR spectrum (Varian, 100 MHz) of compound **1ai** in  $\text{DMSO-}d_6$

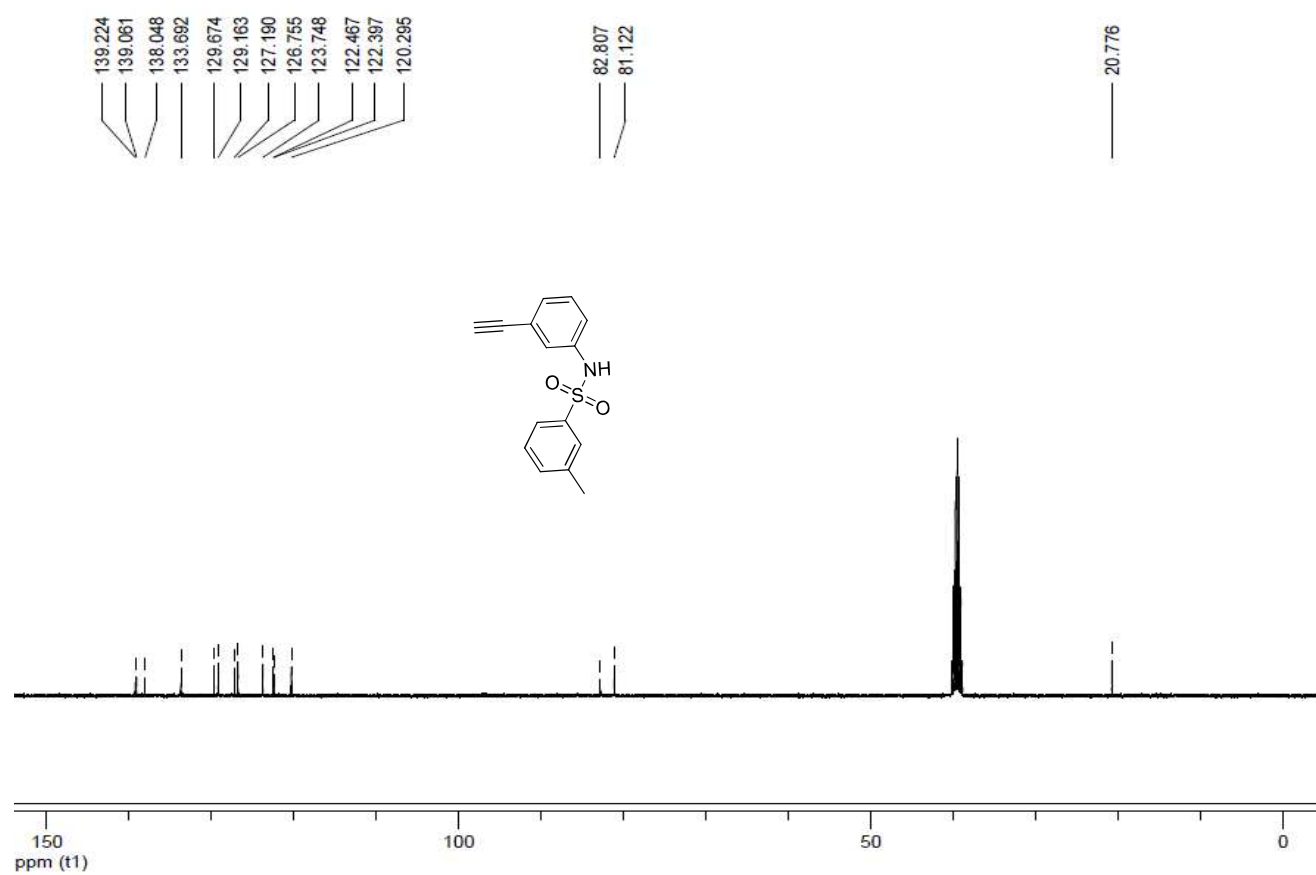

$^1\text{H}$  NMR (Varian, 400 MHz) spectrum of compound **2a** in  $\text{DMSO-}d_6$

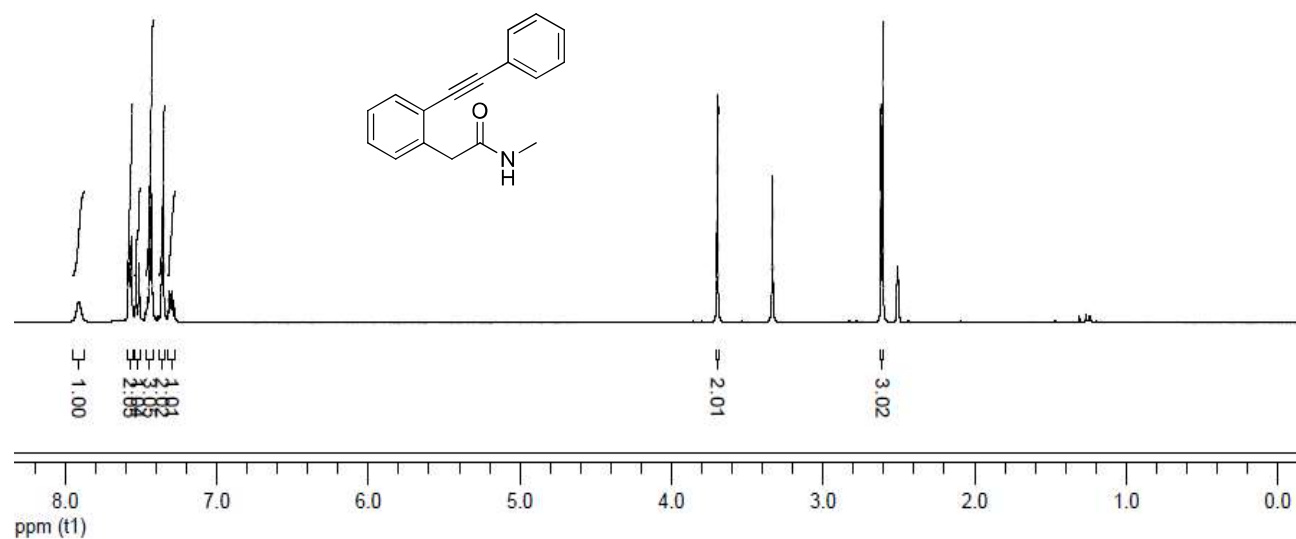

$^{13}\text{C}$  NMR spectrum (Varian, 100 MHz) of compound **2a** in  $\text{DMSO-}d_6$

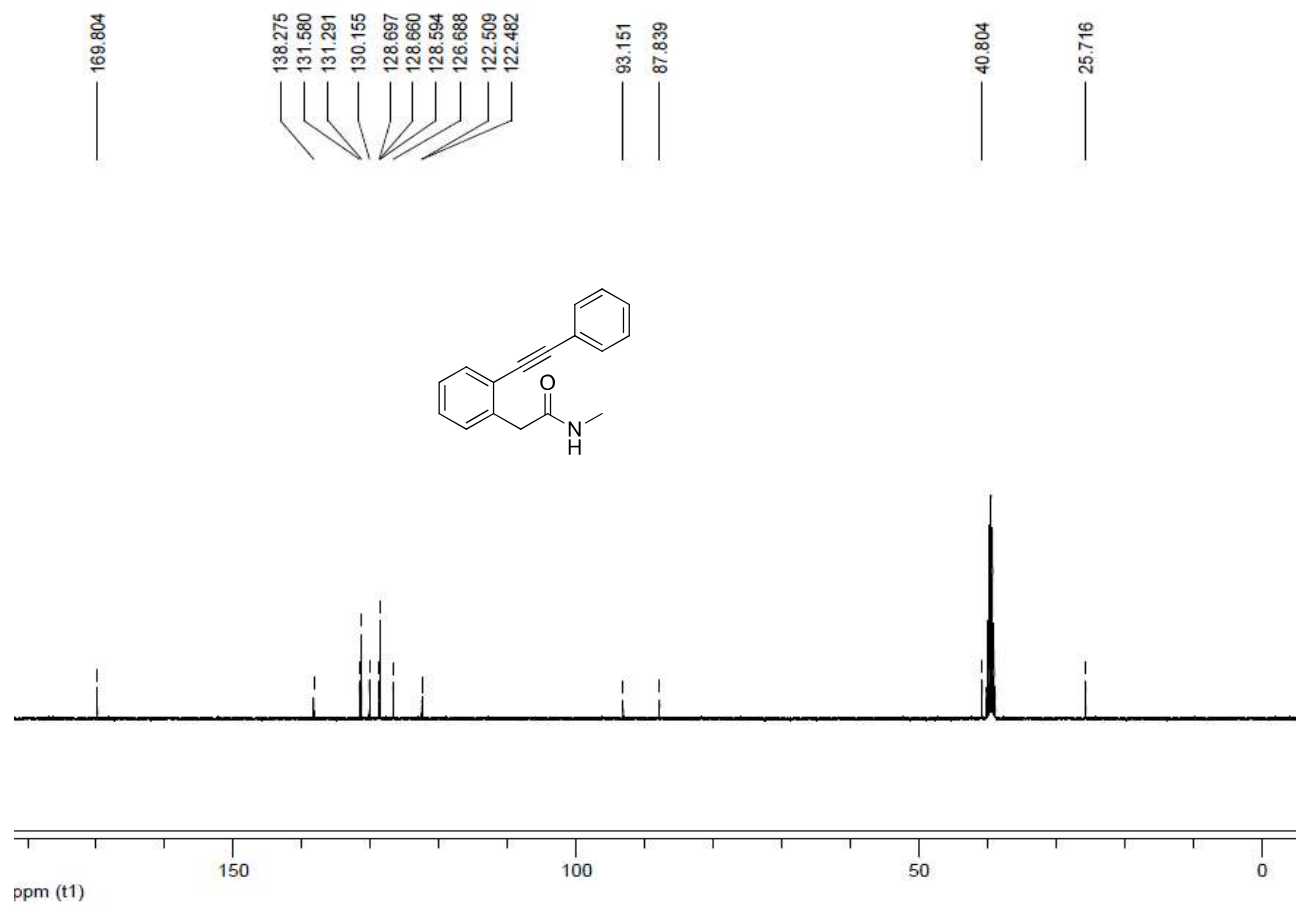

$^1\text{H}$  NMR (Varian, 400 MHz) spectrum of compound **2aa** in  $\text{DMSO-}d_6$

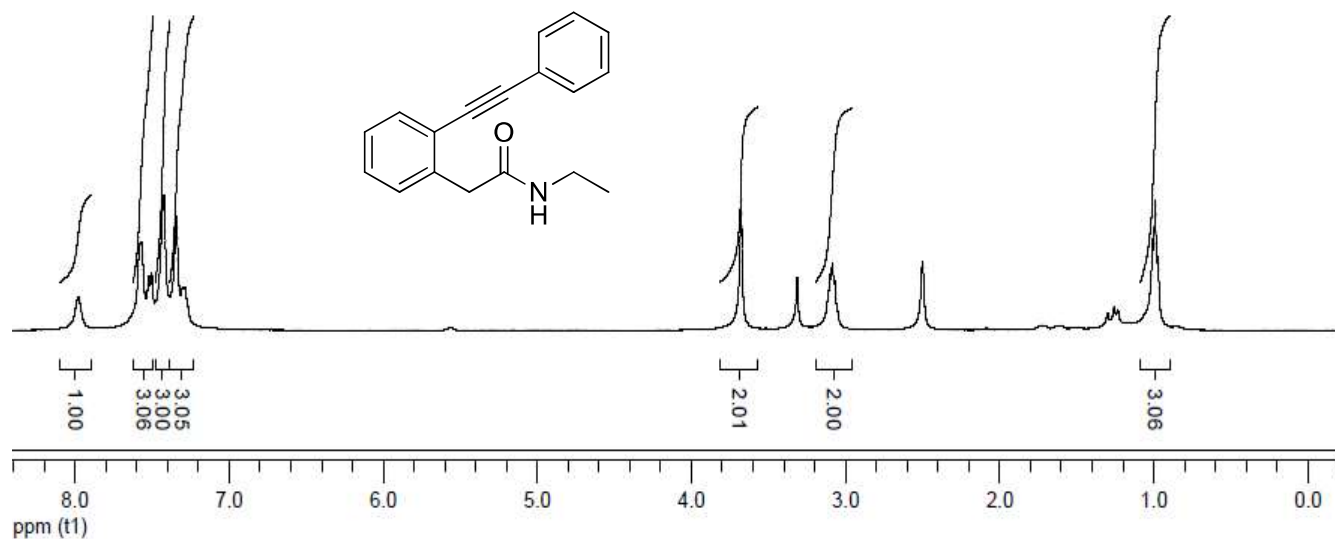

$^{13}\text{C}$  NMR spectrum (Varian, 100 MHz) of compound **2aa** in  $\text{DMSO-}d_6$

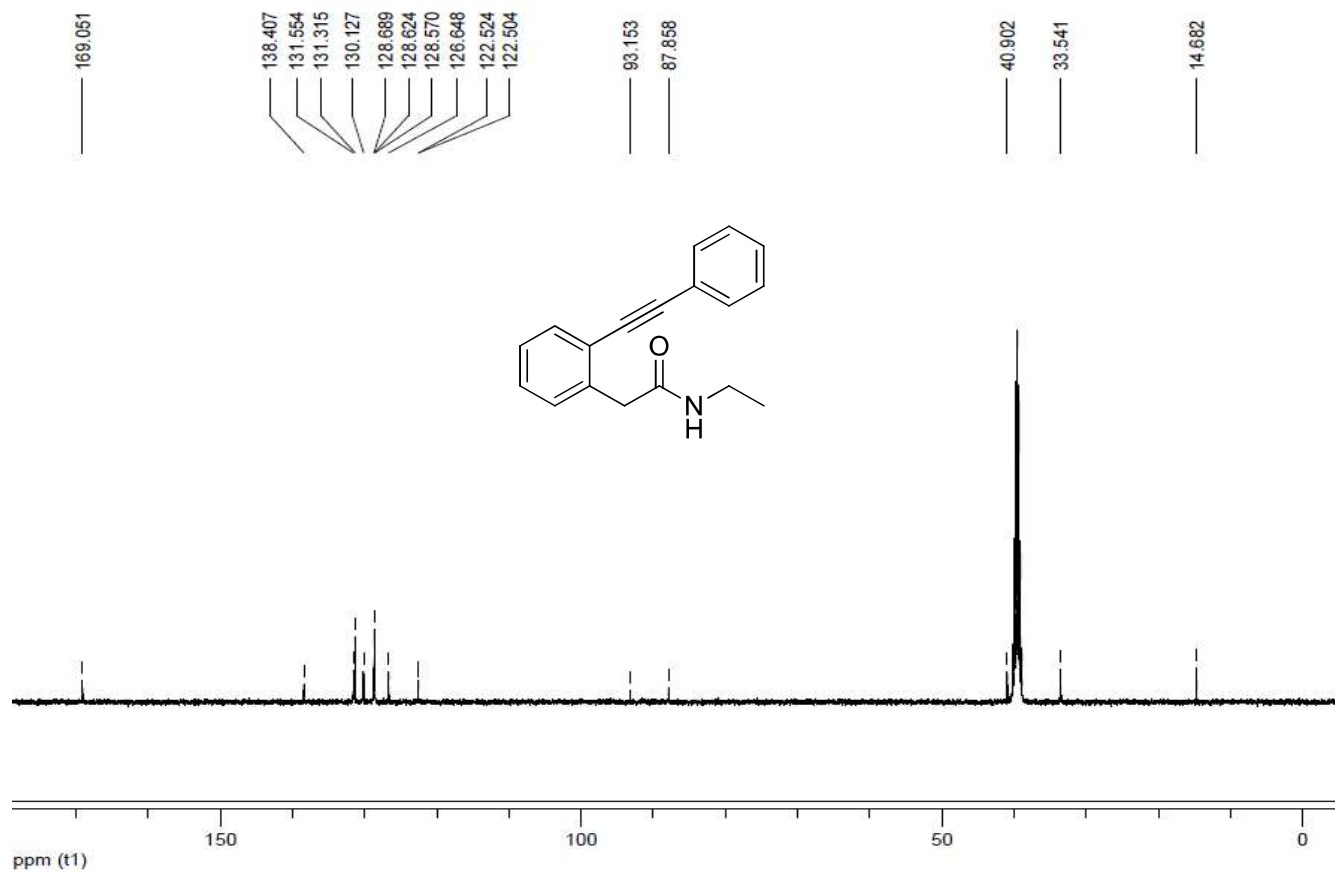

$^1\text{H}$  NMR (Varian, 400 MHz) spectrum of compound **2b** in  $\text{CDCl}_3$

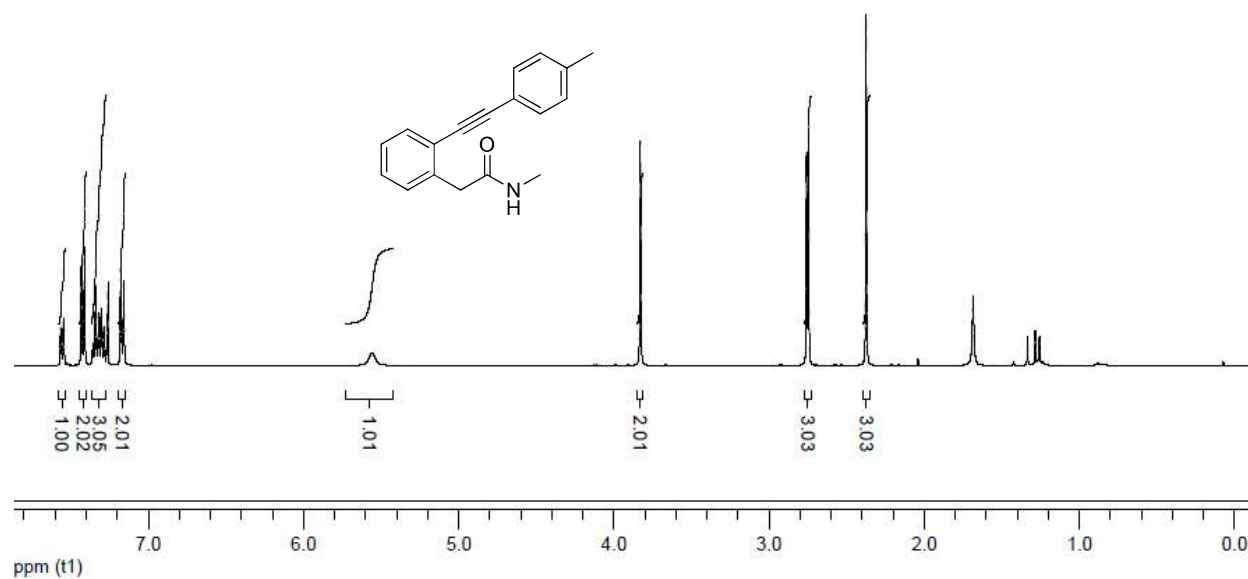

$^{13}\text{C}$  NMR spectrum (Varian, 100 MHz) of compound **2b** in  $\text{CDCl}_3$

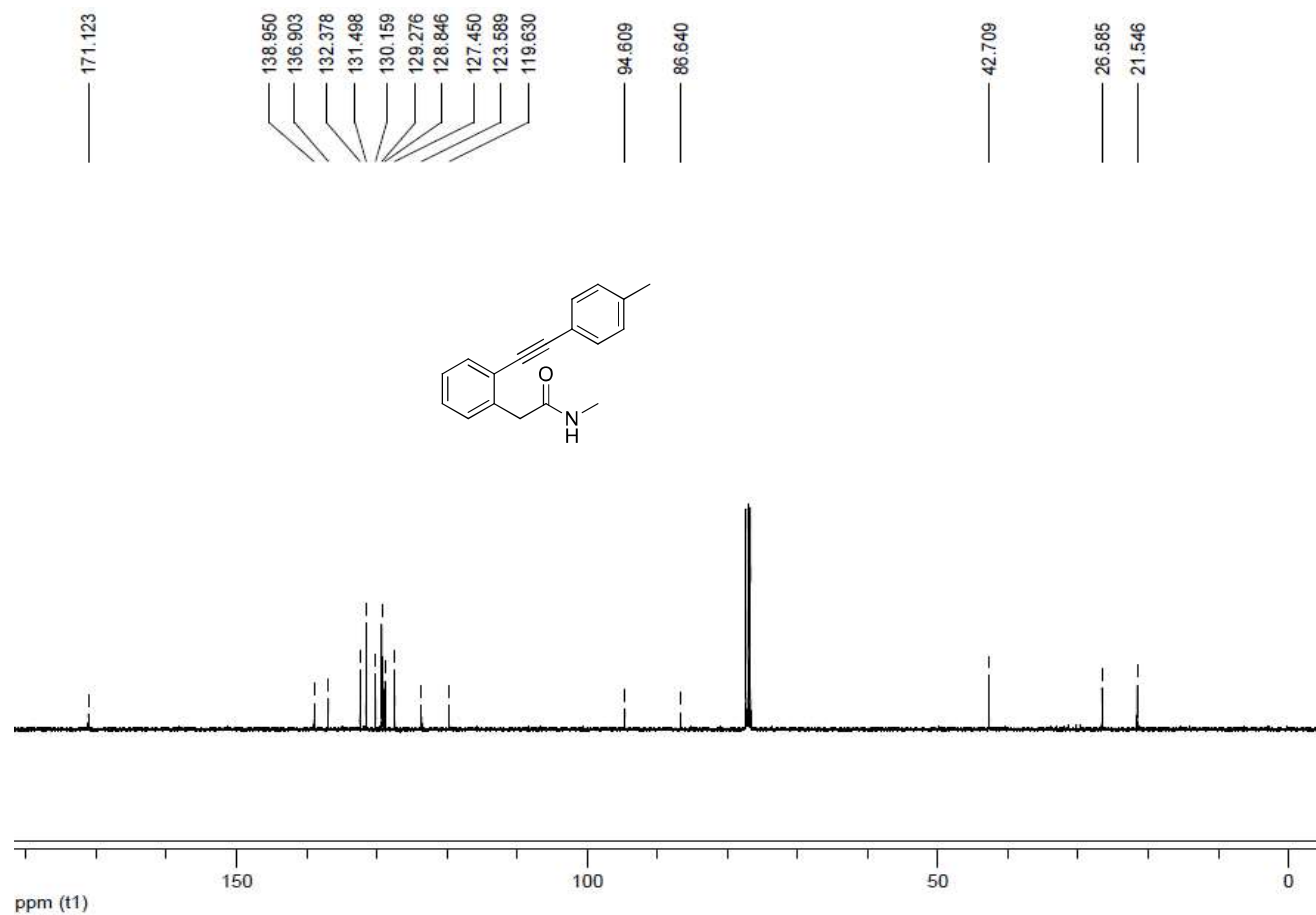



$^1\text{H}$  NMR (Varian, 400 MHz) spectrum of compound **2c** in  $\text{CDCl}_3$

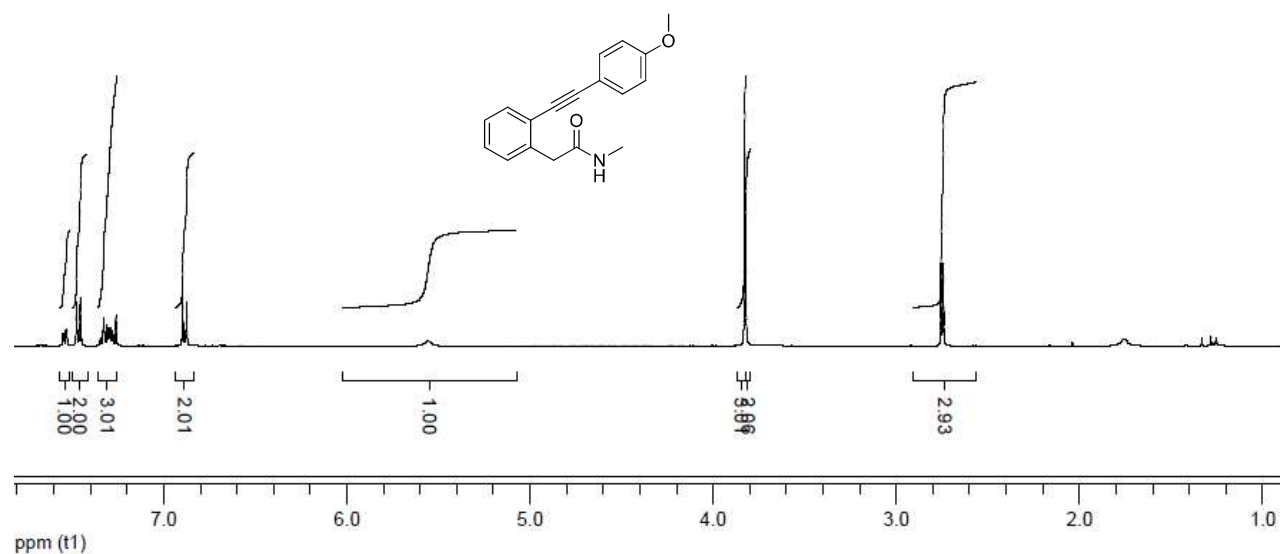

$^{13}\text{C}$  NMR spectrum (Varian, 100 MHz) of compound **2c** in  $\text{CDCl}_3$

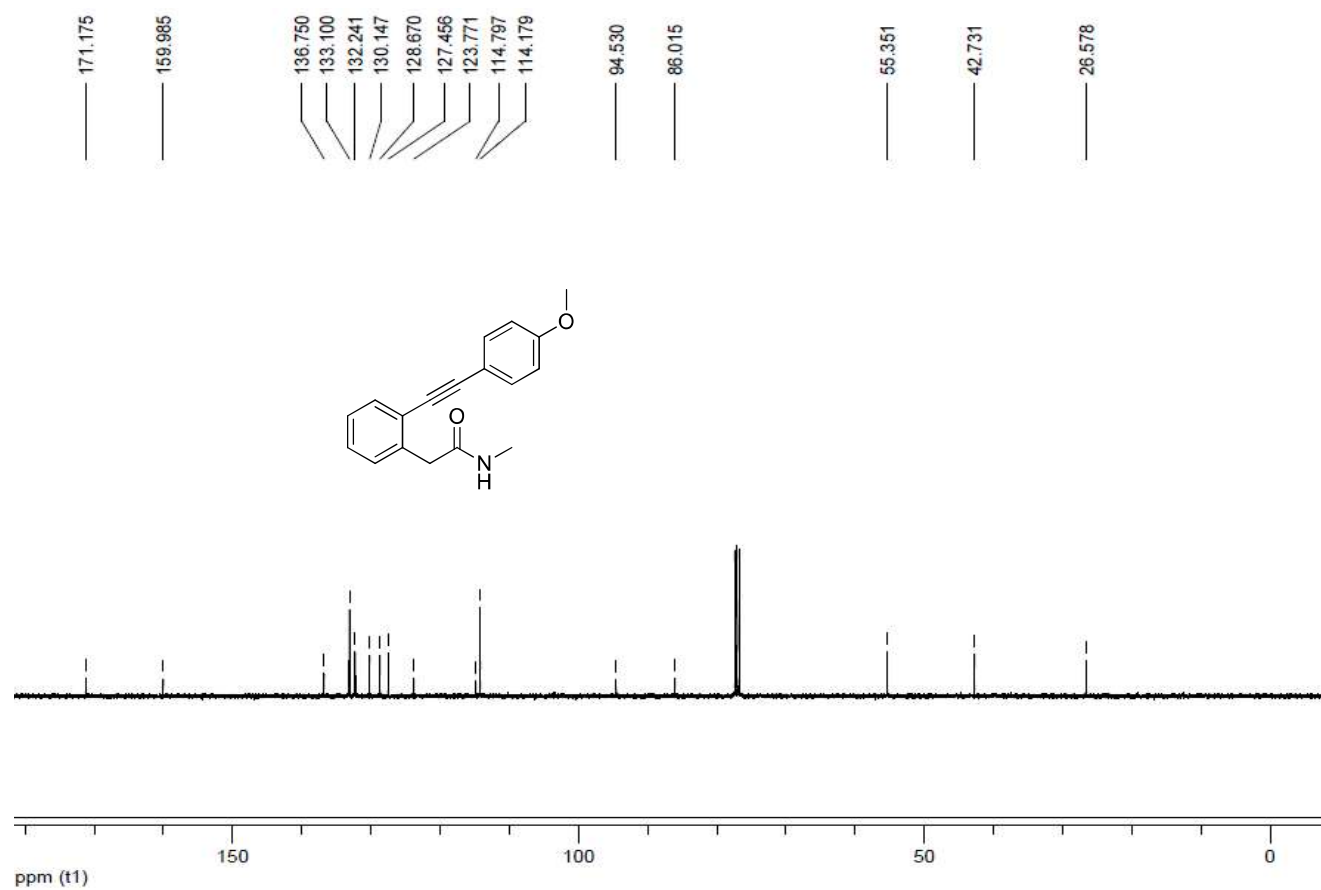

$^1\text{H}$  NMR (Varian, 400 MHz) spectrum of compound **2d** in  $\text{DMSO-}d_6$

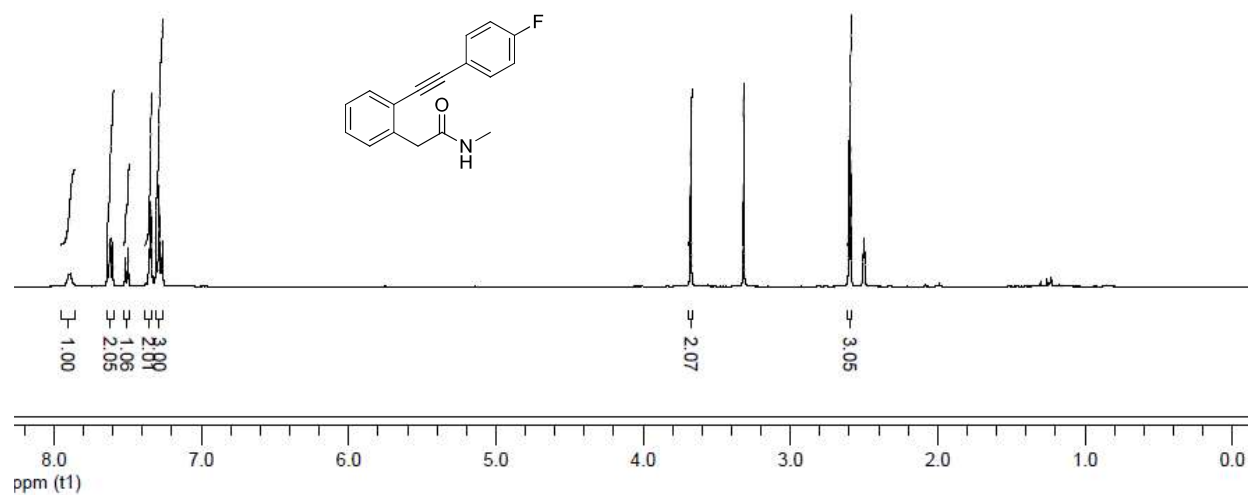

$^{13}\text{C}$  NMR spectrum (Varian, 100 MHz) of compound **2d** in  $\text{DMSO-}d_6$

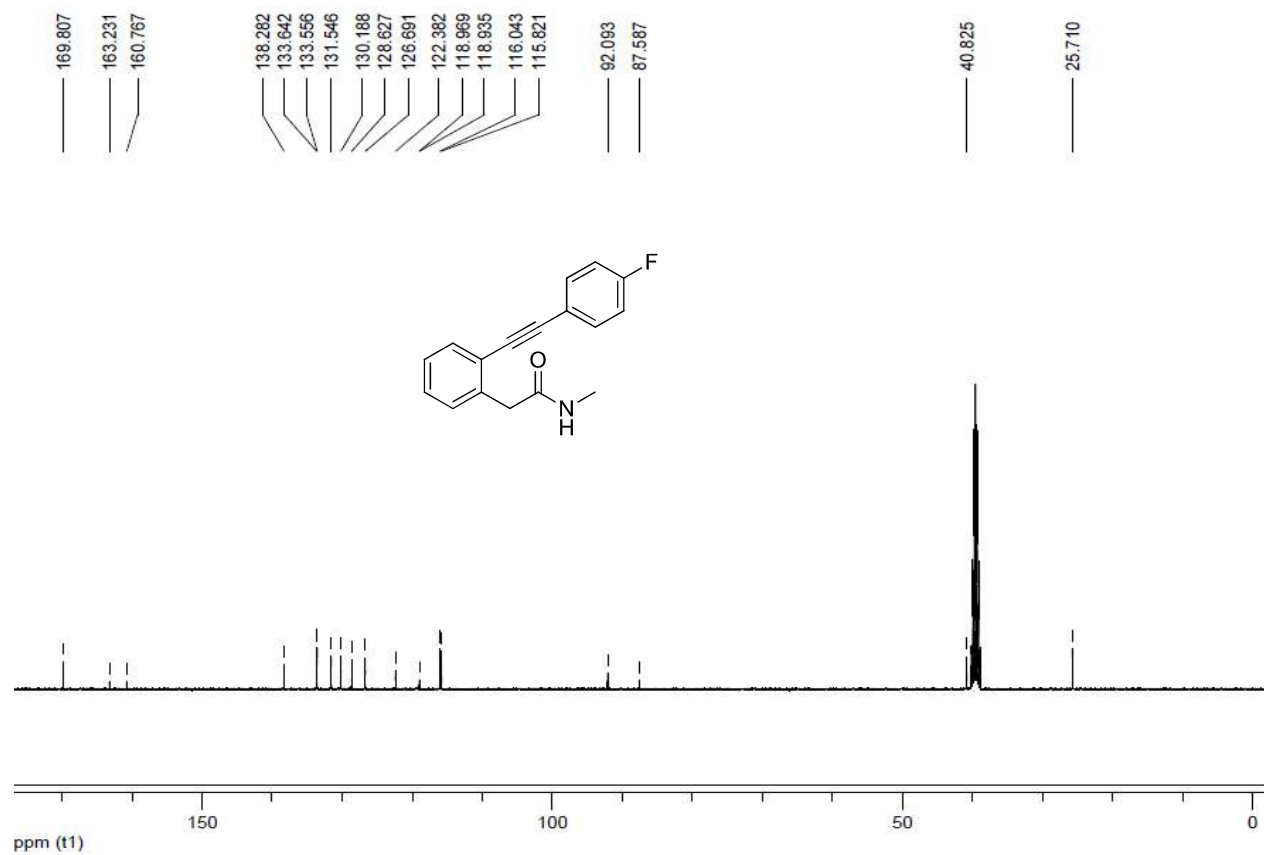

<sup>1</sup>H NMR (Varian, 400 MHz) spectrum of compound **2e** in DMSO-*d*<sub>6</sub>

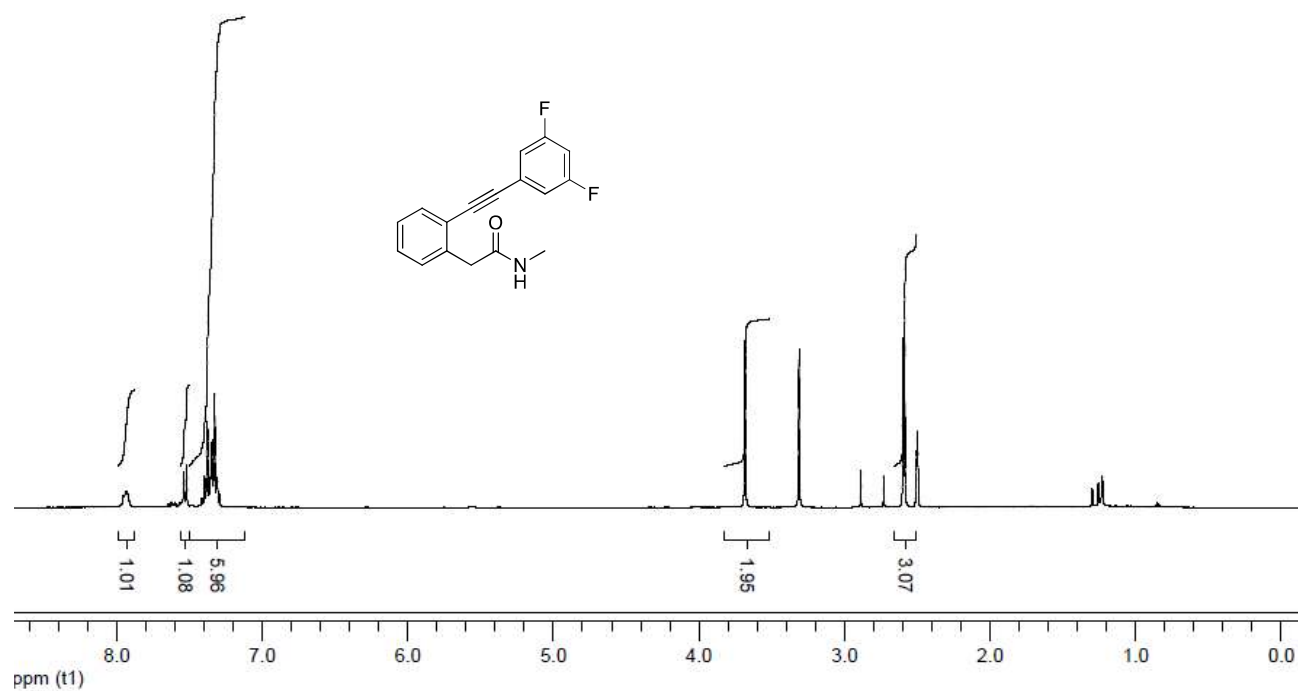

<sup>13</sup>C NMR spectrum (Varian, 100 MHz) of compound **2e** in DMSO-*d*<sub>6</sub>

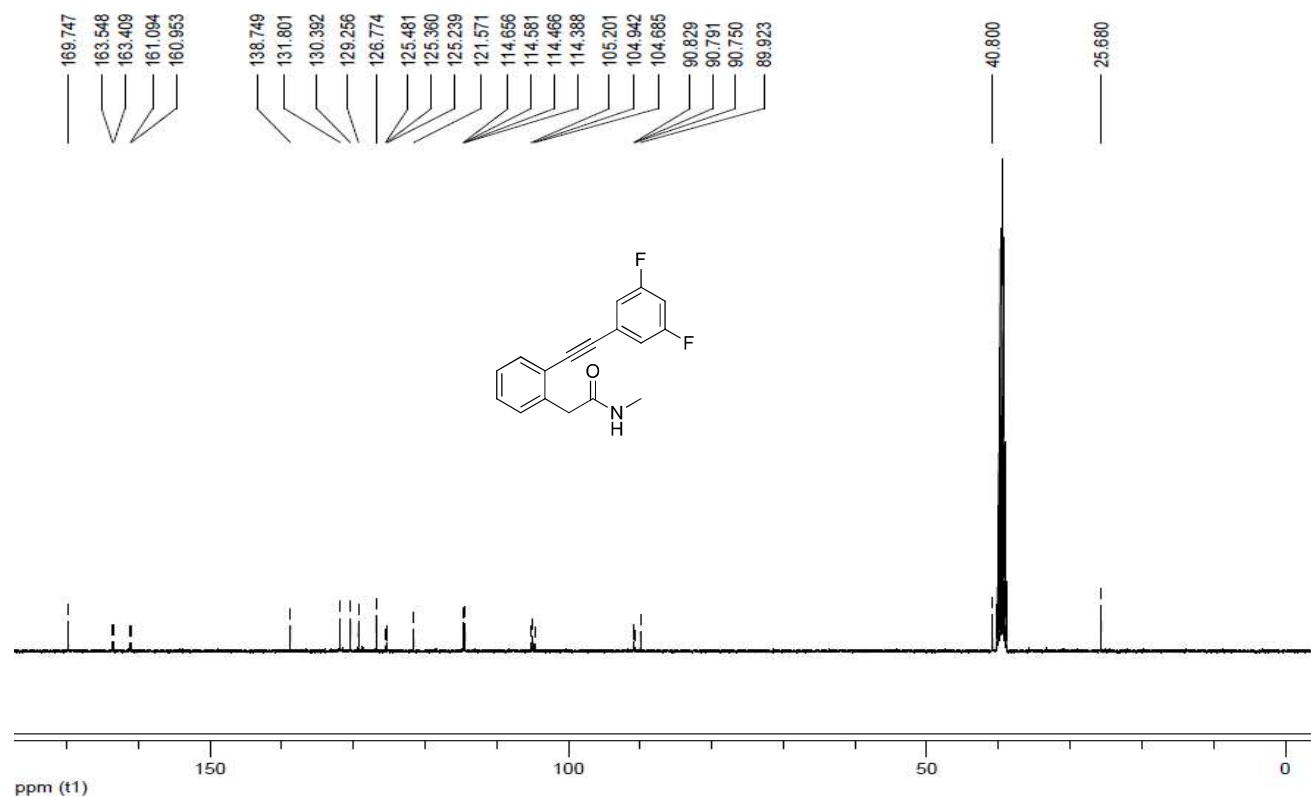

$^1\text{H}$  NMR (Varian, 400 MHz) spectrum of compound **2f** in  $\text{DMSO-}d_6$

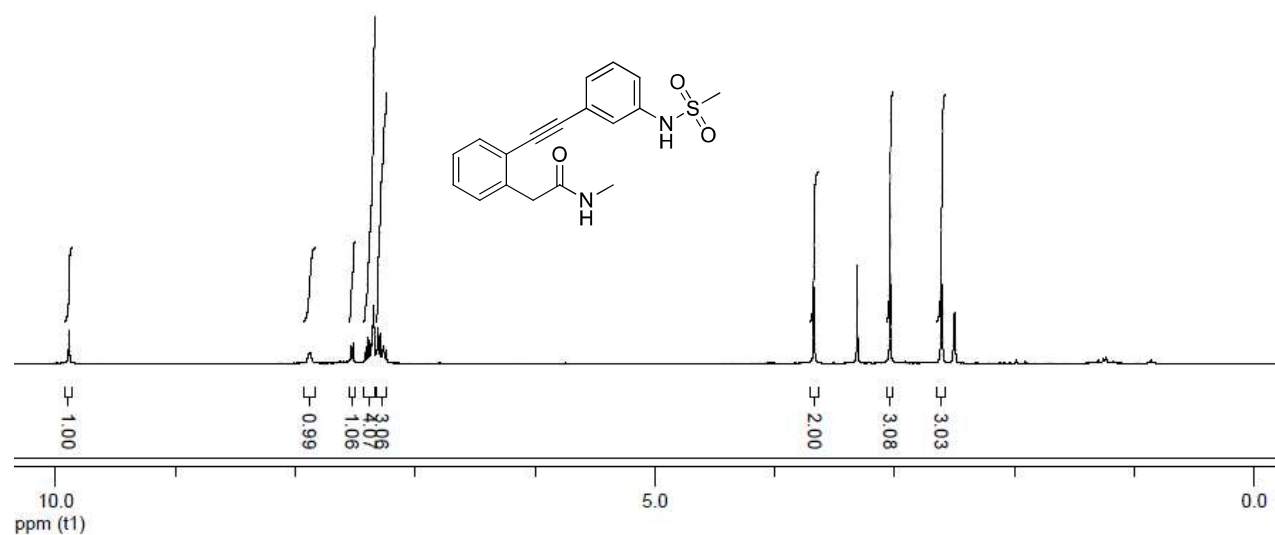

$^{13}\text{C}$  NMR spectrum (Varian, 100 MHz) of compound **2f** in  $\text{DMSO-}d_6$

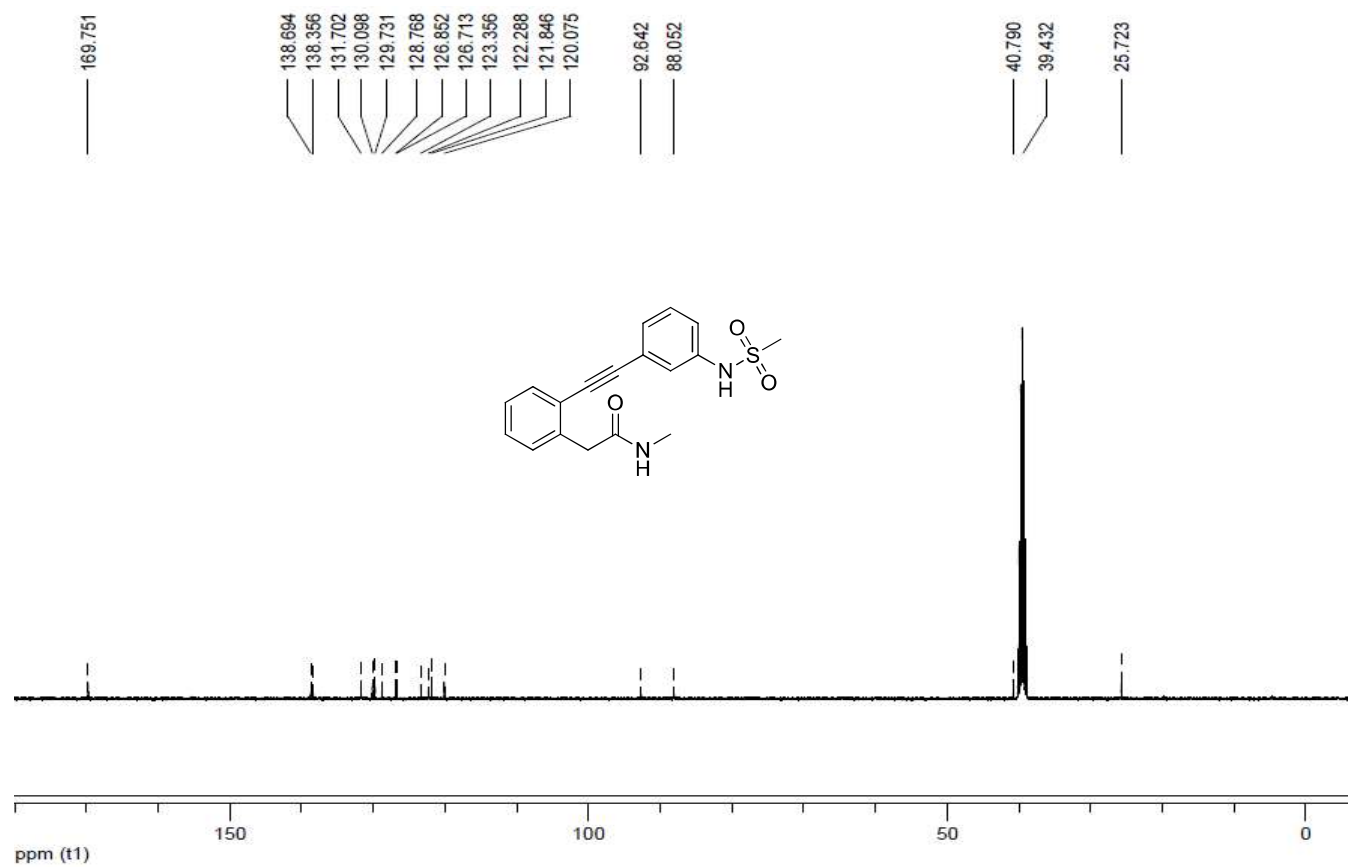

$^1\text{H}$  NMR (Varian, 400 MHz) spectrum of compound **2g** in  $\text{DMSO-}d_6$

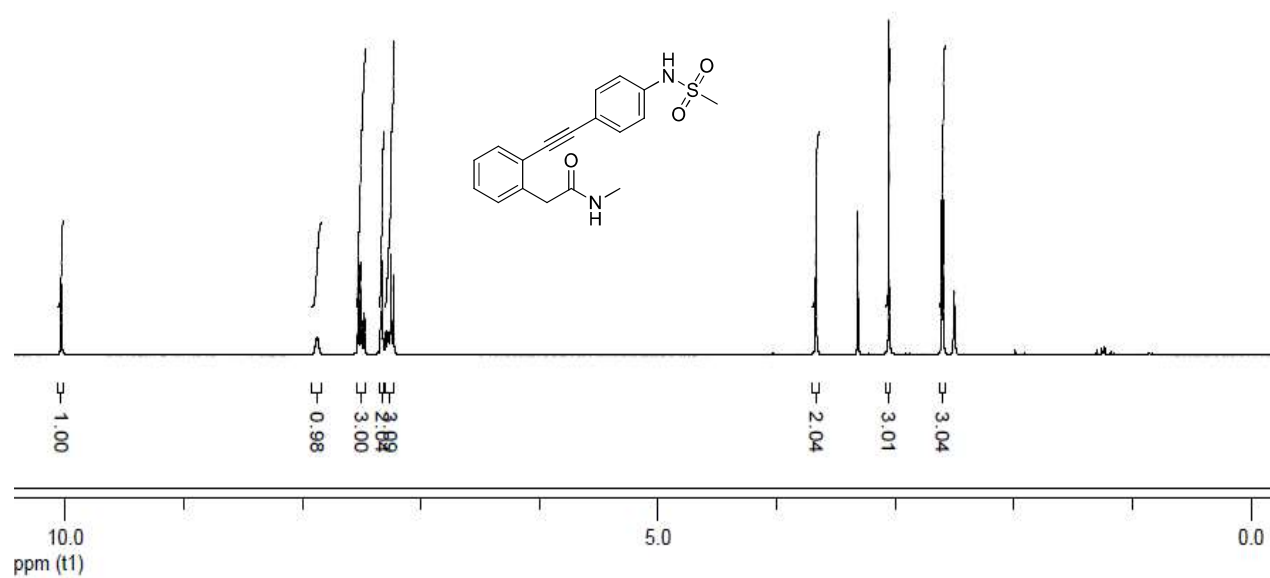

$^{13}\text{C}$  NMR spectrum (Varian, 100 MHz) of compound **2g** in  $\text{DMSO-}d_6$

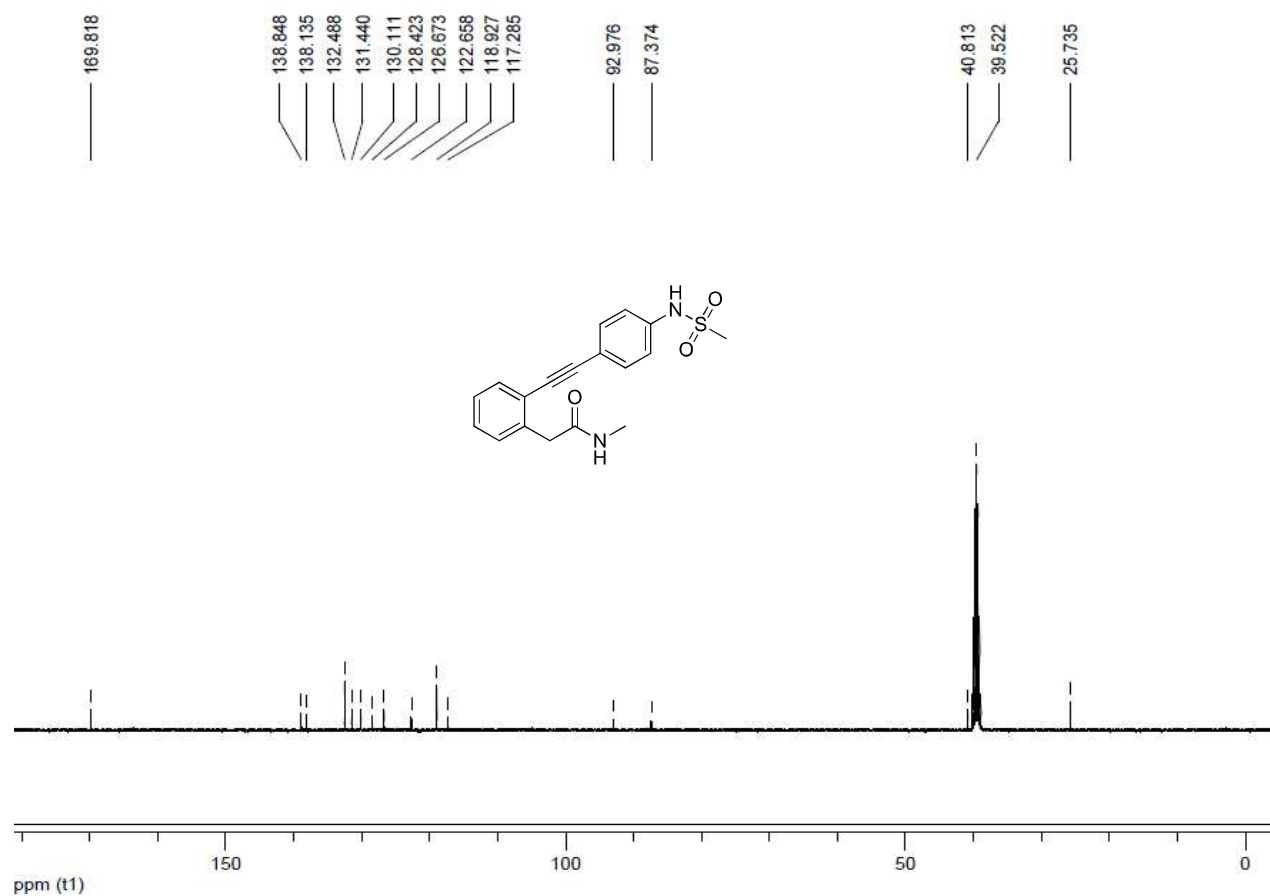

$^1\text{H}$  NMR (Varian, 400 MHz) spectrum of compound **2h** in  $\text{DMSO-}d_6$

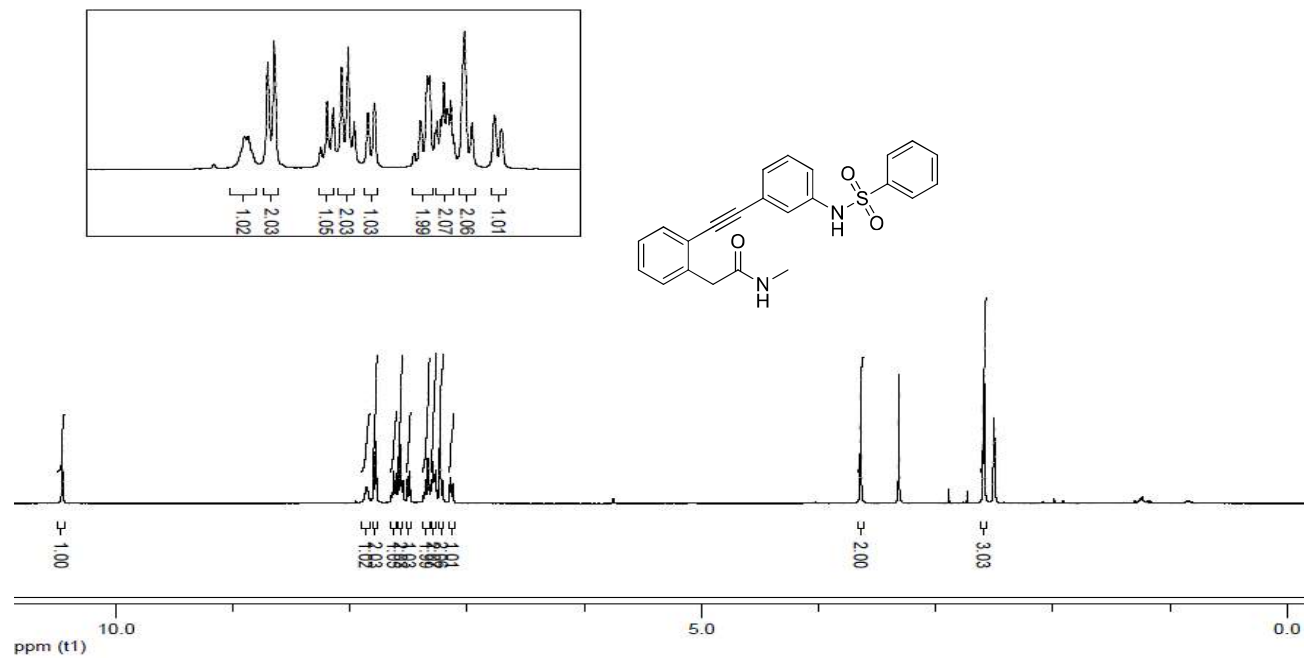

$^{13}\text{C}$  NMR spectrum (Varian, 100 MHz) of compound **2h** in  $\text{DMSO-}d_6$

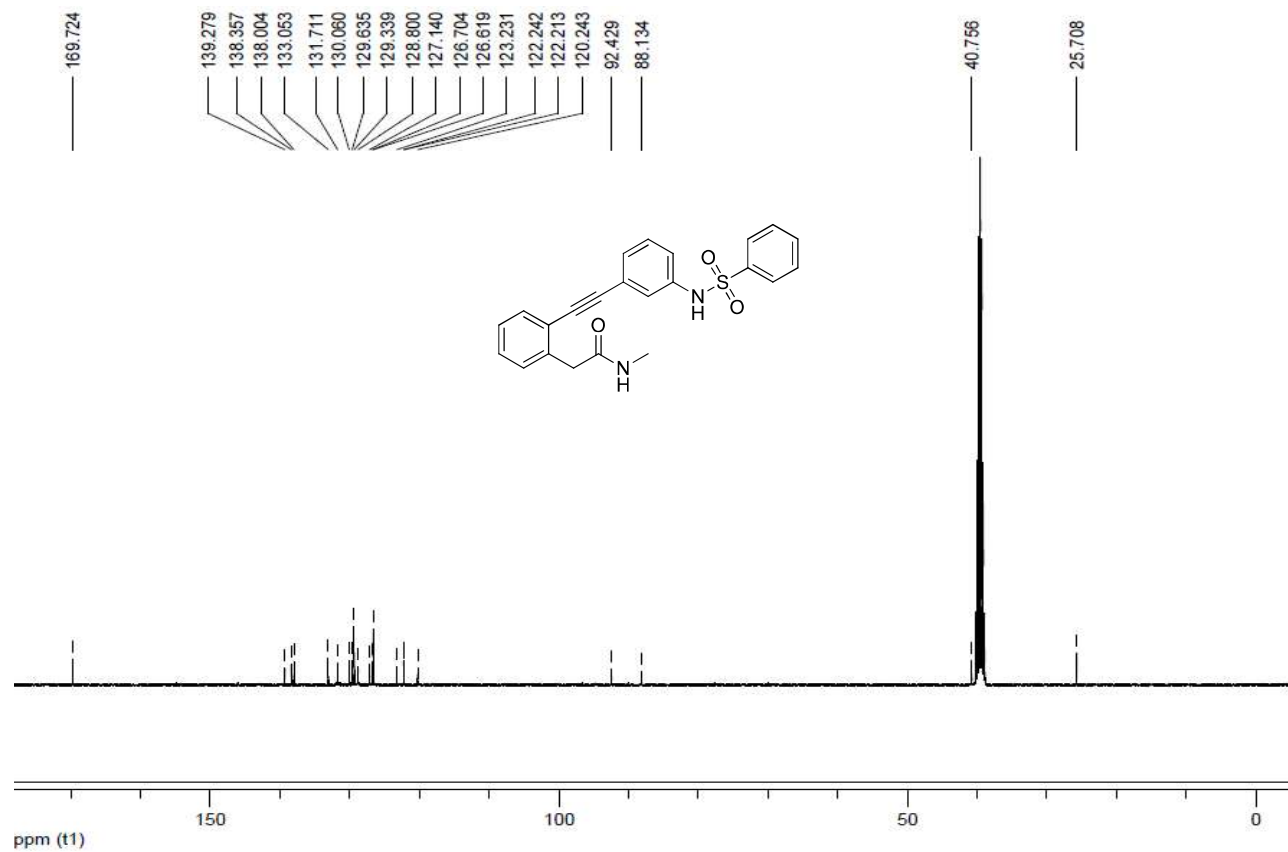

$^1\text{H}$  NMR (Varian, 400 MHz) spectrum of compound **2i** in  $\text{DMSO-}d_6$

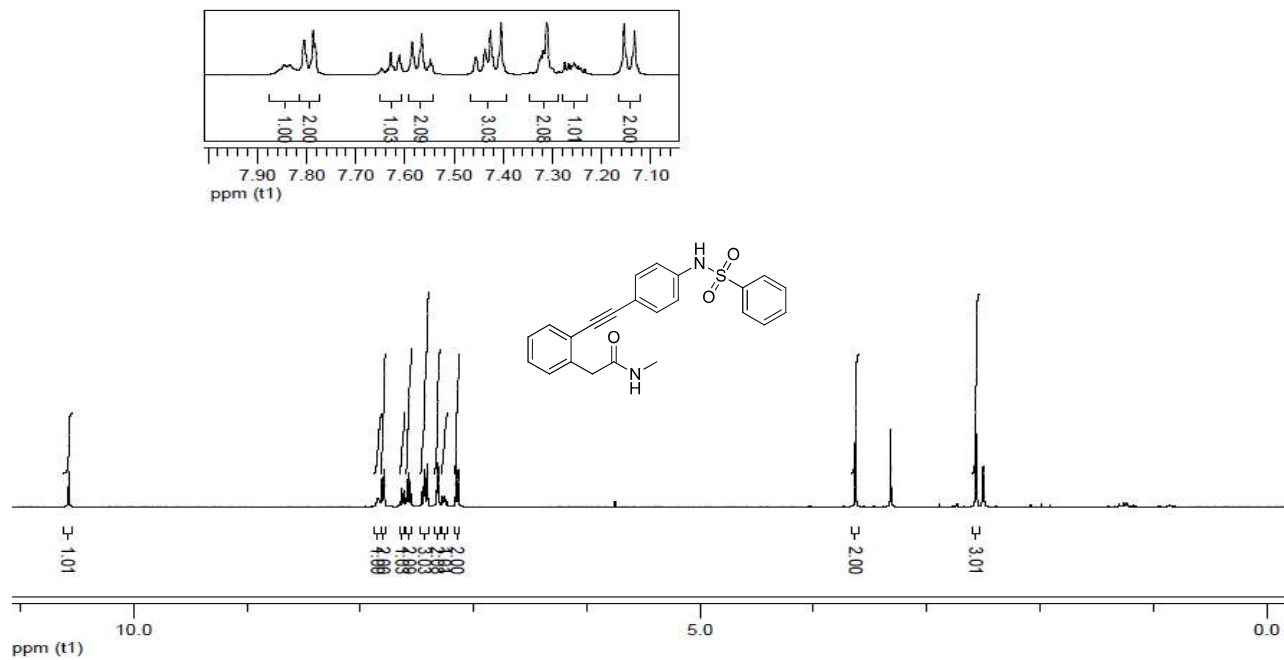

$^{13}\text{C}$  NMR spectrum (Varian, 100 MHz) of compound **2i** in  $\text{DMSO-}d_6$

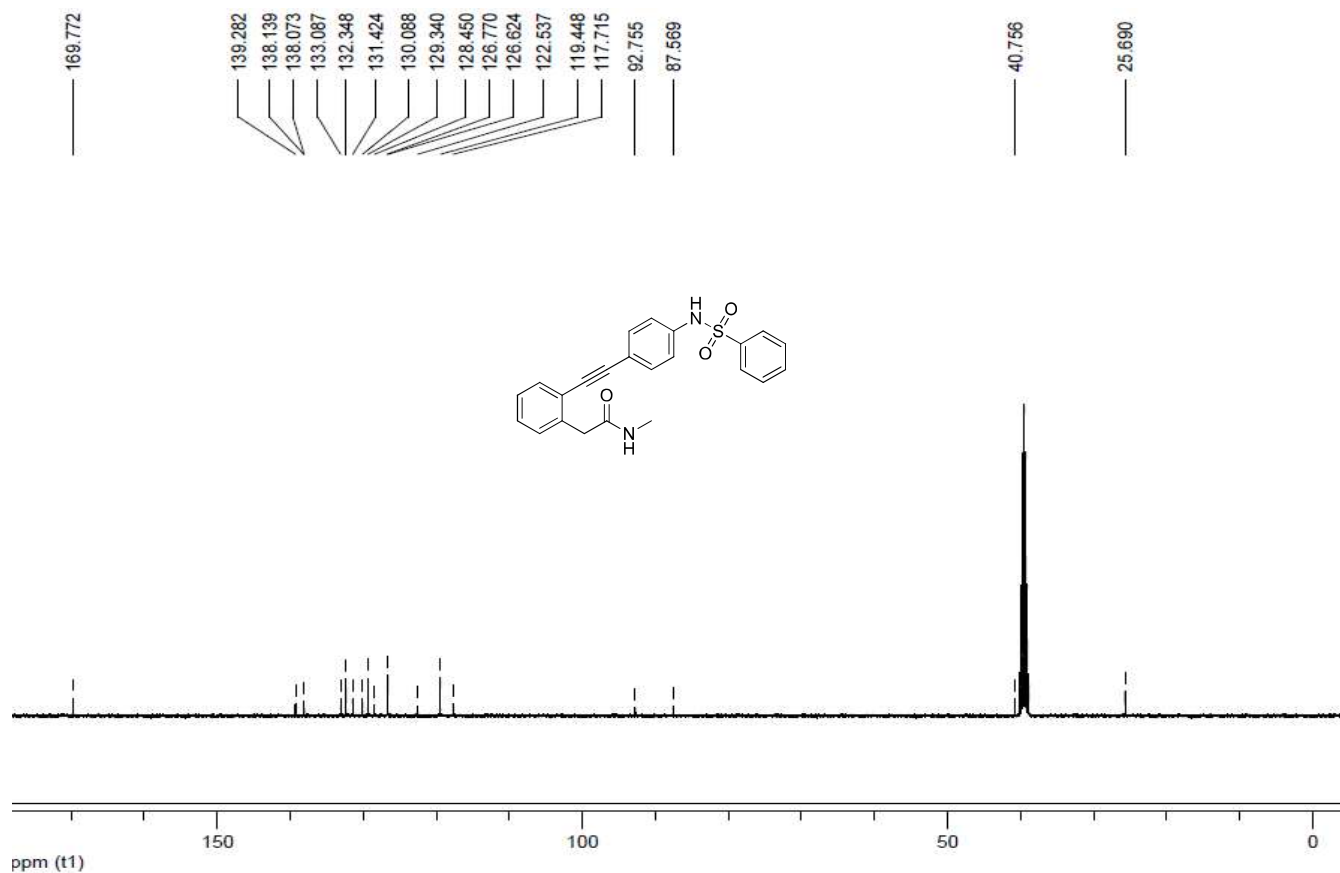

$^1\text{H}$  NMR (Varian, 400 MHz) spectrum of compound **2j** in  $\text{DMSO-}d_6$

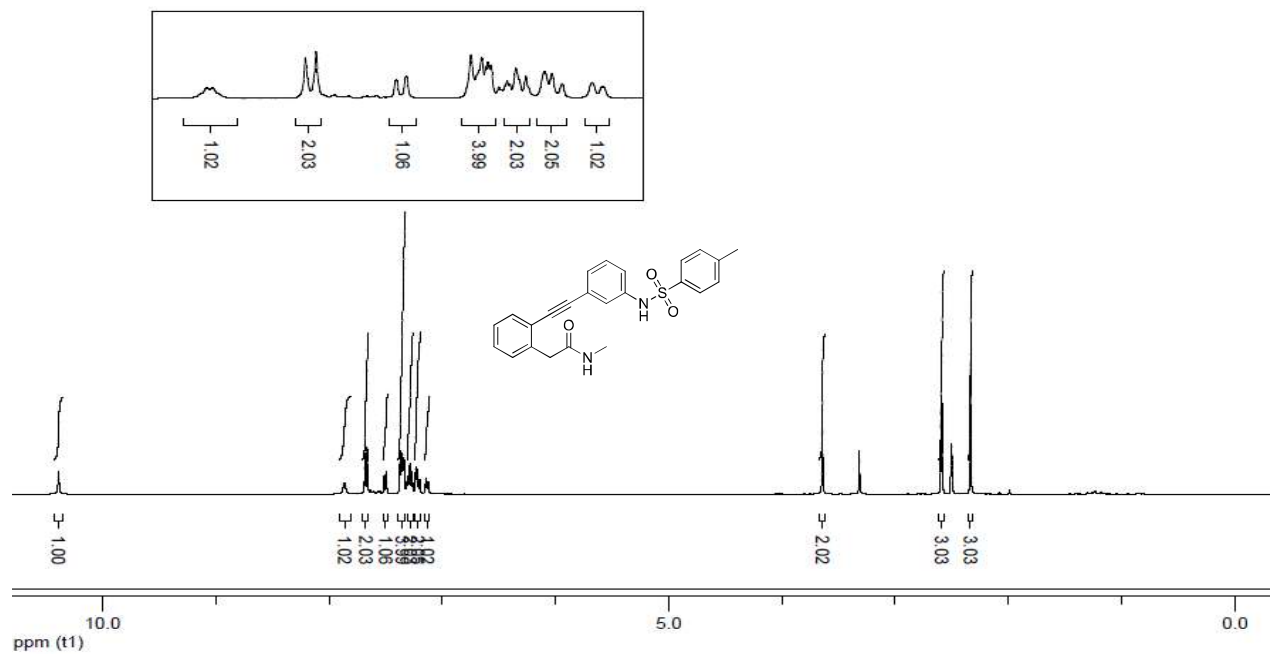

$^{13}\text{C}$  NMR spectrum (Varian, 100 MHz) of compound **2j** in  $\text{DMSO-}d_6$

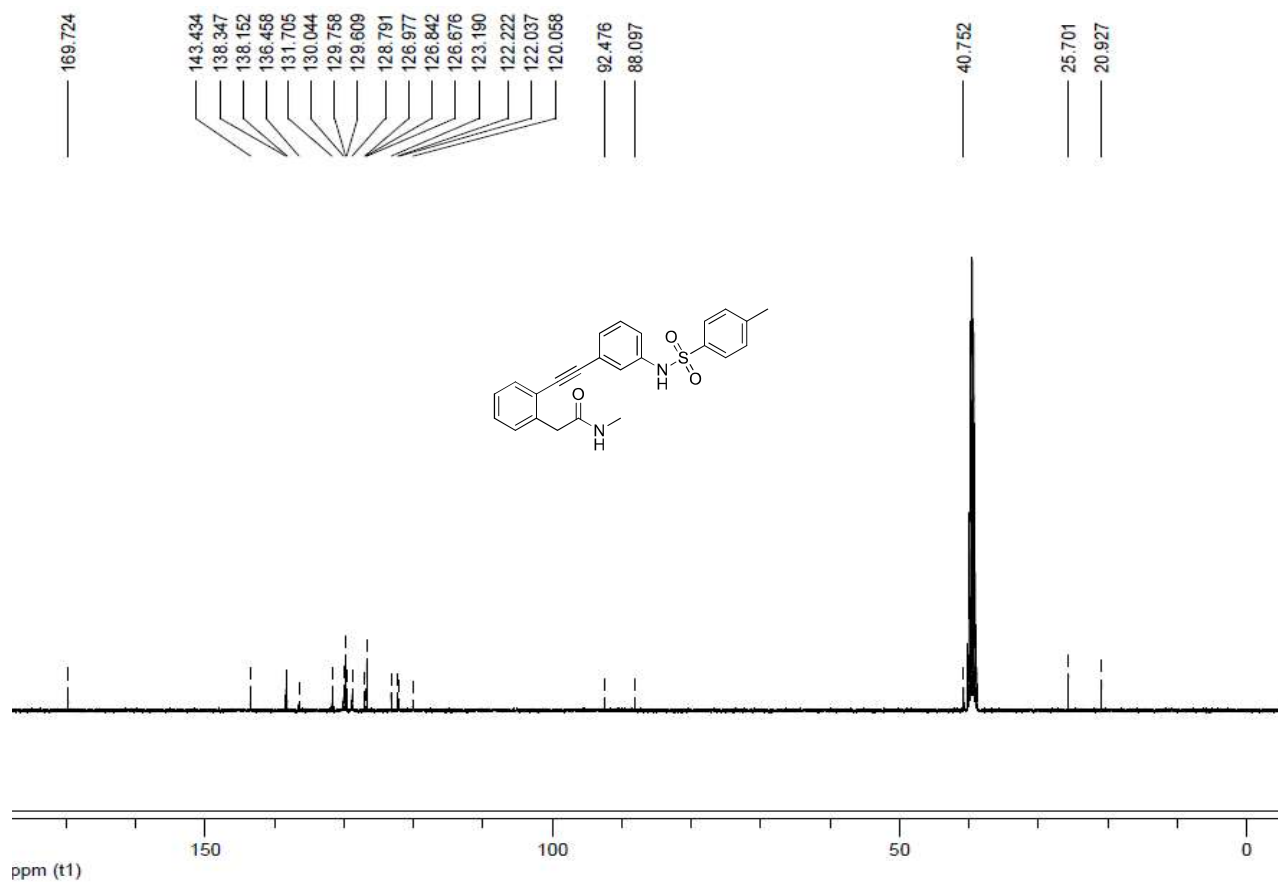



$^1\text{H}$  NMR (Varian, 400 MHz) spectrum of compound **2k** in  $\text{DMSO-}d_6$

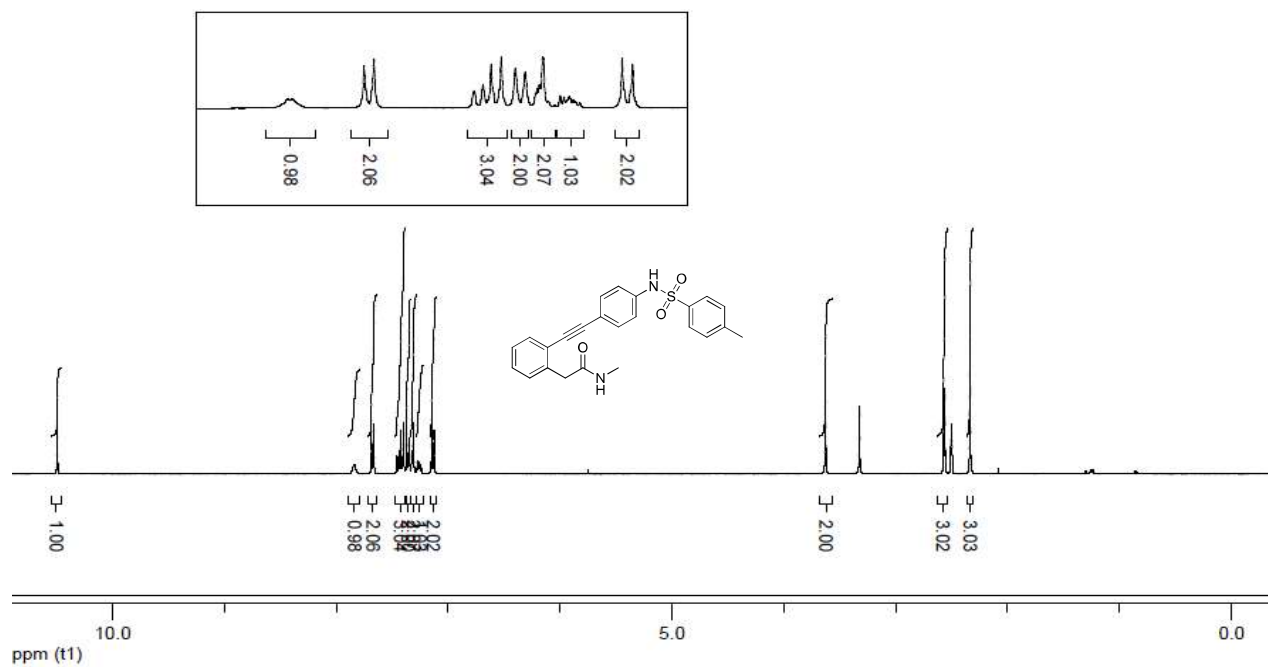

$^{13}\text{C}$  NMR spectrum (Varian, 100 MHz) of compound **2k** in  $\text{DMSO-}d_6$

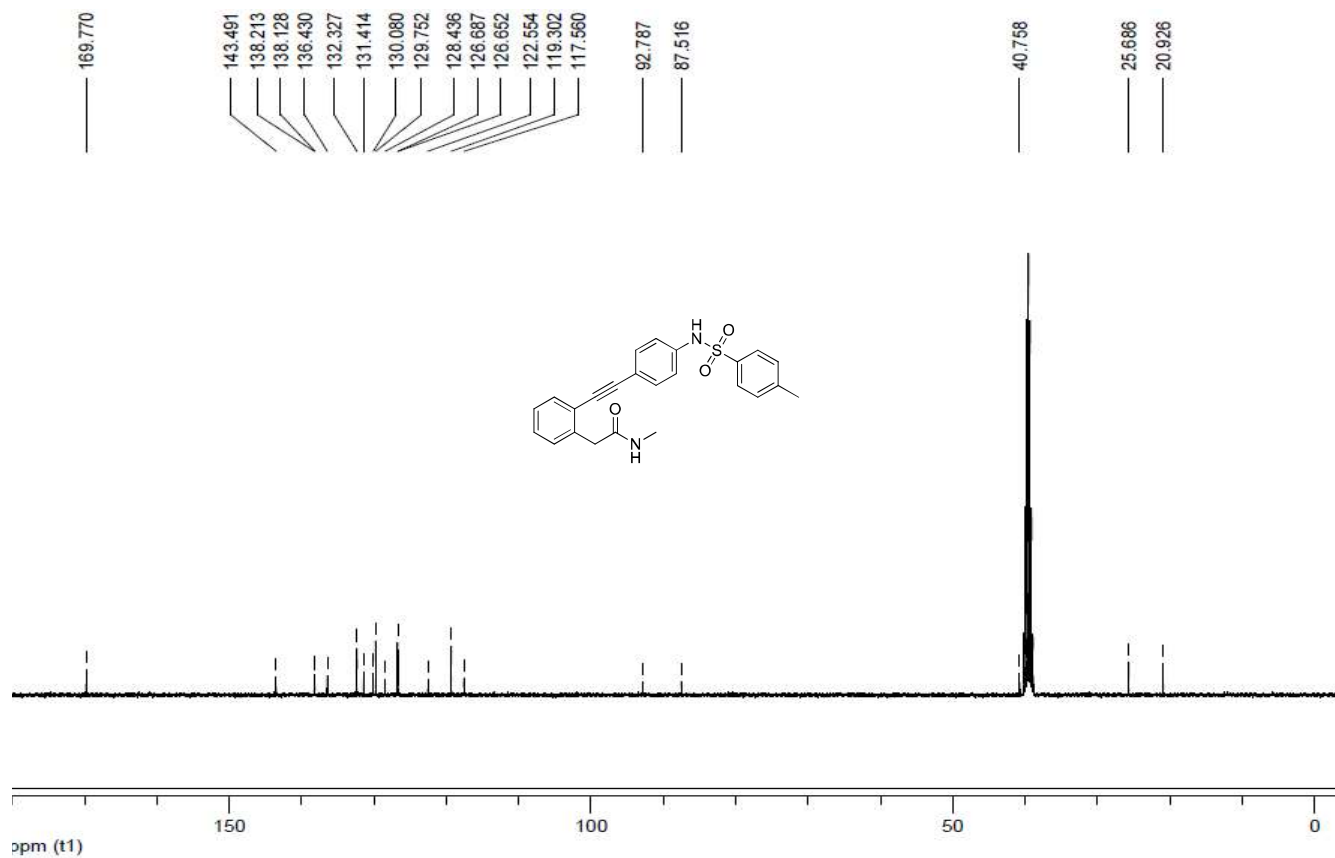



$^1\text{H}$  NMR (Varian, 400 MHz) spectrum of compound **2m** in  $\text{DMSO-}d_6$

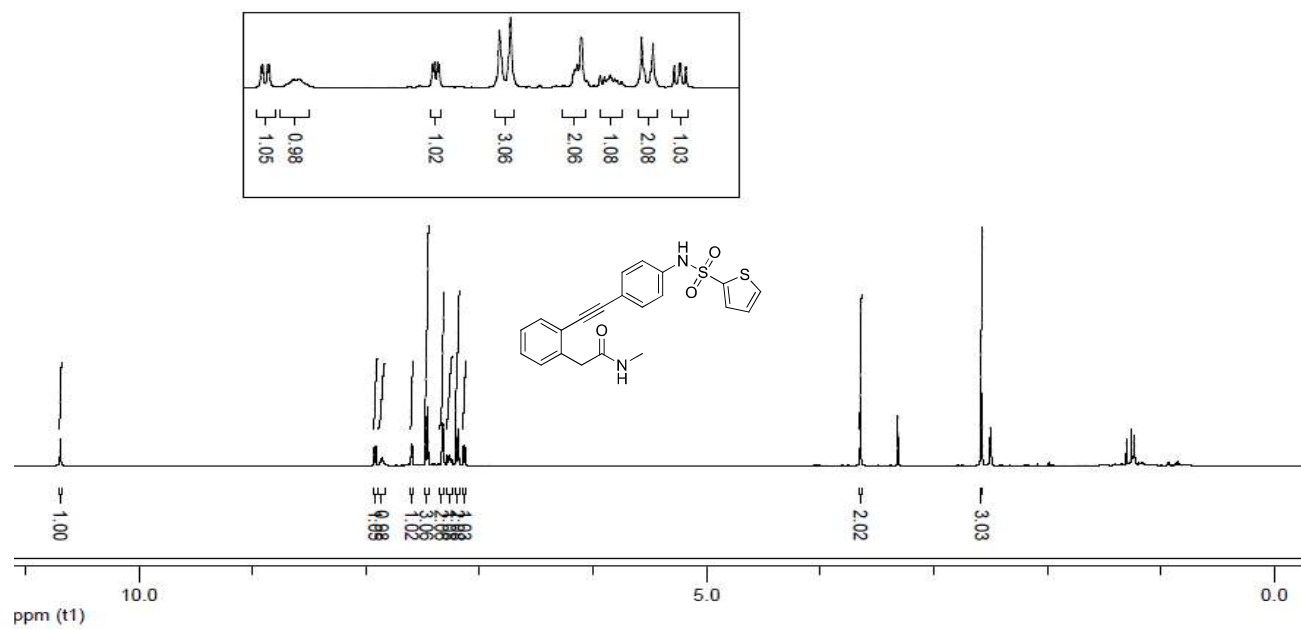

$^{13}\text{C}$  NMR spectrum (Varian, 100 MHz) of compound **2m** in  $\text{DMSO-}d_6$

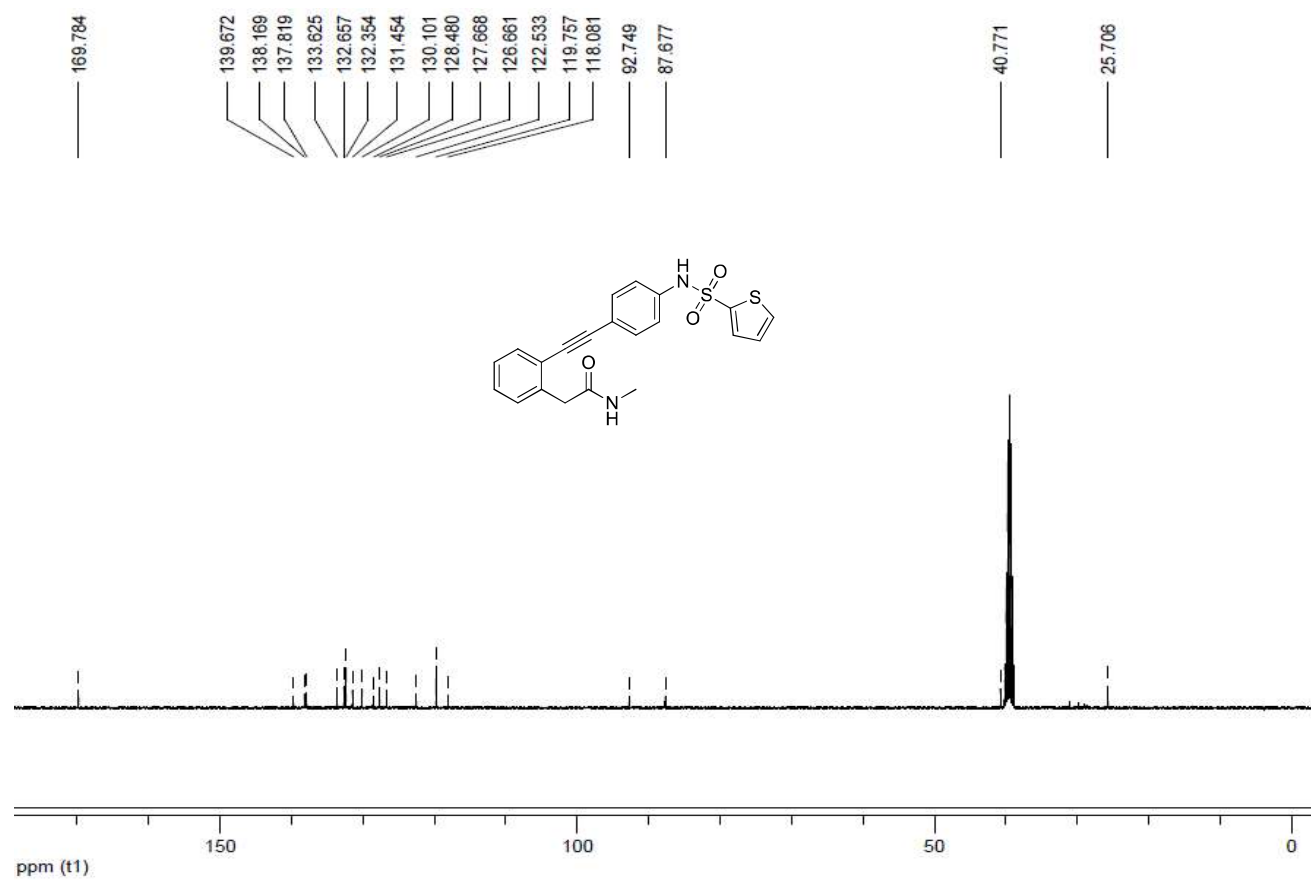

$^1\text{H}$  NMR (Varian, 400 MHz) spectrum of compound **2n** in  $\text{DMSO-}d_6$

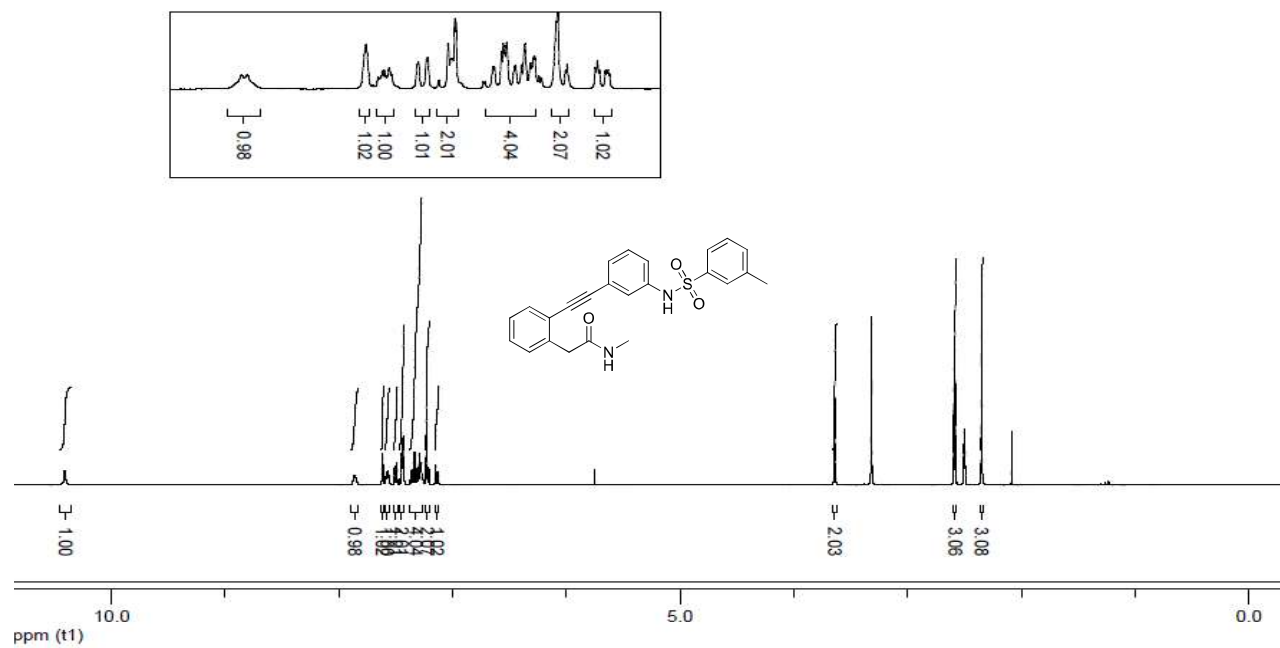

$^{13}\text{C}$  NMR spectrum (Varian, 100 MHz) of compound **2n** in  $\text{DMSO-}d_6$

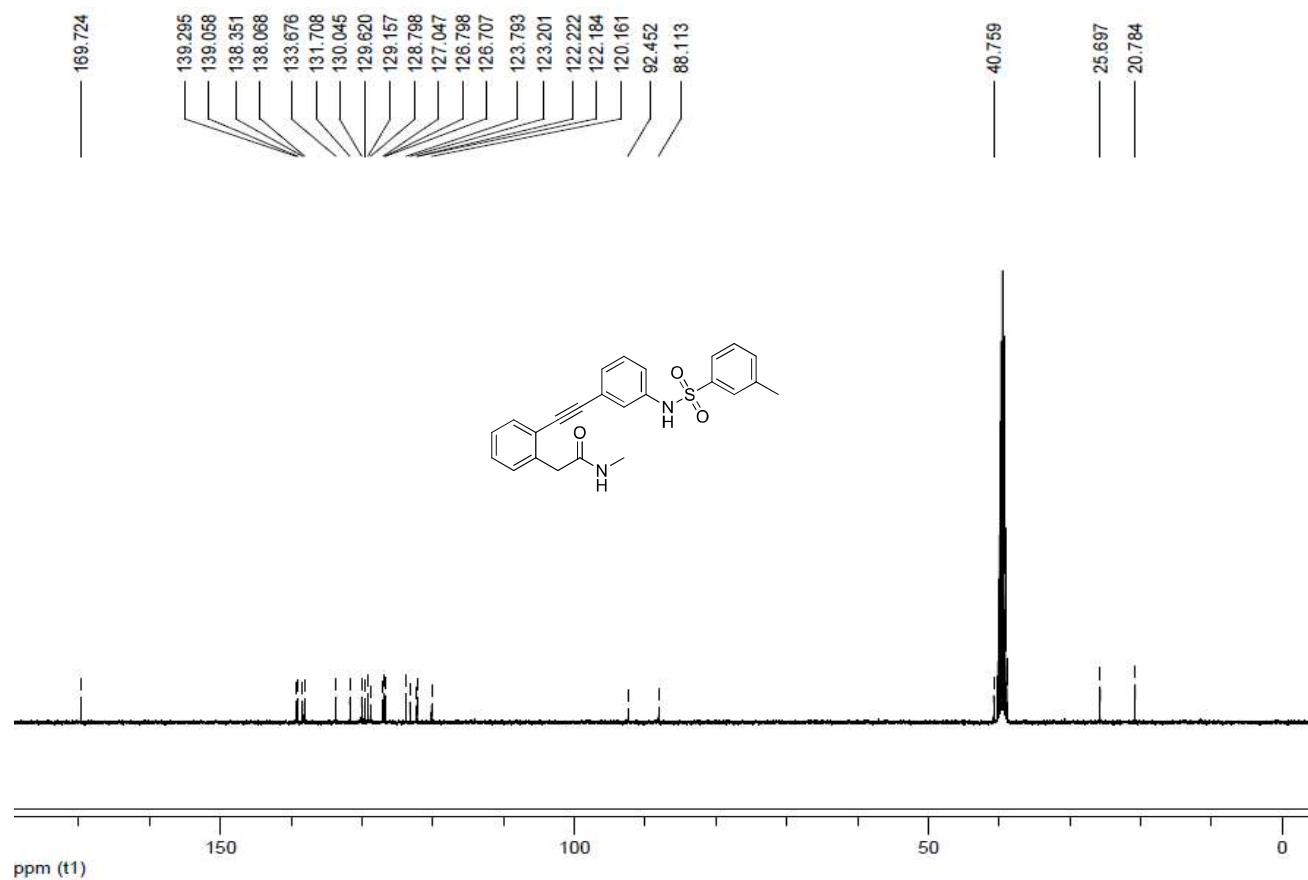

$^1\text{H}$  NMR (Varian, 400 MHz) spectrum of compound **3a** in  $\text{CDCl}_3$

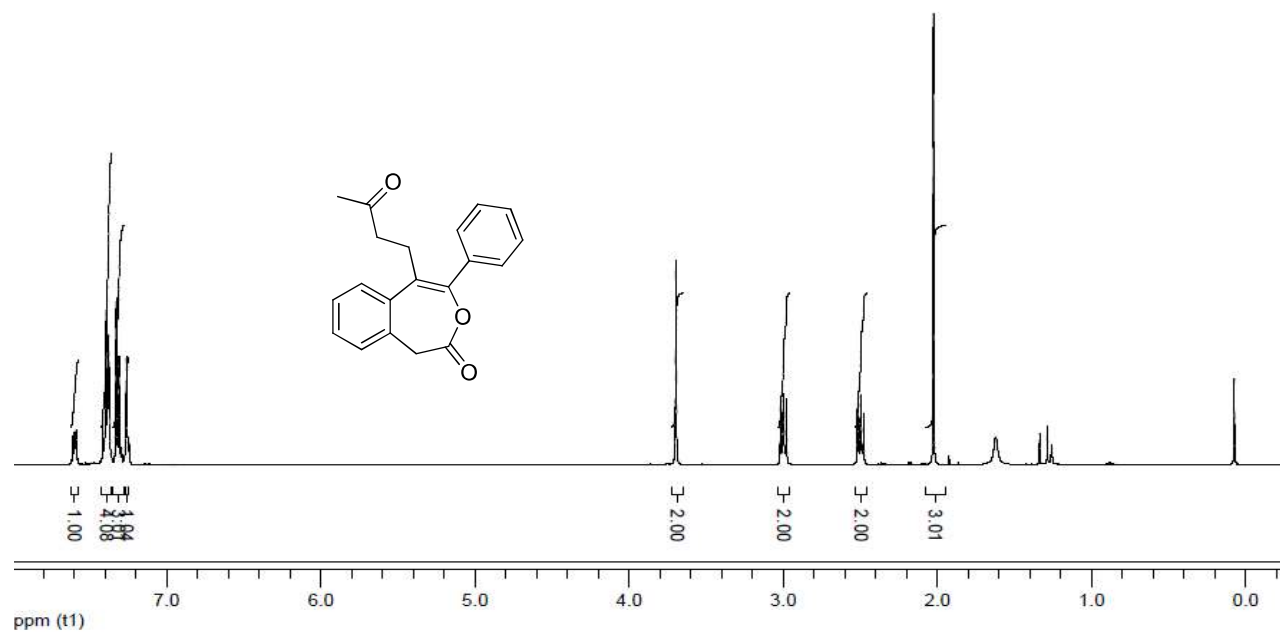

$^{13}\text{C}$  NMR spectrum (Varian, 100 MHz) of compound **3a** in  $\text{CDCl}_3$

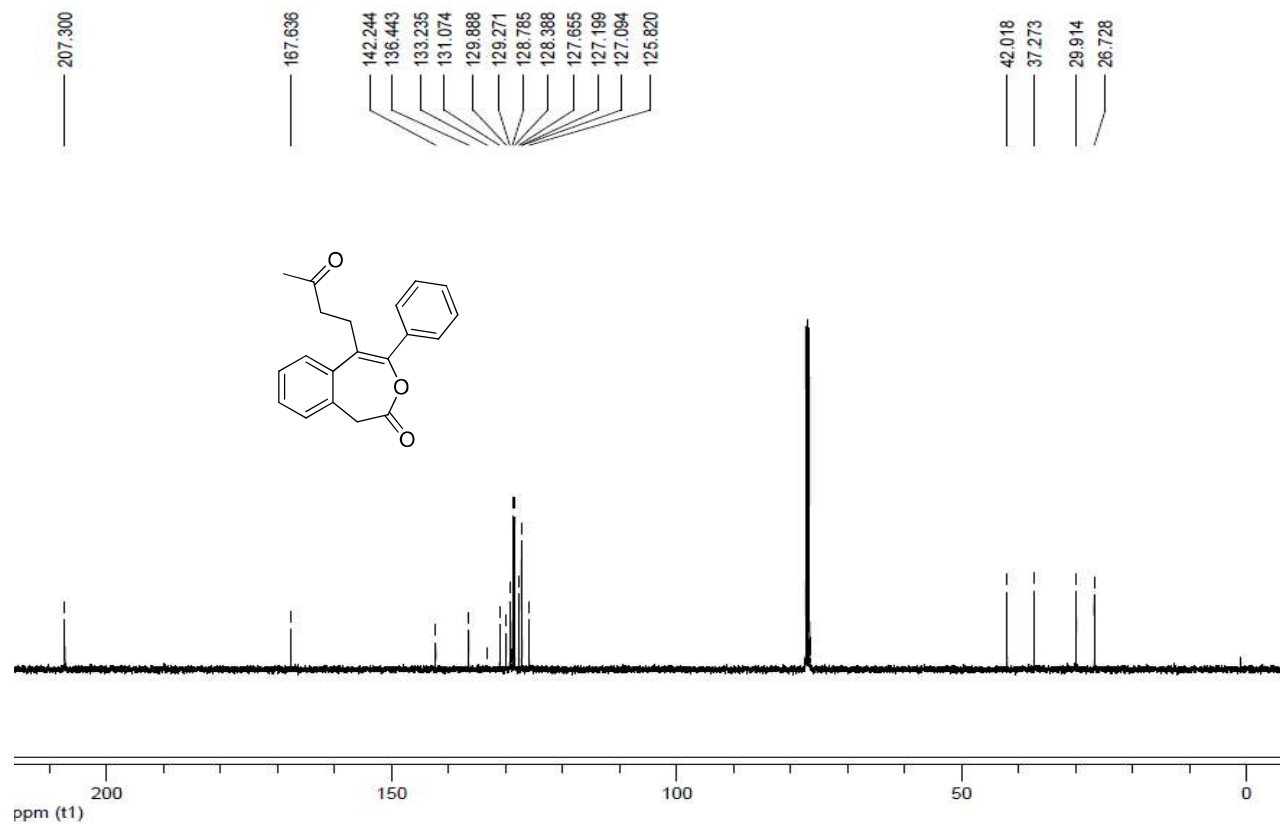

$^1\text{H}$  NMR (Varian, 400 MHz) spectrum of compound **3b** in  $\text{DMSO-}d_6$

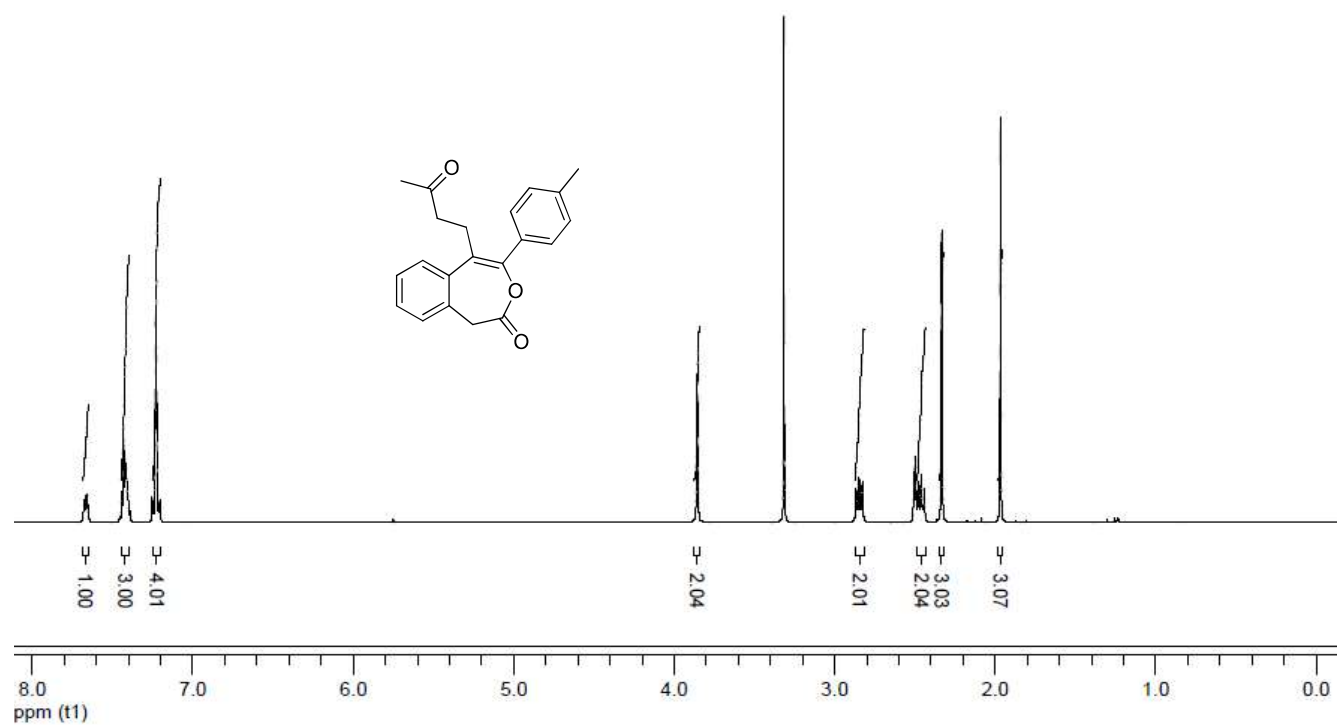

$^{13}\text{C}$  NMR spectrum (Varian, 100 MHz) of compound **3b** in  $\text{DMSO-}d_6$

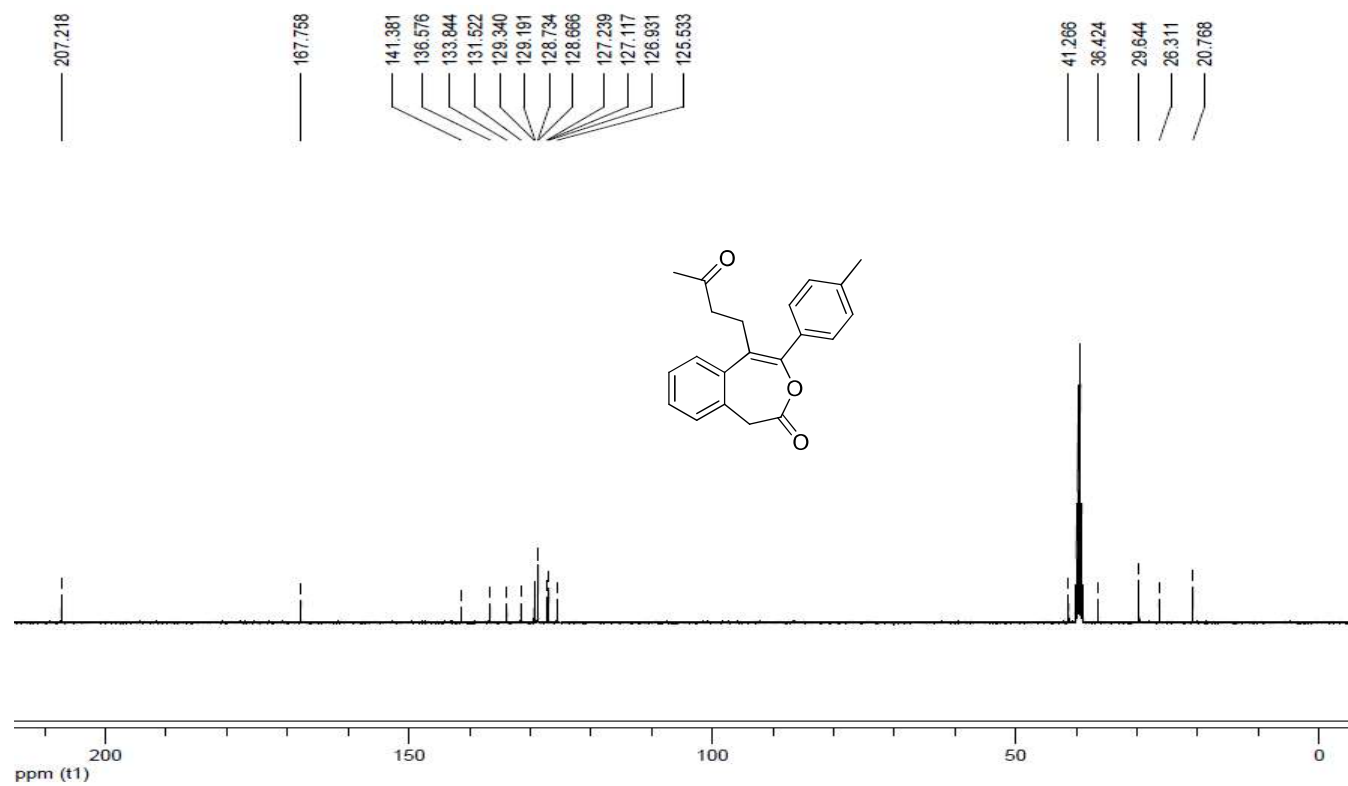

$^1\text{H}$  NMR (Varian, 400 MHz) spectrum of compound **3bb** in  $\text{DMSO-}d_6$

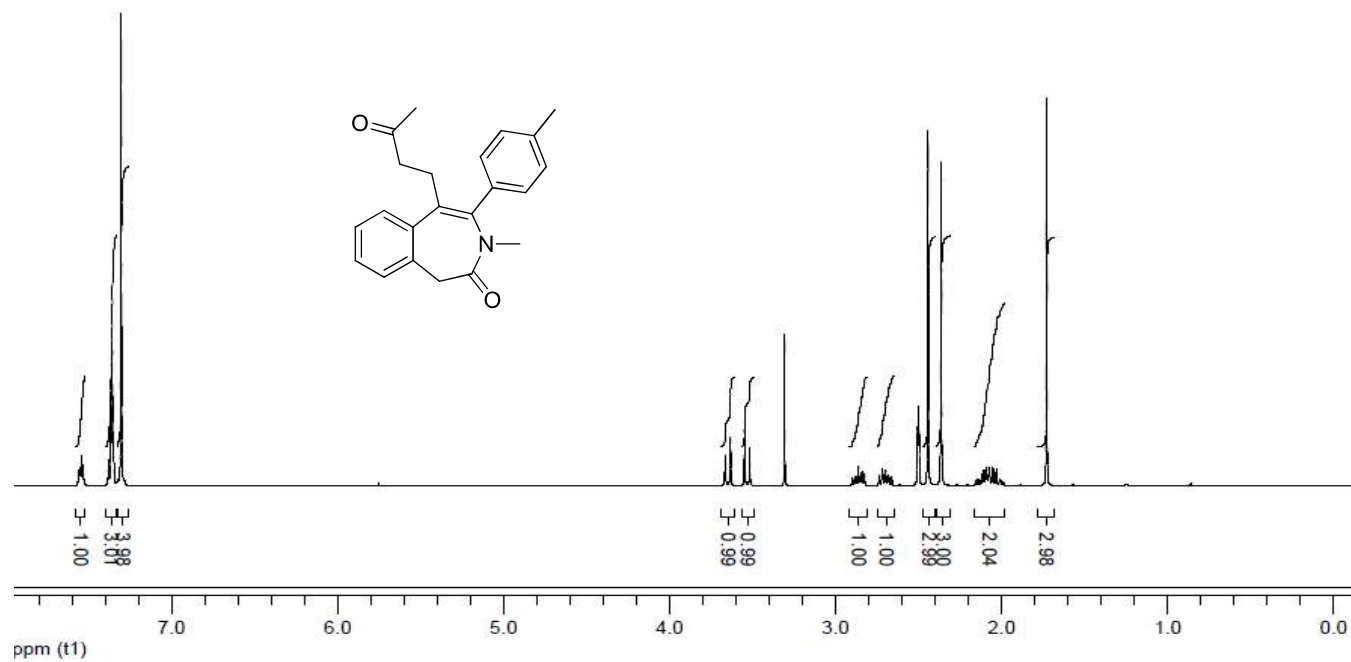

$^{13}\text{C}$  NMR spectrum (Varian, 100 MHz) of compound **3bb** in  $\text{DMSO-}d_6$

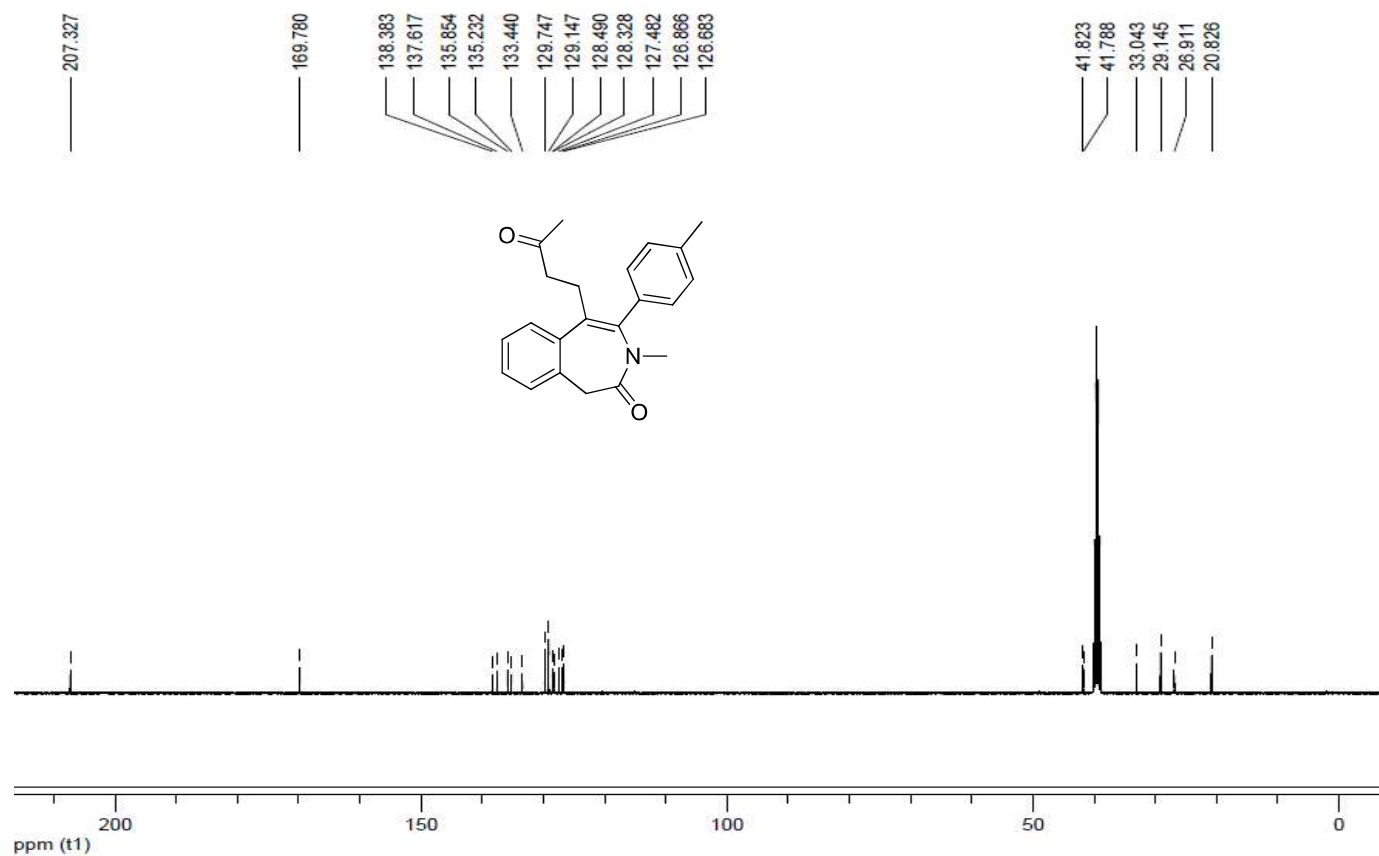

$^1\text{H}$  NMR (Varian, 400 MHz) spectrum of compound **3c** in  $\text{DMSO-}d_6$

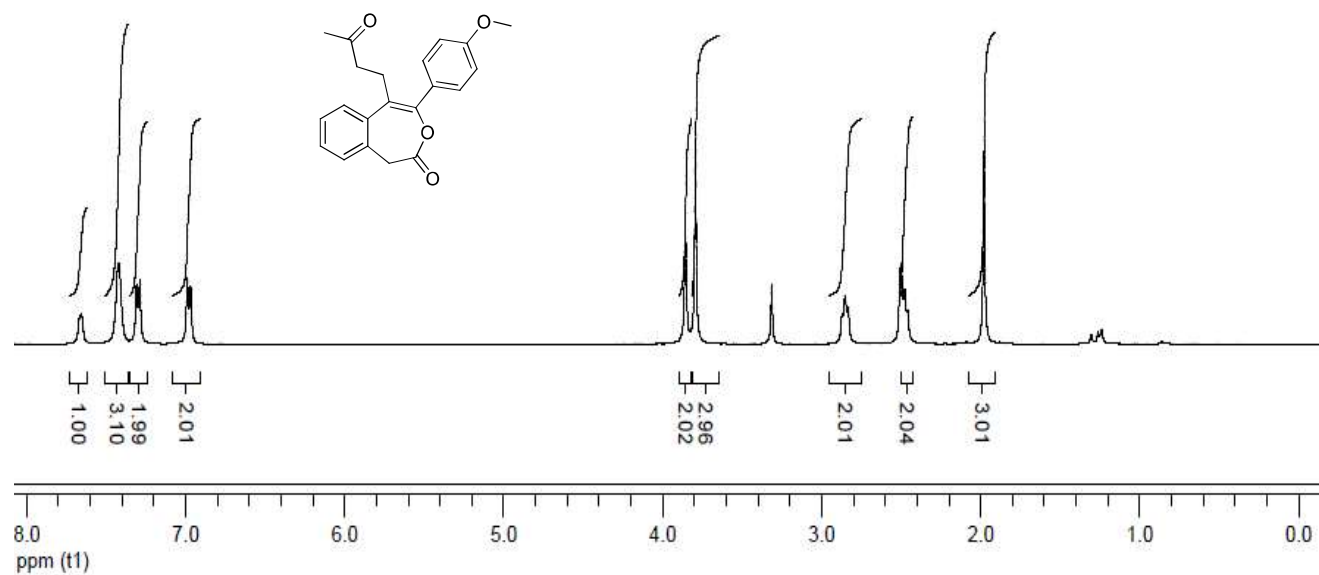

$^{13}\text{C}$  NMR spectrum (Varian, 100 MHz) of compound **3c** in  $\text{DMSO-}d_6$

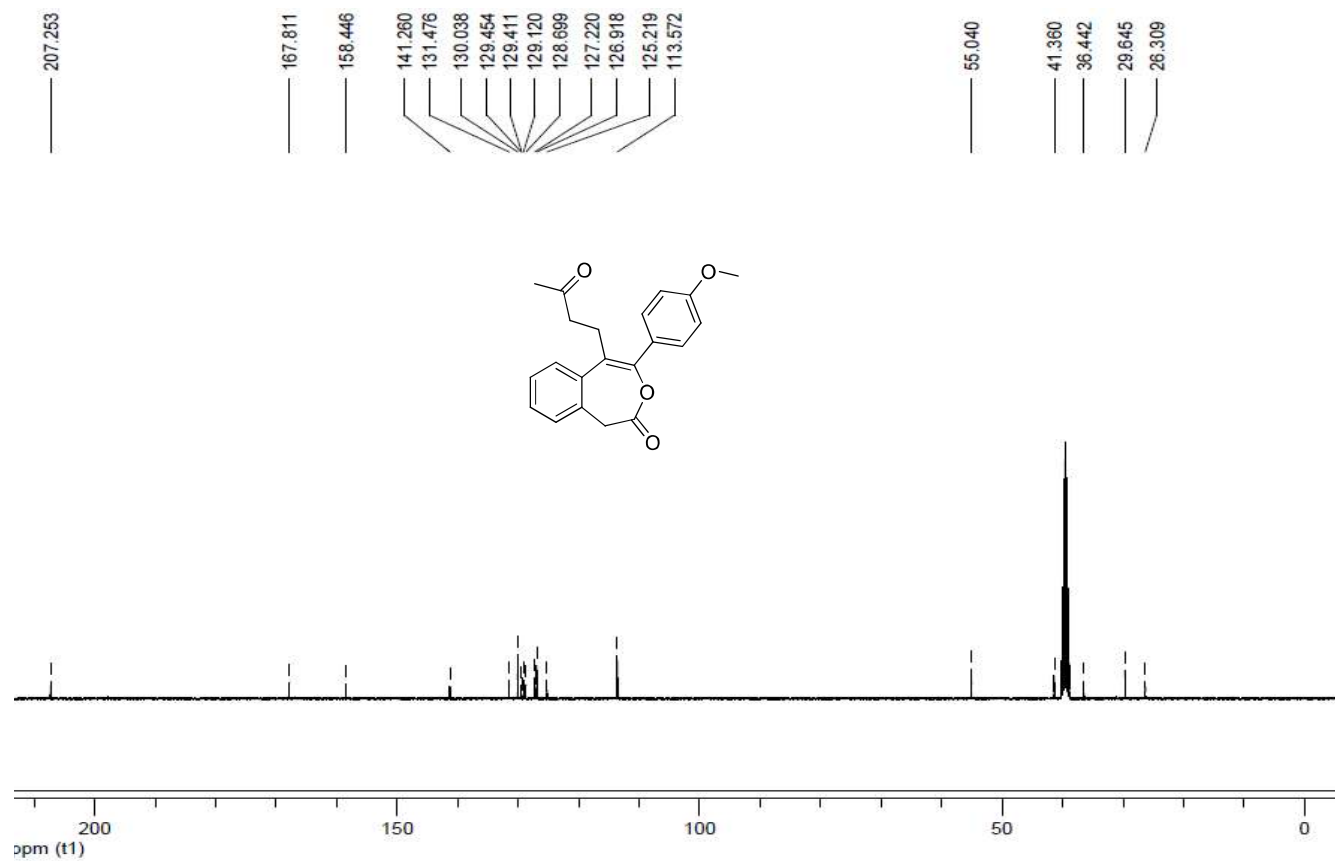



$^1\text{H}$  NMR (Varian, 400 MHz) spectrum of compound **3d** in  $\text{DMSO-}d_6$

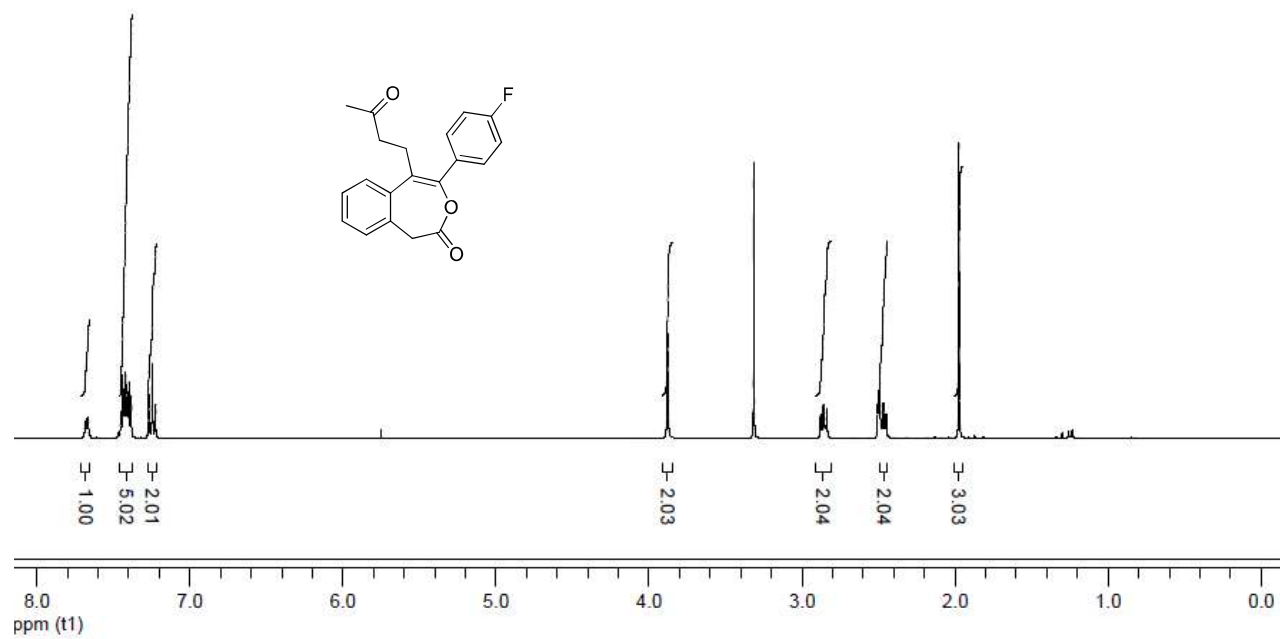

$^{13}\text{C}$  NMR spectrum (Varian, 100 MHz) of compound **3d** in  $\text{DMSO-}d_6$

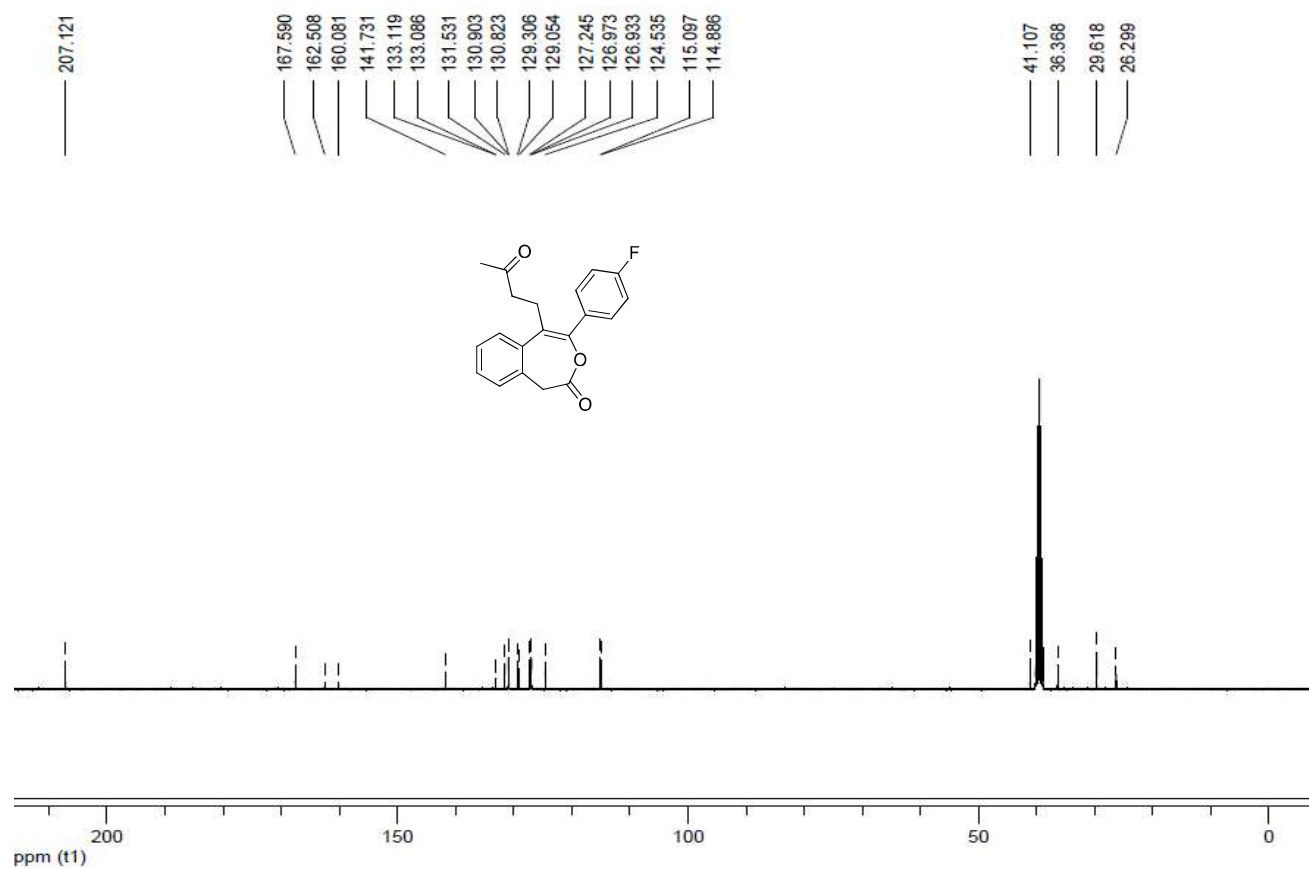

$^1\text{H}$  NMR (Varian, 400 MHz) spectrum of compound **3e** in  $\text{DMSO-}d_6$

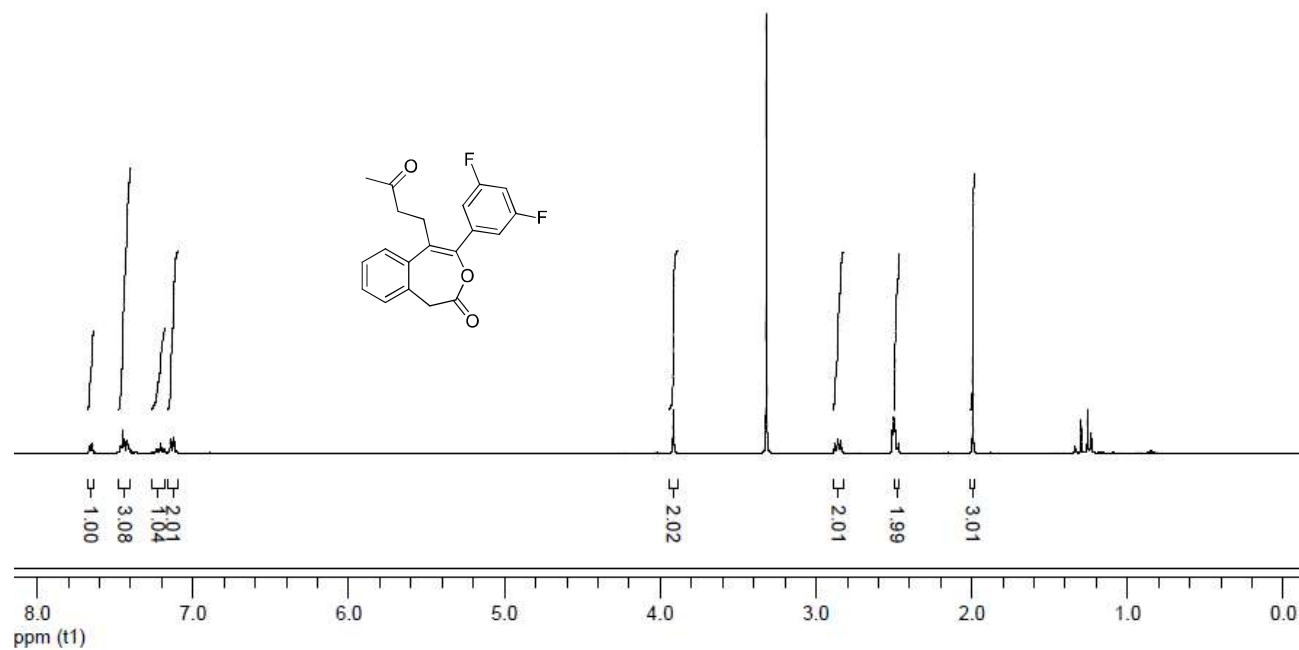

$^{13}\text{C}$  NMR spectrum (Varian, 100 MHz) of compound **3e** in  $\text{DMSO-}d_6$

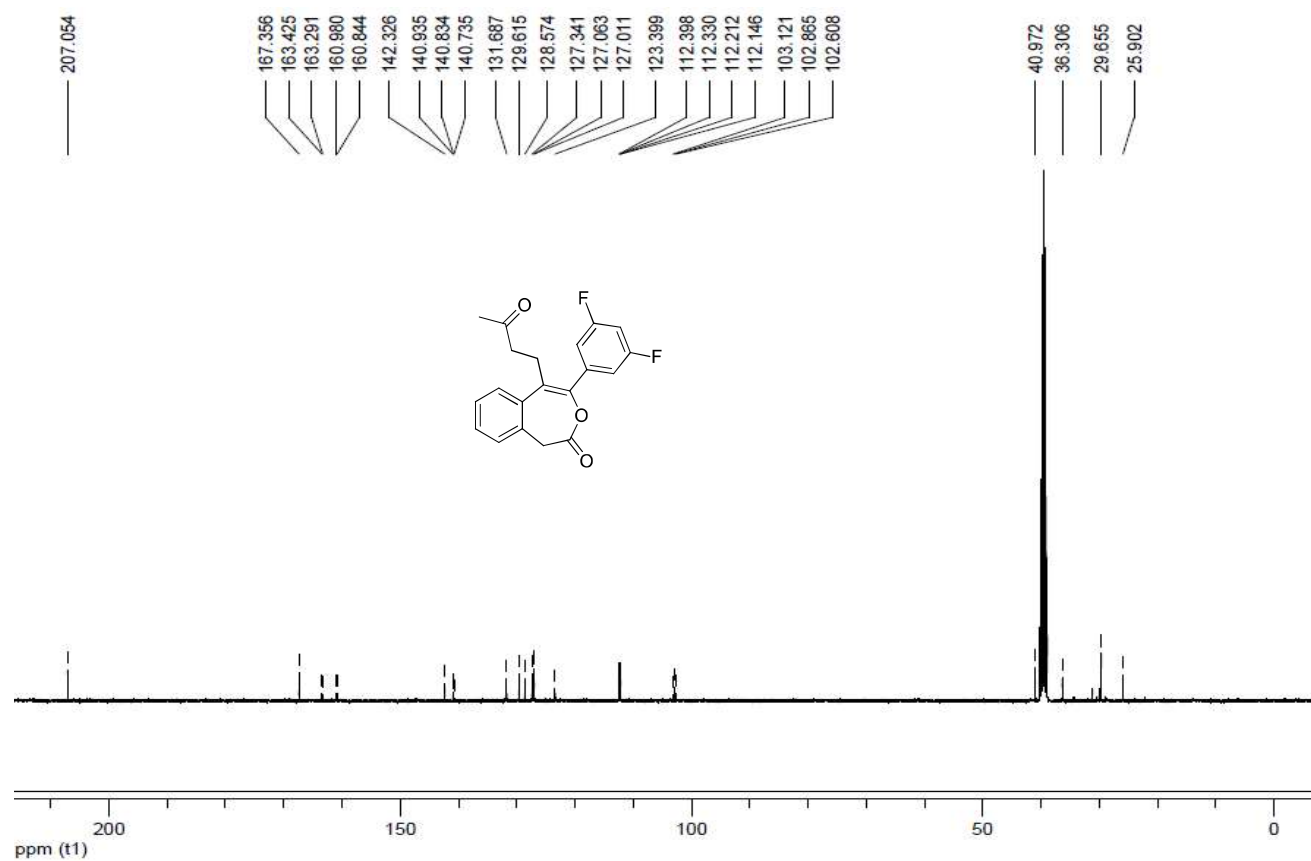

$^1\text{H}$  NMR (Varian, 400 MHz) spectrum of compound **3f** in  $\text{DMSO-}d_6$

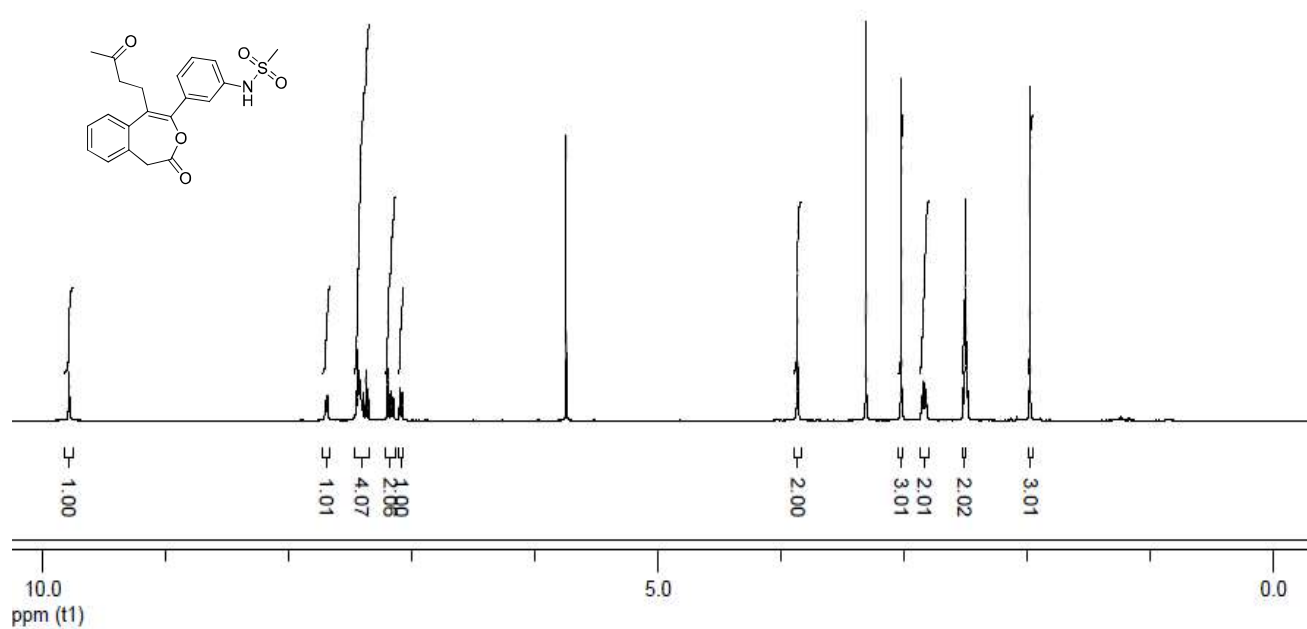

$^{13}\text{C}$  NMR spectrum (Varian, 100 MHz) of compound **3f** in  $\text{DMSO-}d_6$

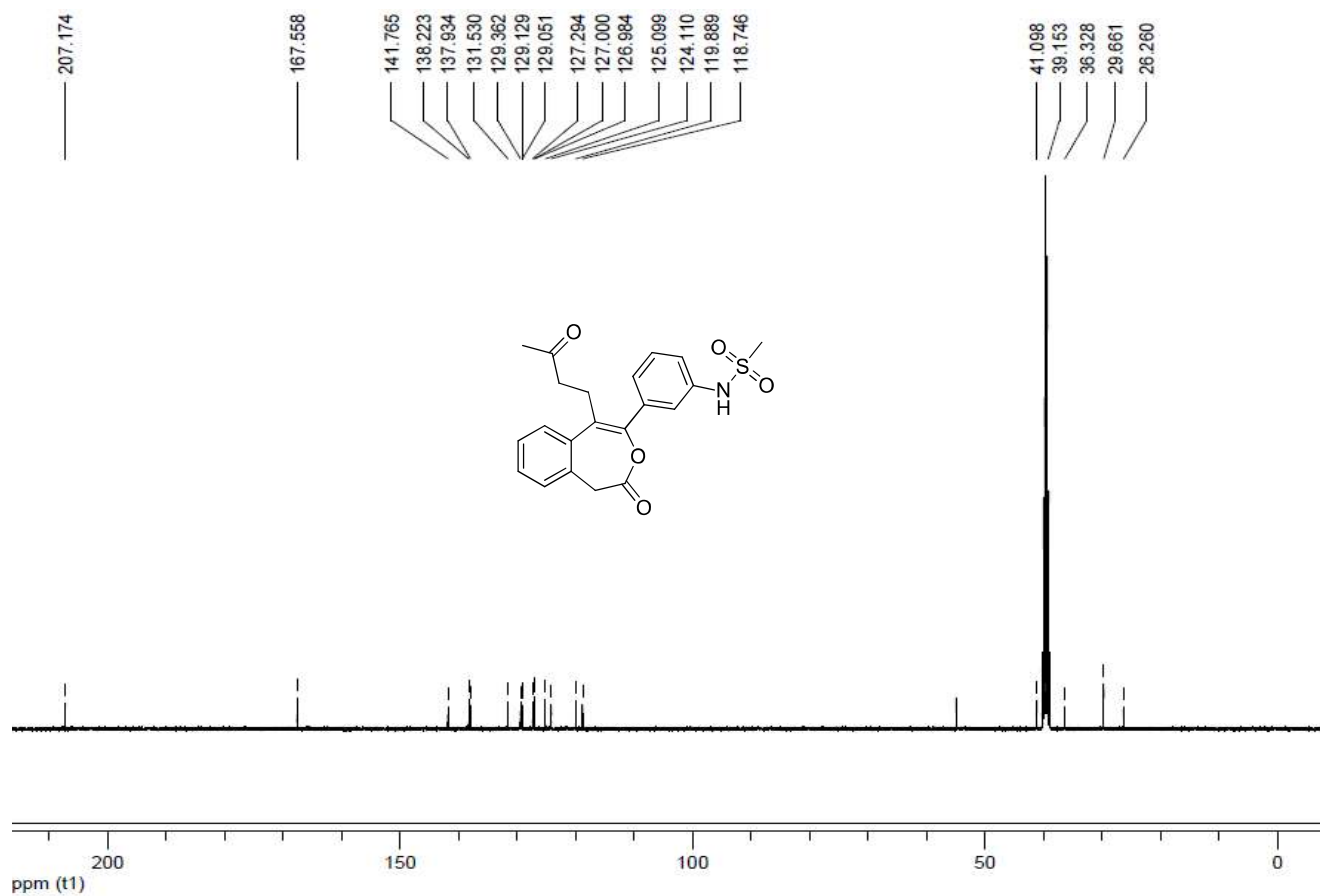

$^1\text{H}$  NMR (Varian, 400 MHz) spectrum of compound **3g** in  $\text{DMSO-}d_6$

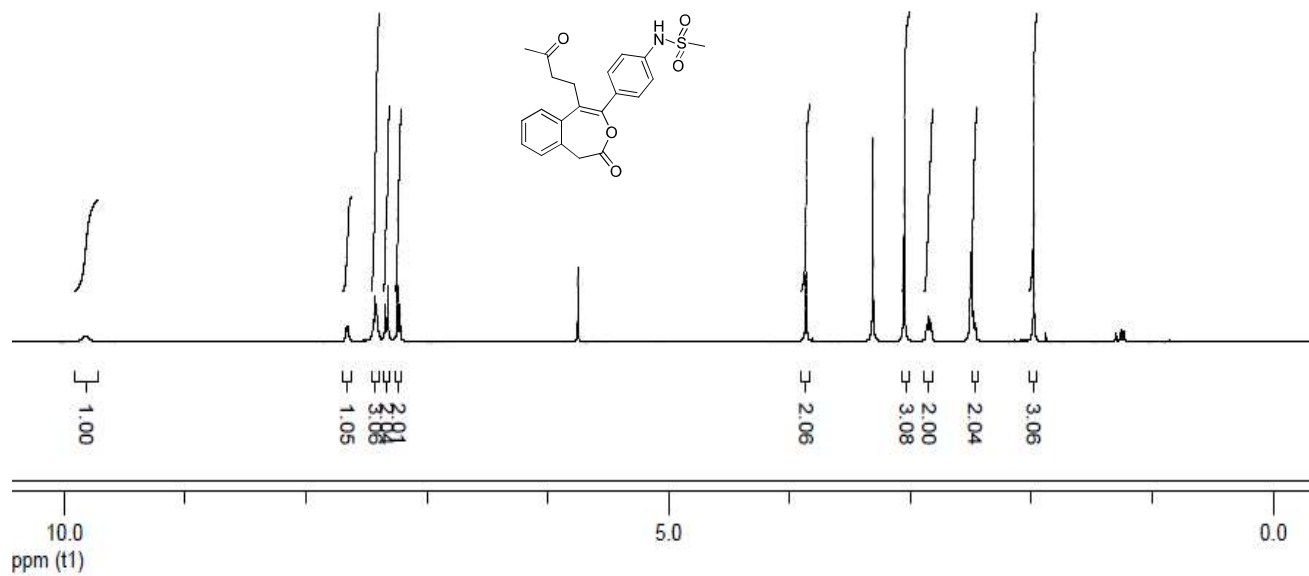

$^{13}\text{C}$  NMR spectrum (Varian, 100 MHz) of compound **3g** in  $\text{DMSO-}d_6$

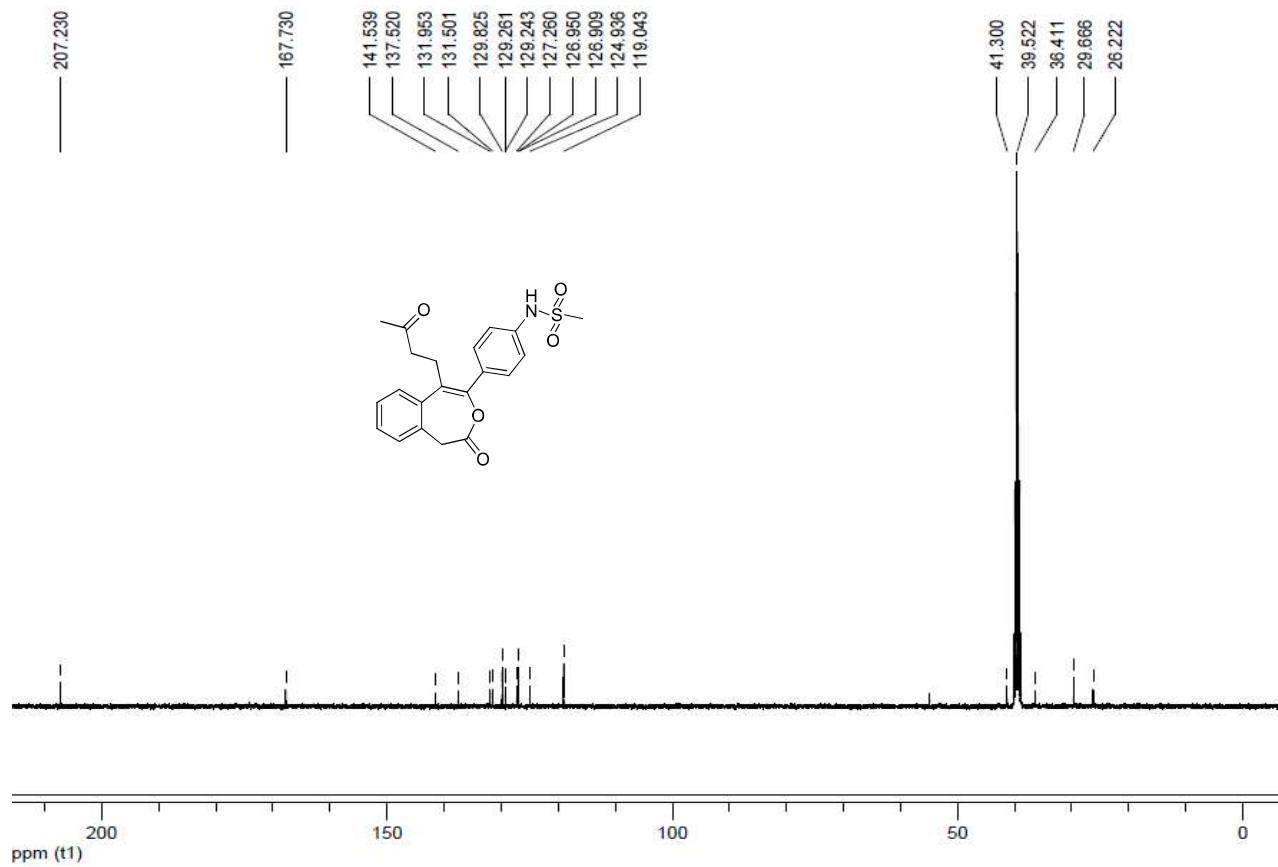

$^1\text{H}$  NMR (Varian, 400 MHz) spectrum of compound **3h** in  $\text{DMSO-}d_6$

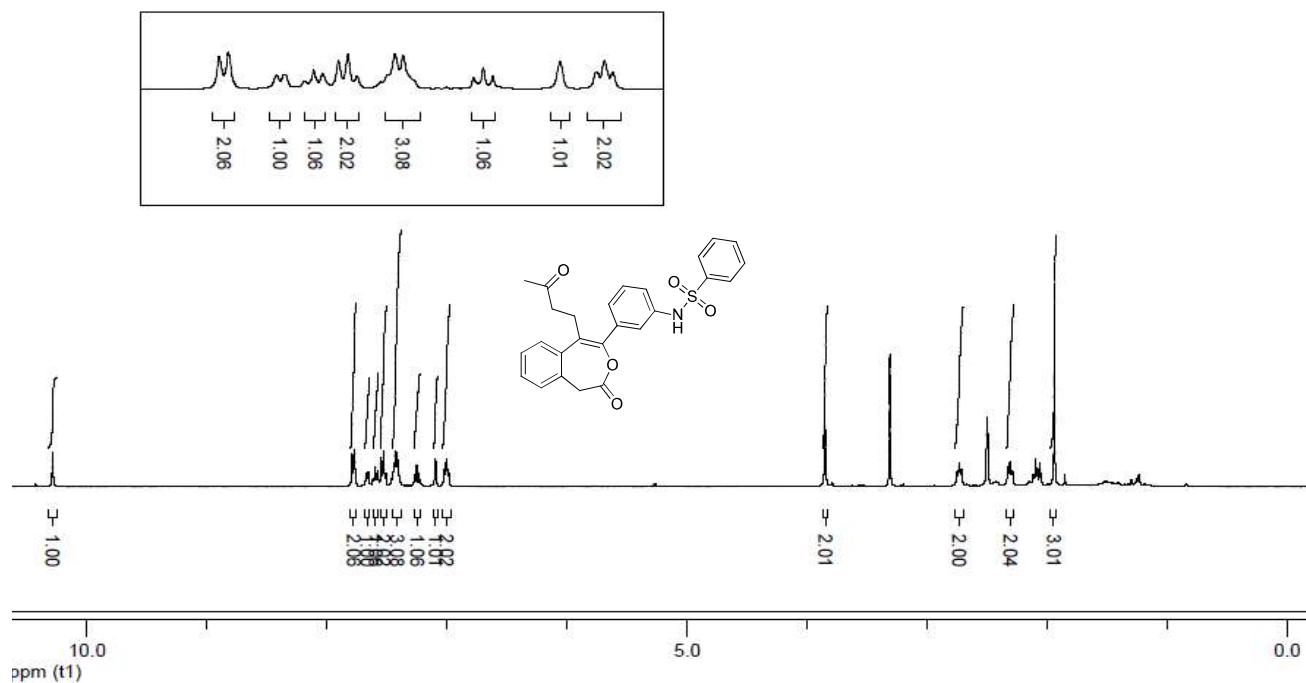

$^{13}\text{C}$  NMR spectrum (Varian, 100 MHz) of compound **3h** in  $\text{DMSO-}d_6$

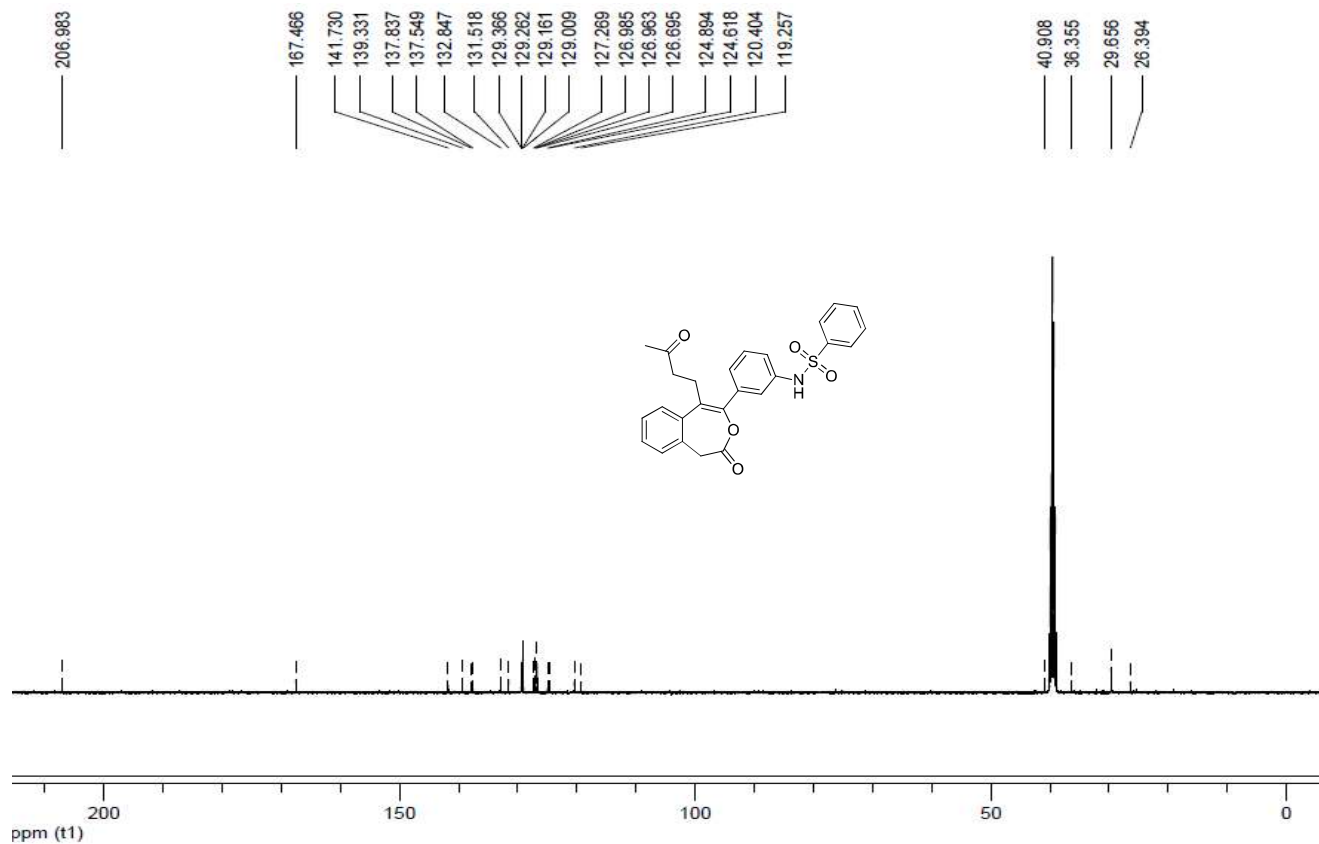

$^1\text{H}$  NMR (Varian, 400 MHz) spectrum of compound **3i** in  $\text{DMSO-}d_6$

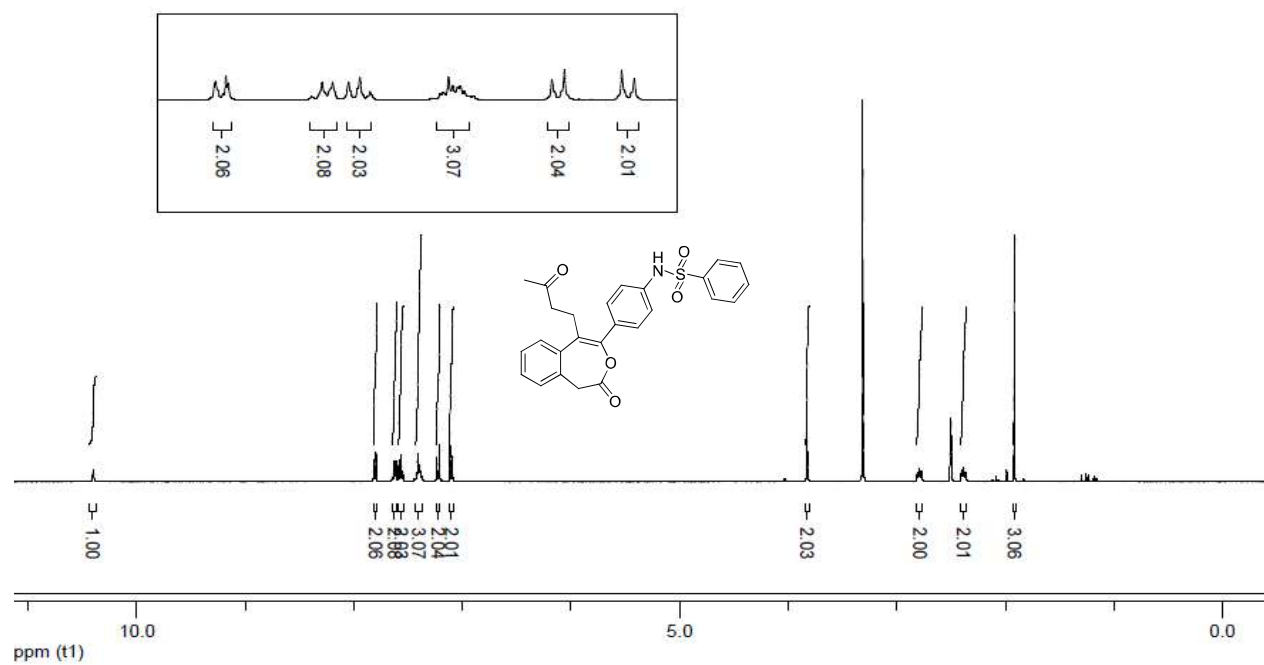

$^{13}\text{C}$  NMR spectrum (Varian, 100 MHz) of compound **3i** in  $\text{DMSO-}d_6$

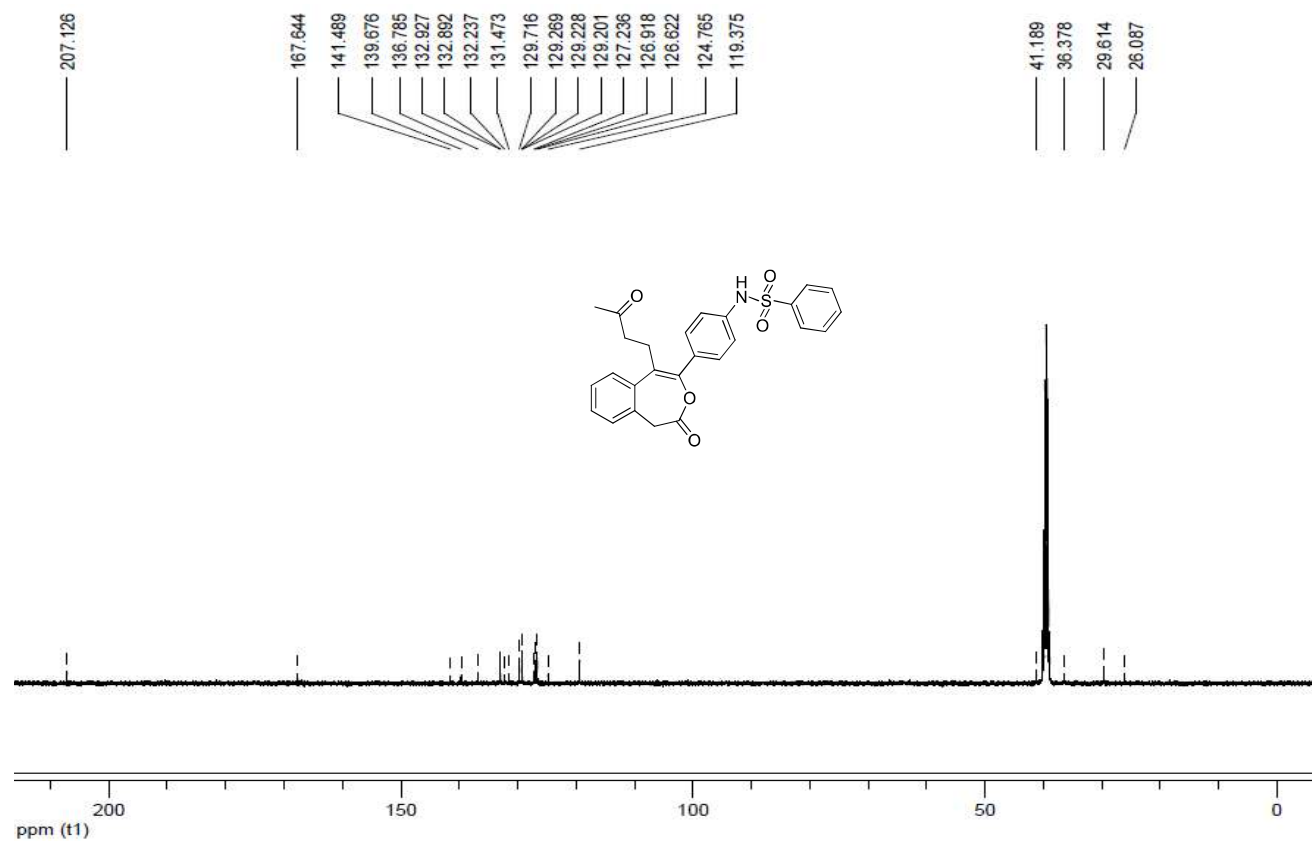

$^1\text{H}$  NMR (Varian, 400 MHz) spectrum of compound **3j** in  $\text{DMSO-}d_6$

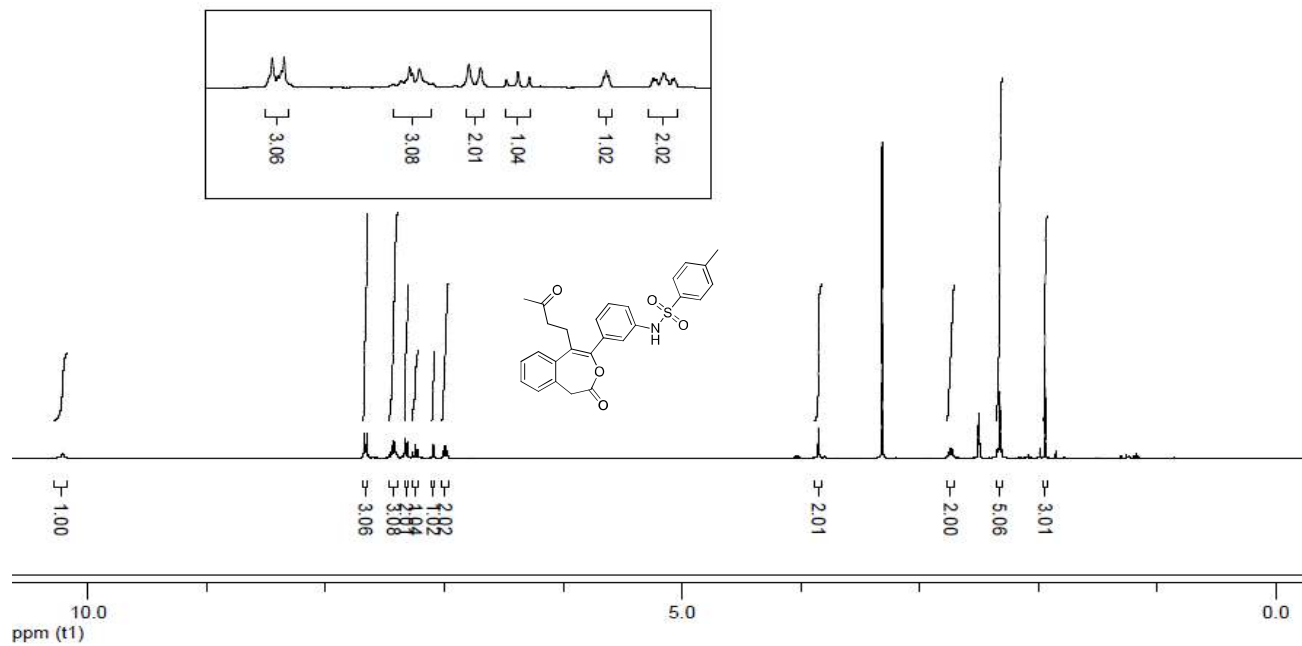

$^{13}\text{C}$  NMR spectrum (Varian, 100 MHz) of compound **3j** in  $\text{DMSO-}d_6$

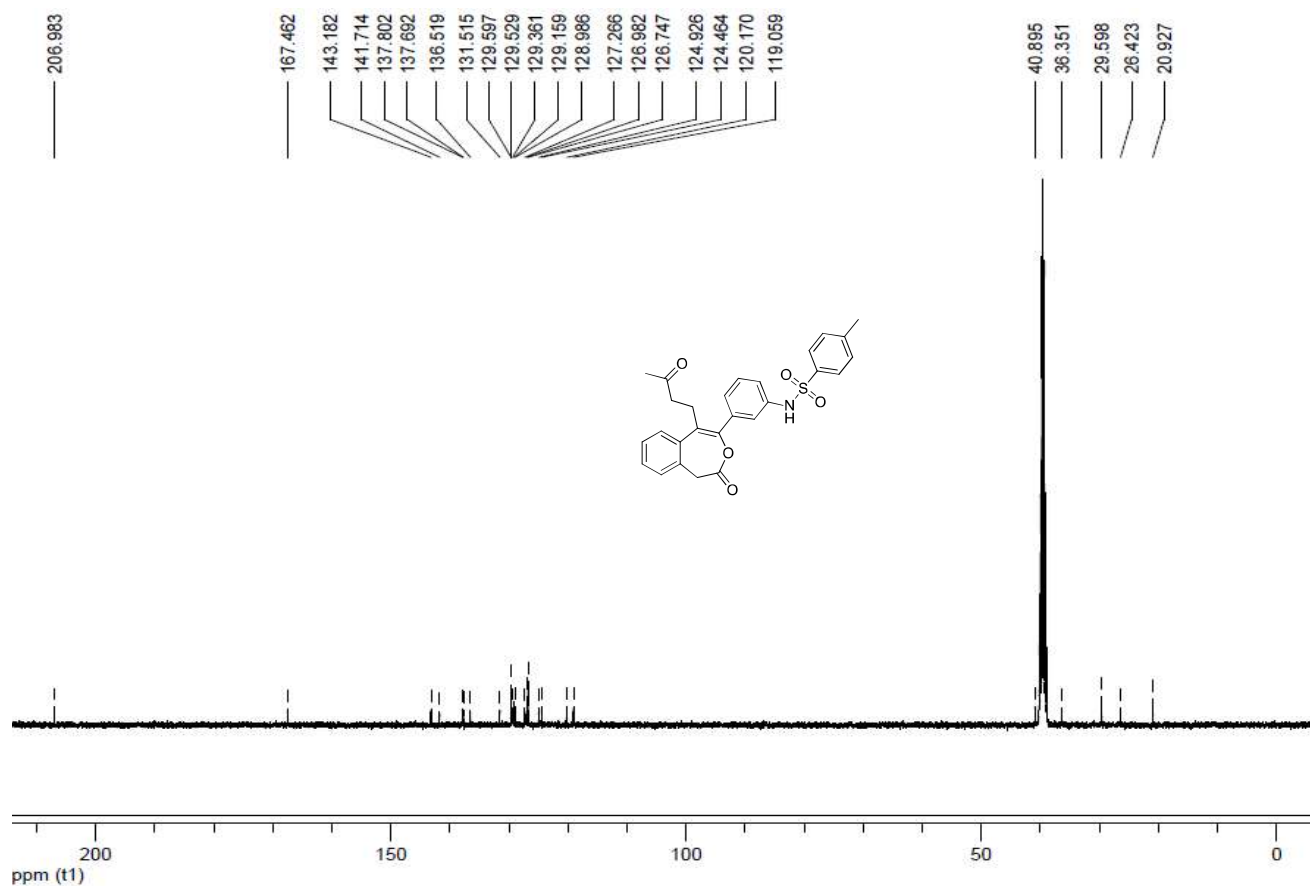

$^1\text{H}$  NMR (Varian, 400 MHz) spectrum of compound **3k** in  $\text{DMSO-}d_6$

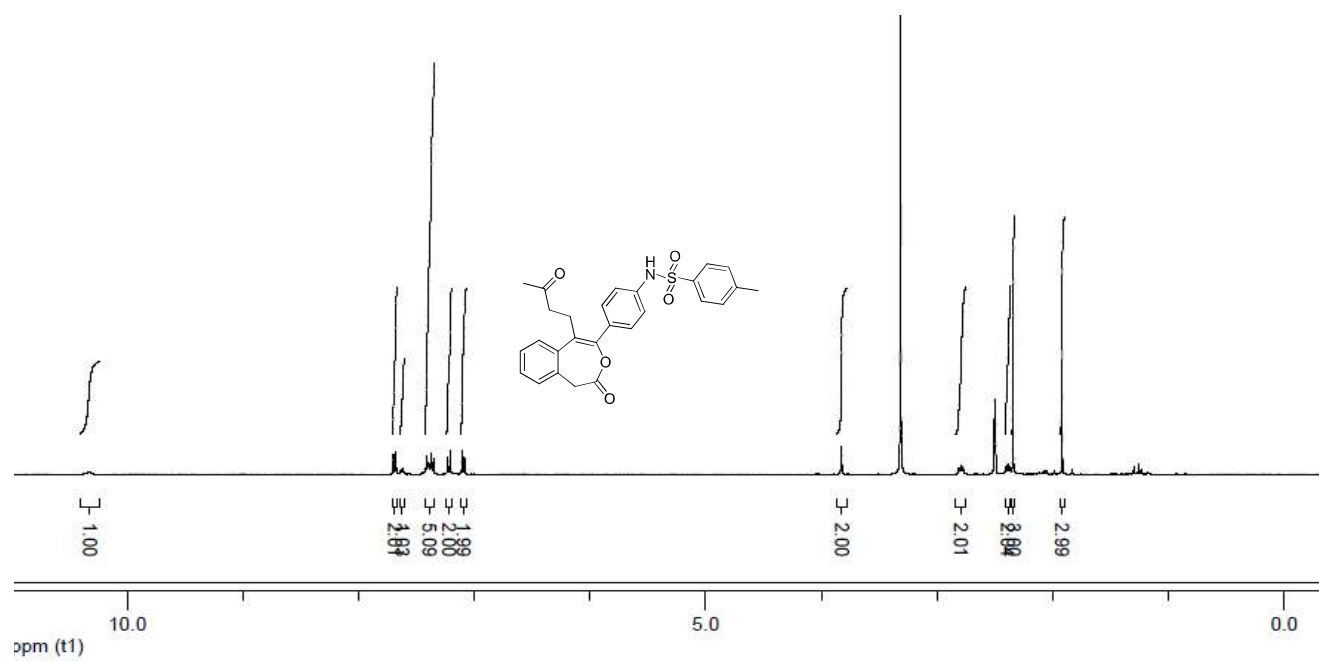

$^{13}\text{C}$  NMR spectrum (Varian, 100 MHz) of compound **3k** in  $\text{DMSO-}d_6$

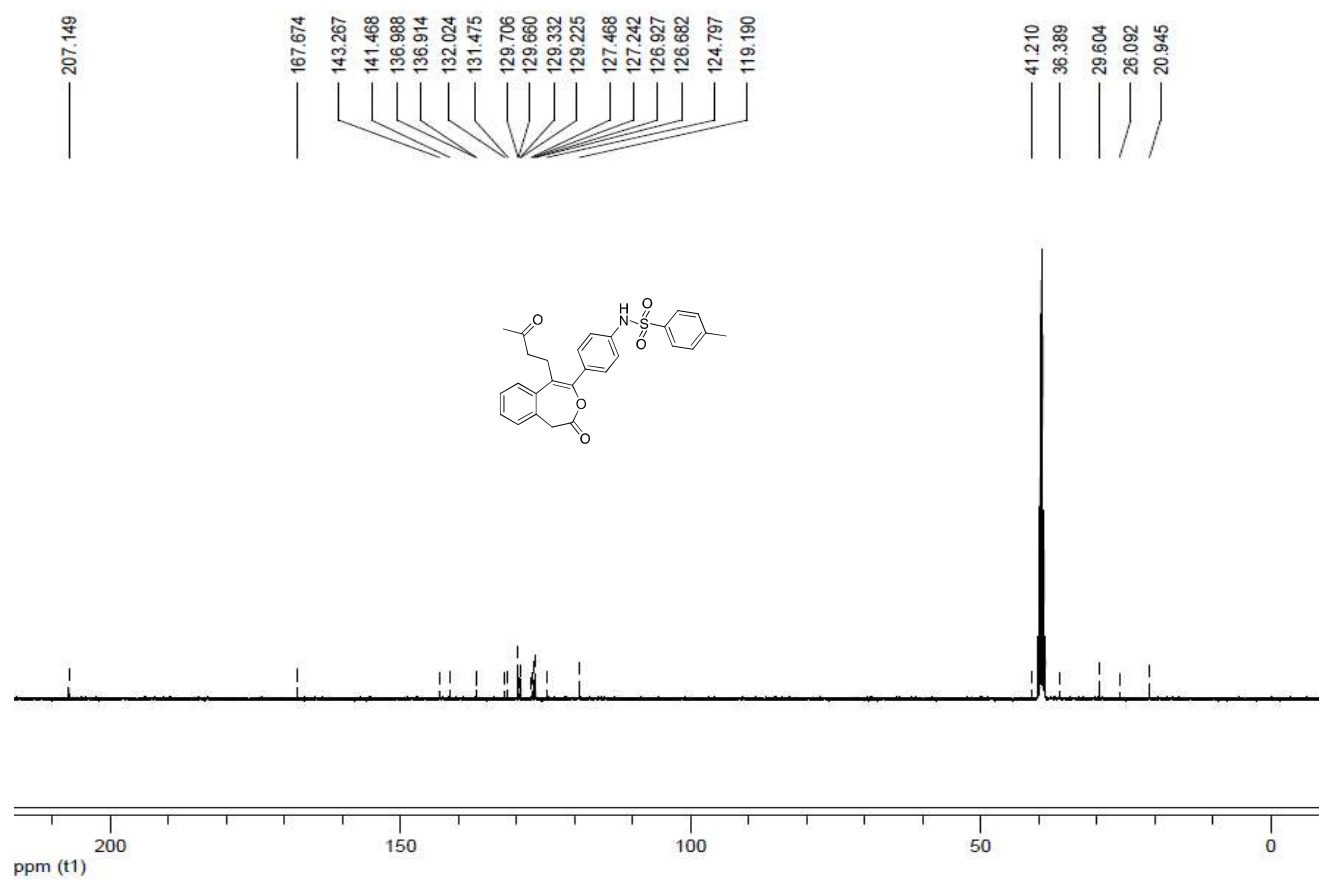



$^1\text{H}$  NMR (Varian, 400 MHz) spectrum of compound **31** in  $\text{DMSO-}d_6$

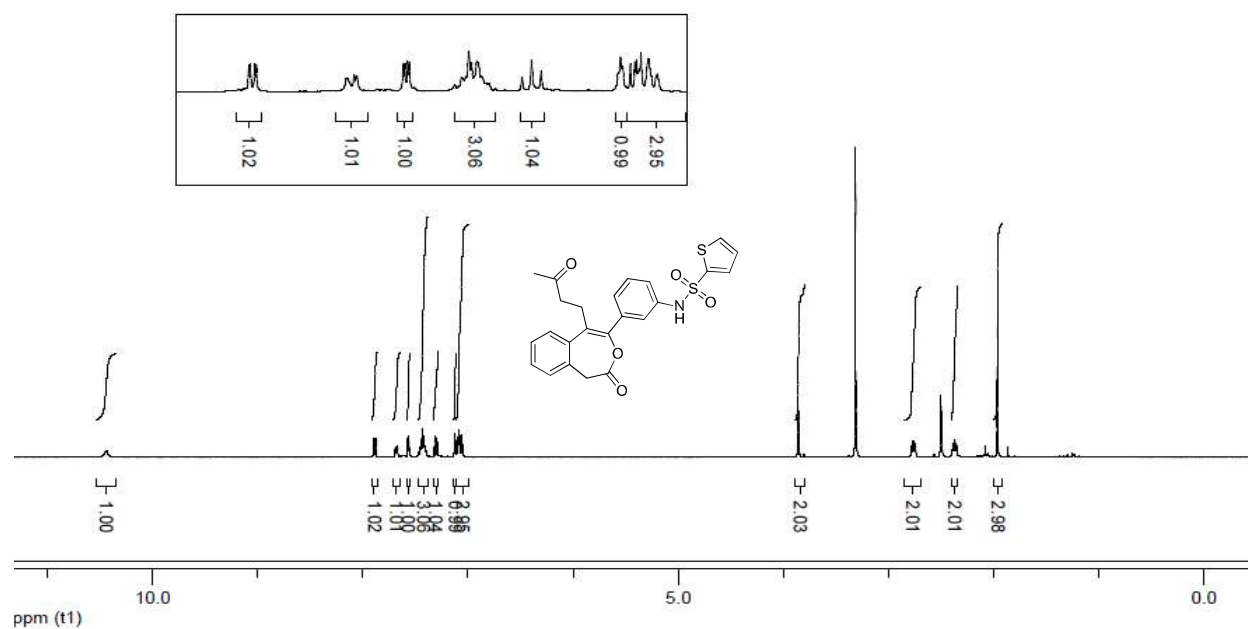

$^{13}\text{C}$  NMR spectrum (Varian, 100 MHz) of compound **31** in  $\text{DMSO-}d_6$

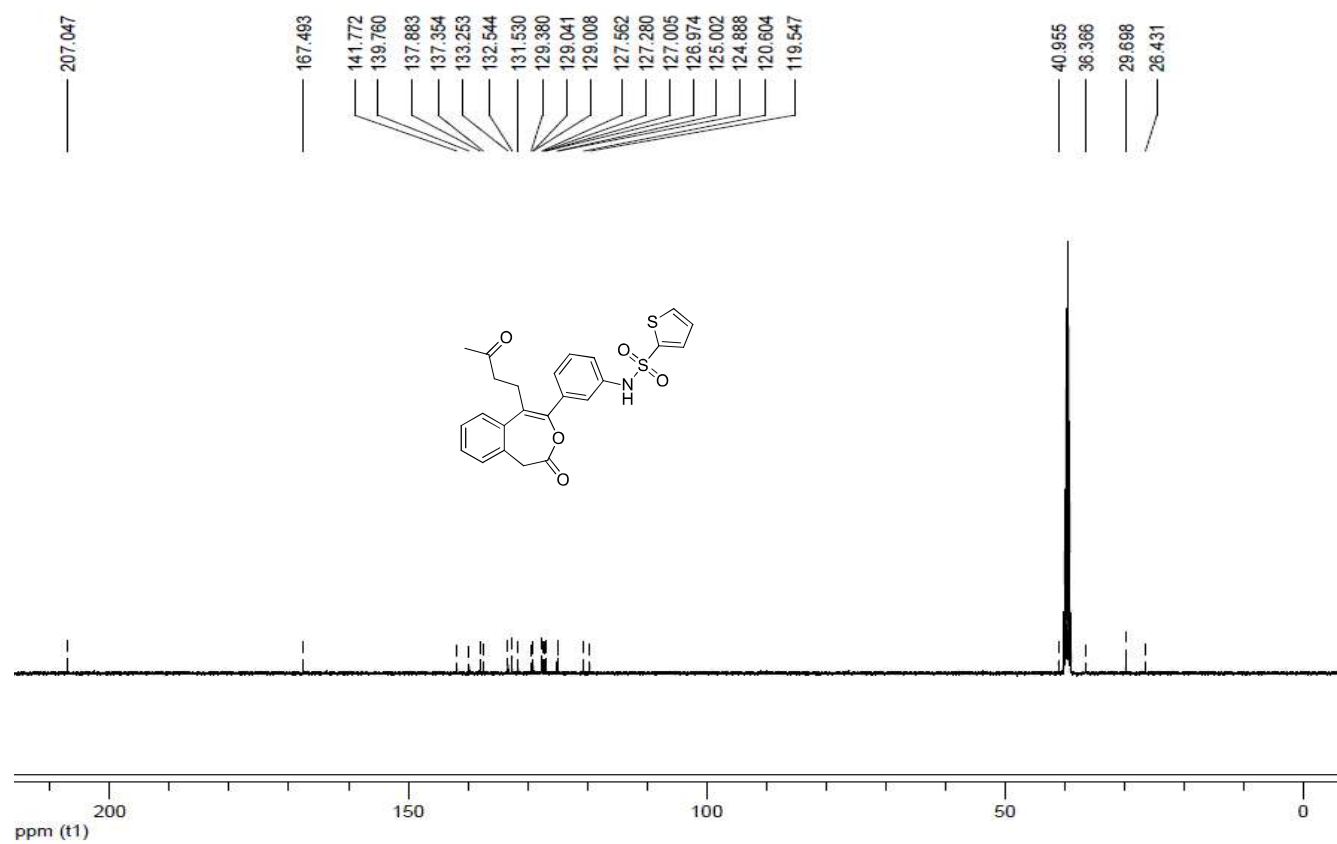

$^1\text{H}$  NMR (Varian, 400 MHz) spectrum of compound **3m** in  $\text{DMSO-}d_6$

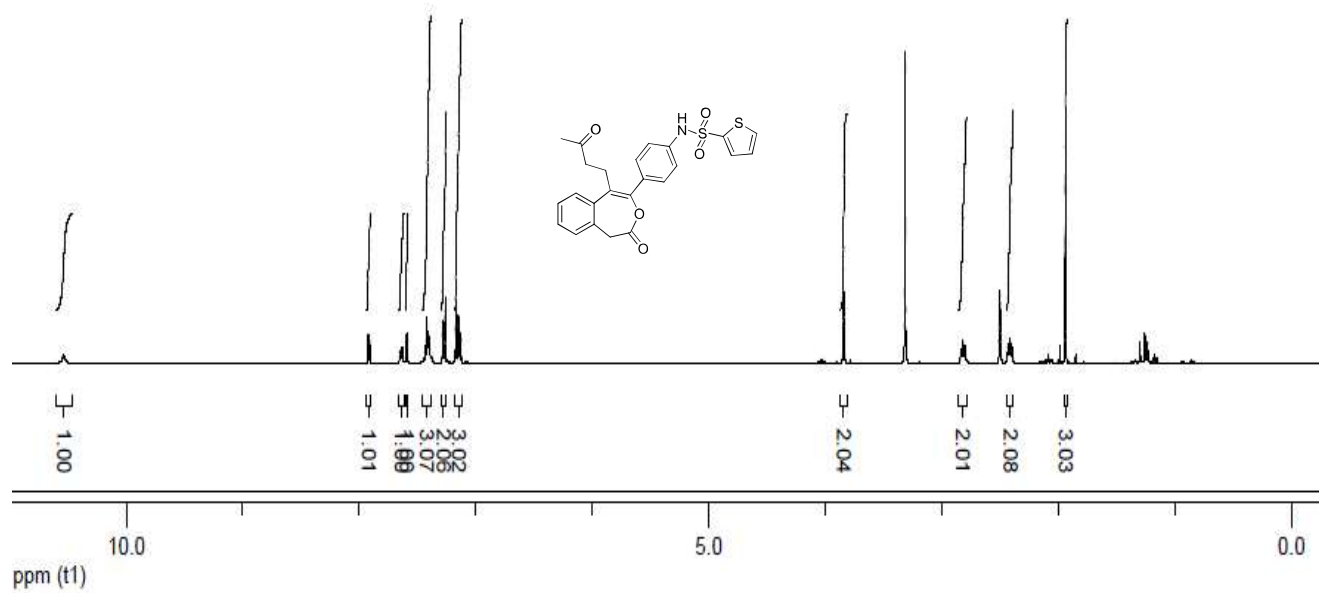

$^{13}\text{C}$  NMR spectrum (Varian, 100 MHz) of compound **3m** in  $\text{DMSO-}d_6$

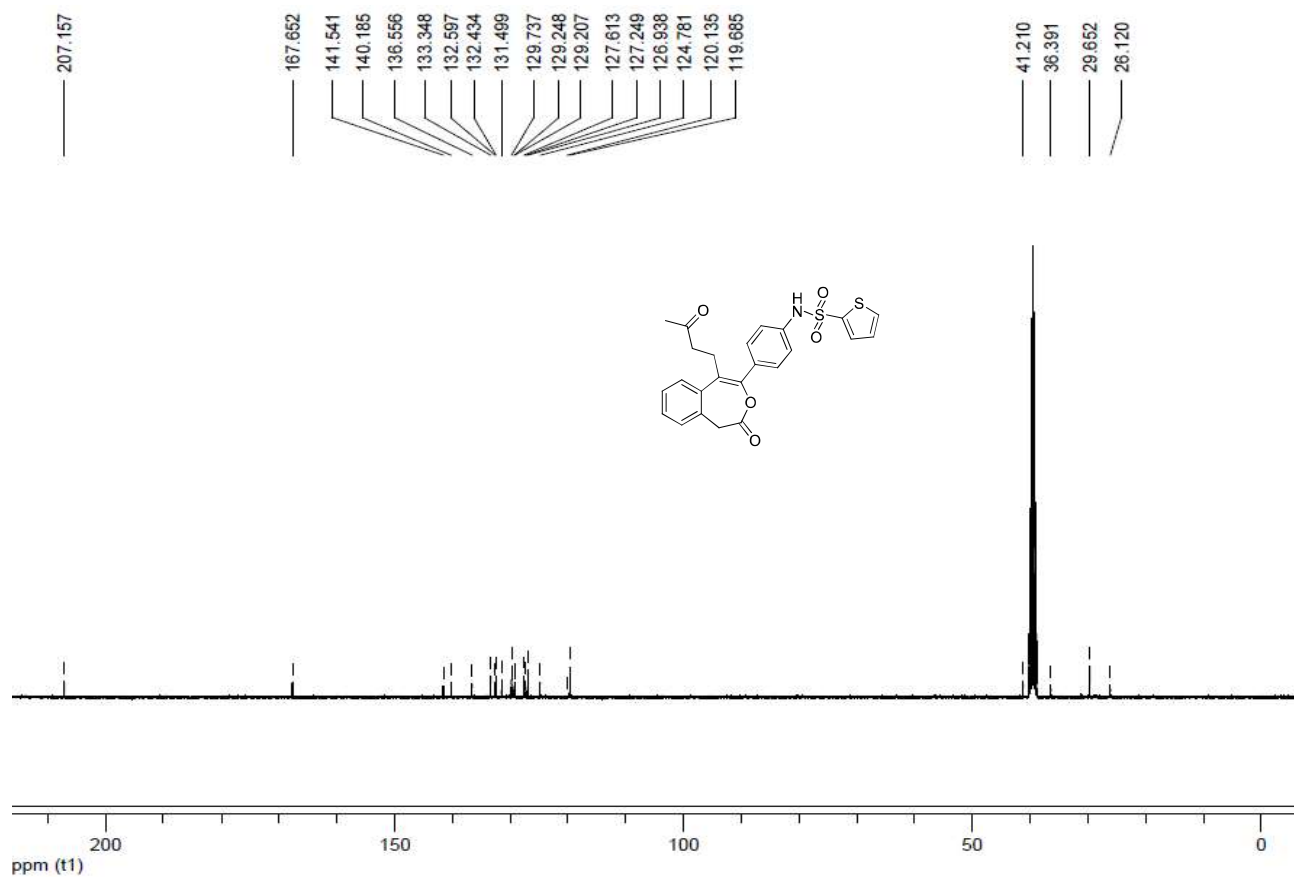

$^1\text{H}$  NMR (Varian, 400 MHz) spectrum of compound **3n** in  $\text{DMSO-}d_6$

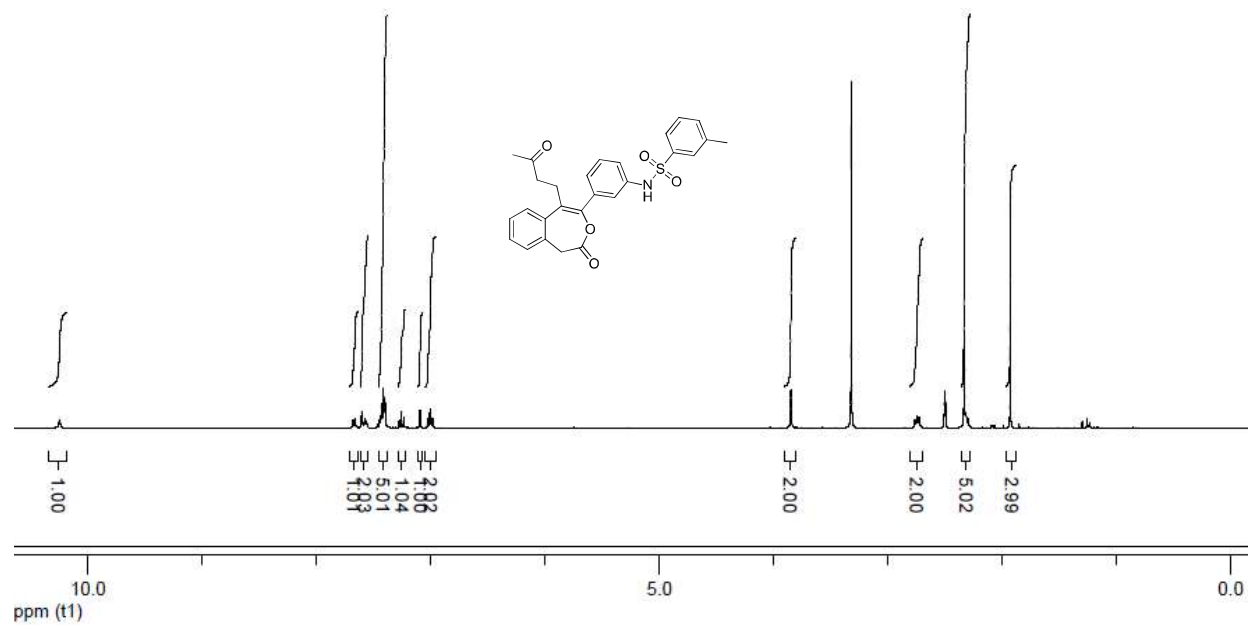

$^{13}\text{C}$  NMR spectrum (Varian, 100 MHz) of compound **3n** in  $\text{DMSO-}d_6$

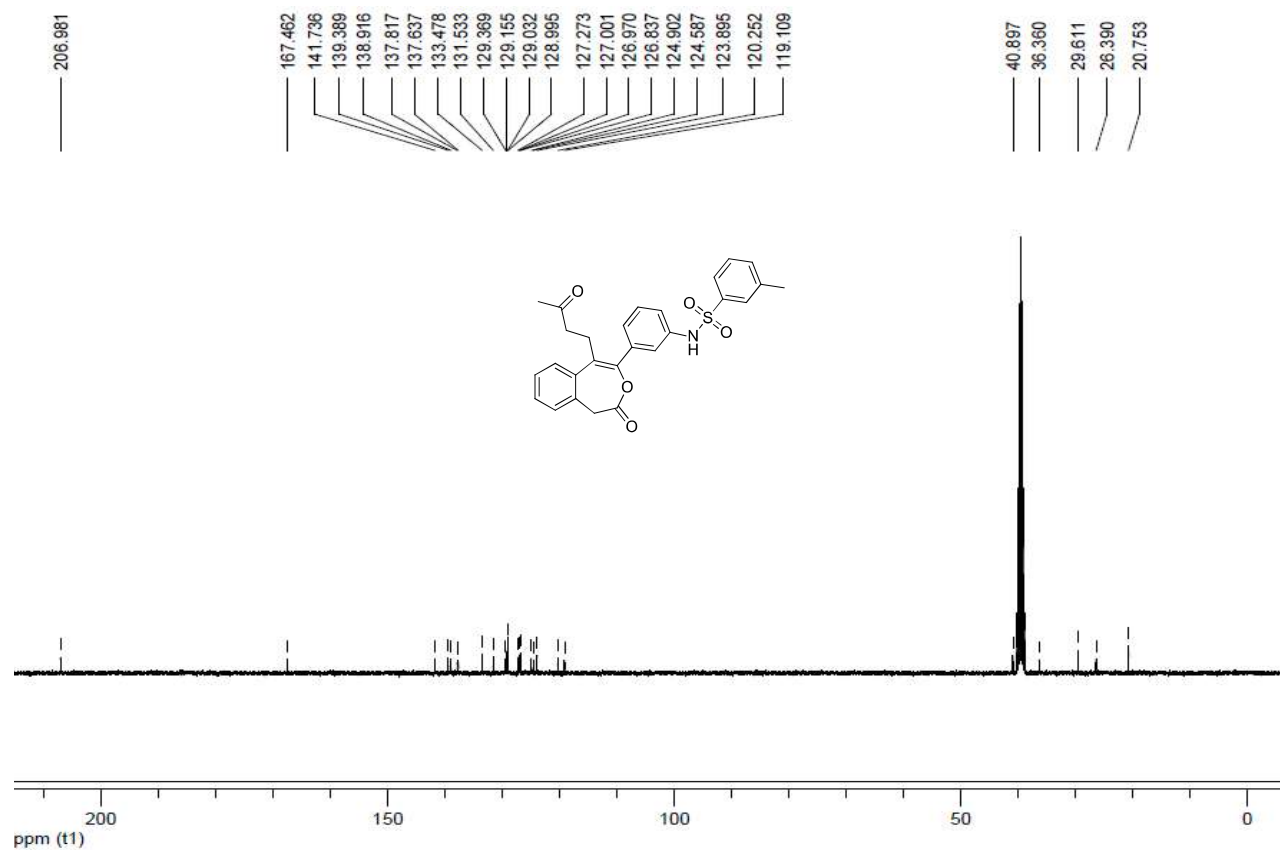

$^1\text{H}$  NMR (Varian, 400 MHz) spectrum of compound **4a** in  $\text{CDCl}_3$

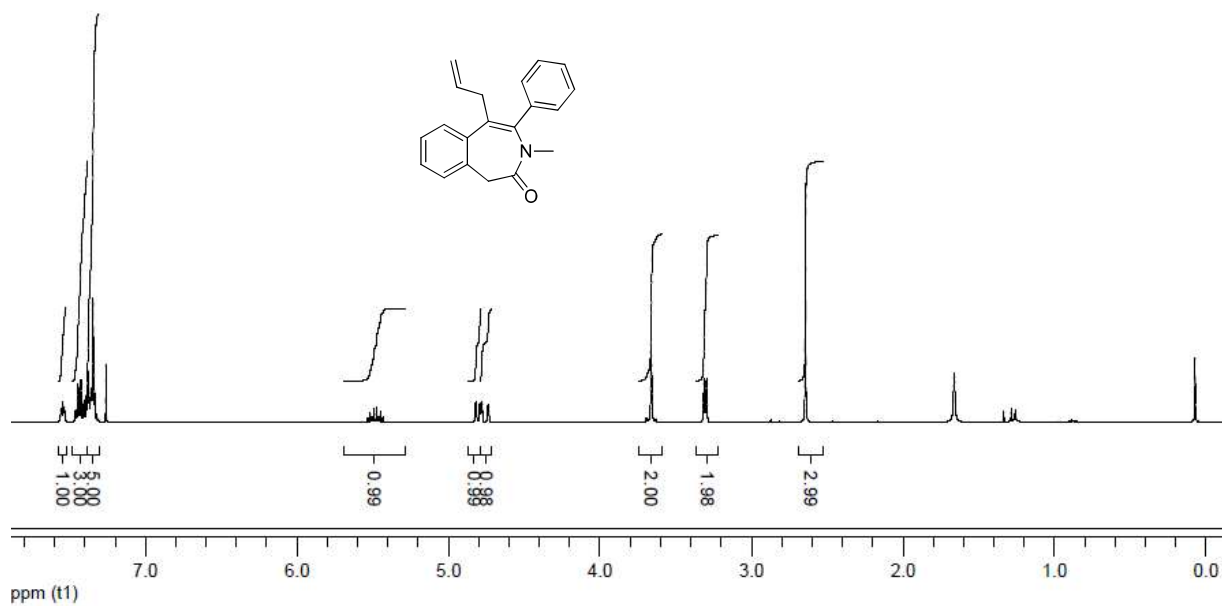

$^{13}\text{C}$  NMR spectrum (Varian, 100 MHz) of compound **4a** in  $\text{CDCl}_3$

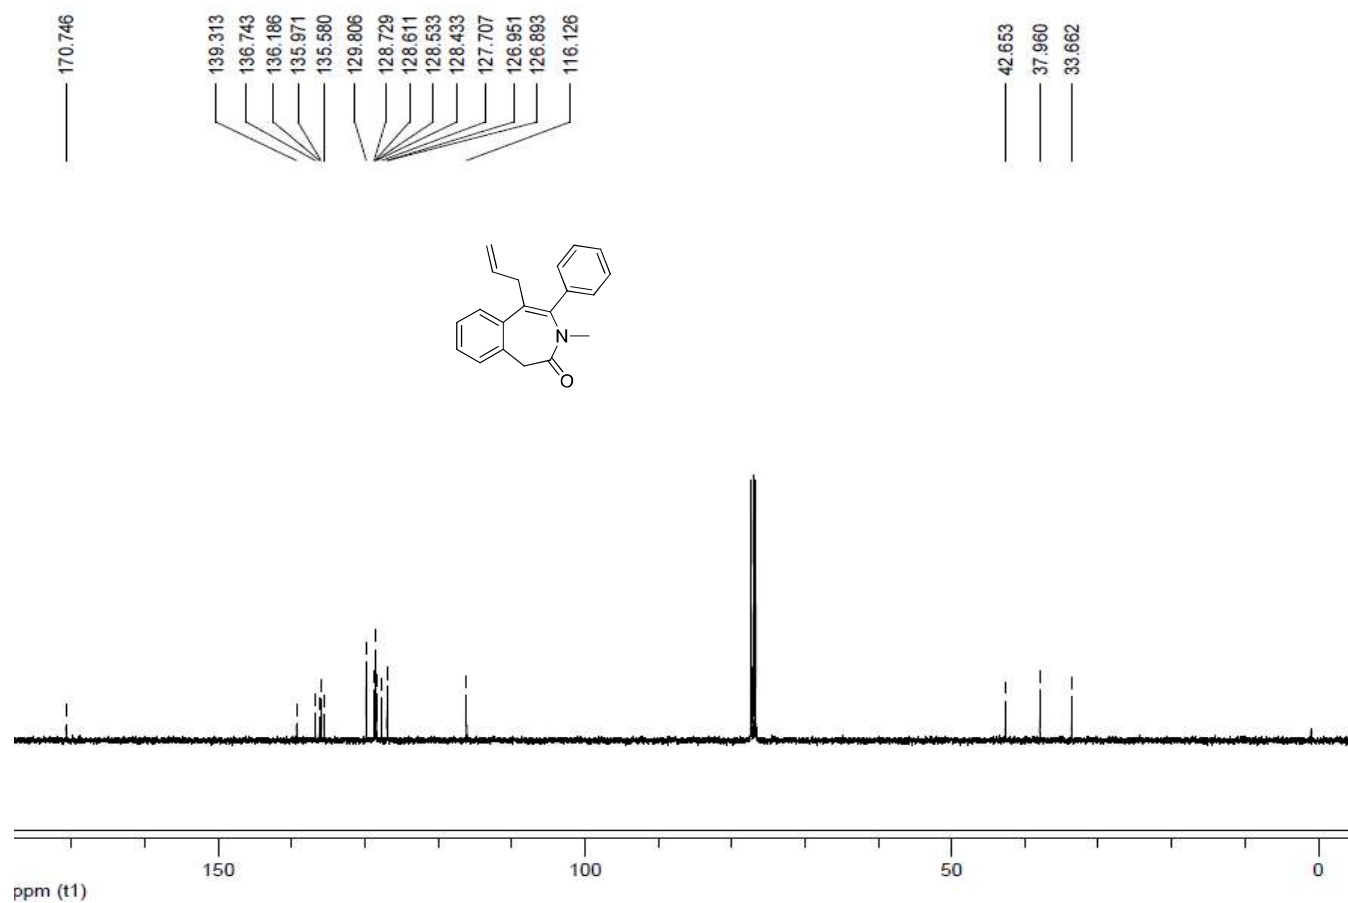

$^1\text{H}$  NMR (Varian, 400 MHz) spectrum of compound **4aa** in  $\text{DMSO-}d_6$

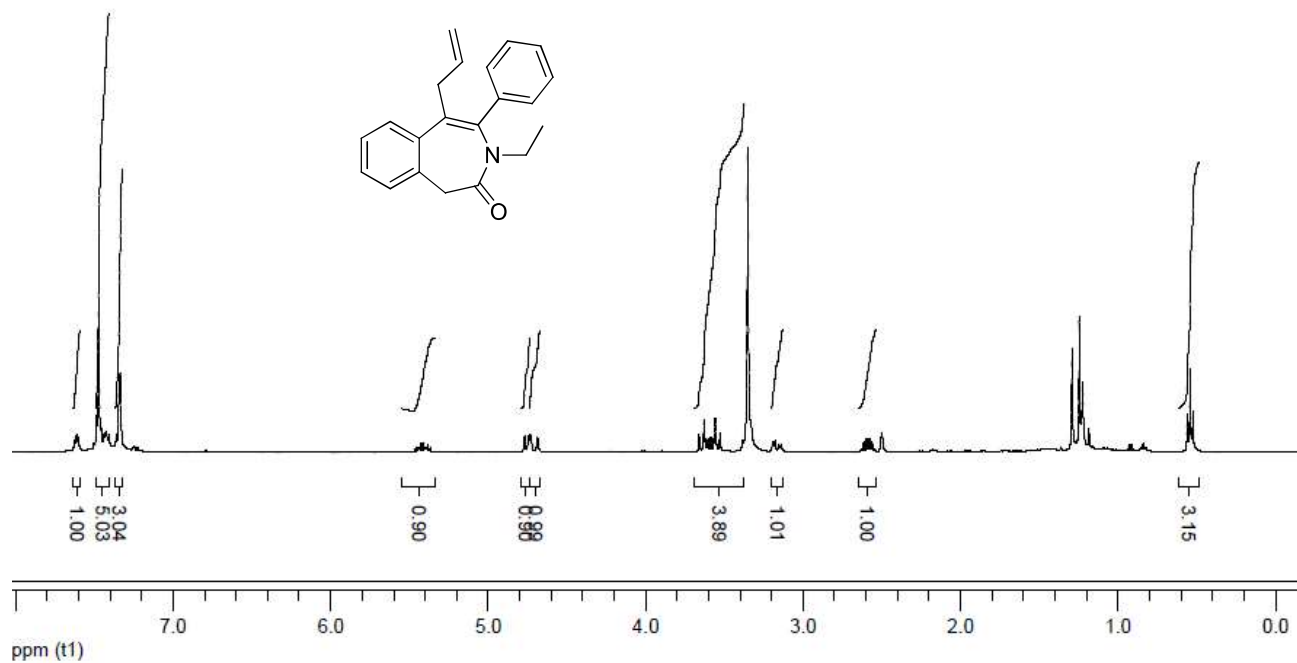

$^{13}\text{C}$  NMR spectrum (Varian, 100 MHz) of compound **4aa** in  $\text{DMSO-}d_6$

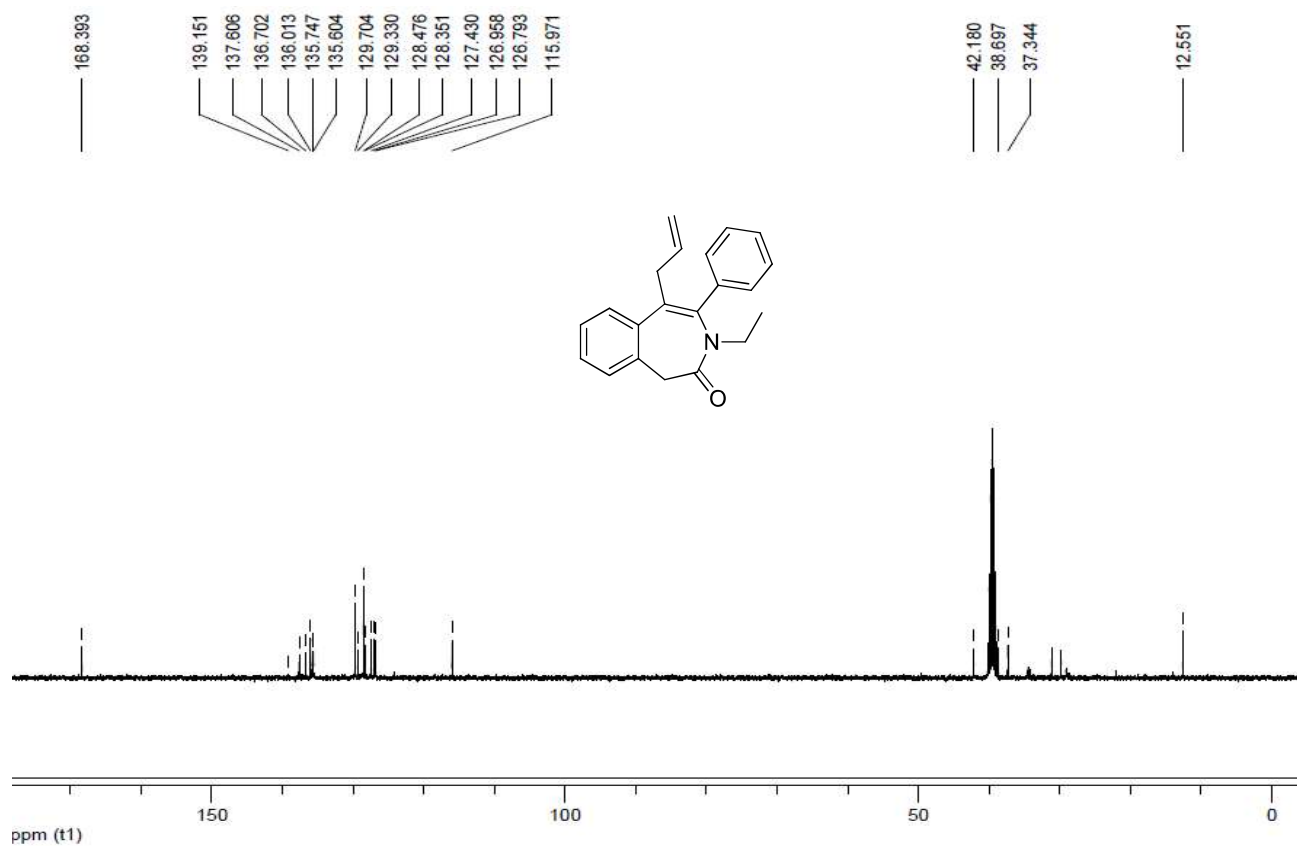

$^1\text{H}$  NMR (Varian, 400 MHz) spectrum of compound **4b** in  $\text{DMSO-}d_6$

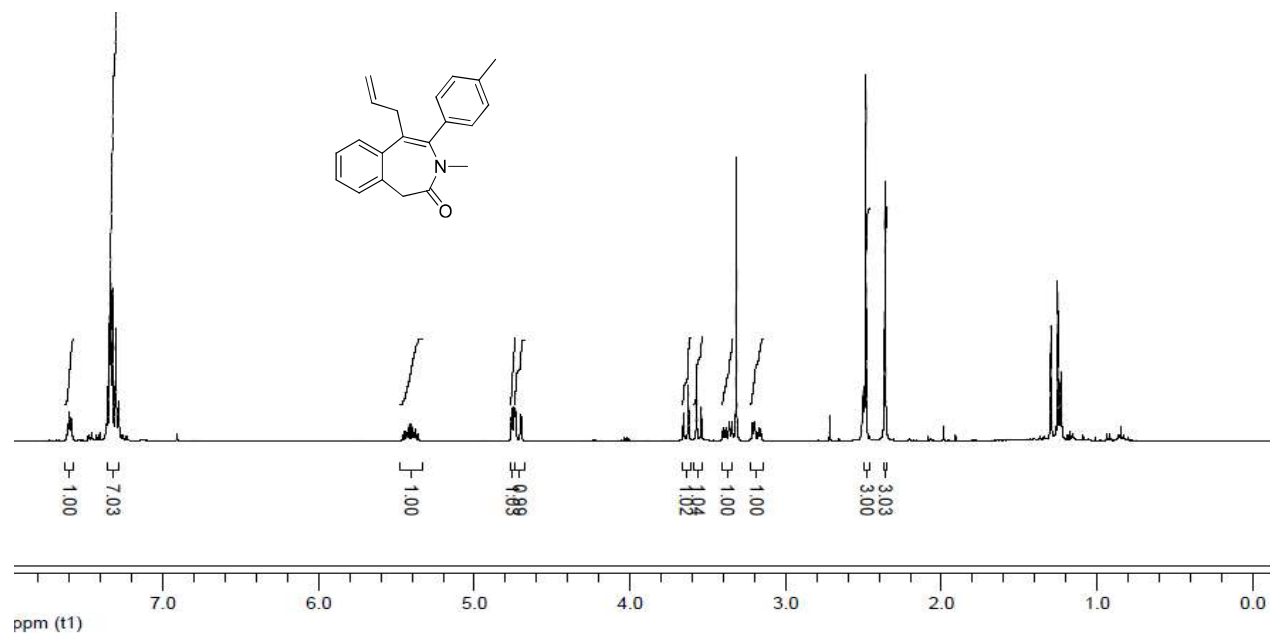

$^{13}\text{C}$  NMR spectrum (Varian, 100 MHz) of compound **4b** in  $\text{DMSO-}d_6$

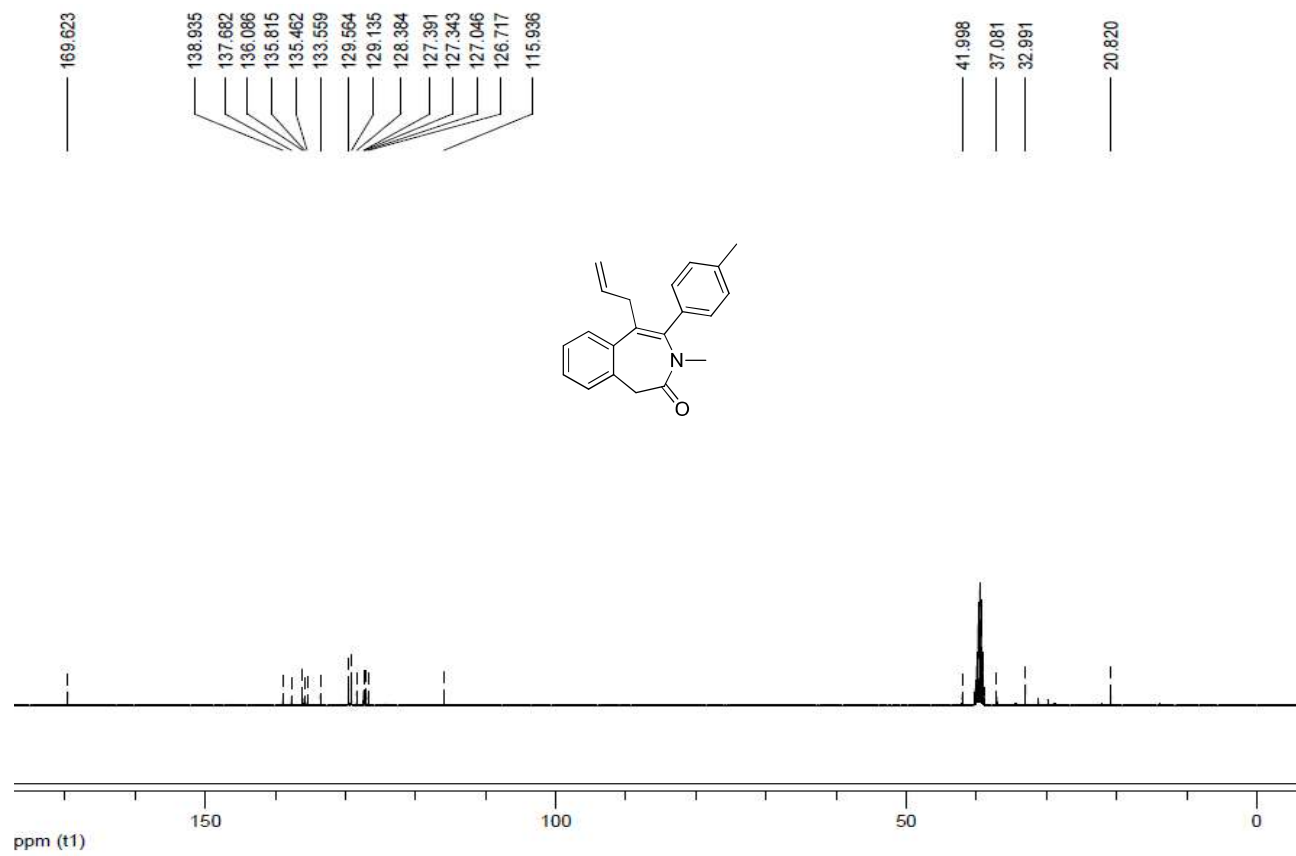

$^1\text{H}$  NMR (Varian, 400 MHz) spectrum of compound **4c** in  $\text{CDCl}_3$

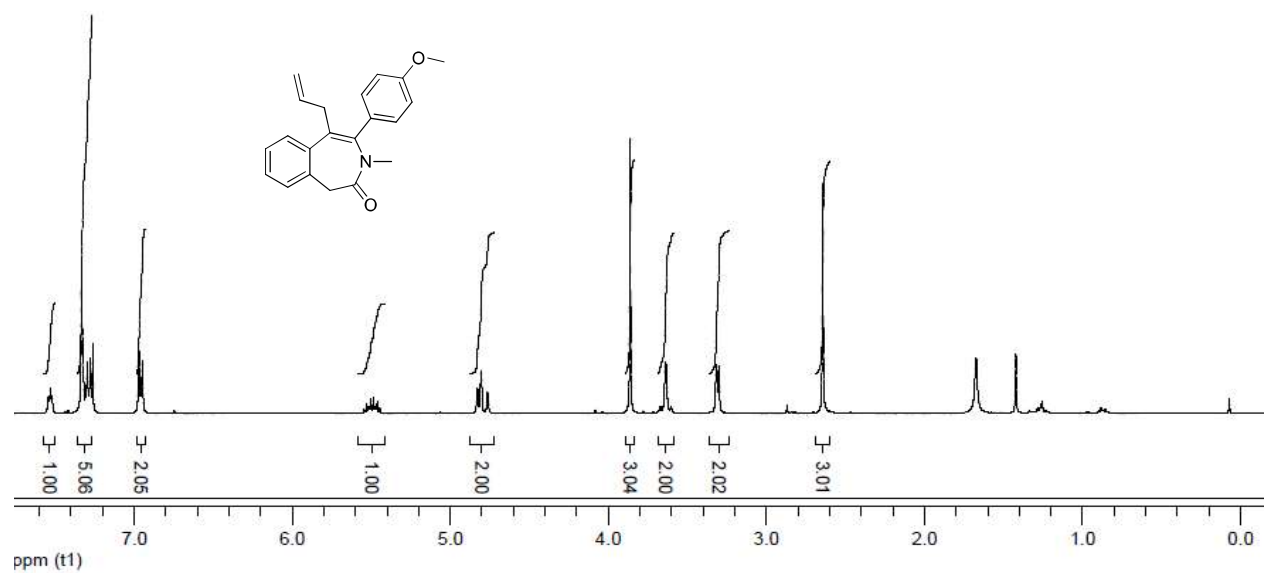

$^{13}\text{C}$  NMR spectrum (Varian, 100 MHz) of compound **4c** in  $\text{CDCl}_3$

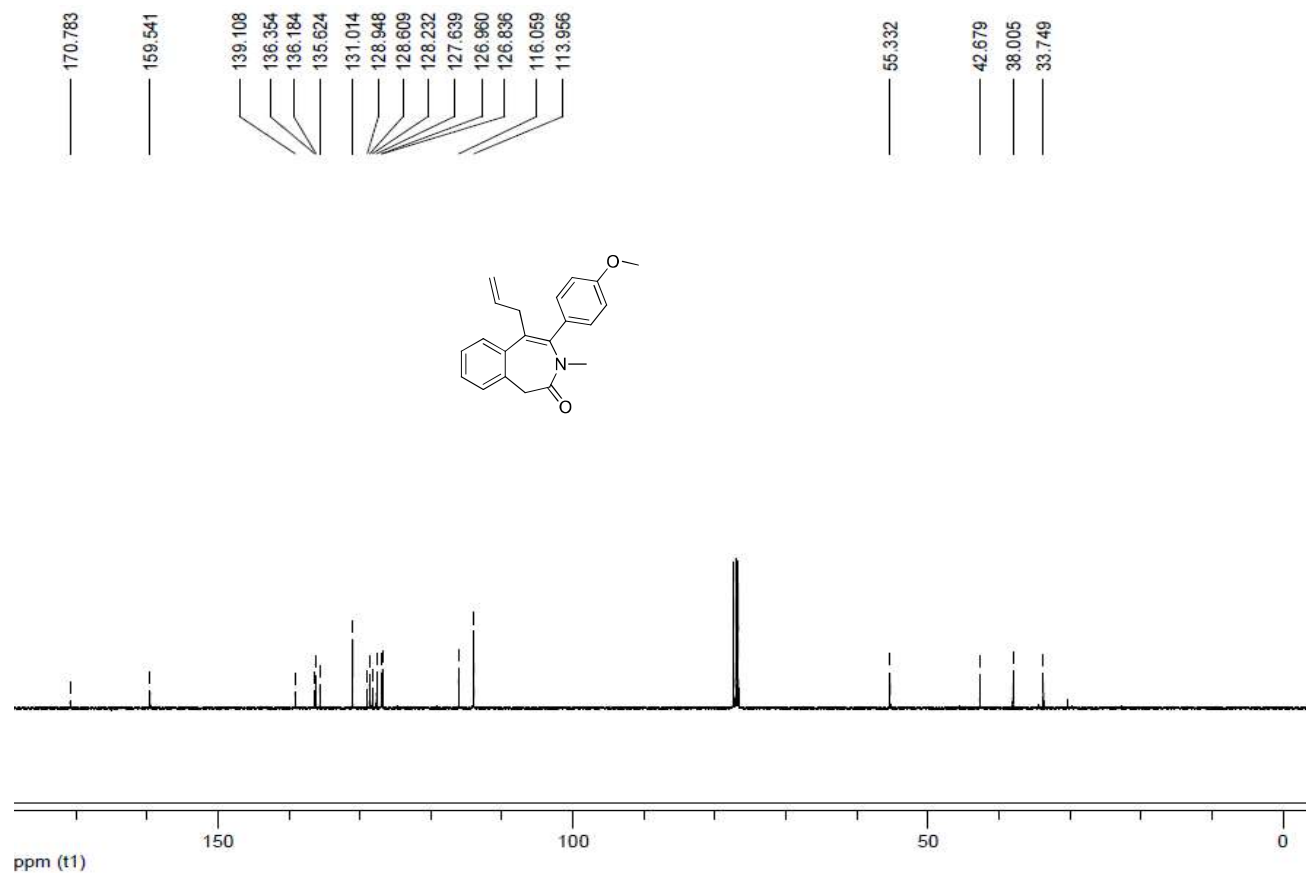

$^1\text{H}$  NMR (Varian, 400 MHz) spectrum of compound **4d** in  $\text{DMSO-}d_6$

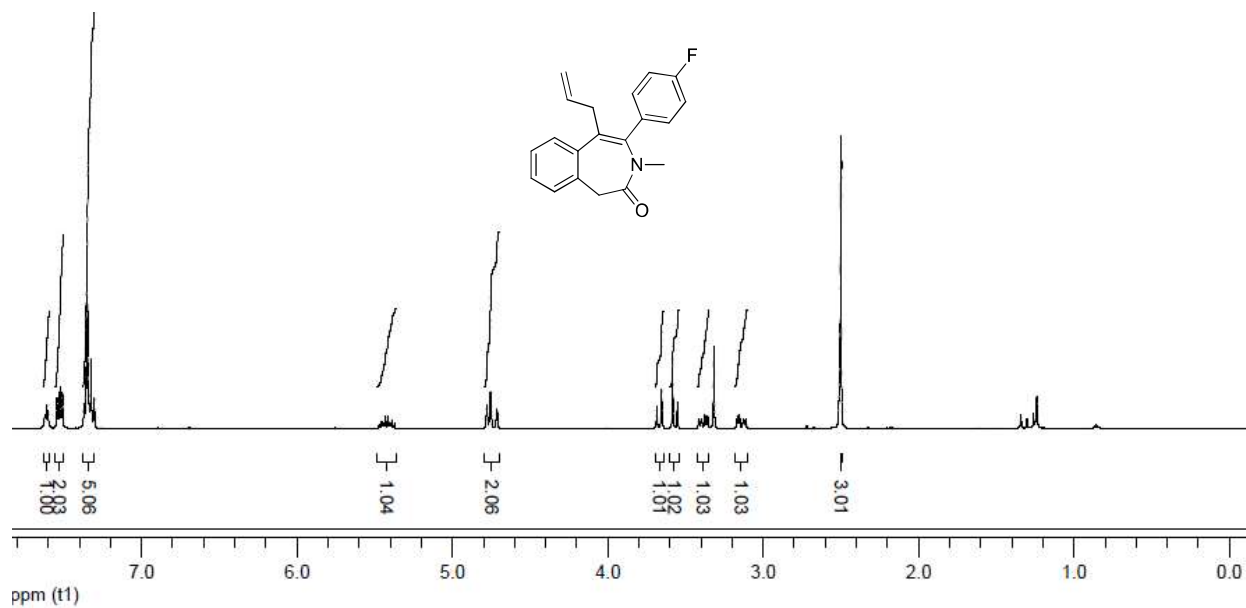

$^{13}\text{C}$  NMR spectrum (Varian, 100 MHz) of compound **4d** in  $\text{DMSO-}d_6$

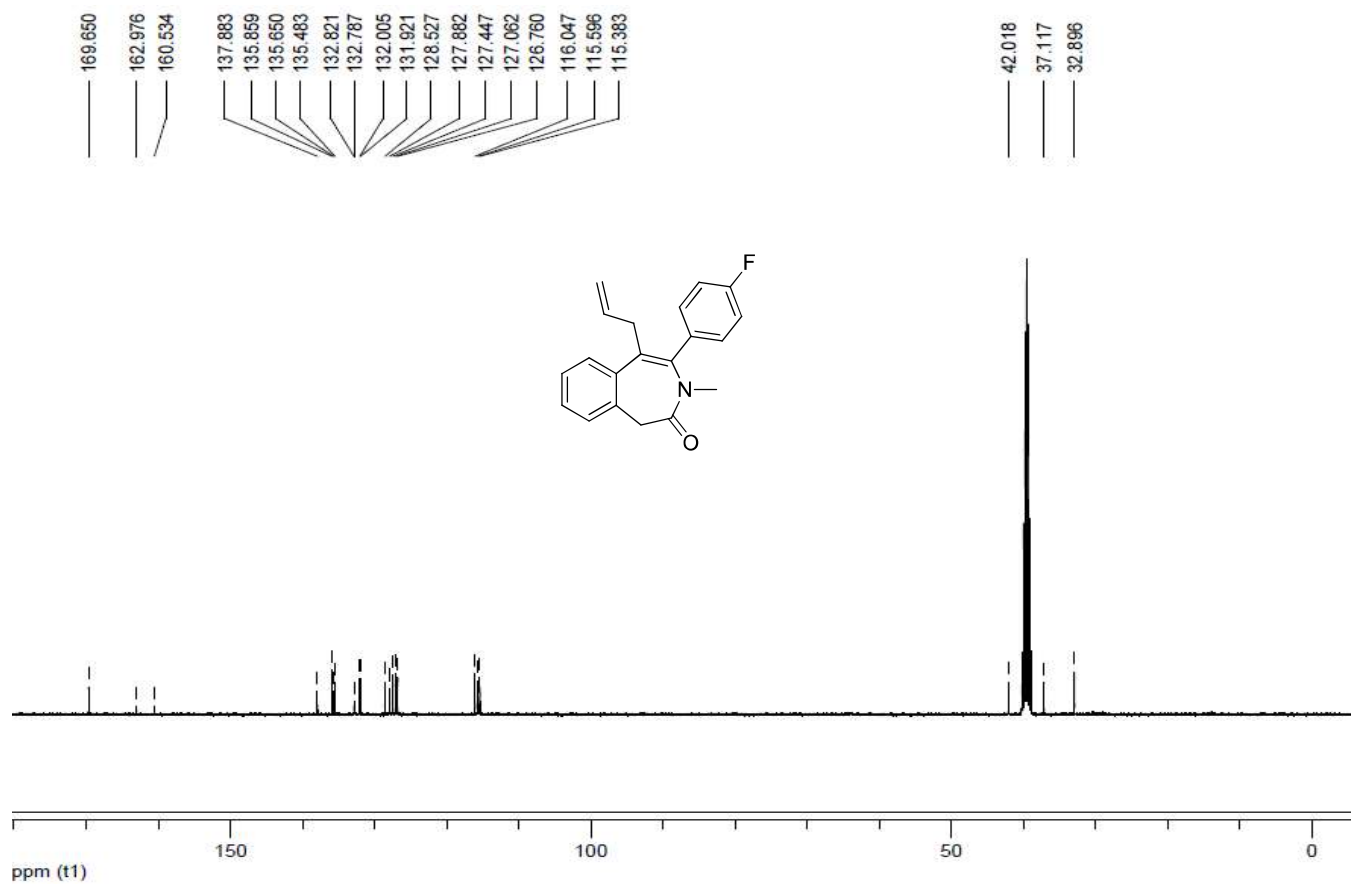



$^1\text{H}$  NMR (Varian, 400 MHz) spectrum of compound **4e** in  $\text{DMSO-}d_6$

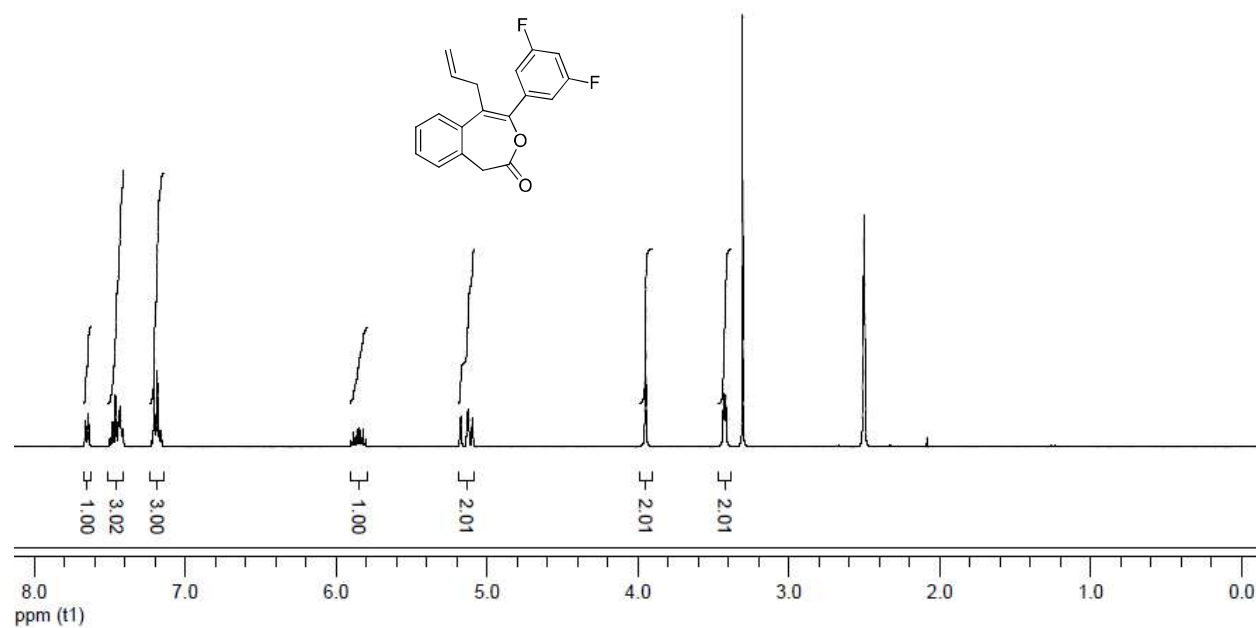

$^{13}\text{C}$  NMR spectrum (Varian, 100 MHz) of compound **4e** in  $\text{DMSO-}d_6$

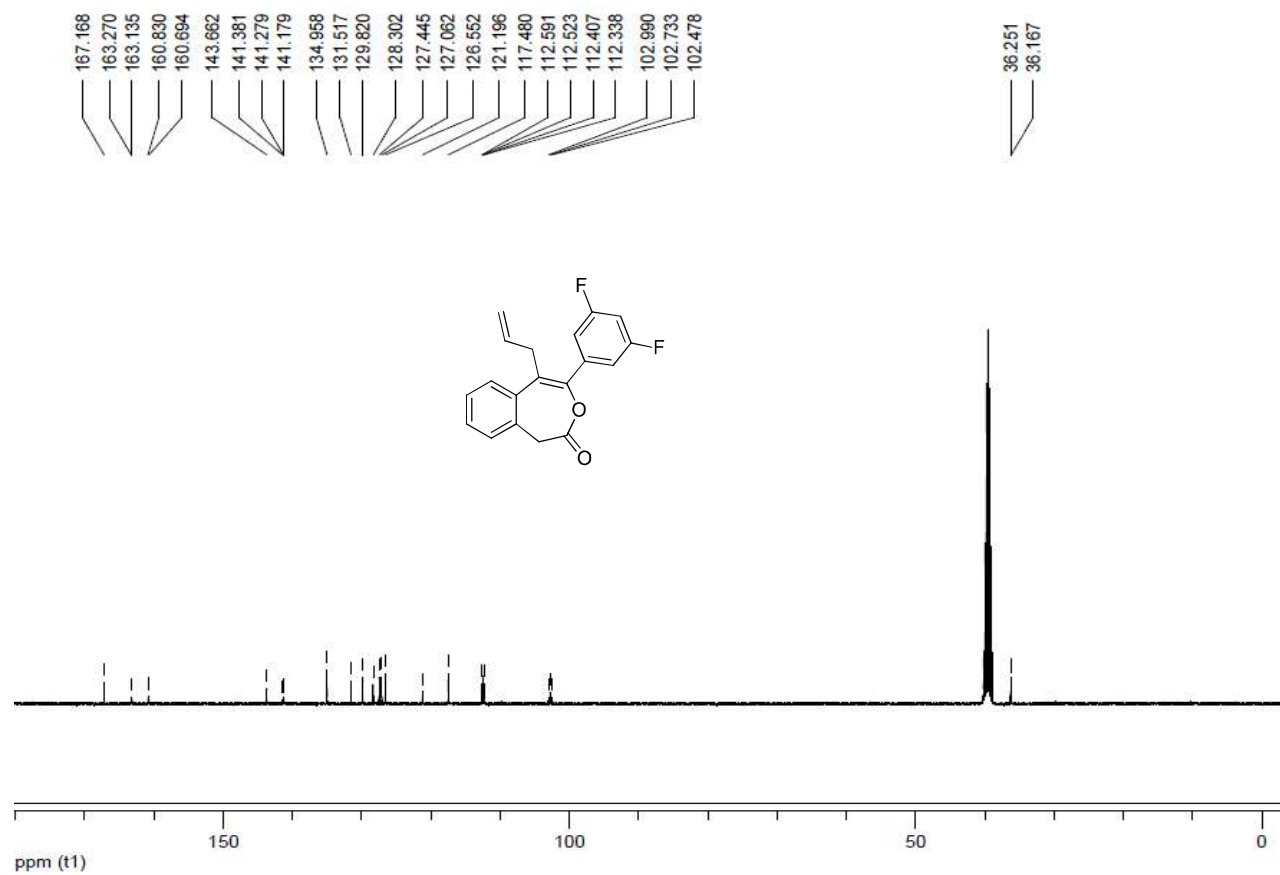

$^1\text{H}$  NMR (Varian, 400 MHz) spectrum of compound **4f** in  $\text{DMSO-}d_6$

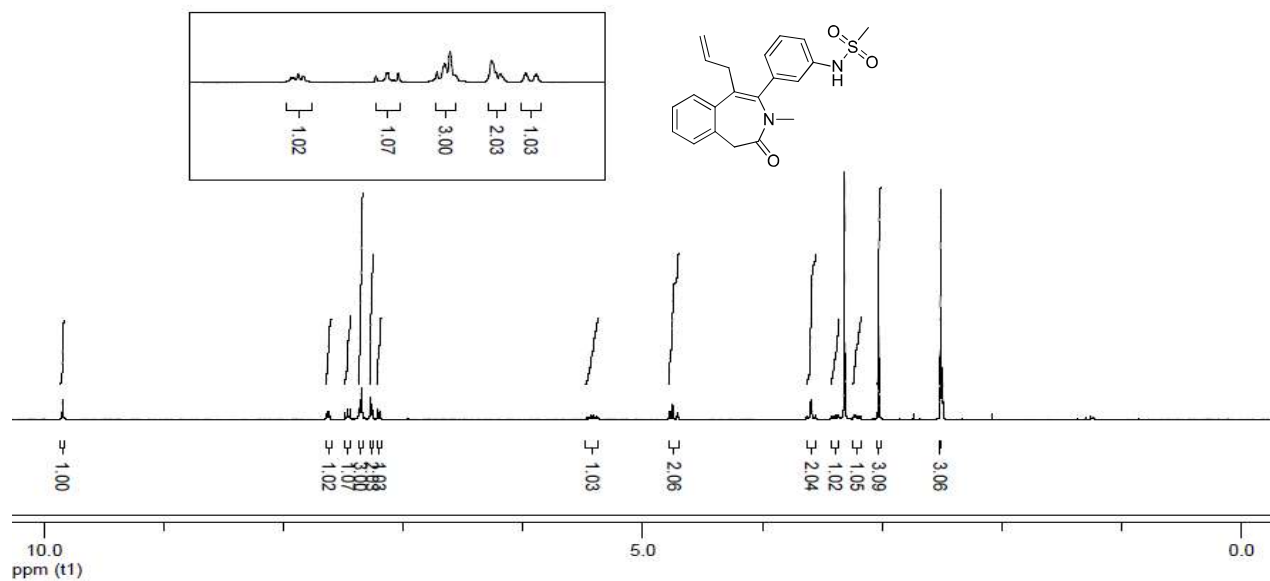

$^{13}\text{C}$  NMR spectrum (Varian, 100 MHz) of compound **4f** in  $\text{DMSO-}d_6$

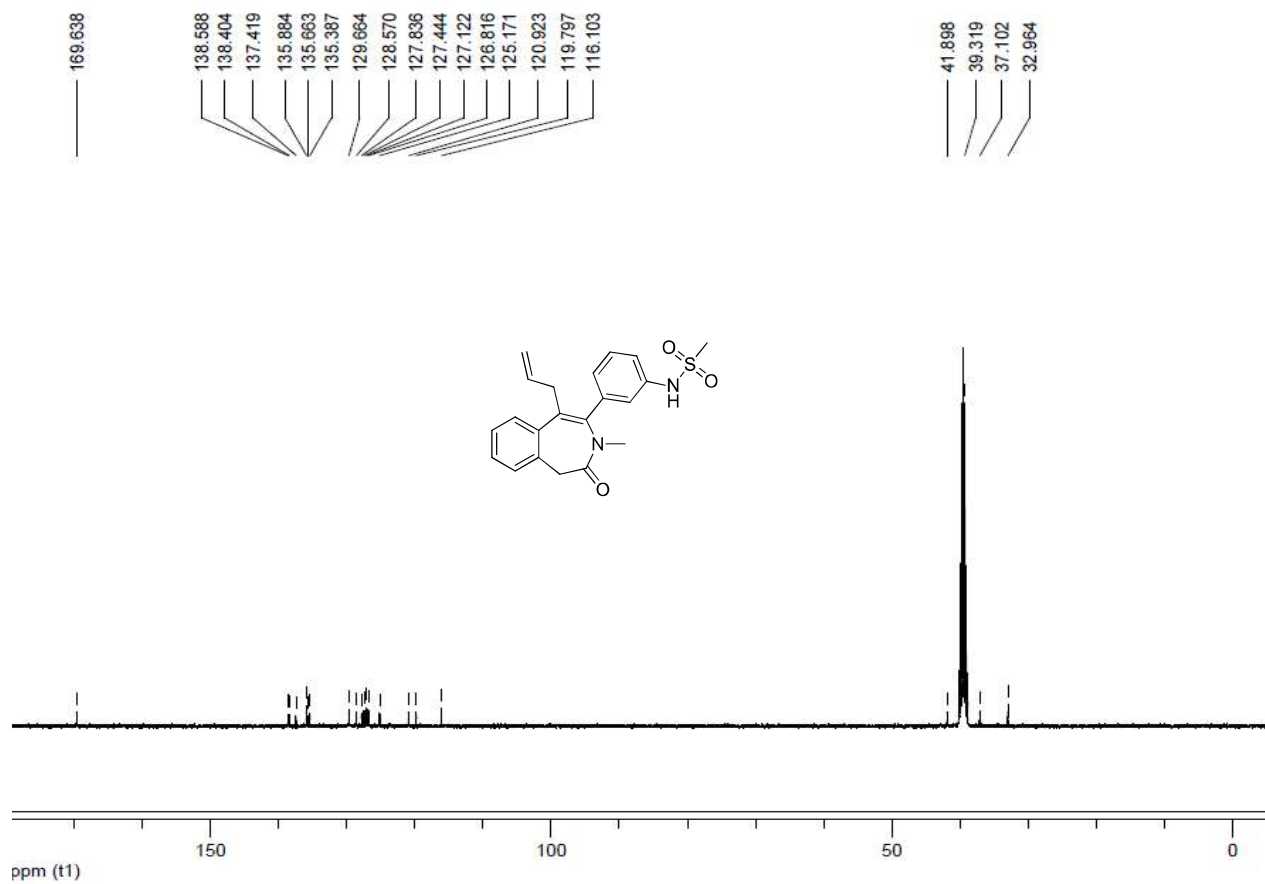

$^1\text{H}$  NMR (Varian, 400 MHz) spectrum of compound **4g** in  $\text{DMSO-}d_6$

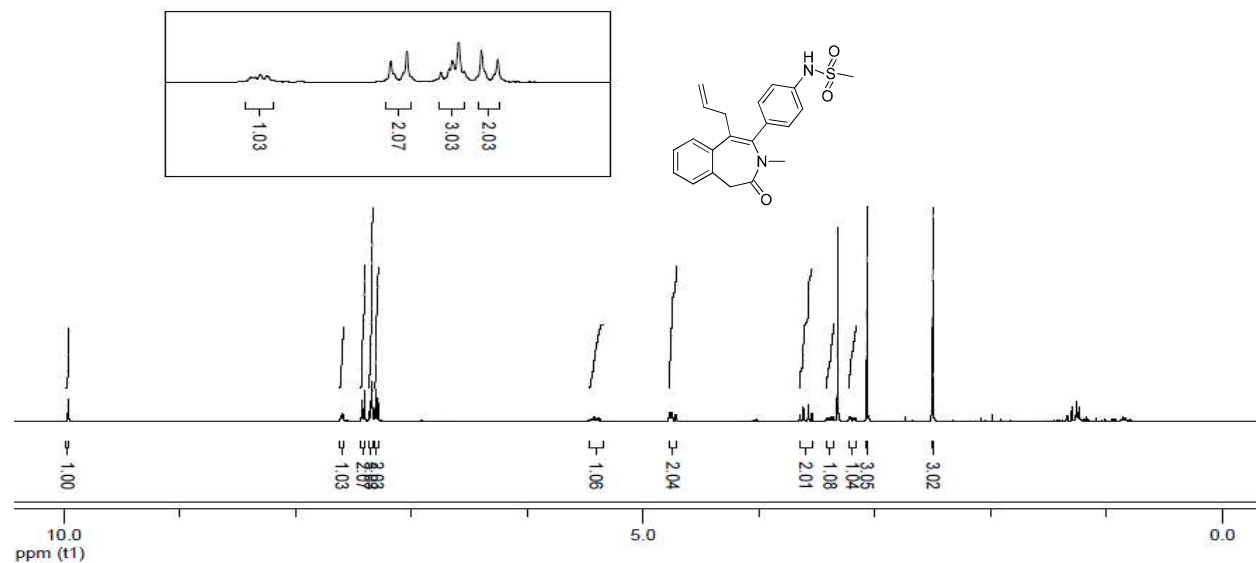

$^{13}\text{C}$  NMR spectrum (Varian, 100 MHz) of compound **4g** in  $\text{DMSO-}d_6$

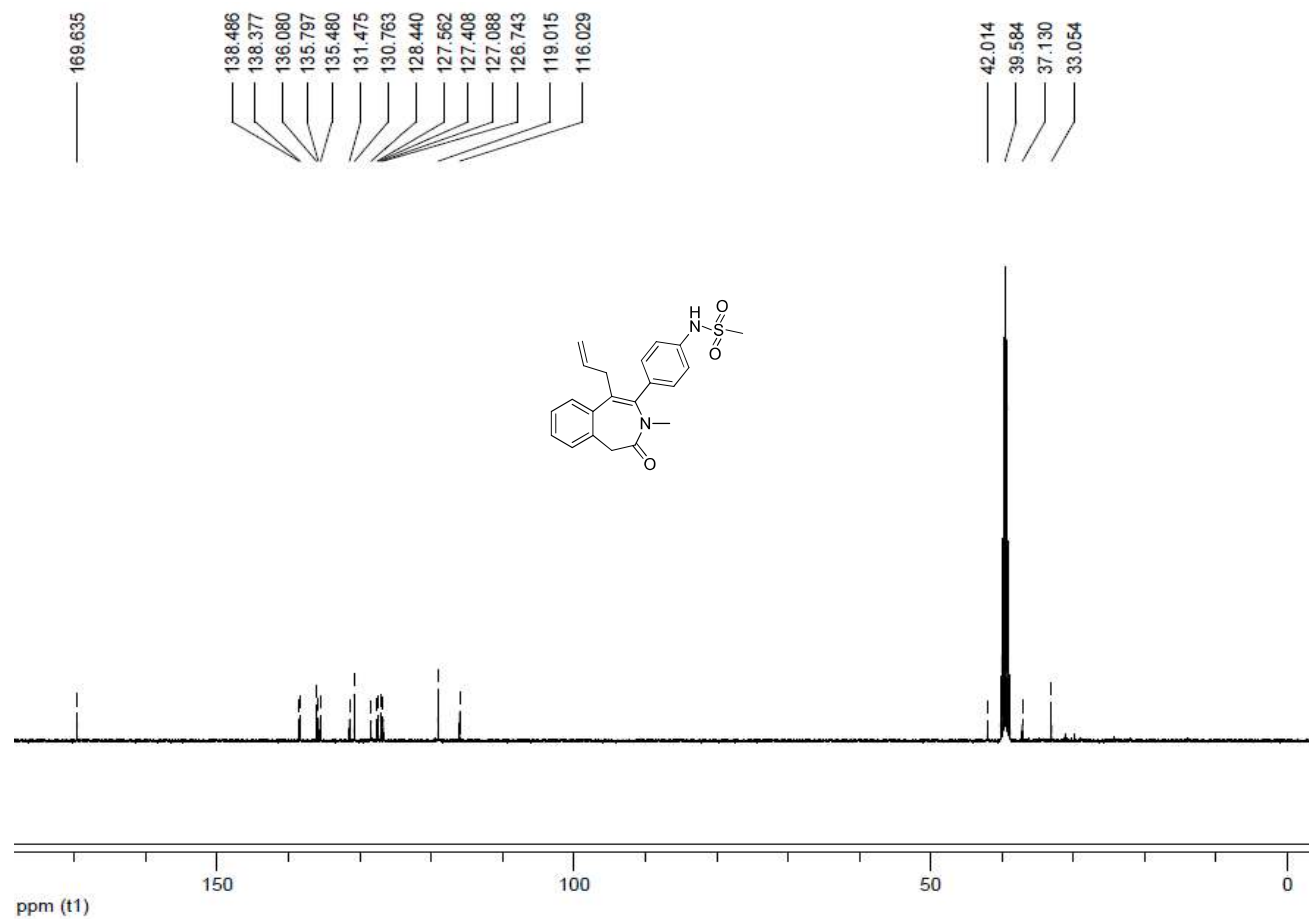

$^1\text{H}$  NMR (Varian, 400 MHz) spectrum of compound **4h** in  $\text{DMSO-}d_6$

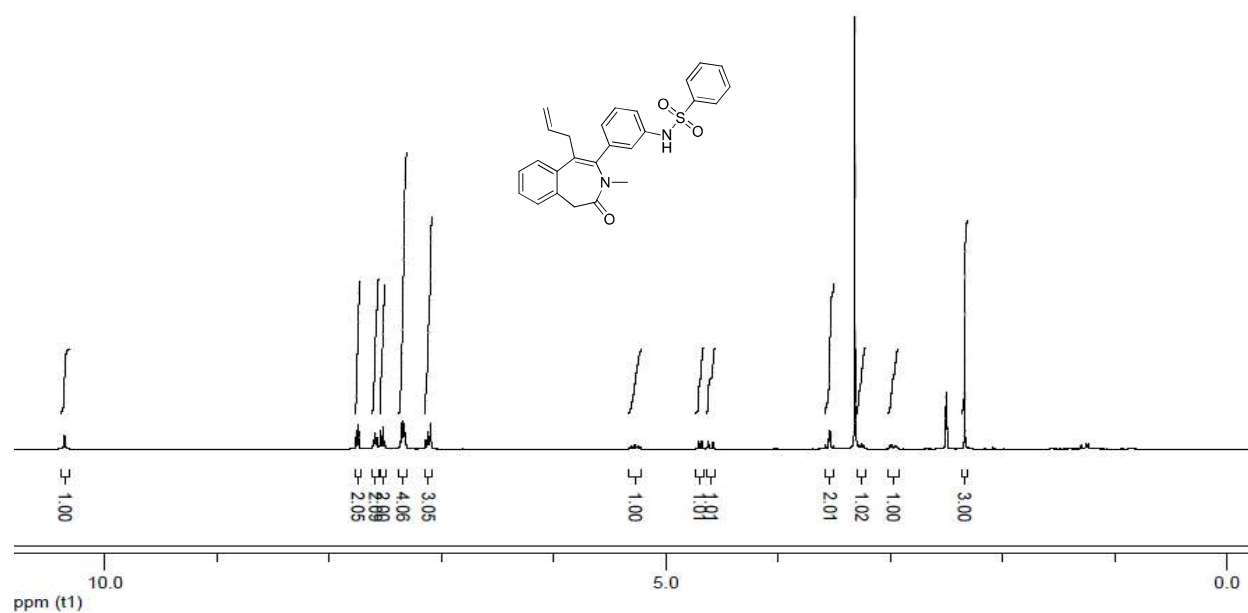

$^{13}\text{C}$  NMR spectrum (Varian, 100 MHz) of compound **4h** in  $\text{DMSO-}d_6$

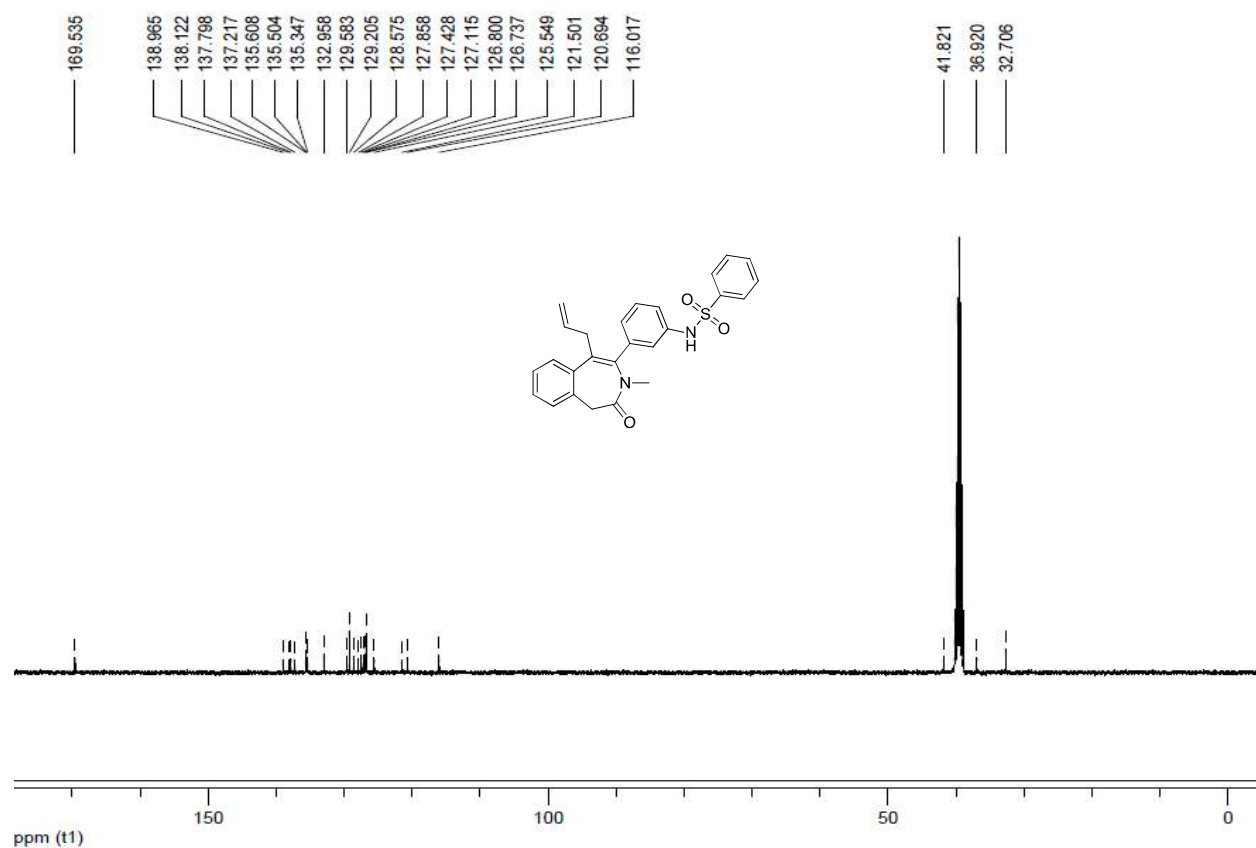

$^1\text{H}$  NMR (Varian, 400 MHz) spectrum of compound **4i** in  $\text{DMSO-}d_6$

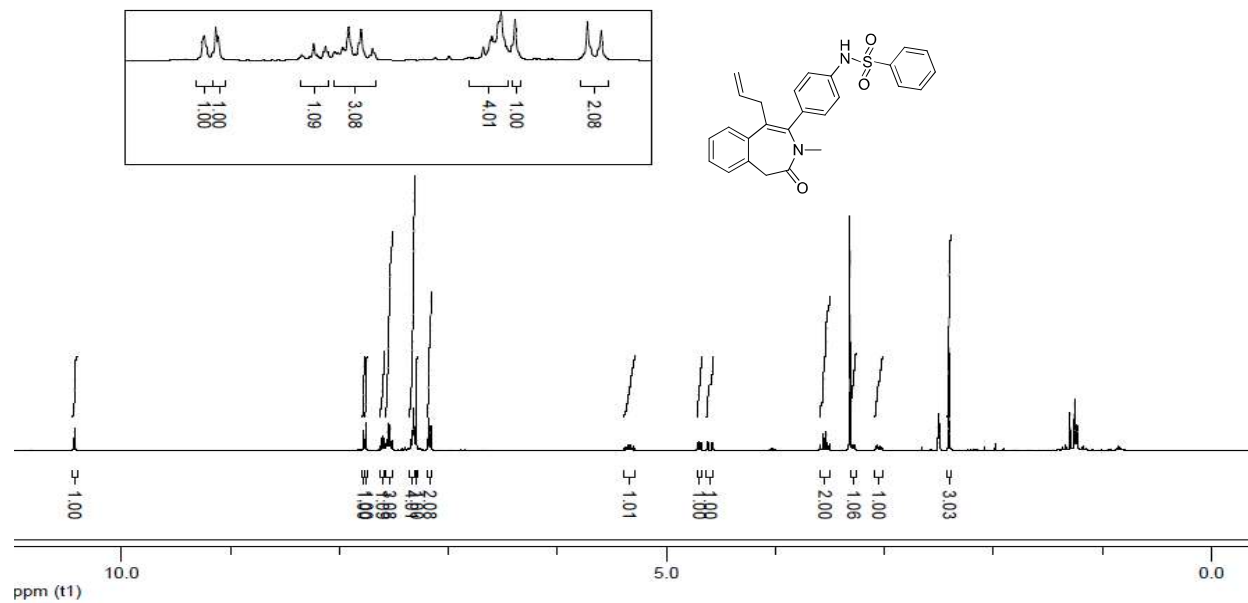

$^{13}\text{C}$  NMR spectrum (Varian, 100 MHz) of compound **4i** in  $\text{DMSO-}d_6$

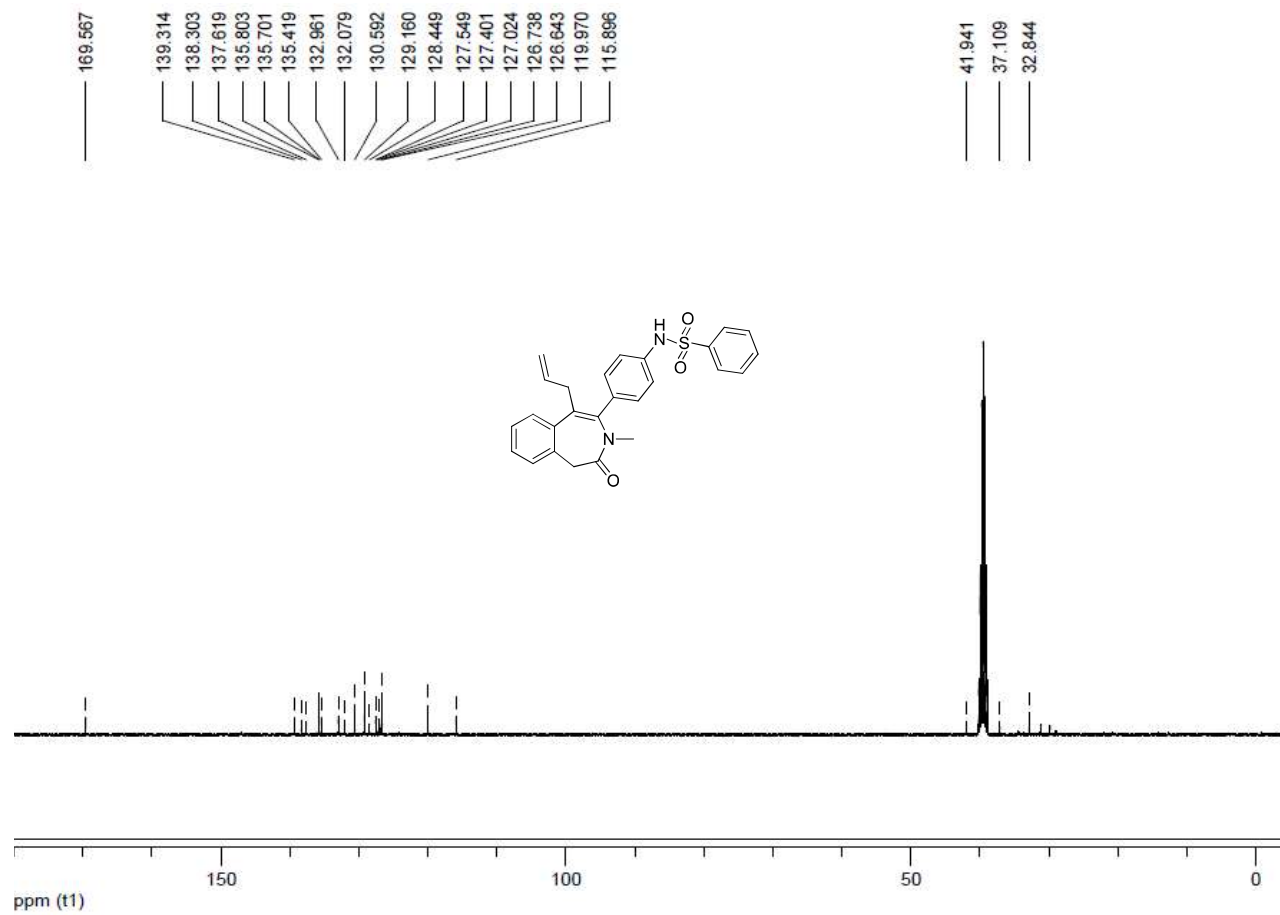

$^1\text{H}$  NMR (Varian, 400 MHz) spectrum of compound **4j** in  $\text{DMSO-}d_6$

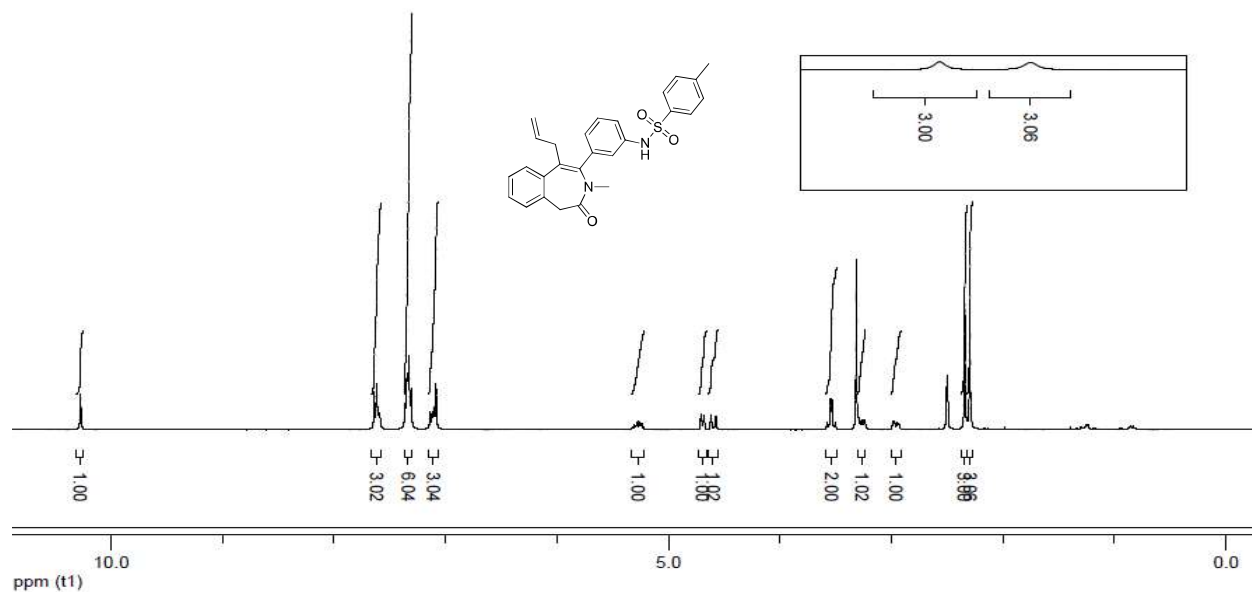

$^{13}\text{C}$  NMR spectrum (Varian, 100 MHz) of compound **4j** in  $\text{DMSO-}d_6$

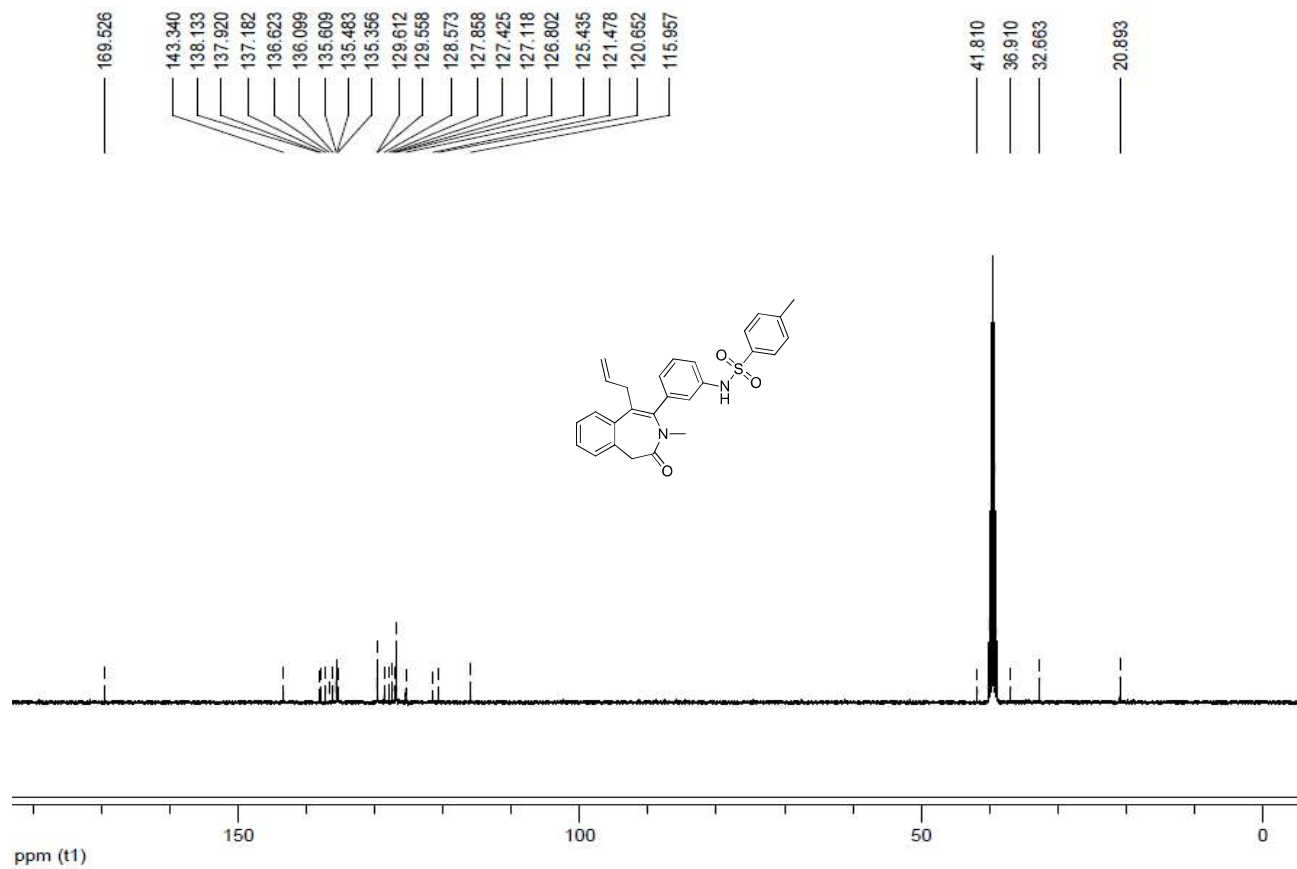

$^1\text{H}$  NMR (Varian, 400 MHz) spectrum of compound **4k** in  $\text{DMSO-}d_6$

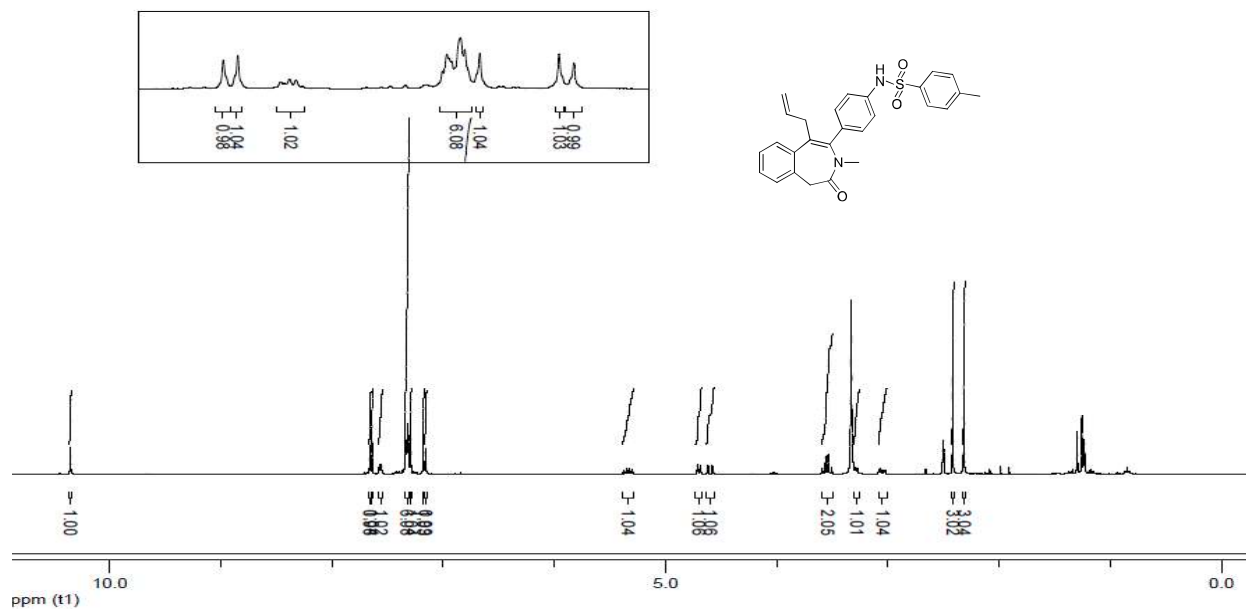

$^{13}\text{C}$  NMR spectrum (Varian, 100 MHz) of compound **4k** in  $\text{DMSO-}d_6$

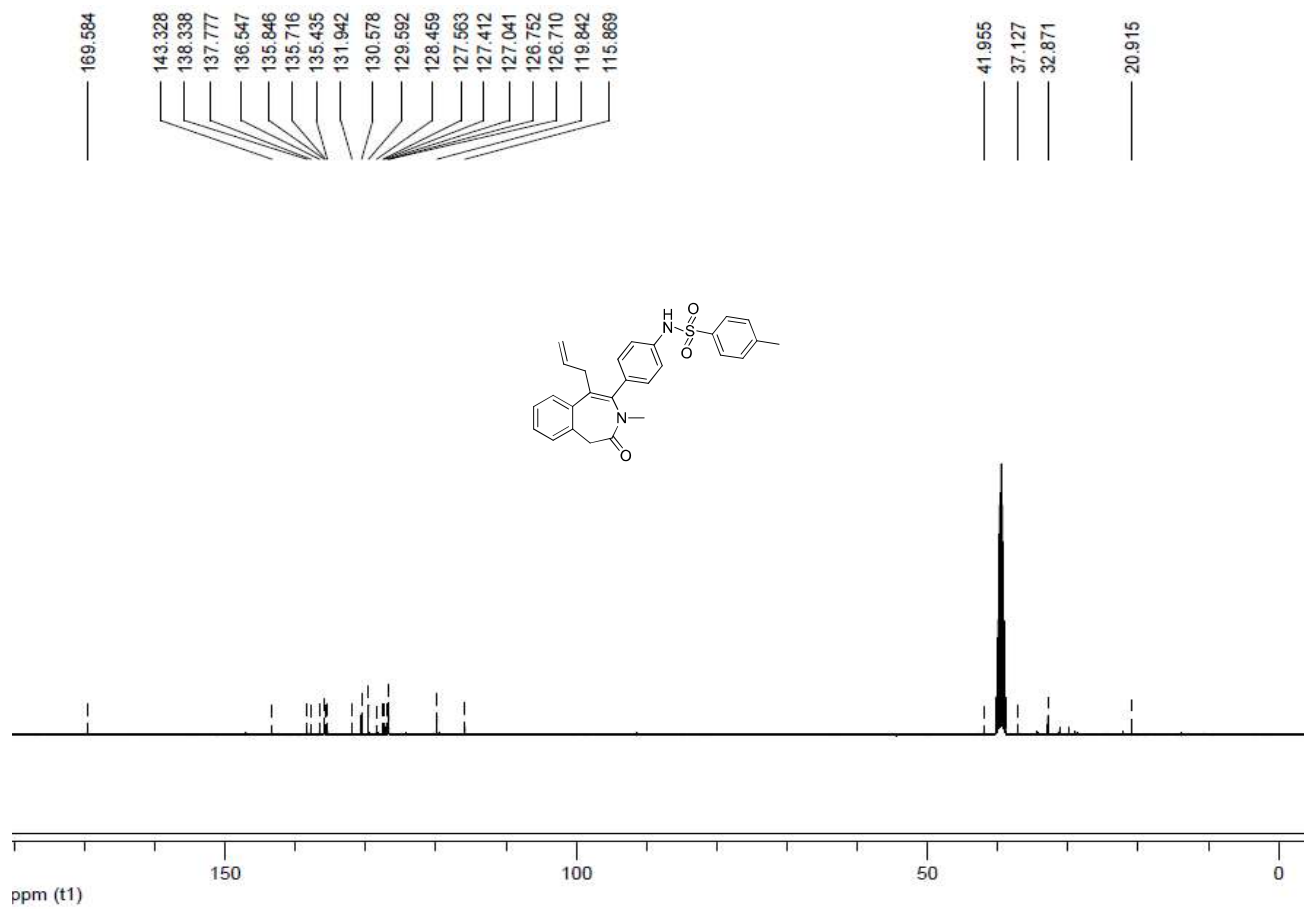

$^1\text{H}$  NMR (Varian, 400 MHz) spectrum of compound **4I** in  $\text{DMSO-}d_6$

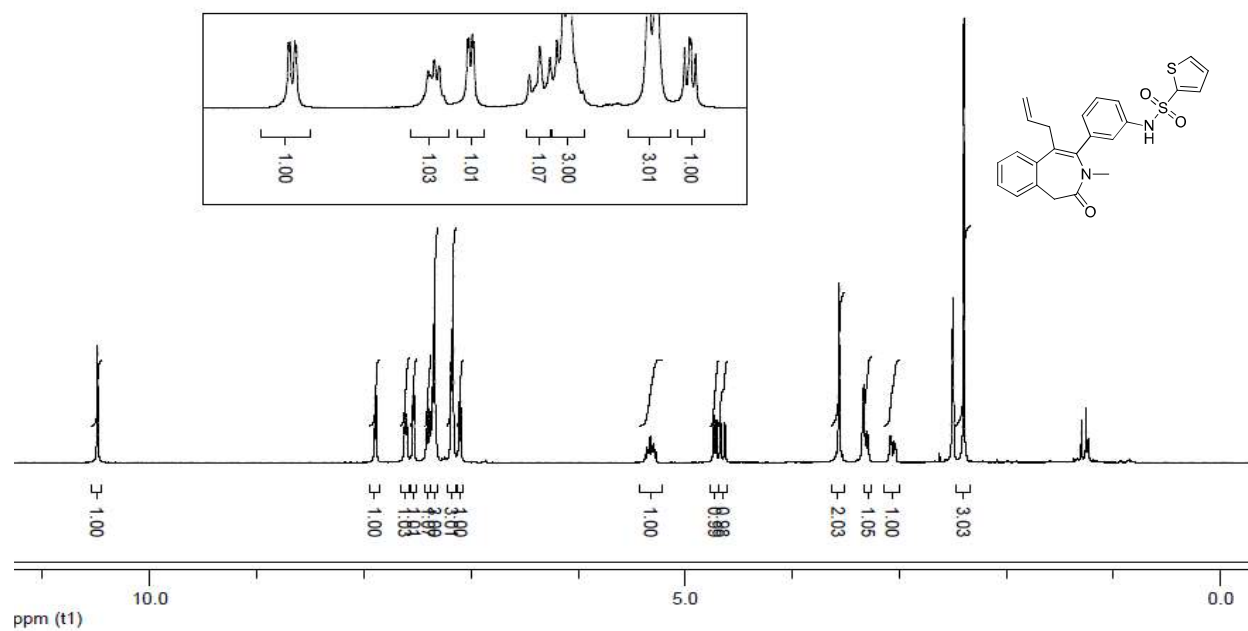

$^{13}\text{C}$  NMR spectrum (Varian, 100 MHz) of compound **4I** in  $\text{DMSO-}d_6$

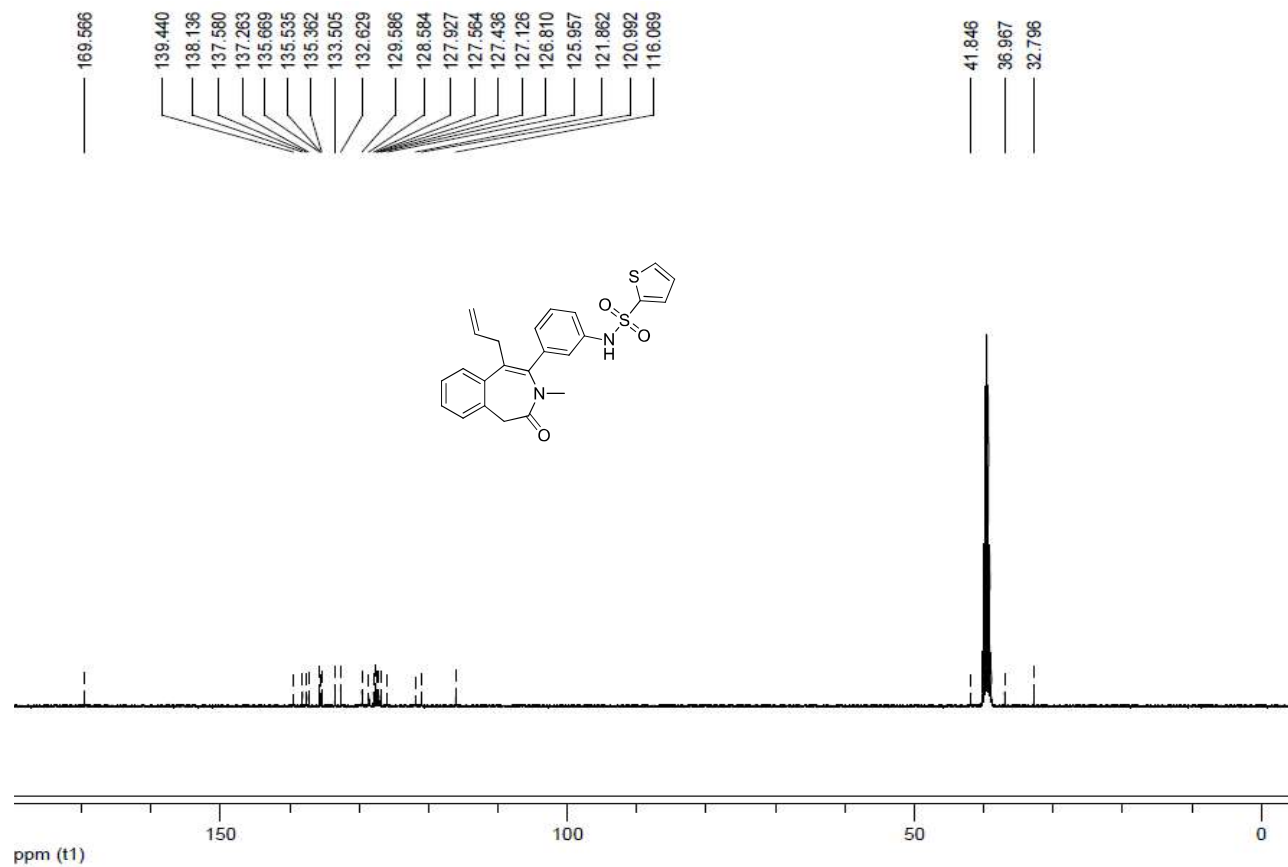



$^1\text{H}$  NMR (Varian, 400 MHz) spectrum of compound **4m** in  $\text{DMSO-}d_6$

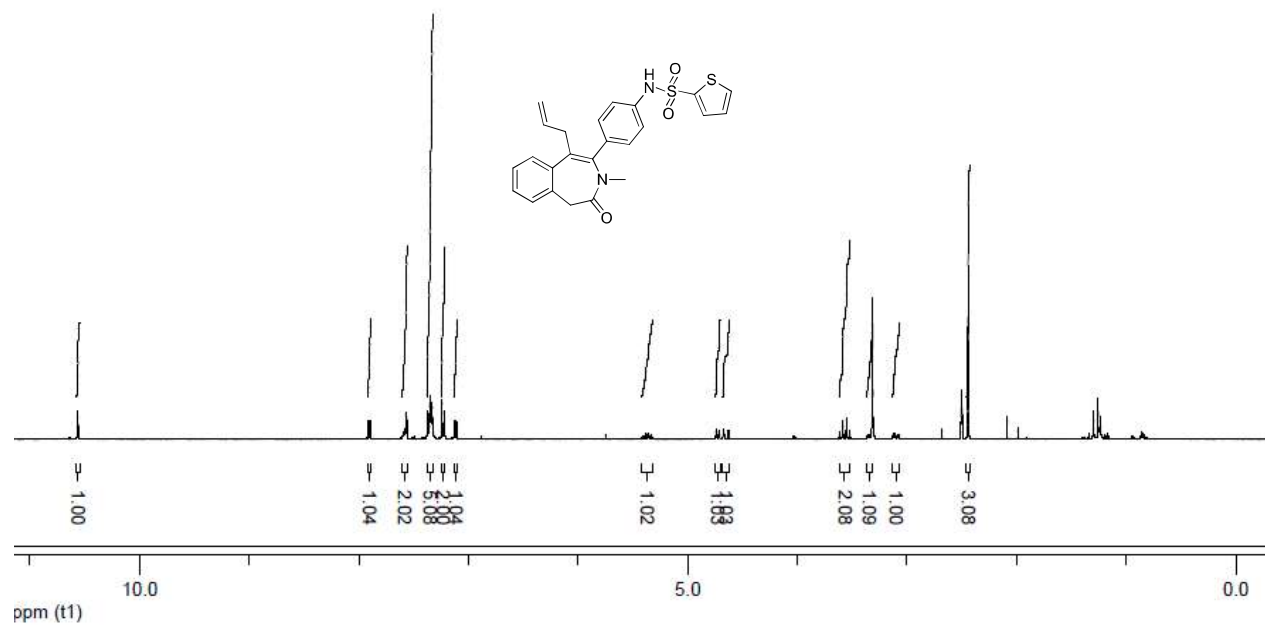

$^{13}\text{C}$  NMR spectrum (Varian, 100 MHz) of compound **4m** in  $\text{DMSO-}d_6$

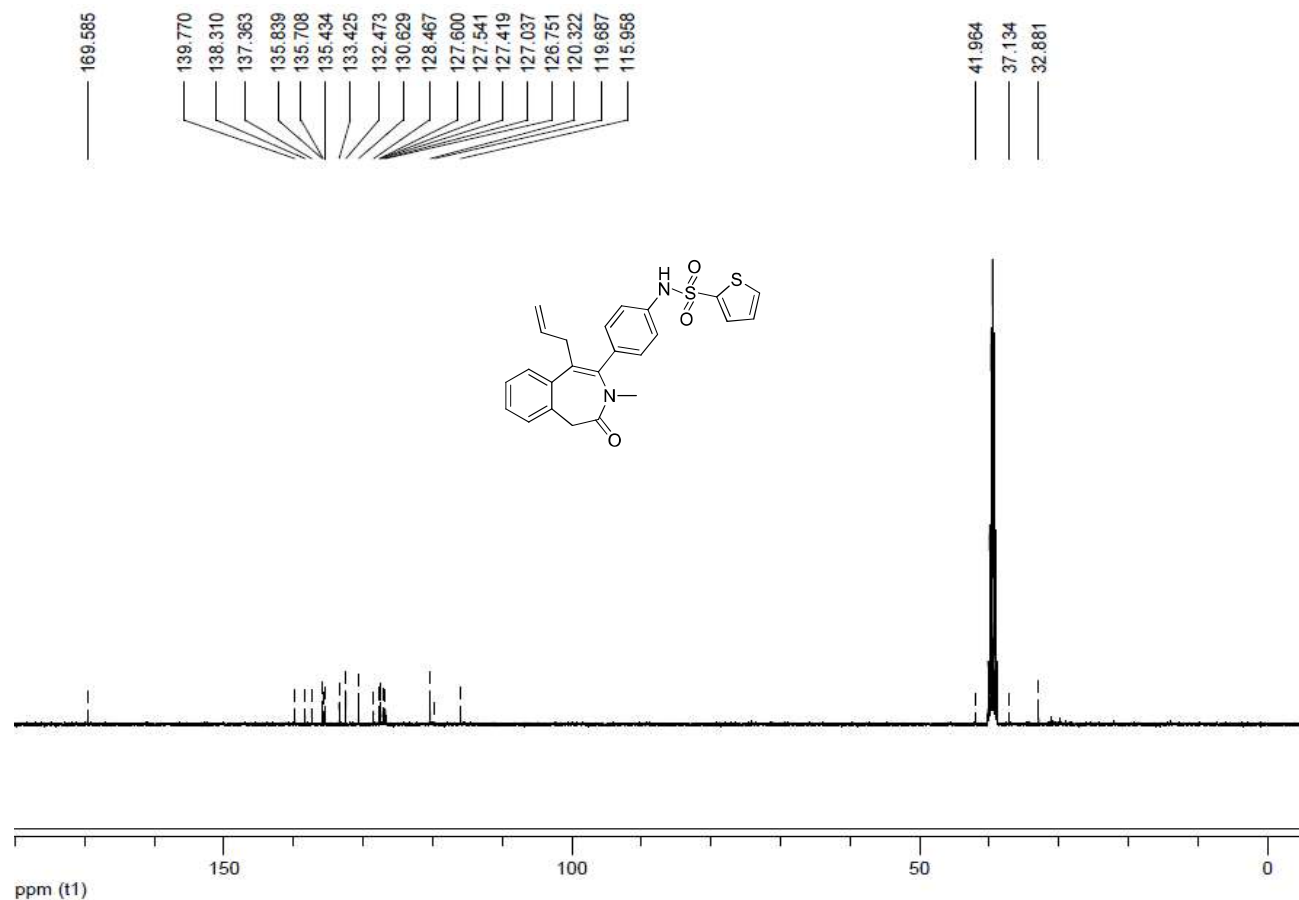

$^1\text{H}$  NMR (Varian, 400 MHz) spectrum of compound **4n** in  $\text{DMSO-}d_6$

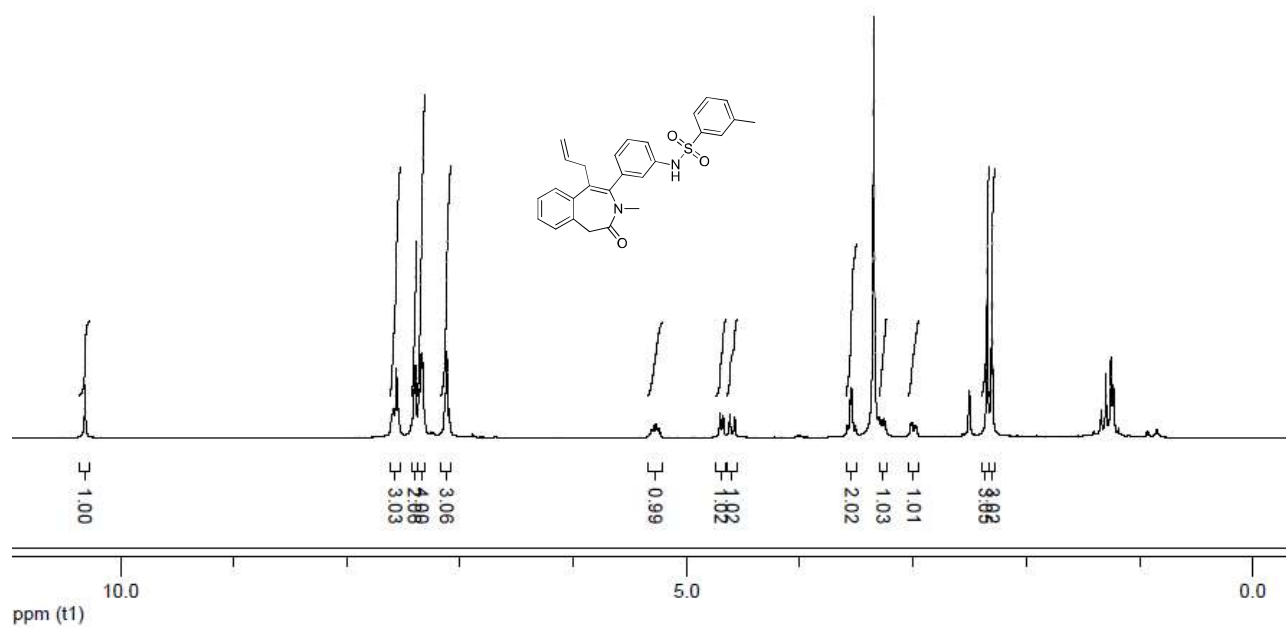

$^{13}\text{C}$  NMR spectrum (Varian, 100 MHz) of compound **4n** in  $\text{DMSO-}d_6$

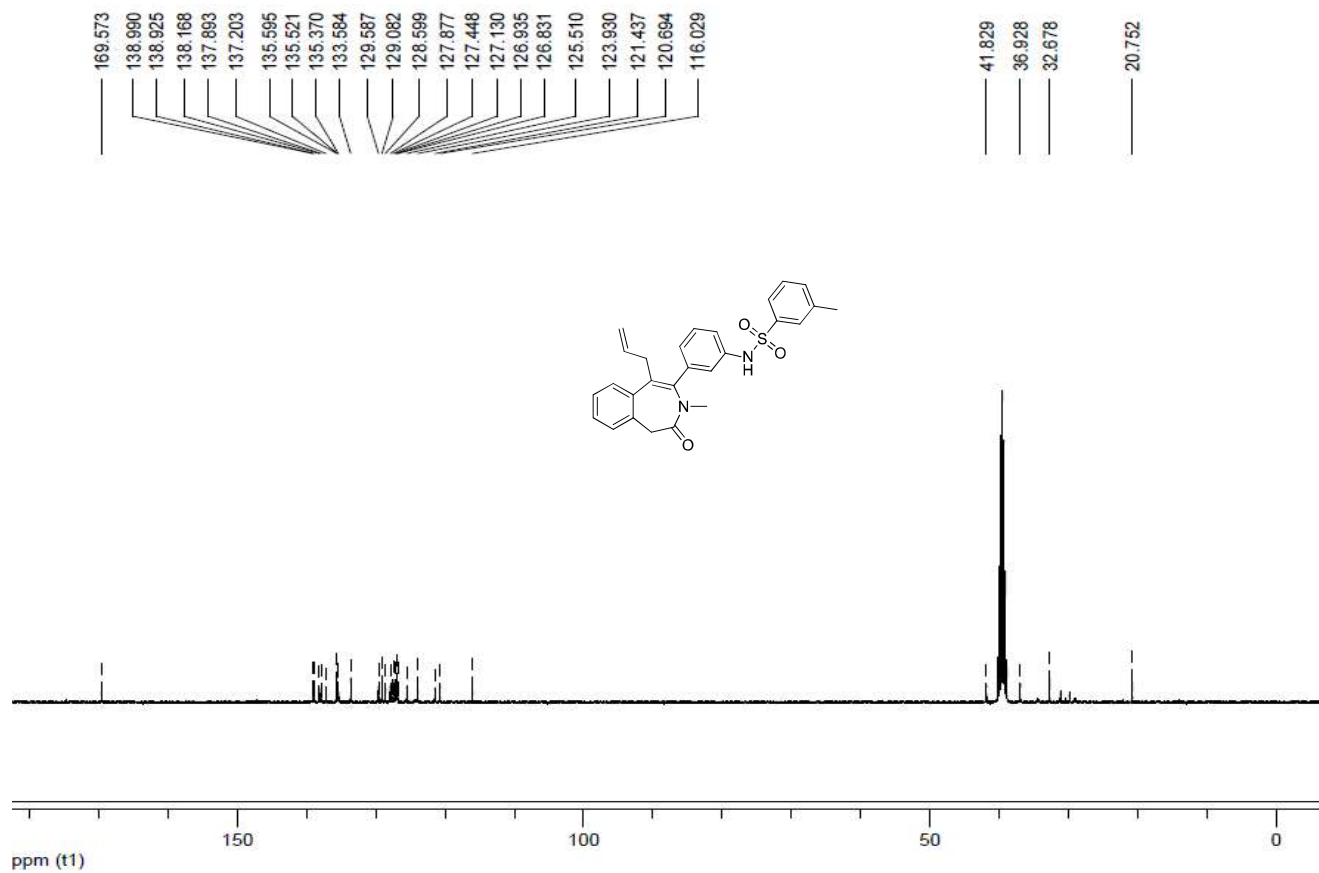

$^1\text{H}$  NMR (Varian, 400 MHz) spectrum of compound **5a** in  $\text{DMSO-}d_6$

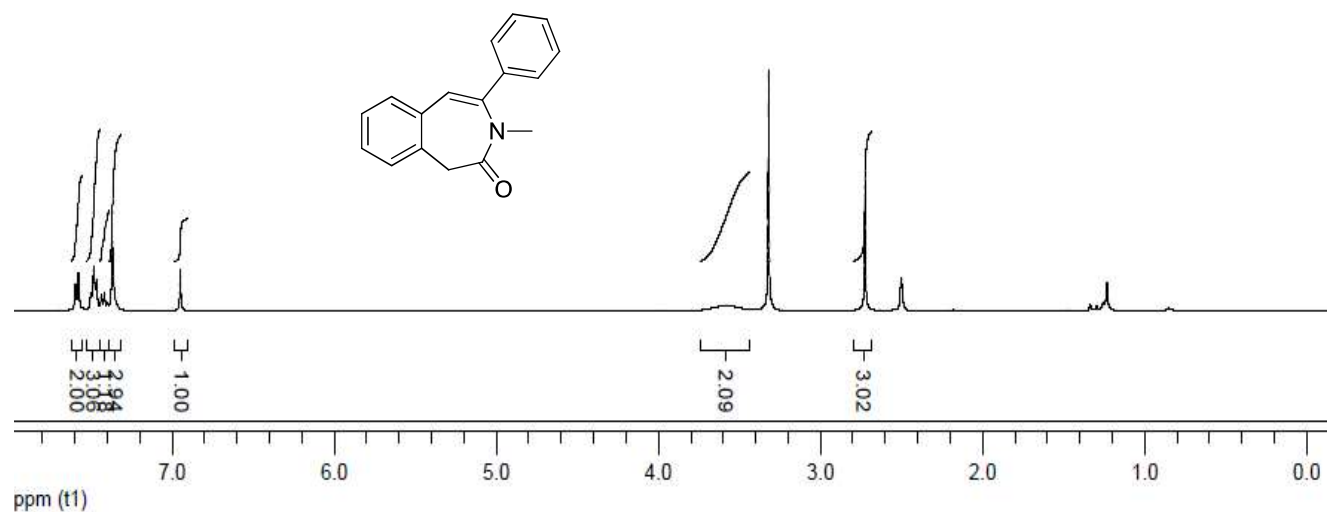

$^{13}\text{C}$  NMR spectrum (Varian, 100 MHz) of compound **5a** in  $\text{DMSO-}d_6$

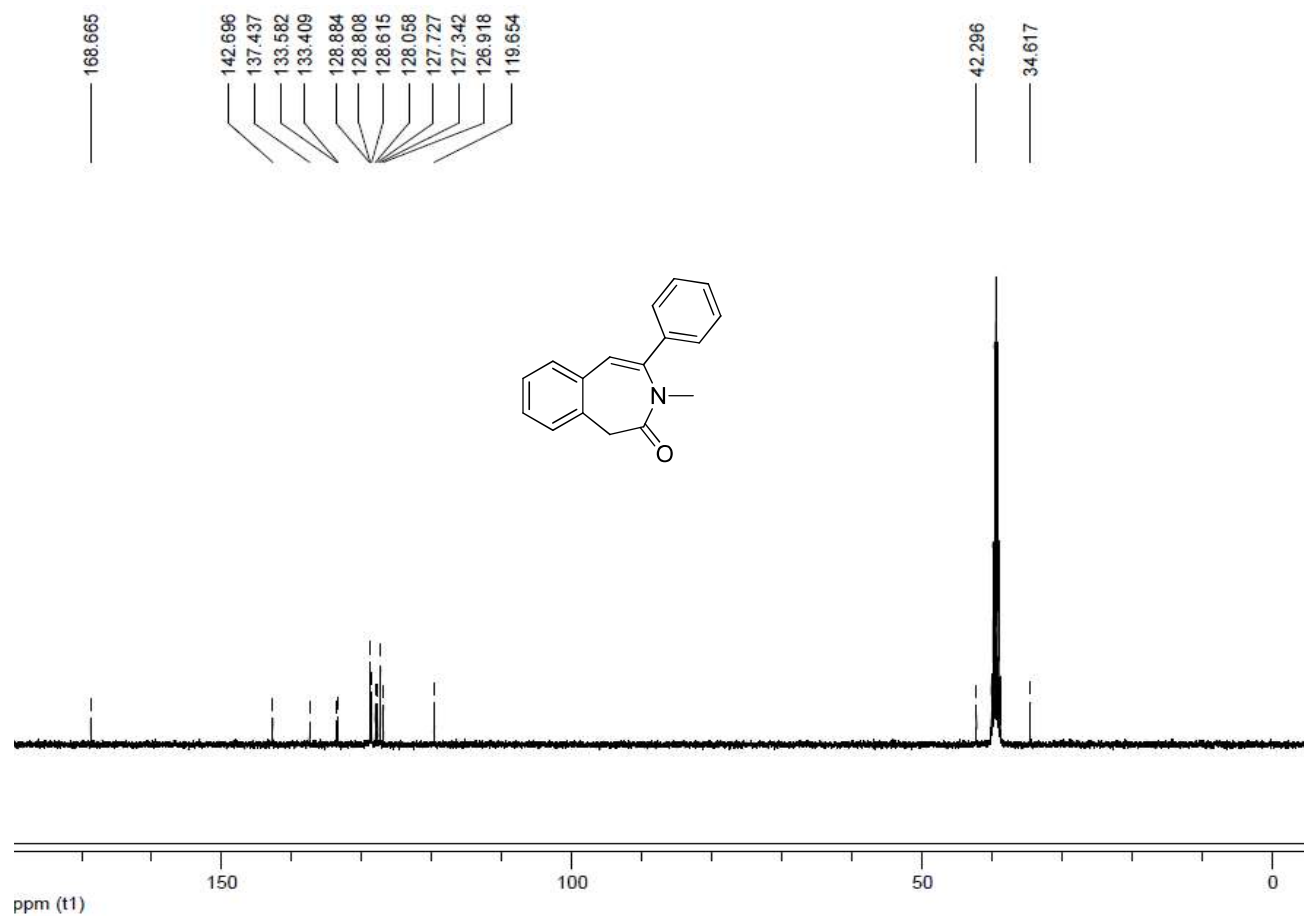

# Mass spectra of compound 1aa

**Sample Name** ILS-BTG-3-Eth-Ms **Position** Vial 52 **Instrument Name** LCMS **User Name**  
**Inj Vol** 3 **InjPosition** **SampleType** Sample **IRM Calibration Status** Not Applicable  
**Data Filename** 210819M015.d **ACQ Method** MMI-SM.m **Comment** MM19H034 **Acquired Time** 8/21/2019 1:00:08 PM

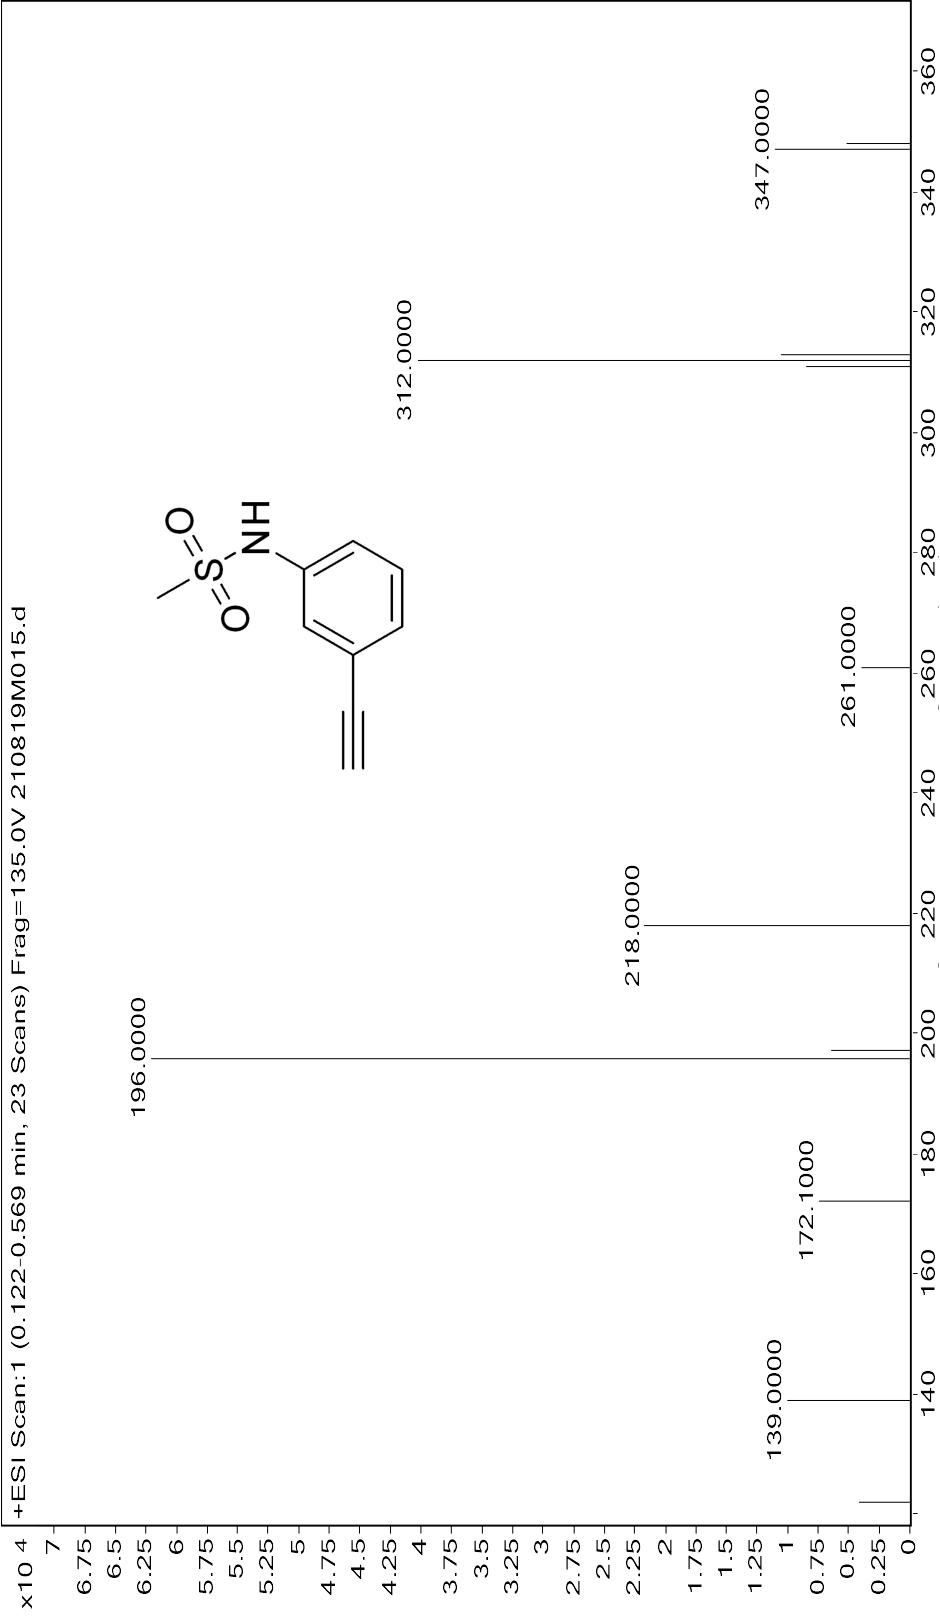

# Mass spectra of compound lab

**Sample Name** ILS-BTG-4-Eth-MS **Position** Vial 46 **Instrument Name** LCMS **User Name**  
**Inj Vol** 5 **InjPosition** **SampleType** Sample **IRM Calibration Status** Not Applicable  
**Data Filename** 270919M006A.d **ACQ Method** MMI-SM.m **Comment** MM19I066 **Acquired Time** 9/27/2019 11:24:01 AM

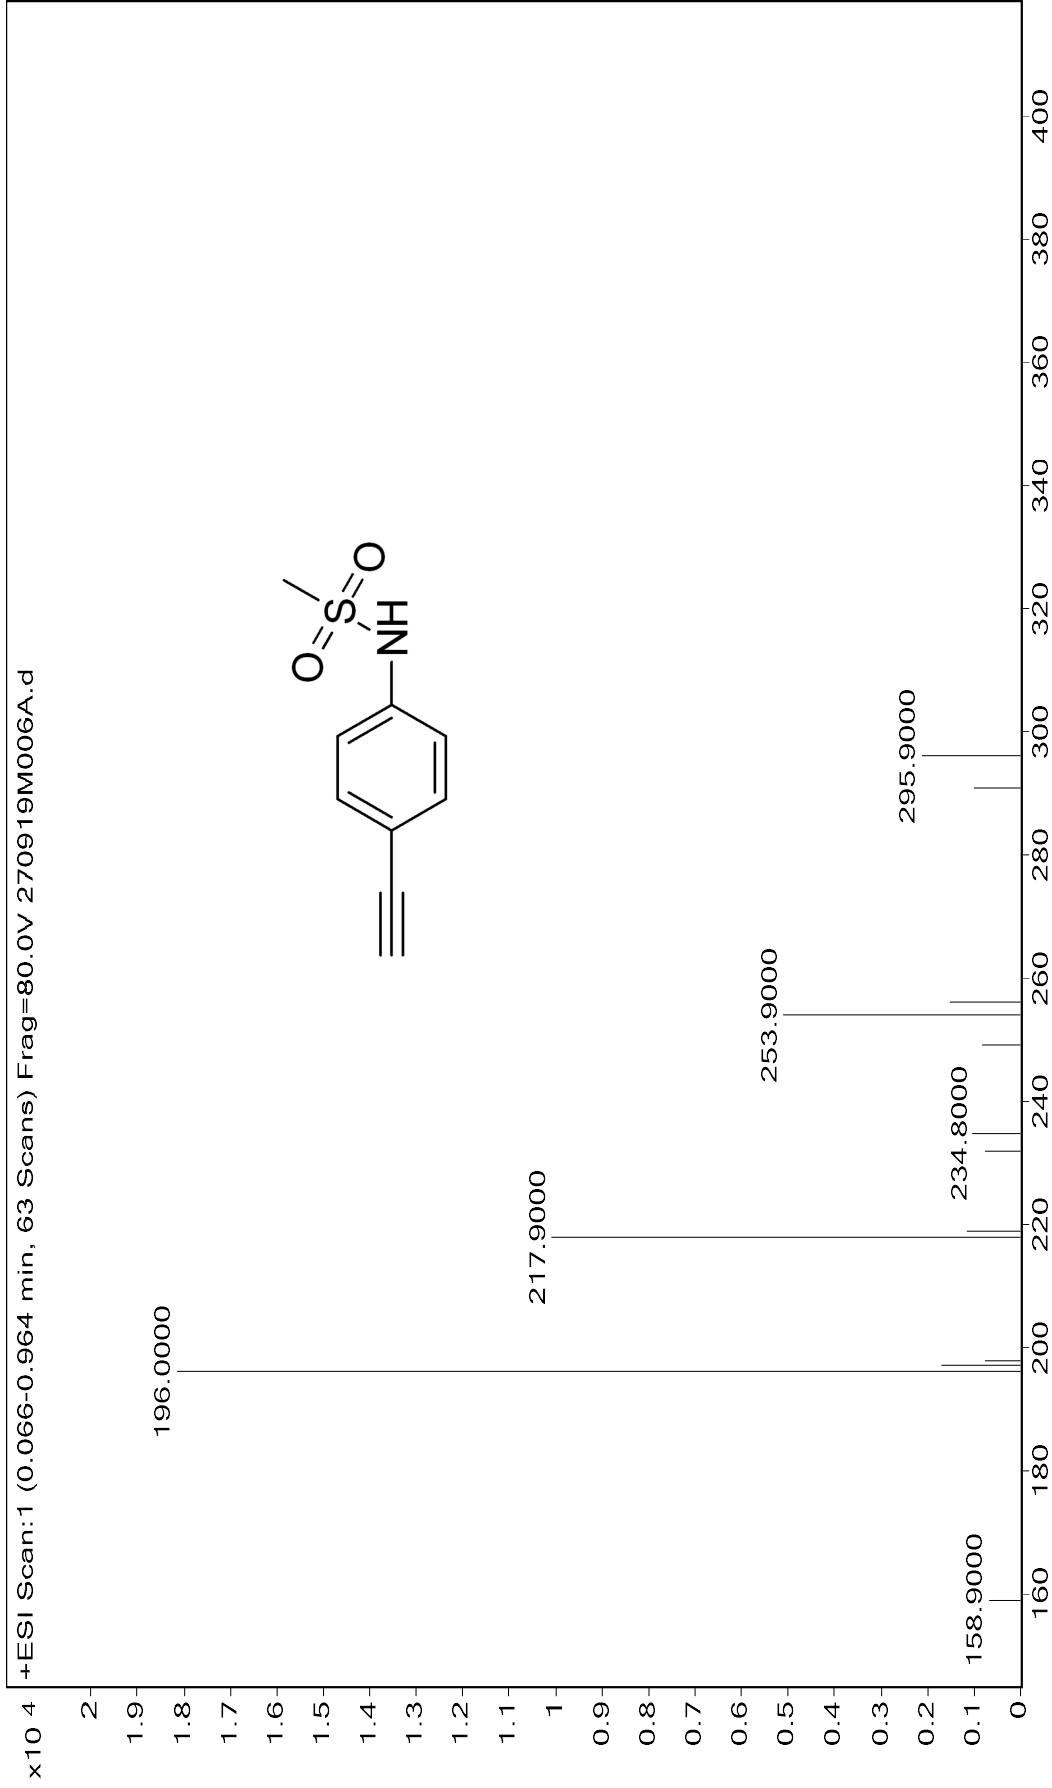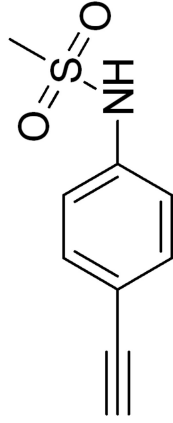

# Mass spectra of compound lac

**Sample Name** ILS-BTG-3-Eth-BS      **Position** Vial 9      **User Name** Not Applicable  
**Inj Vol** 3      **InjPosition**      **IRM Calibration Status**  
**Data Filename** 220819M007.d      **ACQ Method** MMI-SM.m      **Acquired Time** 8/22/2019 11:16:56 AM

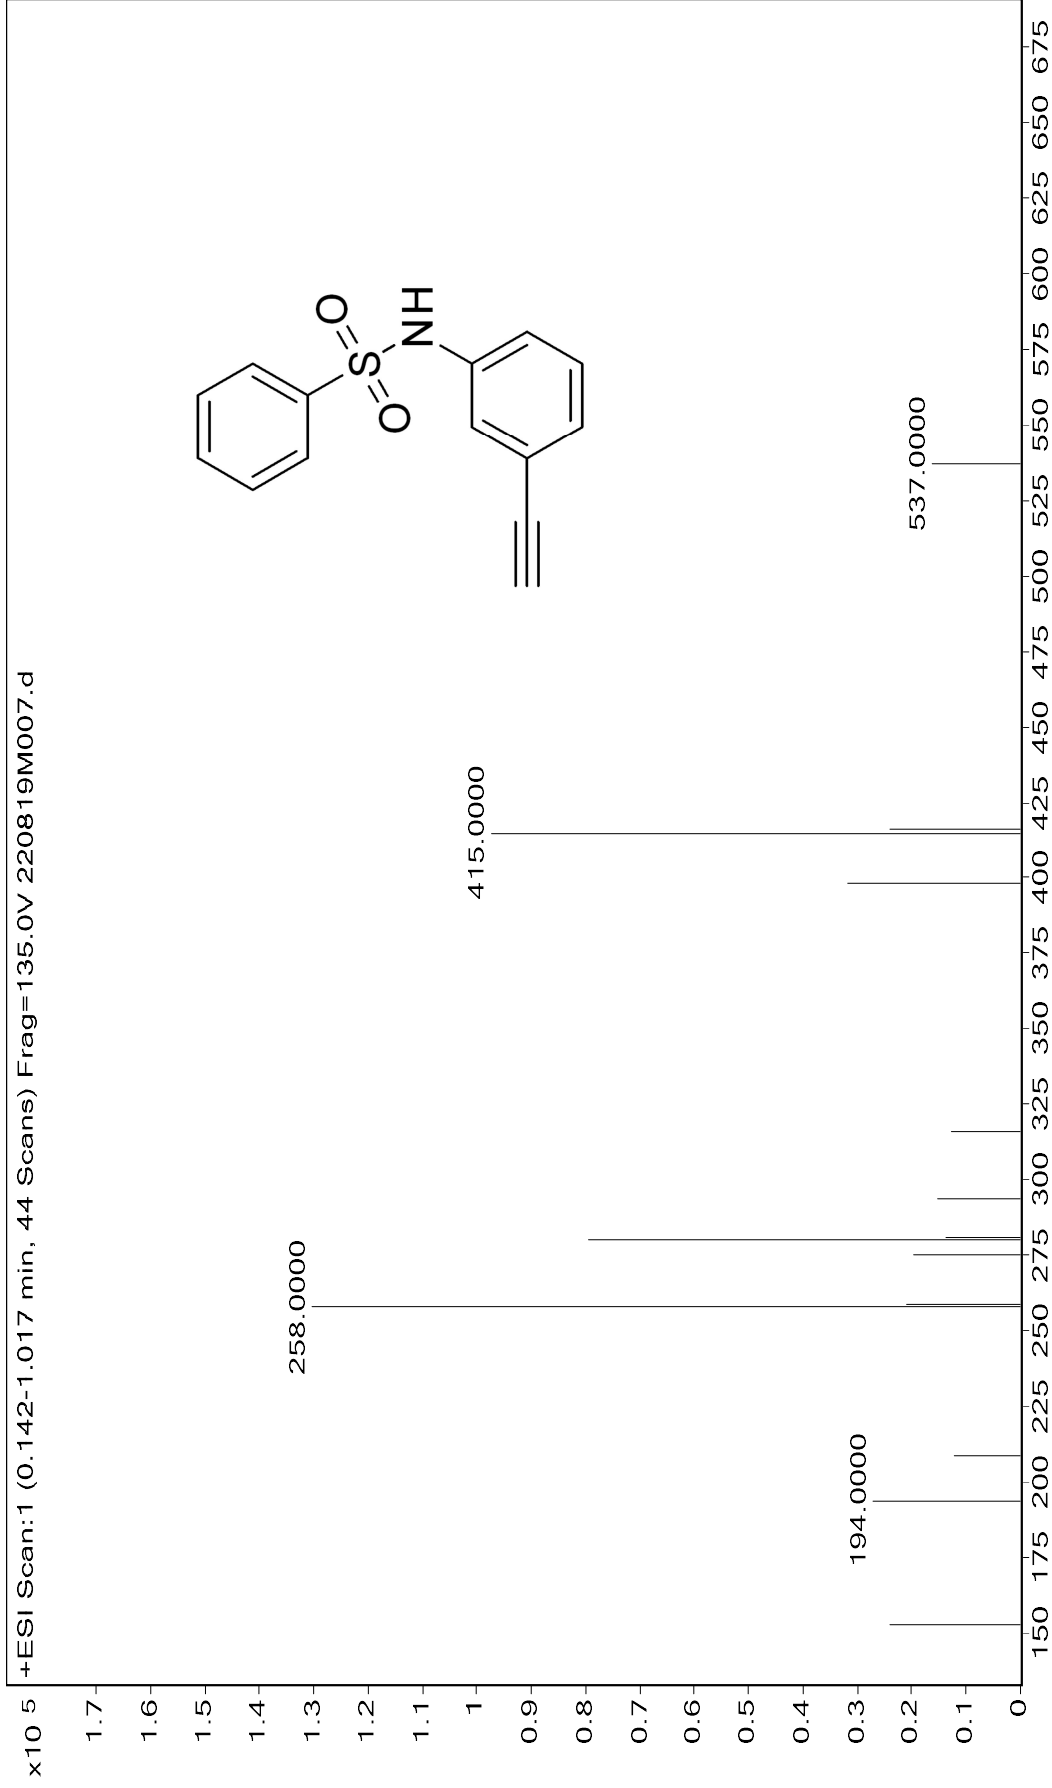

# Mass spectra of compound lad

**Sample Name** ILS/BTG/4-ETH/BS **Position** Vial 11 **User Name**  
**Inj Vol** 1 **InjPosition** **Instrument Name** LCMS **IRM Calibration Status** Not Applicable  
**Data Filename** 300919M009.d **ACQ Method** MMI-SM.m **Sample Comment** MMI19I070 **Acquired Time** 9/30/2019 4:47:53 PM

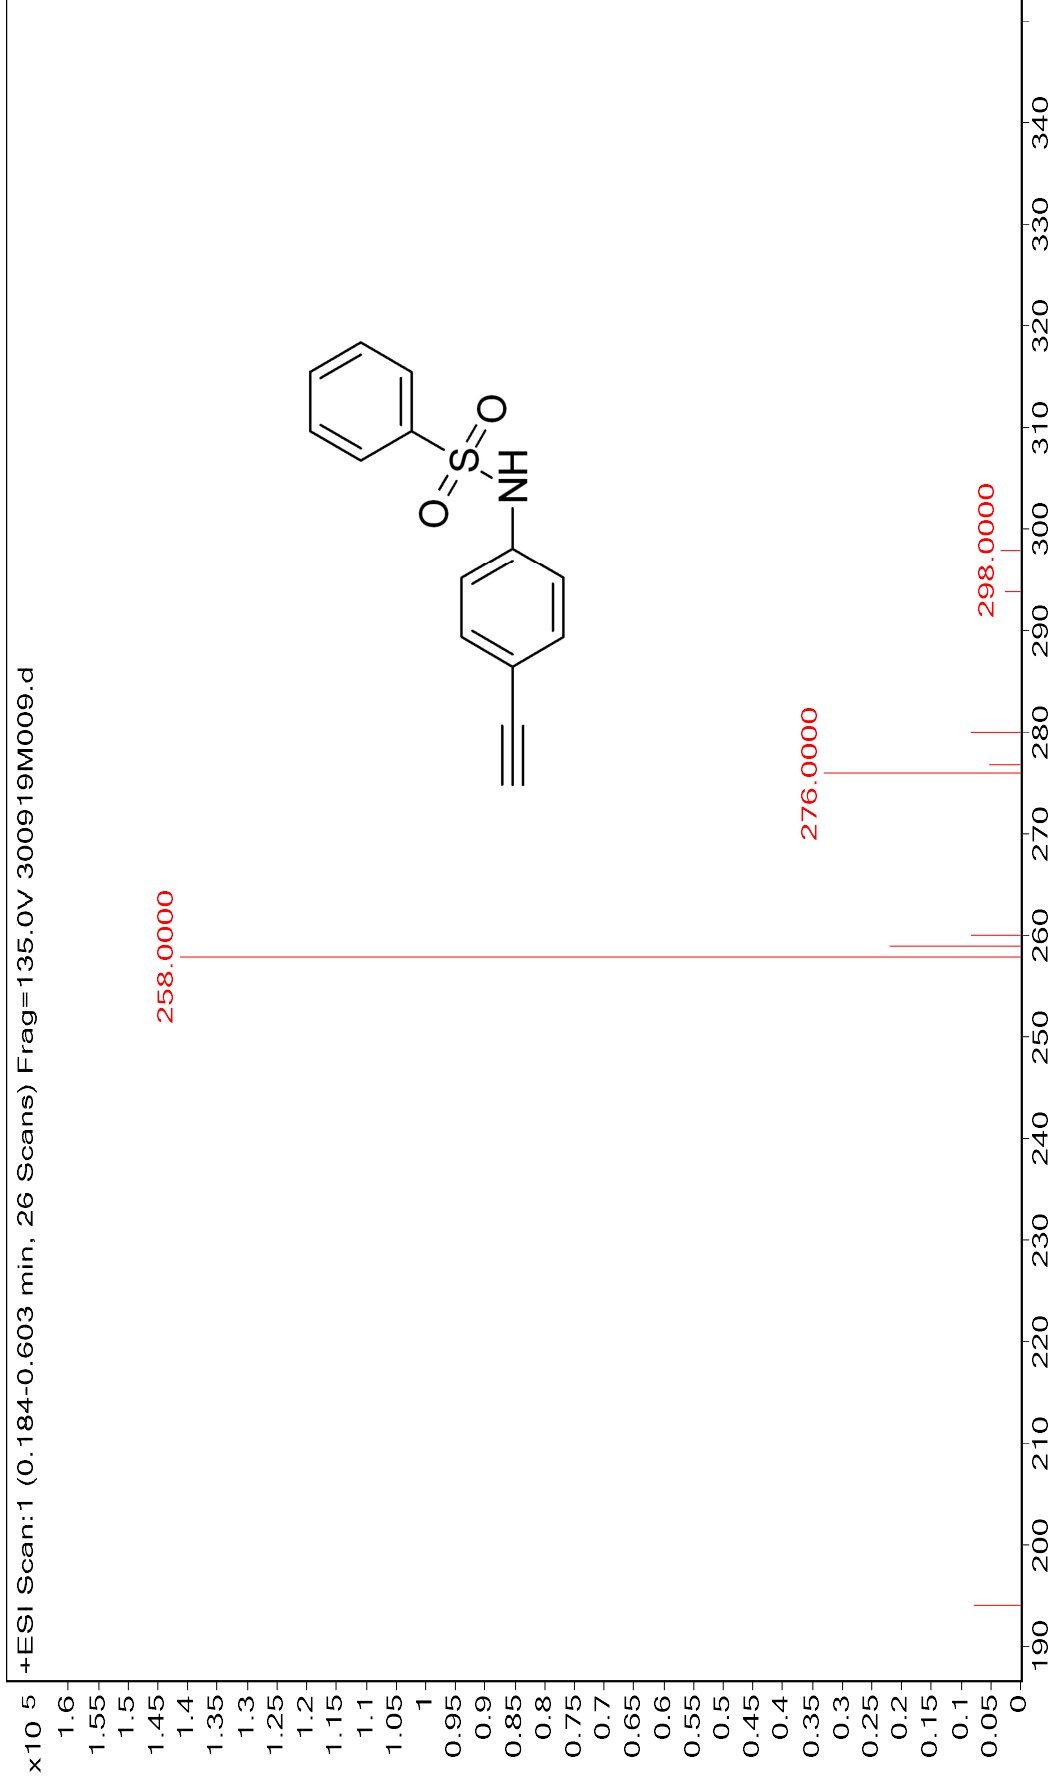

# Mass spectra of compound lae

**Sample Name** ILS-BTG-3-Eth-TS    **Position** Vial 10    **User Name**    **IRM Calibration Status** Not Applicable  
**Inj Vol** 3    **InjPosition**    **Instrument Name** LCMS Sample    **Acquired Time** 8/22/2019 11:17:56 AM  
**Data Filename** 220819M008.d    **ACQ Method** MMI-SM,m    **SampleType** MMI19H043

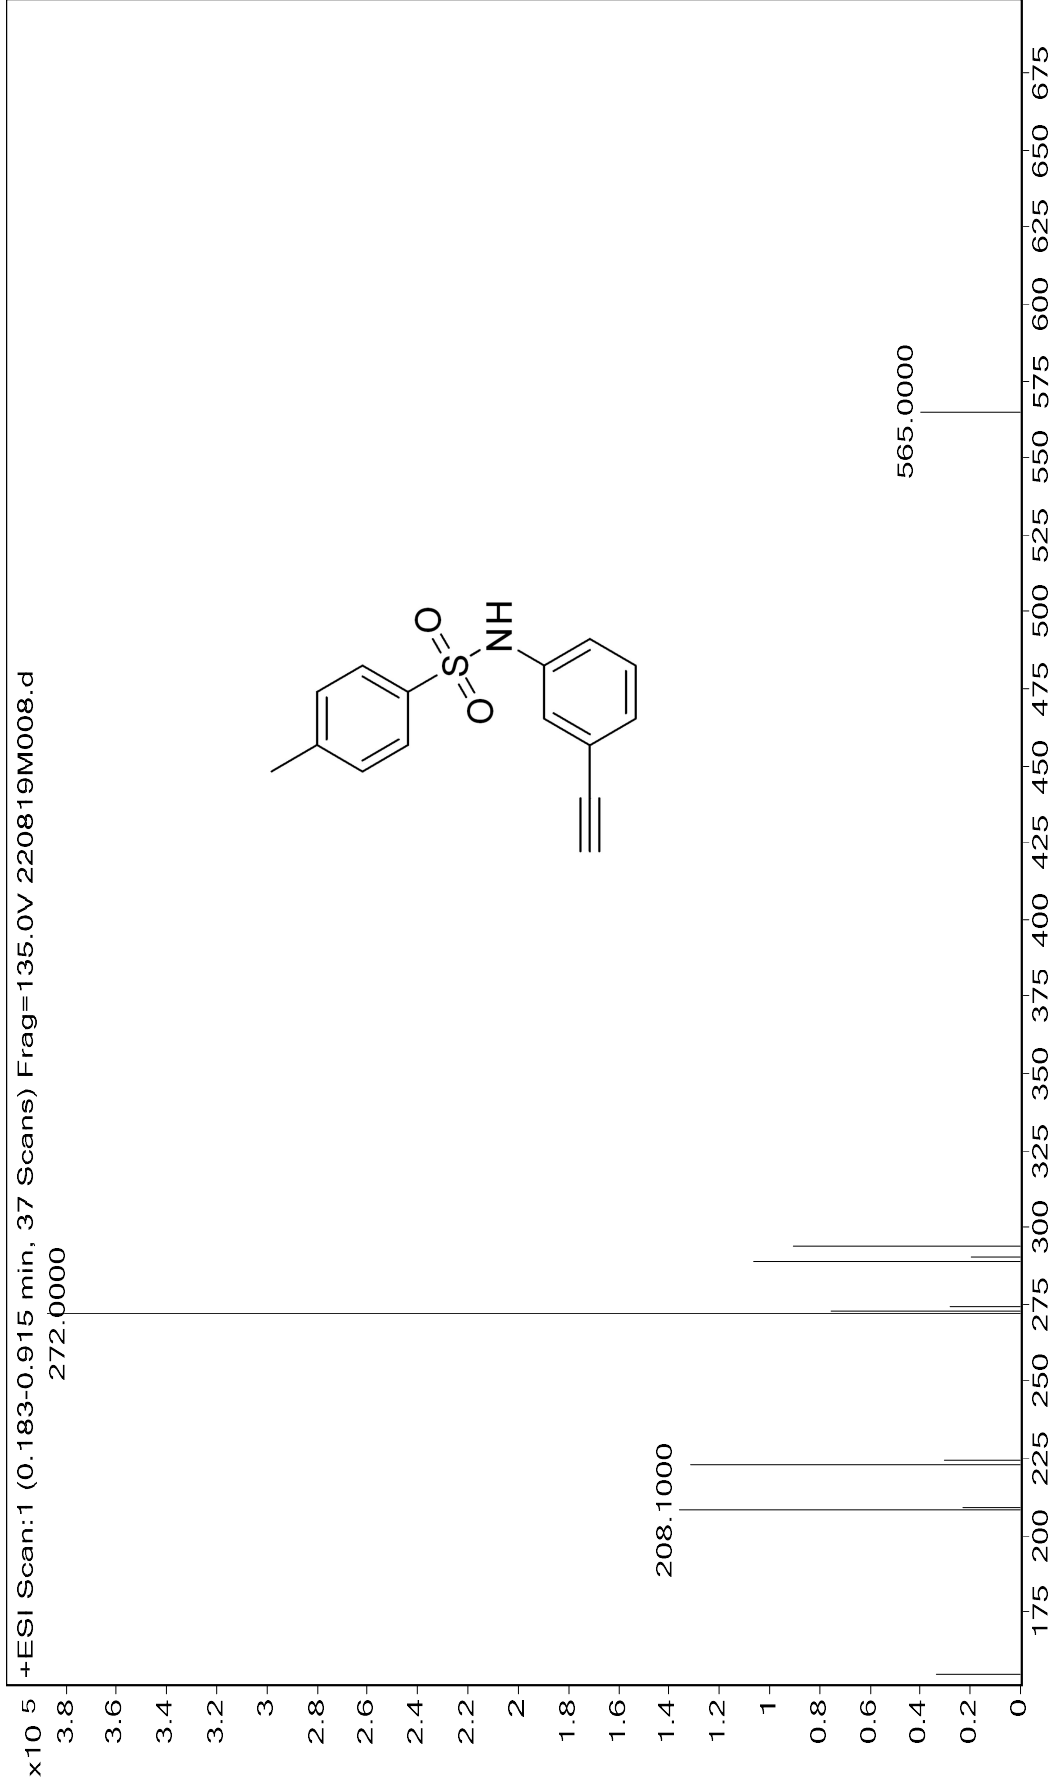



# Mass spectra of compound 1af

**Sample Name** ILS-BTG-4-Eth-TS    **Position** Vial 12    **Instrument Name** LCMS    **User Name**  
**Inj Vol** 3    **InjPosition**    **SampleType** Sample    **IRM Calibration Status** Not Applicable  
**Data Filename** 260819M016.d    **ACQ Method** MMI-SM,m    **Comment** MM19H052    **Acquired Time** 8/26/2019 5:11:42 PM

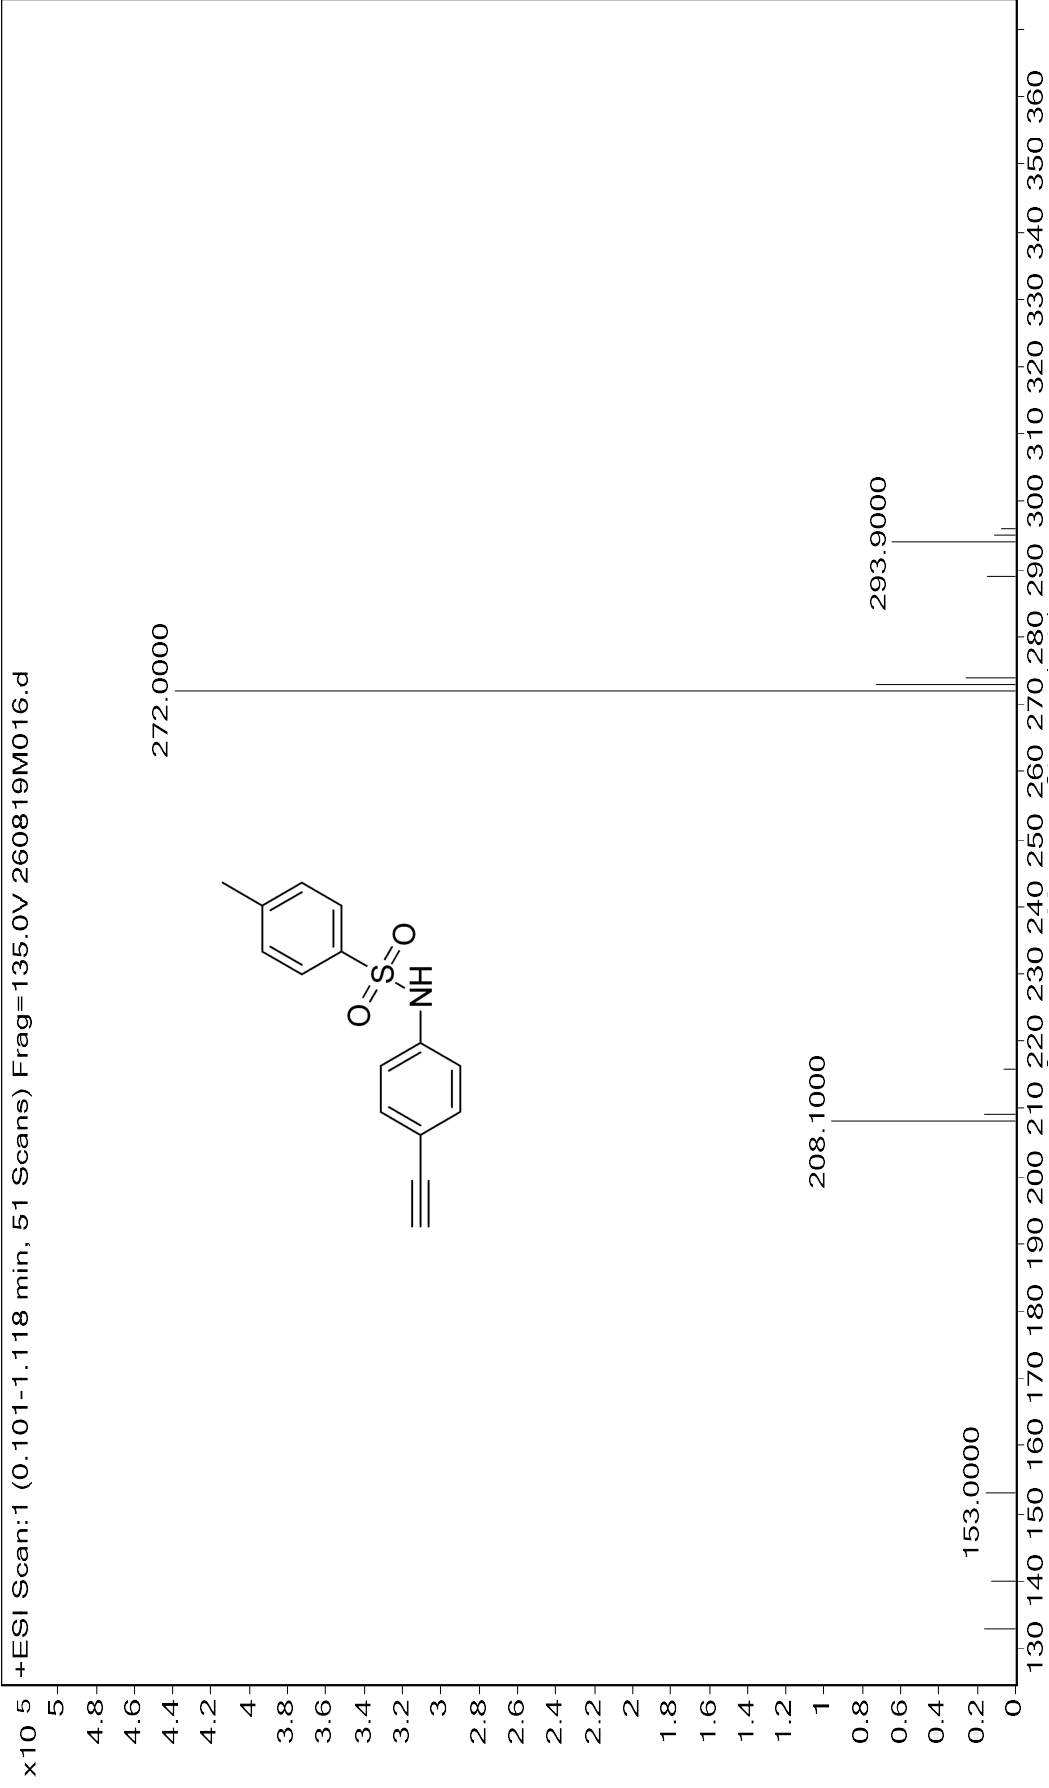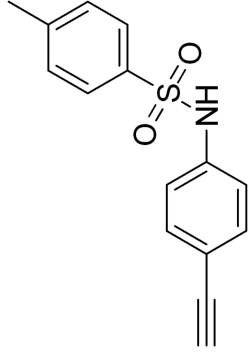

# Mass spectra of compound lag

Sample Name ILS-BTG-3-Eth-TPS Position Vial 26 Instrument Name LCMS User Name  
Inj Vol 5 InjPosition ACQ Method MMI-SM,m Comment Sample MM19H046 IRM Calibration Status Not Applicable  
Data Filename 220819M029A.d ACQ Method MMI-SM,m Comment Sample MM19H046 IRM Calibration Status Not Applicable  
Acquired Time 8/22/2019 5:48:14 PM

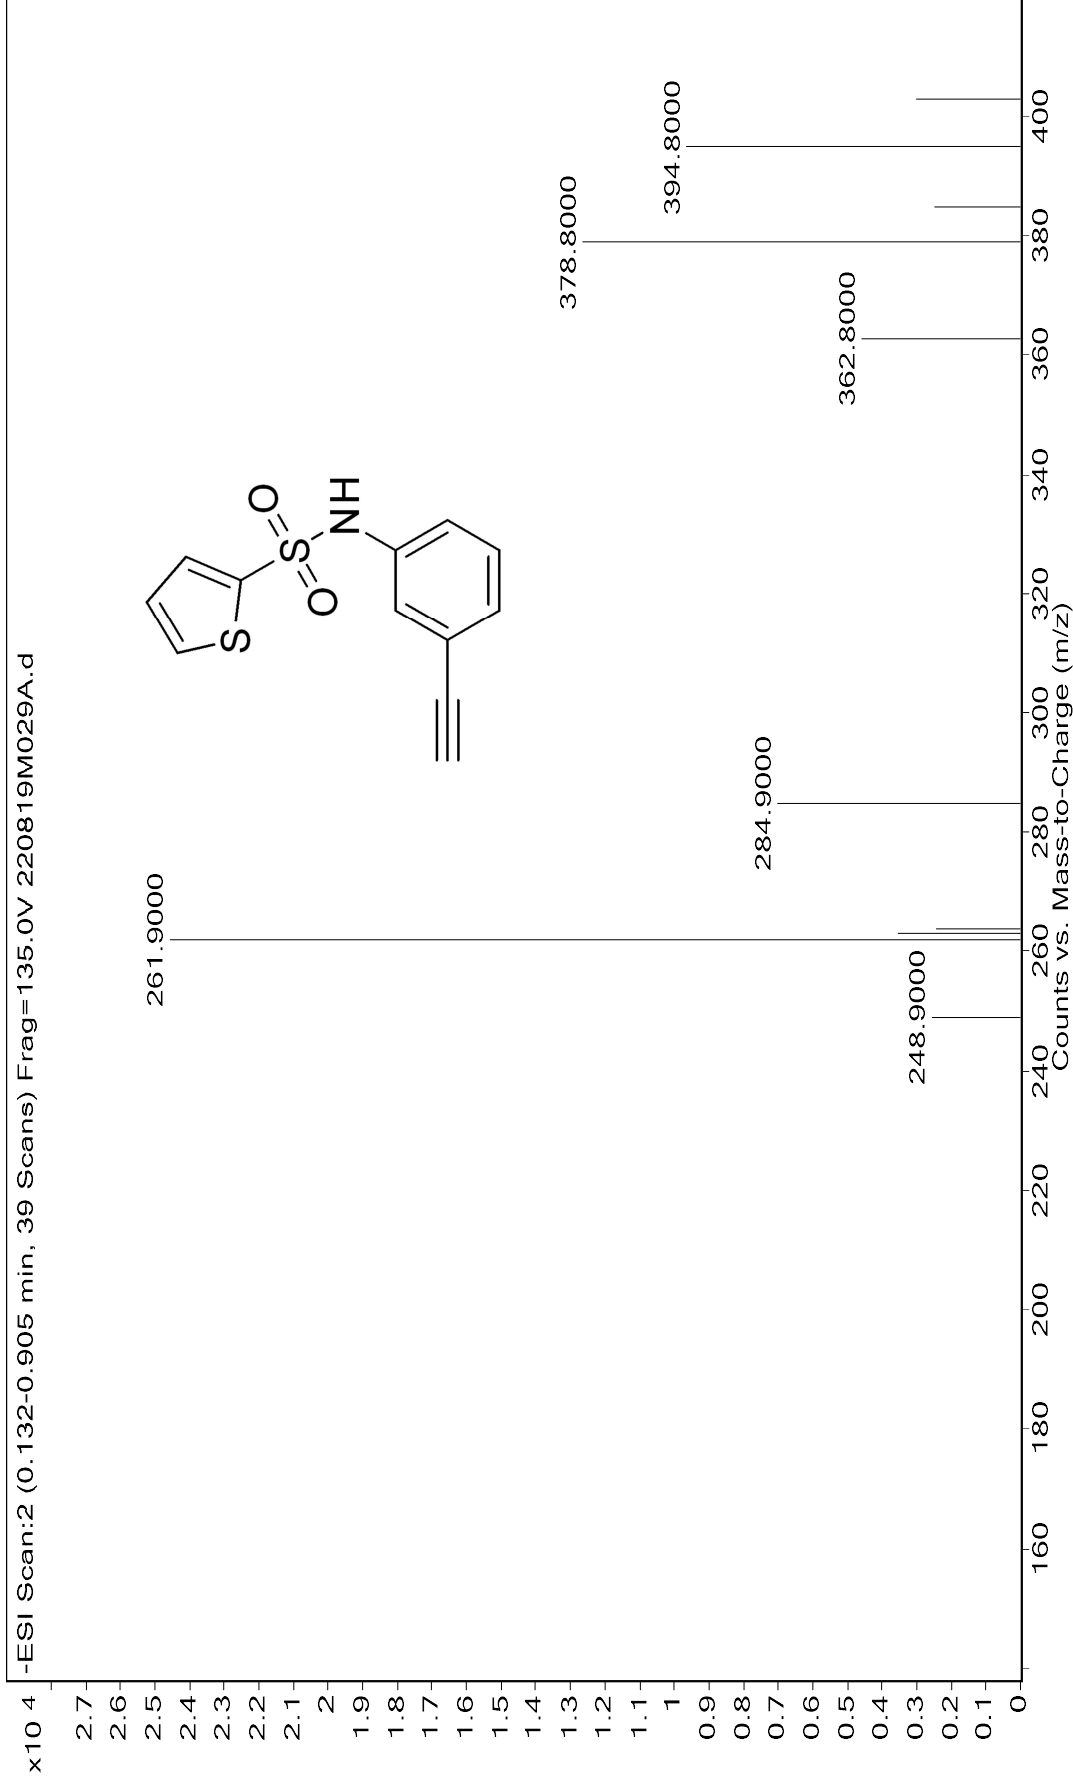

# Mass spectra of compound lah

Sample Name ILS/BTG/4-ETH-TPS      Vial 35      Instrument Name LCMS      User Name      Not Applicable  
Inj Vol 2      InjPosition      SampleType      IRM Calibration Status  
Data Filename 31102020M005.d      ACQ Method MMI-SM,m      Comment MA20J055      Acquired Time 10/31/2020 11:57:53 AM

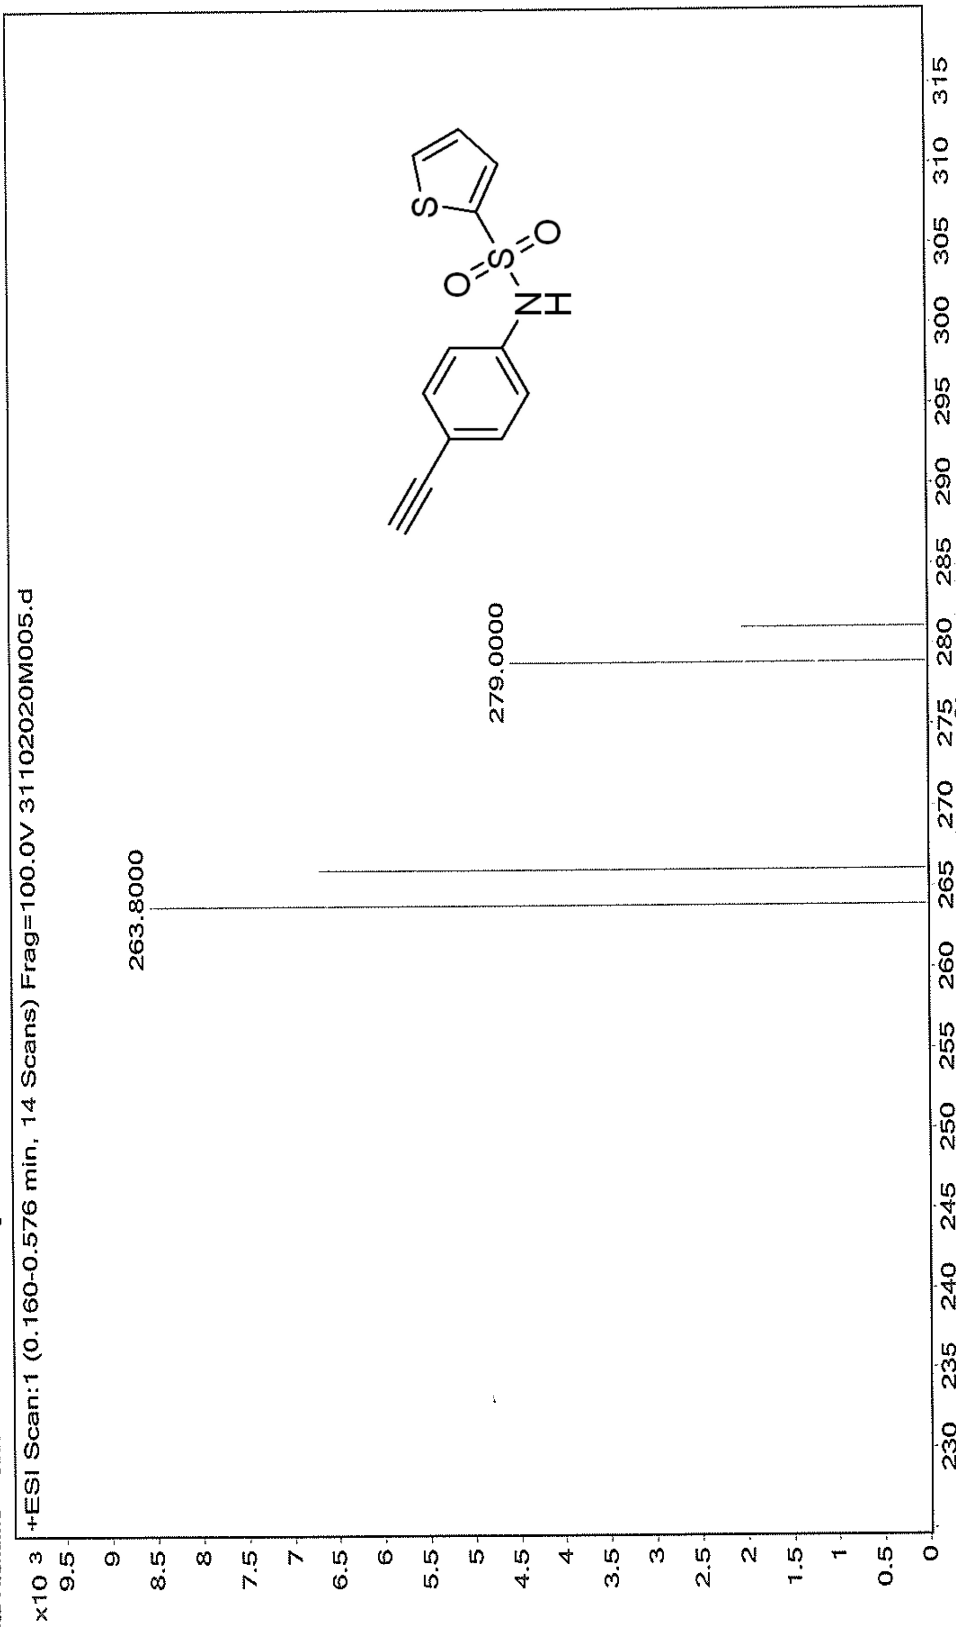

*Handwritten signature*  
3/10/2020

# Mass spectra of compound lai

**Sample Name** ILS-BTG3-ETH-MTS    **Position** Vial 75    **Instrument Name** LCMS    **User Name** Not Applicable  
**Inj Vol** 2    **InjPosition** MM1-SM,m    **SampleType** Sample    **IRM Calibration Status** 10/22/2020 4:22:35 PM  
**Data Filename** 21102020M027.d    **ACQ Method** MM1-SM,m    **Comment** MM20J041    **Acquired Time**

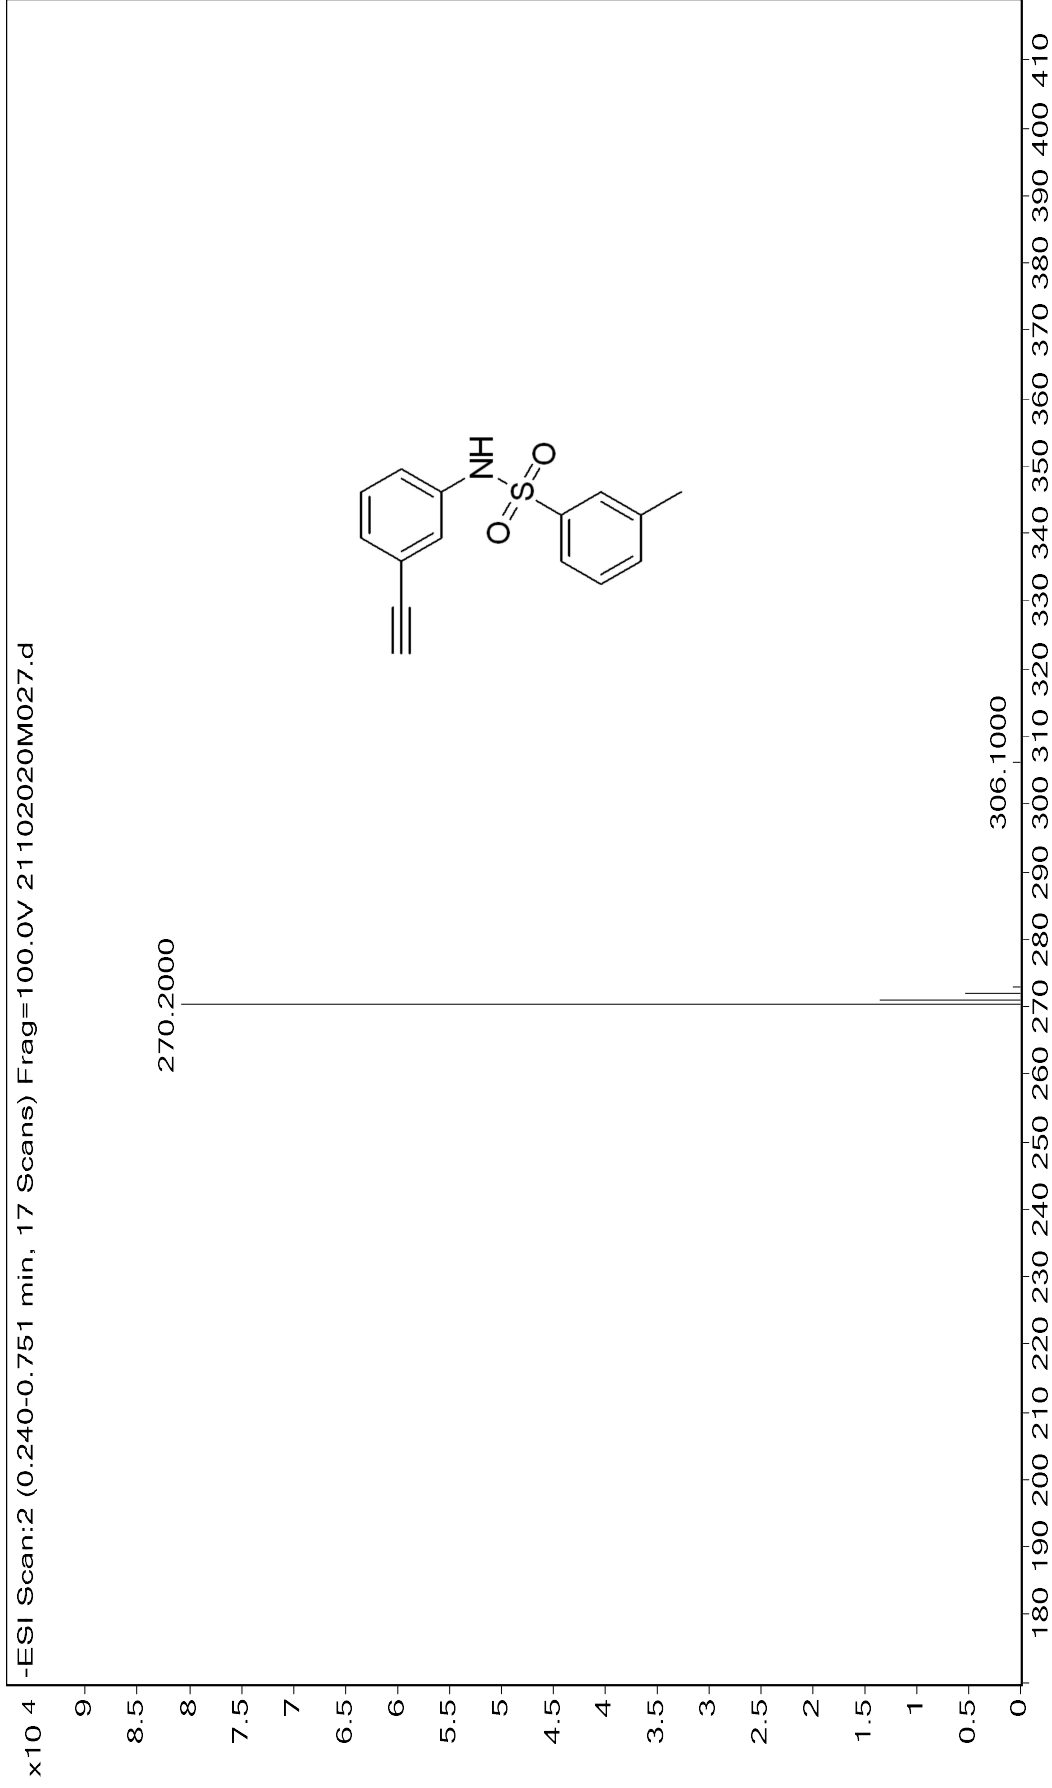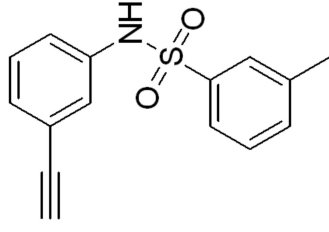

# Mass spectra of compound 2a

**Sample Name** ILS-BTG-PA-NM-CP    **Position** Vial 15    **Instrument Name** LCMS    **User Name**  
**Inj Vol** 3    **InjPosition**    **SampleType** Sample    **IRM Calibration Status** Not Applicable  
**Data Filename** 110320M008.d    **ACQ Method** MMI-SM,m    **Comment** MM20C028    **Acquired Time** 3/11/2020 11:22:52 AM

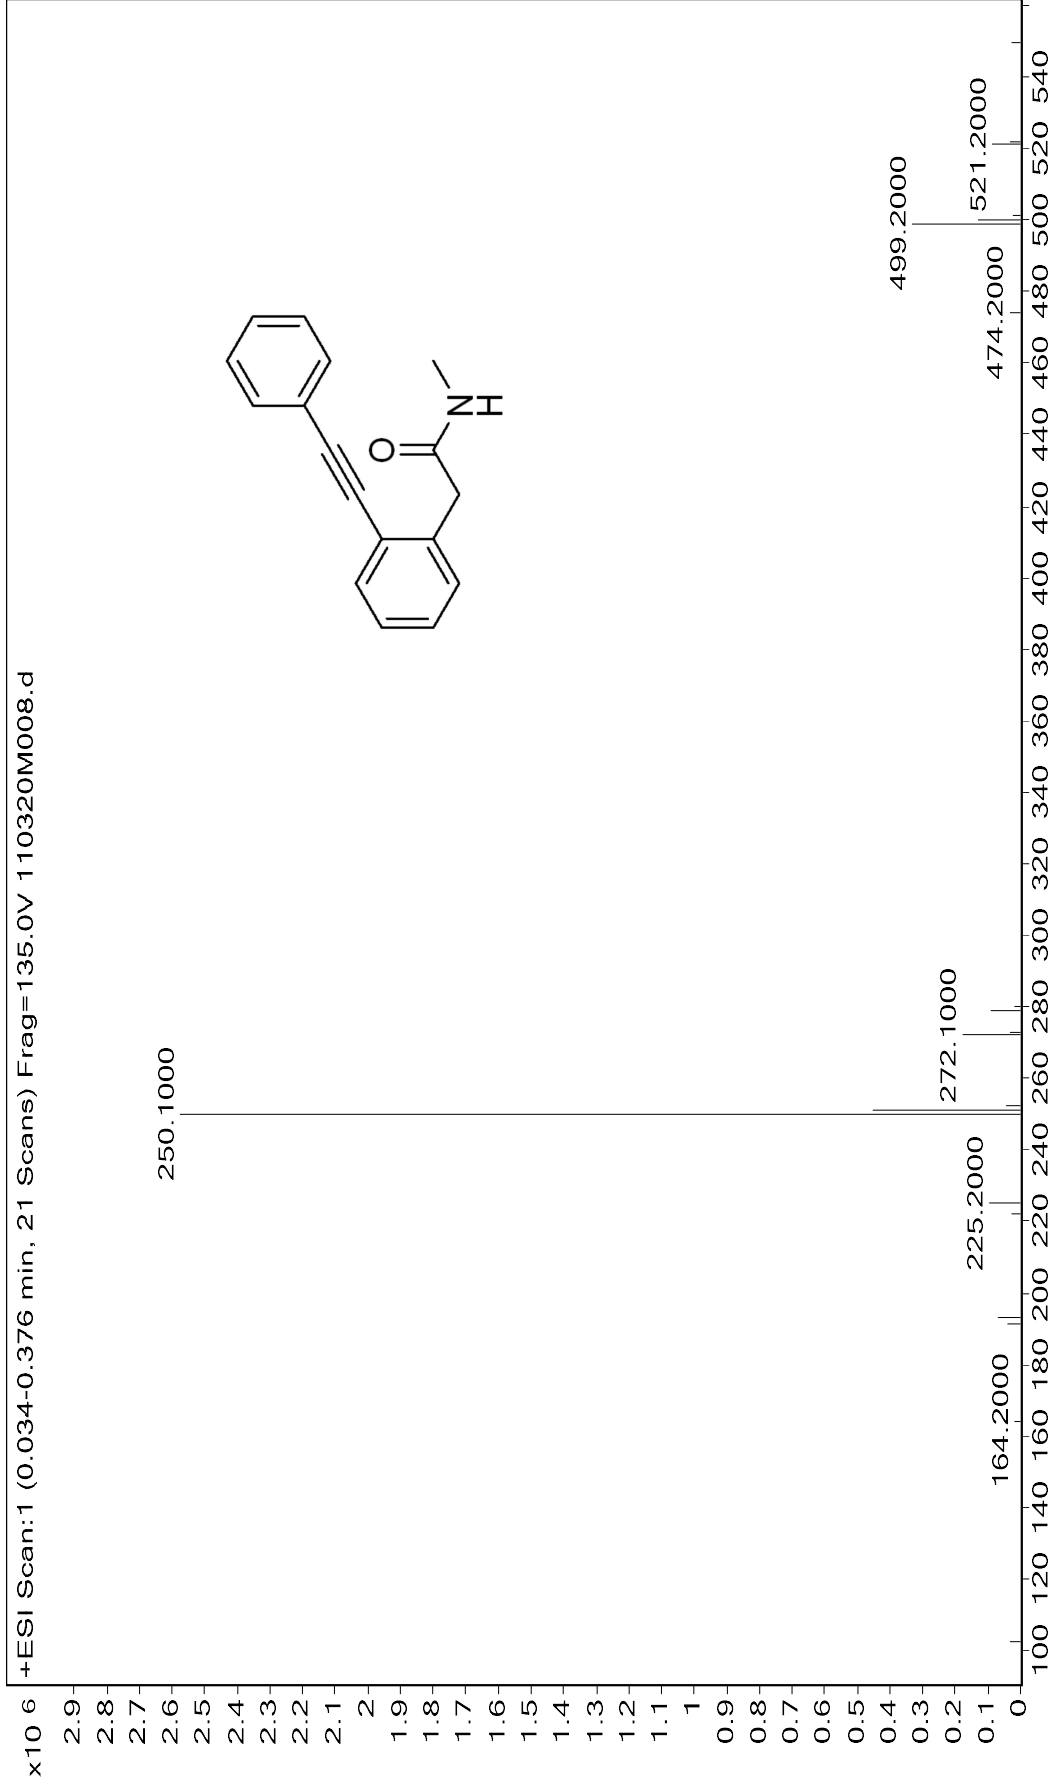

# Mass spectra of compound 2aa

**Sample Name** ILS-BTG-Eth-PA-CP    **Position** Vial 10    **Instrument Name** LCMS    **User Name**  
**Inj Vol** 2    **InjPosition**    **SampleType** Sample    **IRM Calibration Status** Not Applicable  
**Data Filename** 22072021M009.d    **ACQ Method** MMI-SMI.m    **Comment** MM21G037    **Acquired Time** 7/22/2021 1:31:29 PM

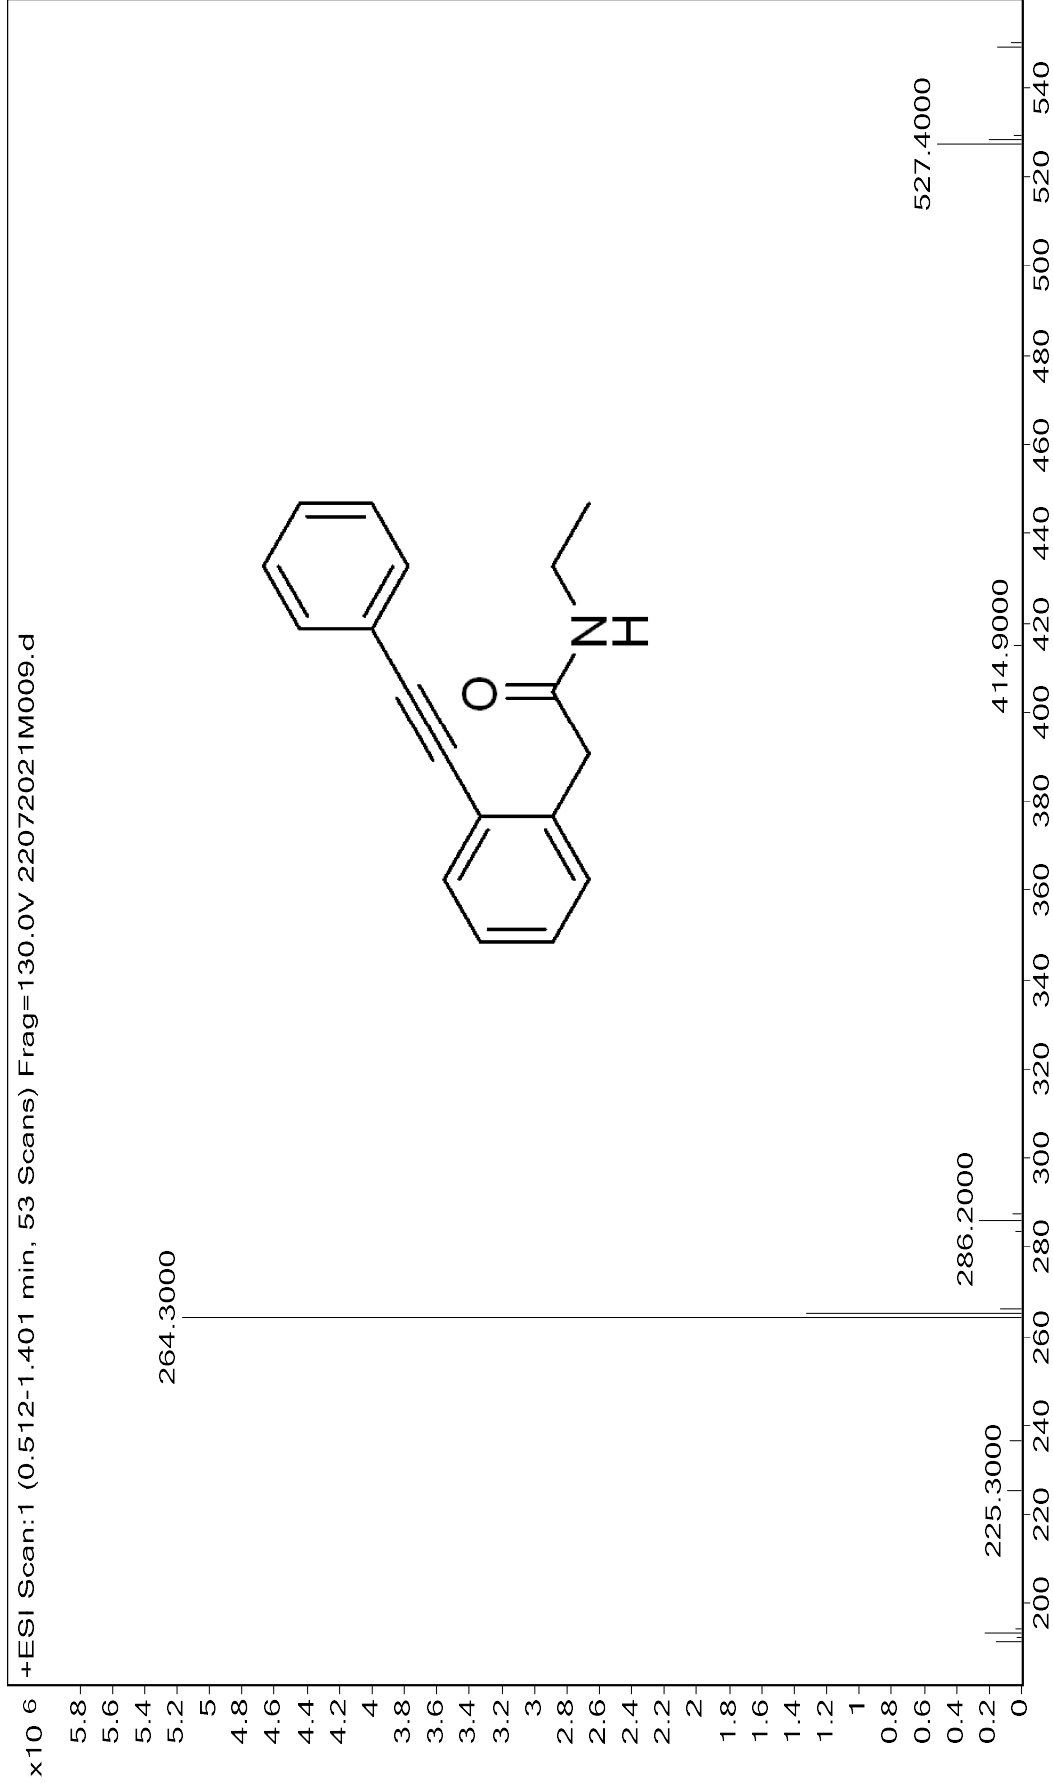

# Mass spectra of compound 2b

|                      |                   |                    |          |                        |          |                               |                      |
|----------------------|-------------------|--------------------|----------|------------------------|----------|-------------------------------|----------------------|
| <b>Sample Name</b>   | ILS/BTG/IPA/NM/CP | <b>Position</b>    | Vial 69  | <b>Instrument Name</b> | LCMS     | <b>User Name</b>              |                      |
| <b>Inj Vol</b>       | 1                 | <b>InjPosition</b> |          | <b>SampleType</b>      | Sample   | <b>IRM Calibration Status</b> | Not Applicable       |
| <b>Data Filename</b> | 160320M011.d      | <b>ACQ Method</b>  | MMI-SM,m | <b>Comment</b>         | MM20C040 | <b>Acquired Time</b>          | 3/16/2020 3:25:21 PM |

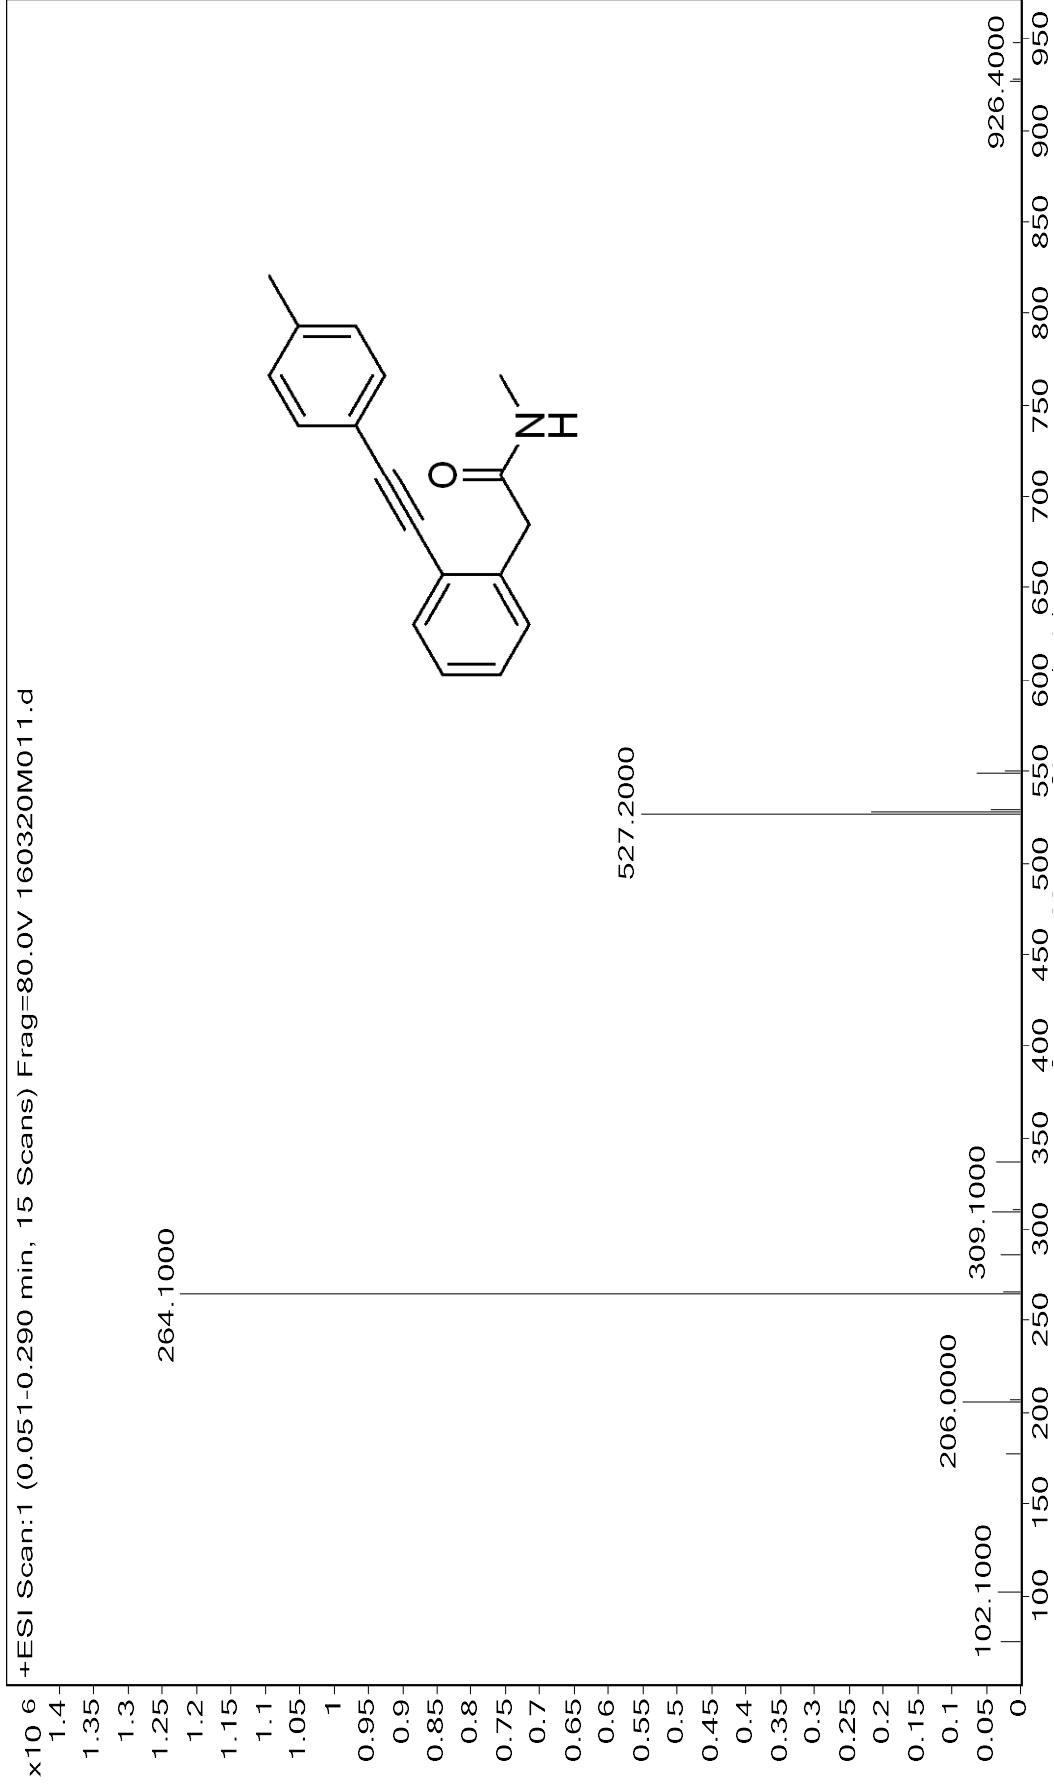

# Mass spectra of compound 2c

Sample Name ILS-BTG-MPA-NM-4 Position Vial 32 Instrument Name LCMS User Name  
Inj Vol 3 InjPosition ACQ Method MMI-SM.m Comment MM20C030 Sample MM20C030 IRM Calibration Status Not Applicable  
Data Filename 110320M021.d ACQ Method MMI-SM.m Comment MM20C030 Sample MM20C030 IRM Calibration Status Not Applicable  
Acquired Time 3/11/2020 6:01:03 PM

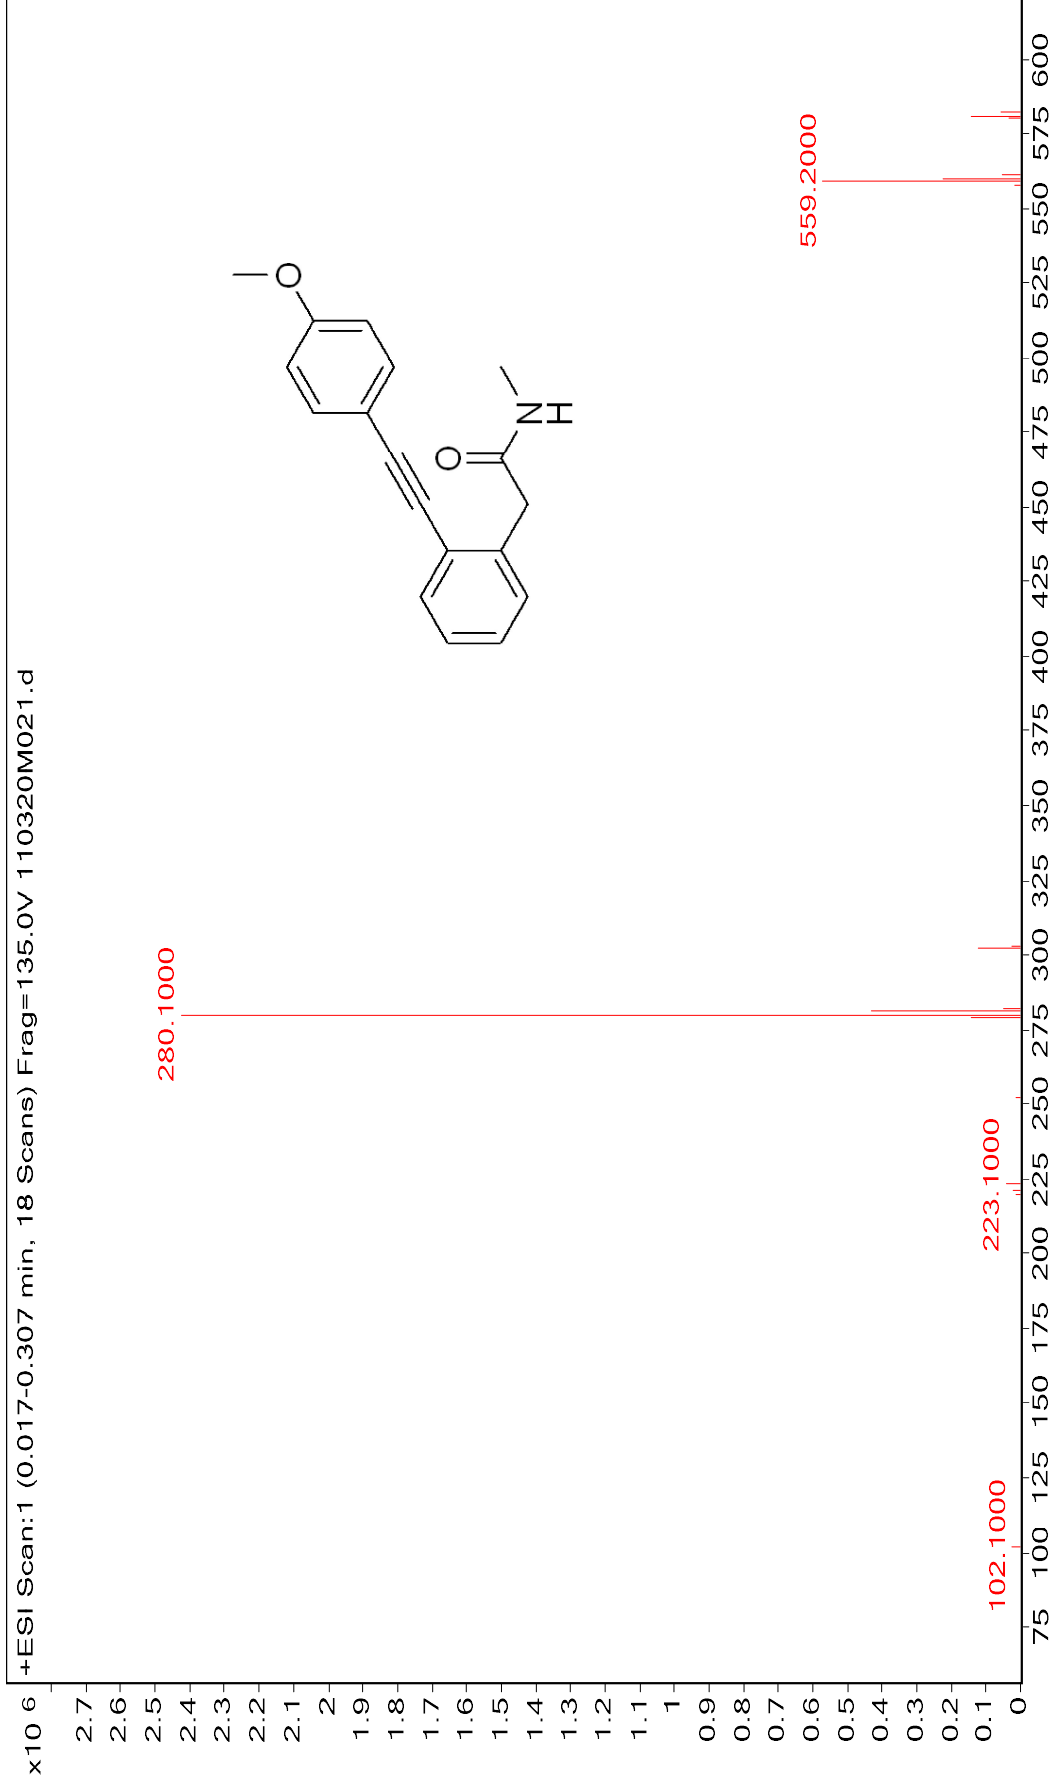



# Mass spectra of compound 2d

Sample Name ILS/BTG/FPA/NM/CP      Vial 47      Instrument Name LCMS      User Name  
Inj Vol 2      Inj Position      Sample Type      IRM Calibration Status  
Data Filename 14092020M007.d      ACQ Method      Comment MM201021      Acquired Time 9/14/2020 12:39:12 PM  
Not Applicable

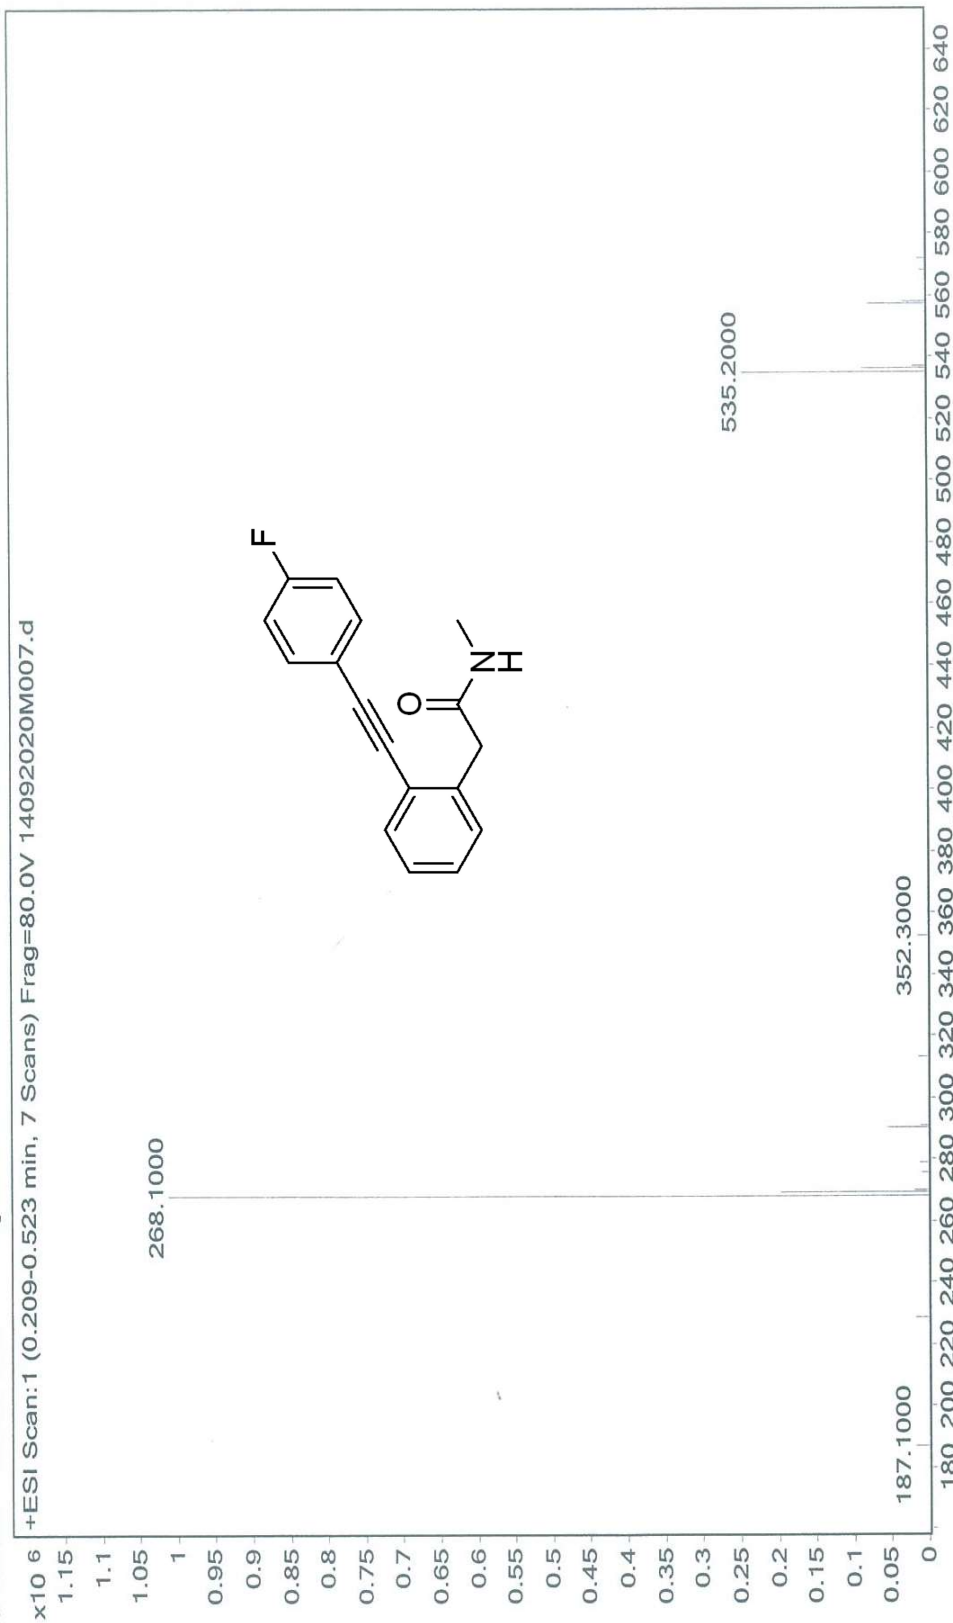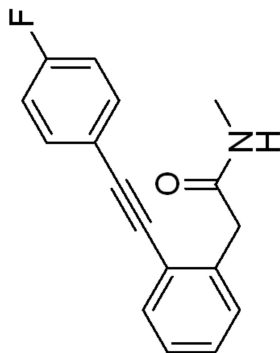

*Handwritten signature and date:*  
9/14/2020

# Mass spectra of compound 2e

Sample Name ILS/BTG/DIFPA/NM-CP      Position Vial 5      Instrument Name LCMS      User Name      Not Applicable  
Inj Vol 2      InjPosition      SampleType      IRM Calibration Status  
Data Filename 15092020M008.d      ACQ Method MMT-SM.m      Comment MM20I026      Acquired Time 9/15/2020 3:09:06 PM

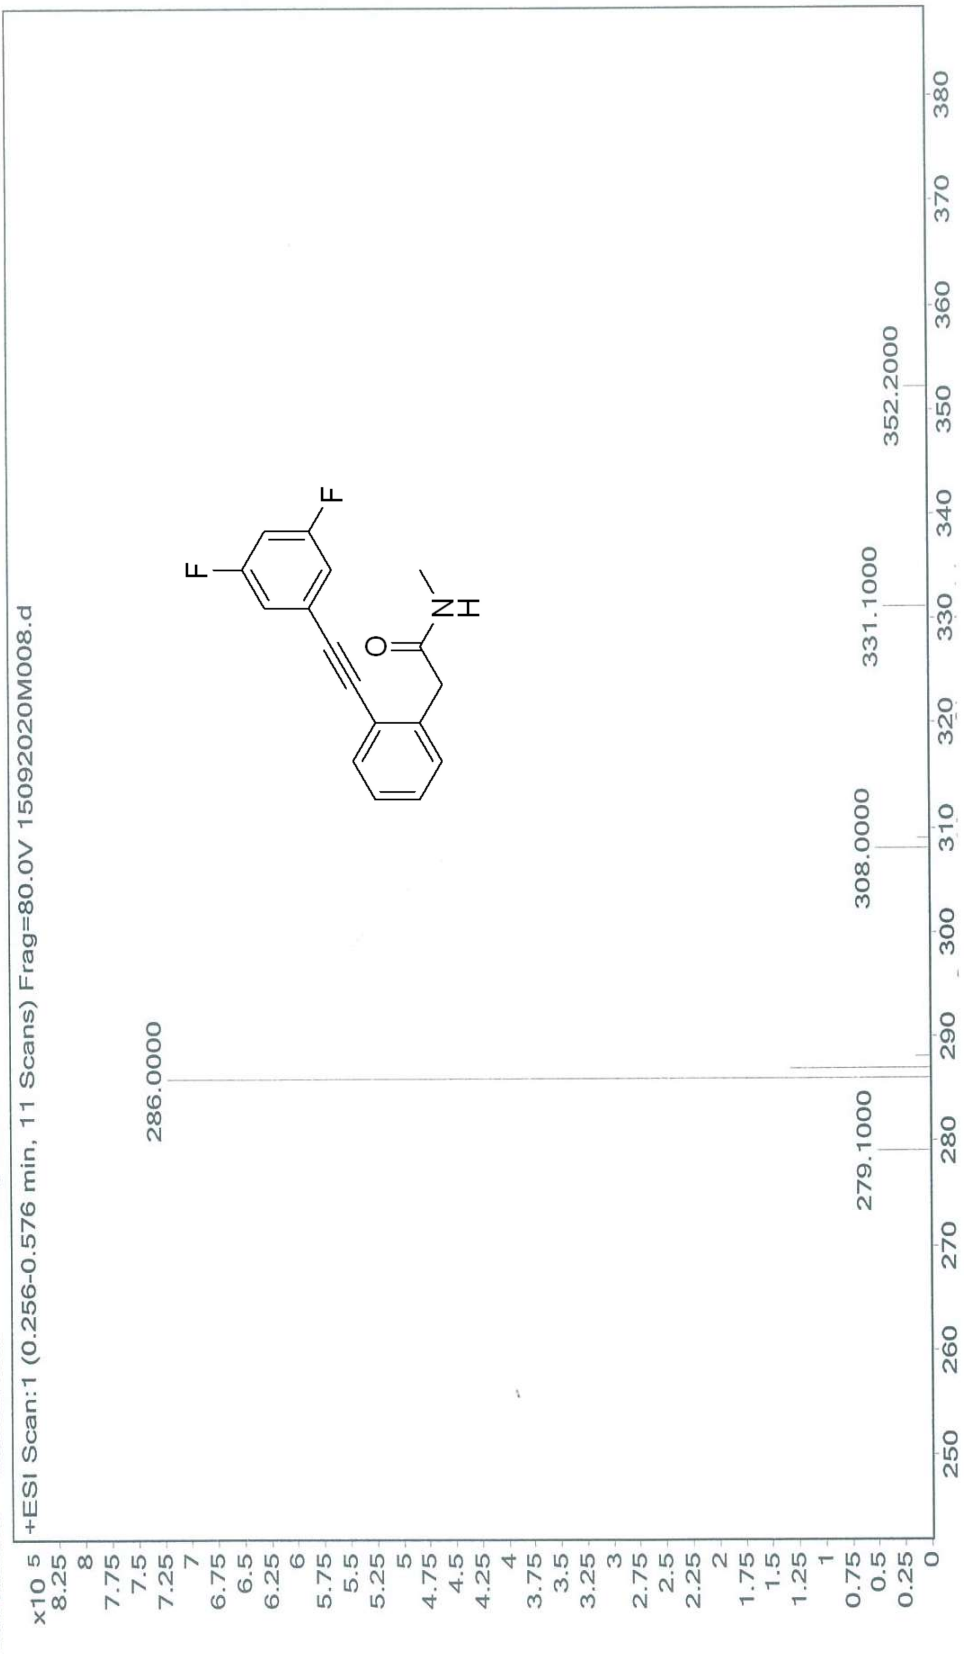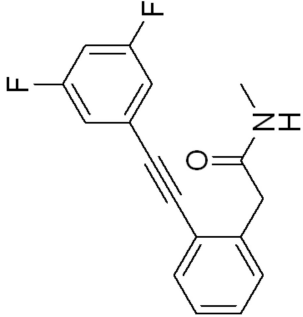

*Handwritten signature and date:*  
15/09/2020

# Mass spectra of compound 2f

**Sample Name** ILS/BTG/MSPA/NM/CP **Position** Vial 36 **Instrument Name** LCMS **User Name**  
**Inj Vol** 1 **InjPosition** **SampleType** Sample **IRM Calibration Status** Not Applicable  
**Data Filename** 190320M006.d **ACQ Method** MMI-SM.m **Comment** MM20C055 **Acquired Time** 3/19/2020 4:49:37 PM

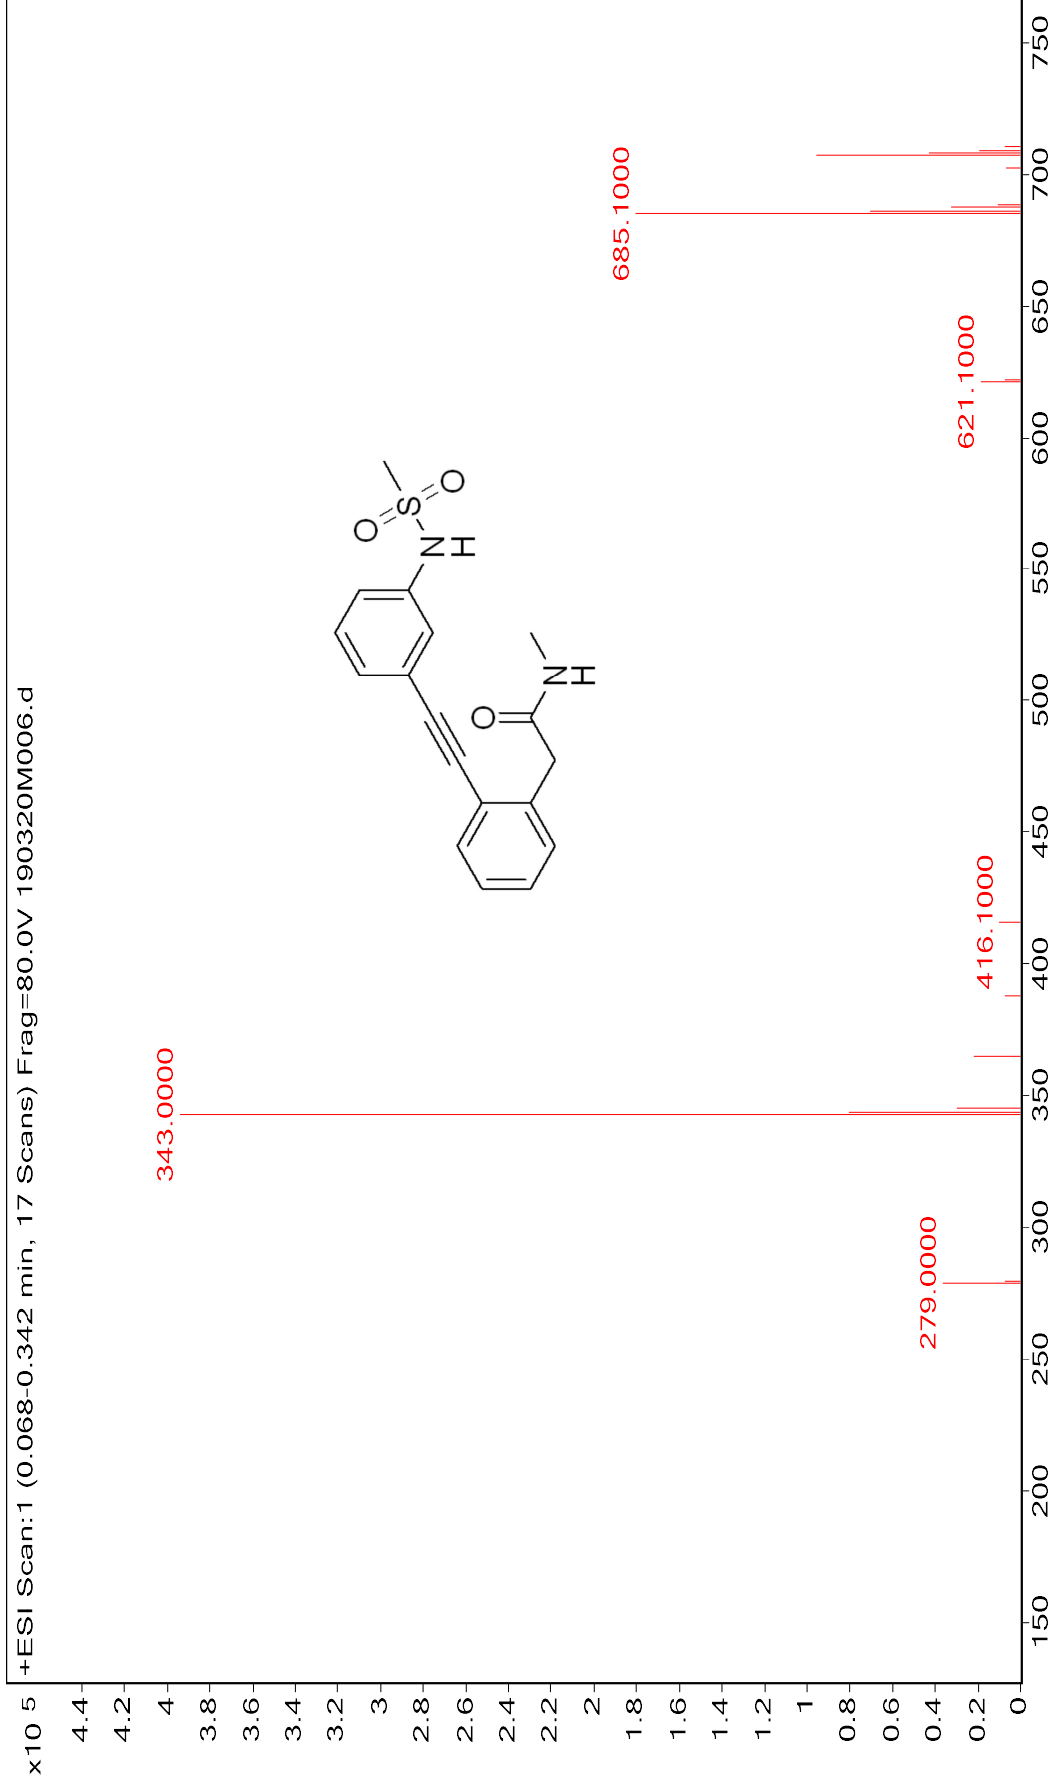

# Mass spectra of compound 2g

Sample Name ILS/BTG./4MSPA/NM/CP      Inj Vol 2      Data Filename 27102020M018.d      Instrument Name Vial 30      Sample Type MM20J046      User Name      IRM Calibration Status Not Applicable      Acquired Time 10/27/2020 5:48:43 PM

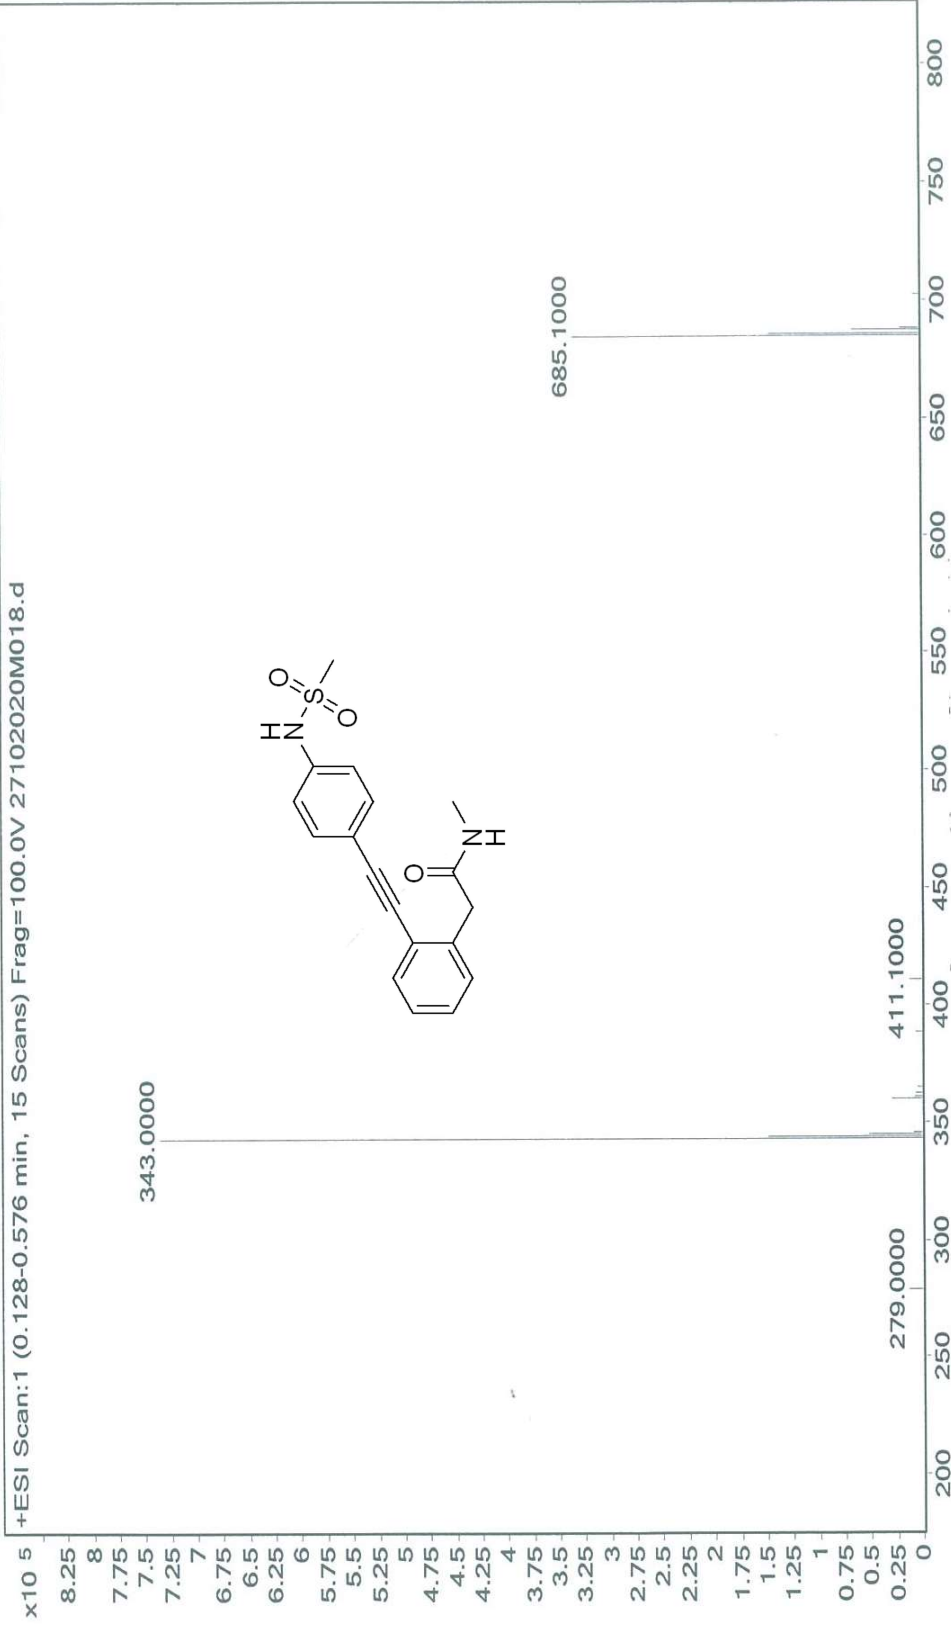

*Handwritten signature*  
Mikolaj

# Mass spectra of compound 2h

Sample Name ILS/BTG/BSPA/NM/CP Position 2 InjVol 2 InjPosition 2  
Data Filename 052102020M009.d ACQ Method MM1-SM.m Comment MM20J009  
Vial 38 Instrument Name LCMS Sample MM20J009  
User Name Not Applicable  
IRM Calibration Status 10/5/2020 12:24:03 PM  
Acquired Time

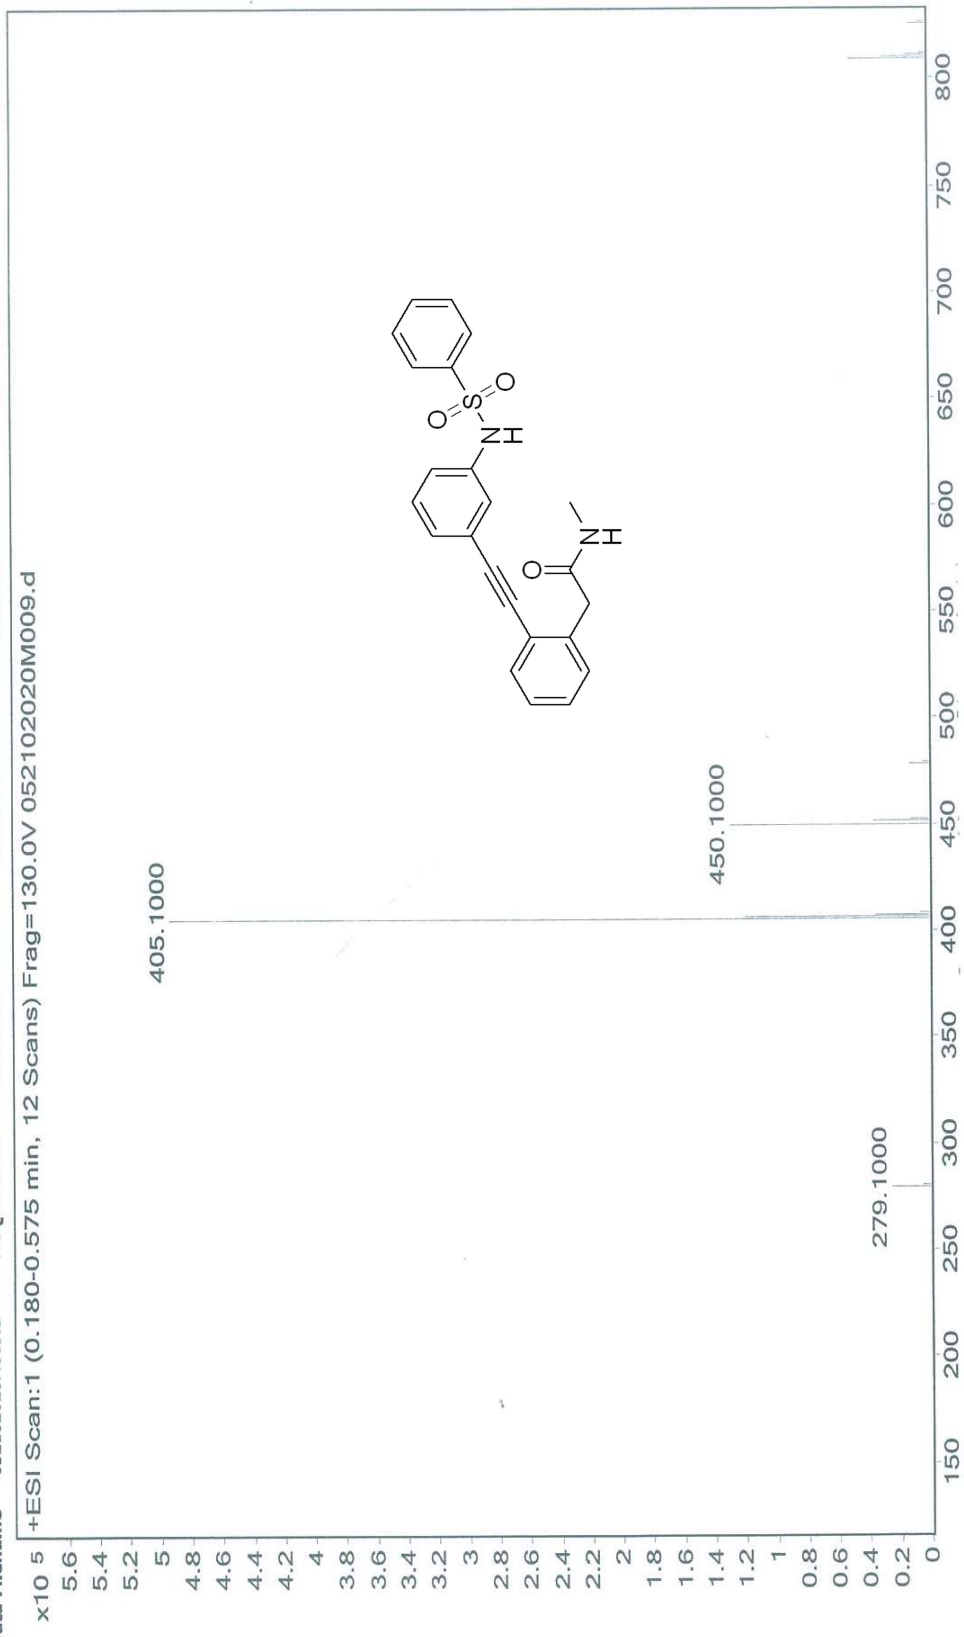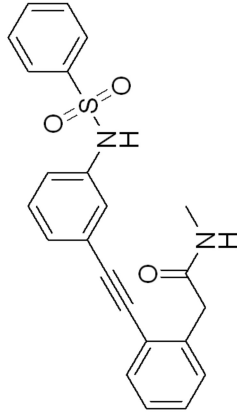

*Handwritten signature and date:*  
05/10/2020

# Mass spectra of compound 2i

Sample Name 1LS-BTG-4BSPA-NM-CP      Position Vial 9      Instrument Name LCMS      User Name  
Inj Vol 2      InjPosition      SampleType      IRM Calibration Status  
Data Filename 19102020M011.d      ACQ Method MMF-SM.m      Comment MM20J029      Acquired Time 10/16/2020 4:35:54 PM  
Not Applicable

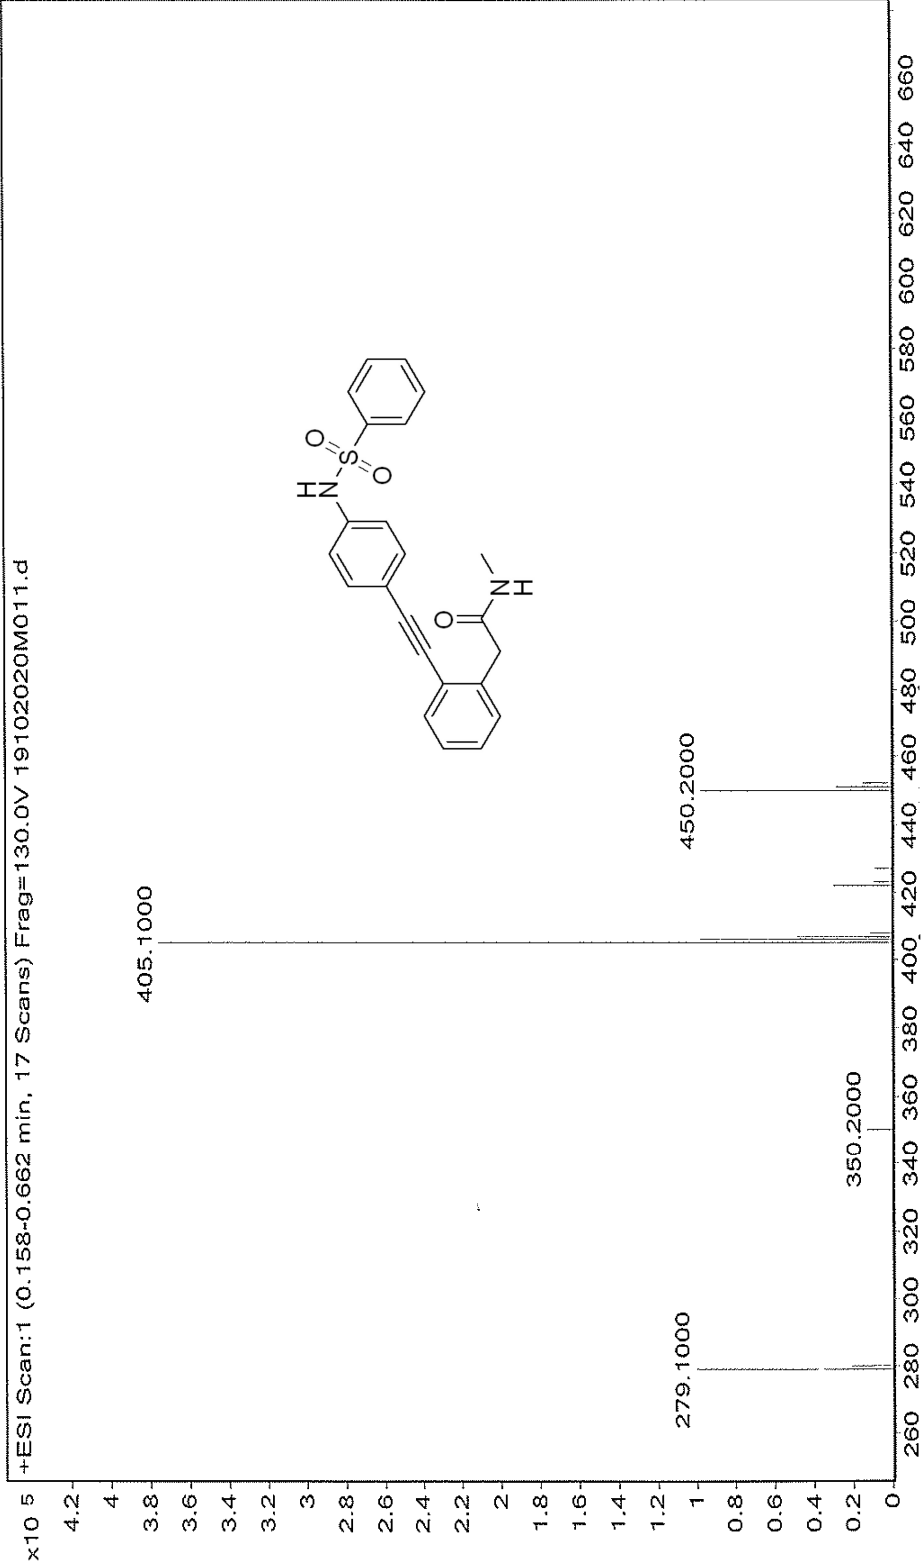

# Mass spectra of compound 2j

**Sample Name** ILS/BTG/TSPA/NM/CP **Position** Vial 39 **User Name**  
**Inj Vol** 2 **InjPosition** **Instrument Name** LCMS **IRM Calibration Status** Not Applicable  
**Data Filename** 30092020M010.d **ACQ Method** MMI-SM,m **Sample Comment** MM20I070 **Acquired Time** 9/30/2020 1:19:53 PM

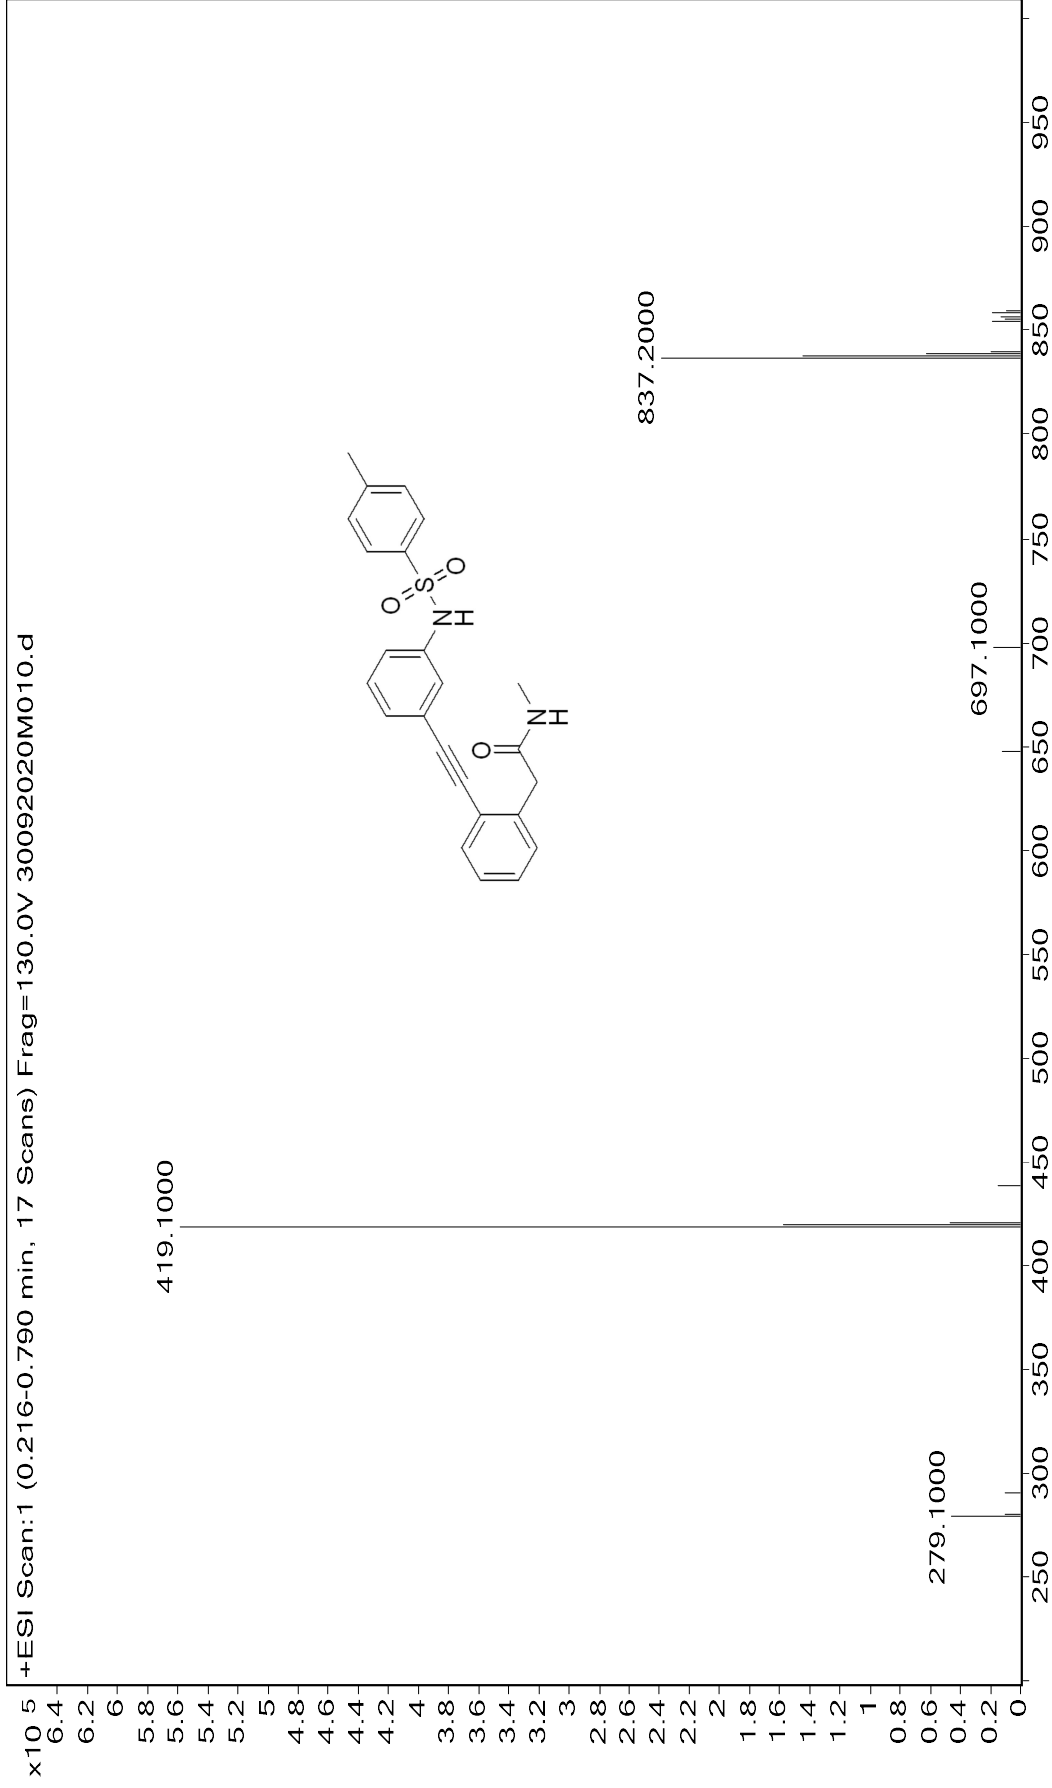

# Mass spectra of compound 2k

Sample Name: ILS/BTG/4TSPA/MM-CP  
Inj Vol: 2  
Data Filename: 13102020LM002.d  
Position: Vial 42  
Inj Position: MMI-SM.m  
ACQ Method: MMI-SM.m  
Instrument Name: LCMS  
Sample: MM203023  
Comment: 13102020LM002.d  
User Name: Not Applicable  
IRM Calibration Status: 10/13/2020 10:06:55 AM  
Acquired Time: 10:06:55 AM

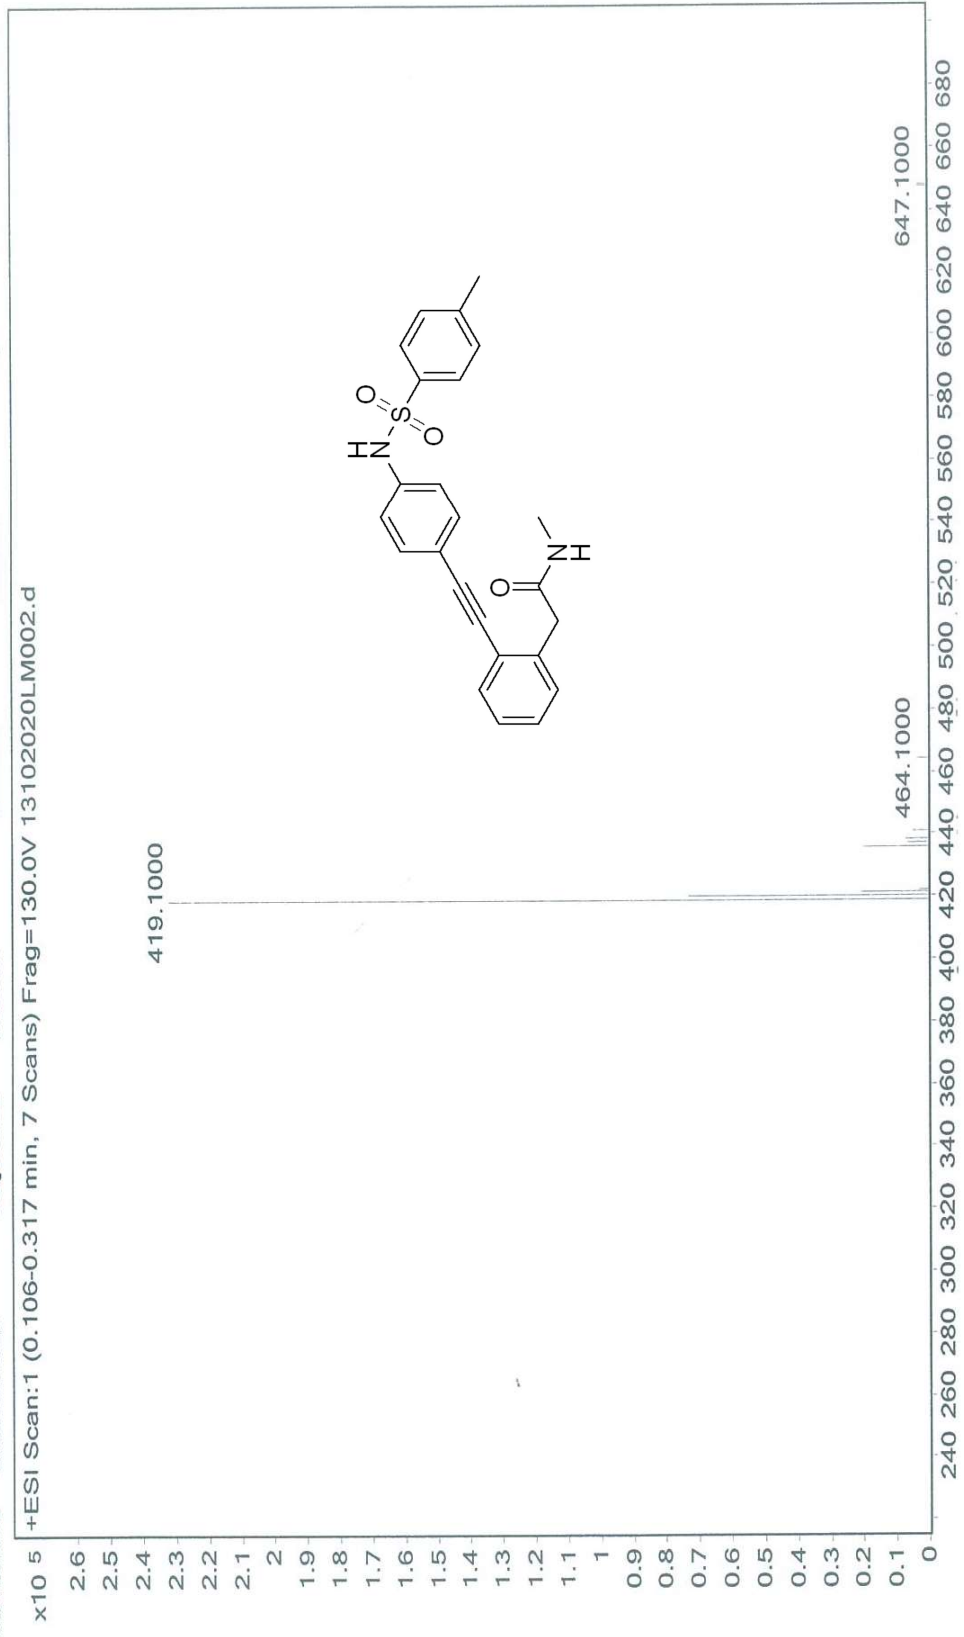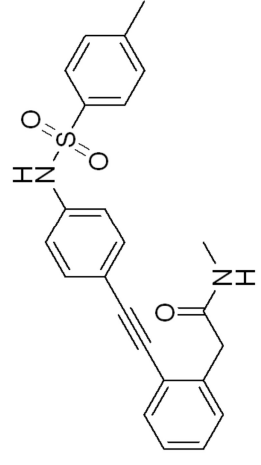

*Handwritten signature and date:*  
S. Helmer  
10/13/2020



# Mass spectra of compound 2l

Sample Name ILS/BTG/TPSPA/NM-CP      Instrument Name LCMS      User Name      Not Applicable  
Inj Vol 2      Vial 26      Sample      IRM Calibration Status  
Data Filename 032102020M006.d      Method MMI-SM,m      Comment MM20J005      Acquired Time 10/3/2020 12:21:27 PM

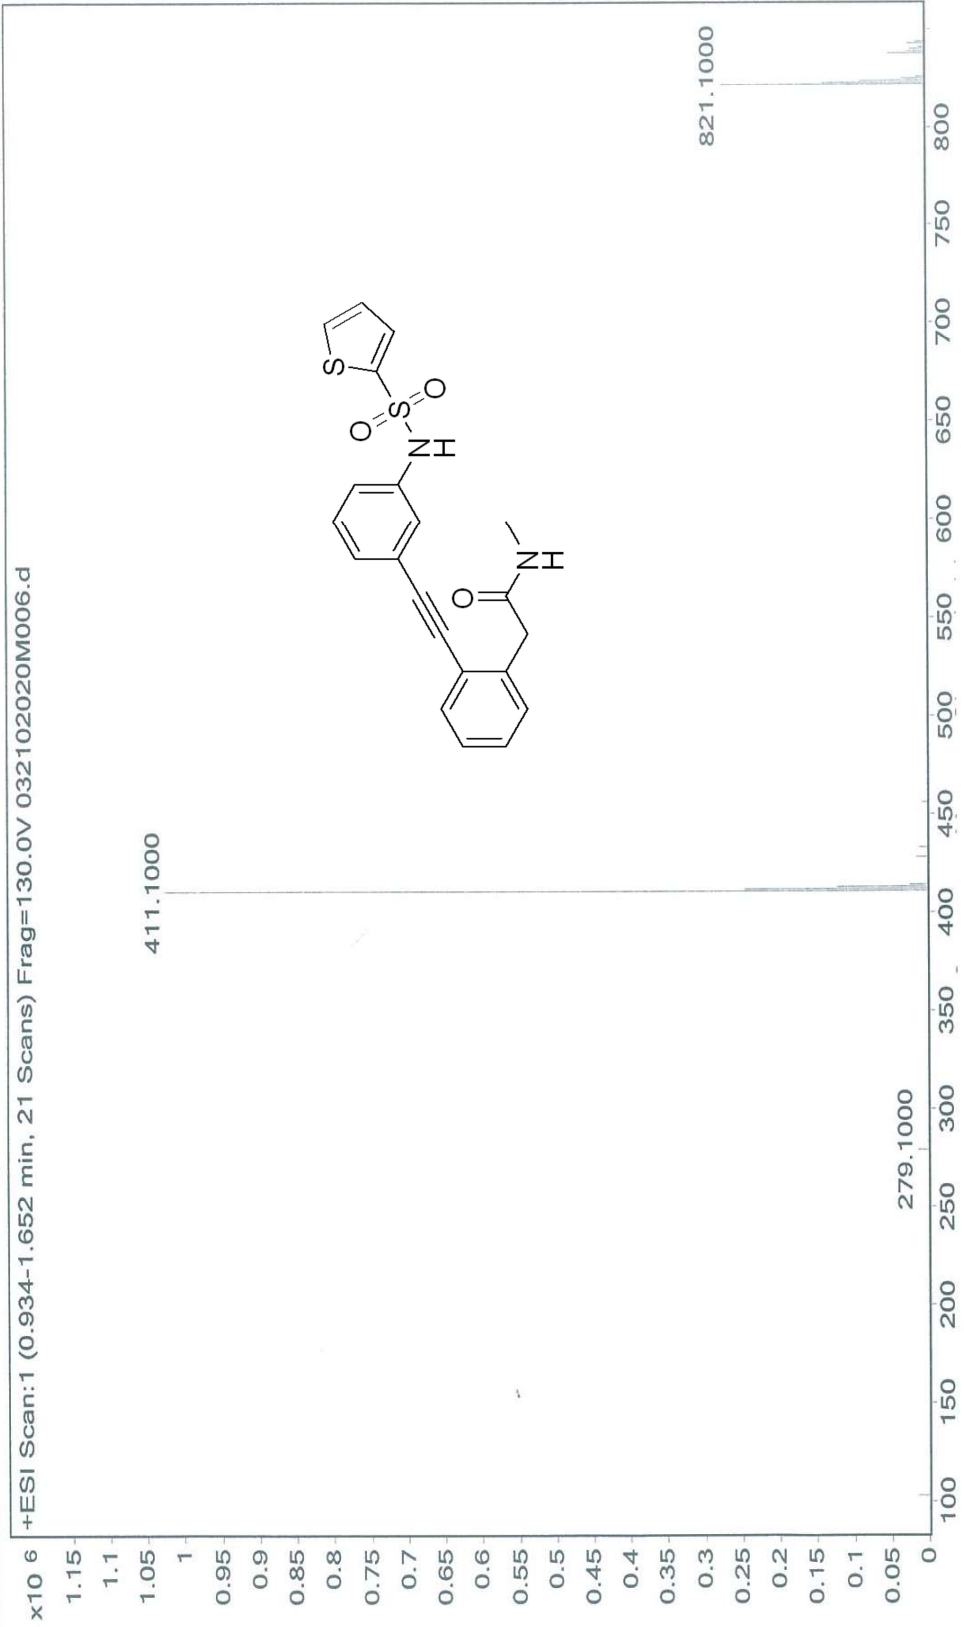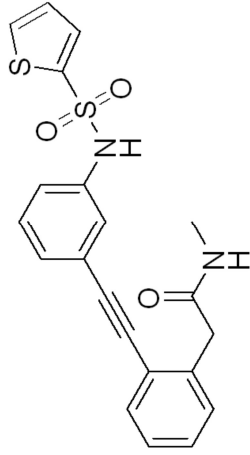

*Handwritten signature*  
03/10/2020

# Mass spectra of compound 2m

**Sample Name** ILS-BTG-4TPSPA-NM-CP    **Position** Vial 29    **User Name**    **IRM Calibration Status** Not Applicable  
**Inj Vol** 2    **InjPosition**    **Instrument Name** LCMS    **Sample**    **Acquired Time** 11/3/2020 2:03:29 PM  
**Data Filename** 03112020M009.d    **ACQ Method** MMI-SM.m    **SampleType** Sample    **Comment** MM20K007

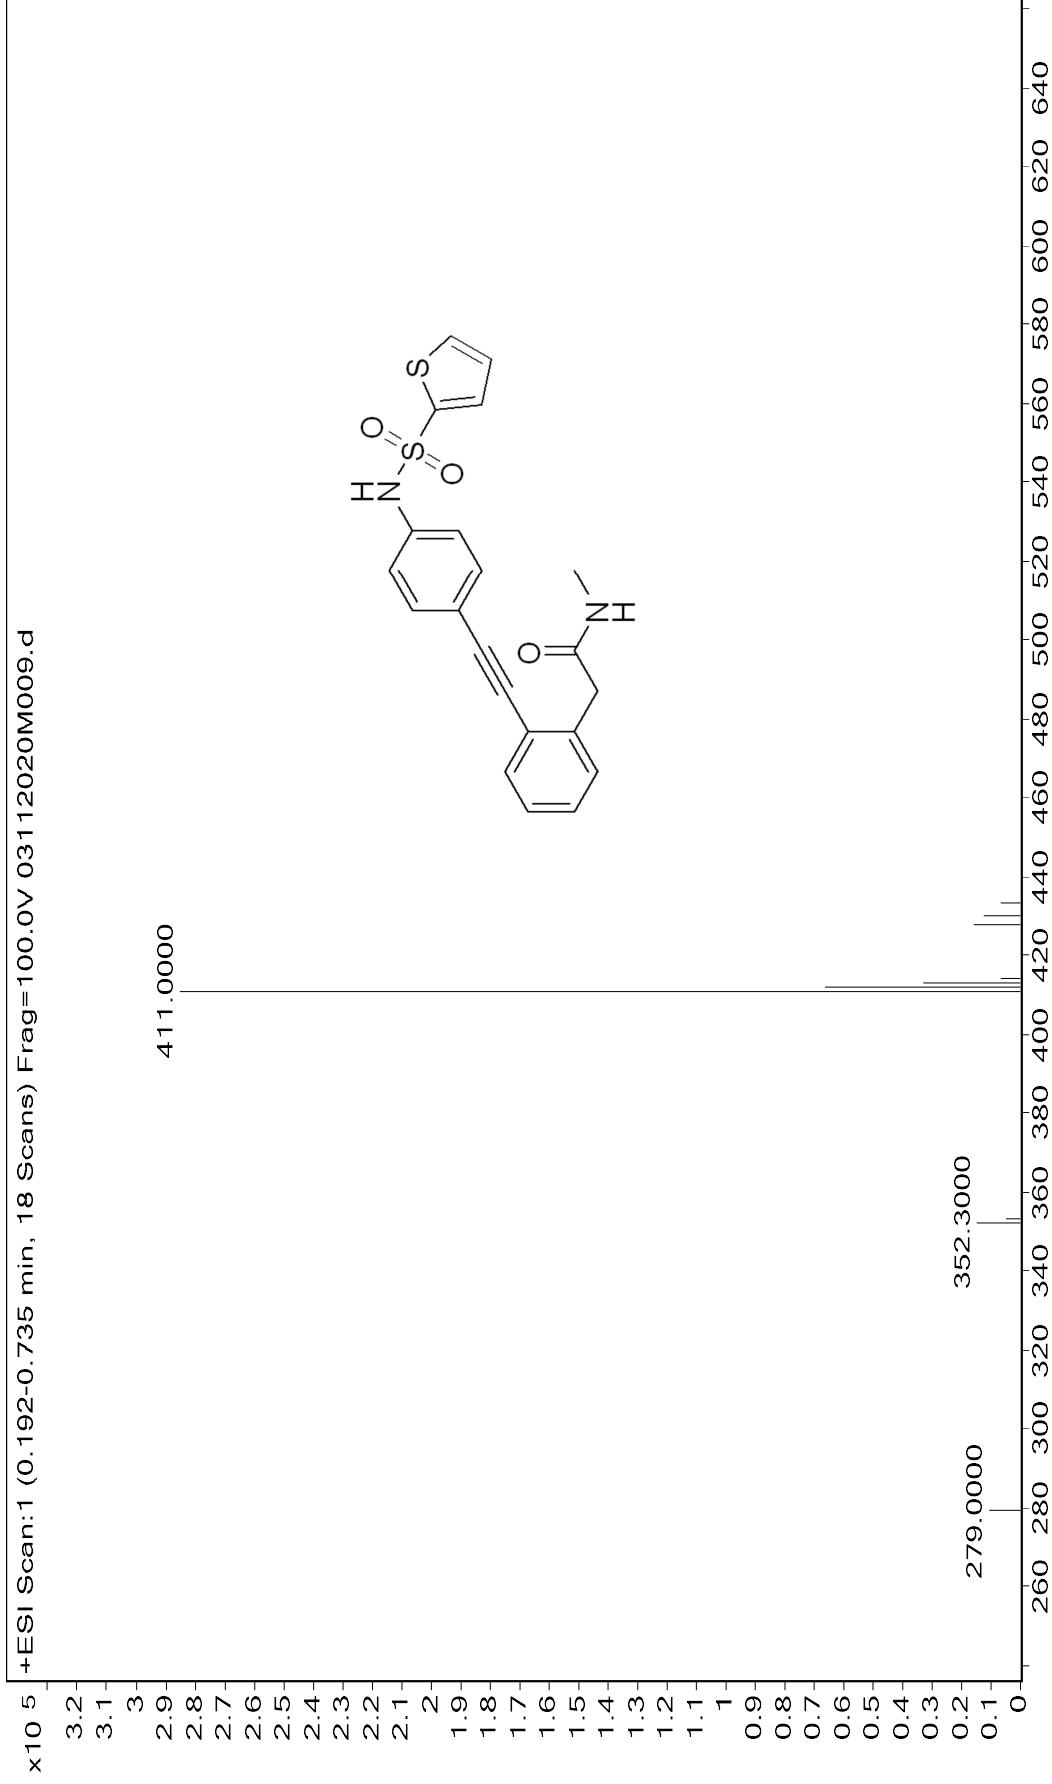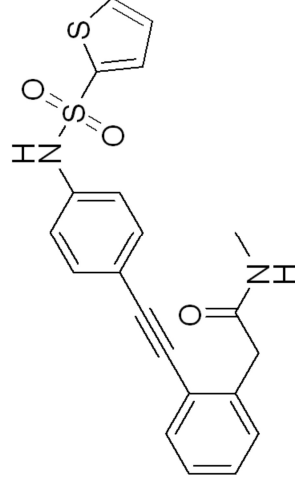

# Mass spectra of compound 2n

Sample Name ILS/BTG/MTSPA-NM/CP Position InjPosition ACQ Method  
Inj Vol 2 InjPosition ACQ Method  
Data Filename 04112020M023.d  
Vial 18  
MMI-SM.m  
Instrument Name Sample Comment  
MM20K010  
User Name  
IRM Calibration Status  
Acquired Time  
Not Applicable  
11/4/2020 4:59:31 PM

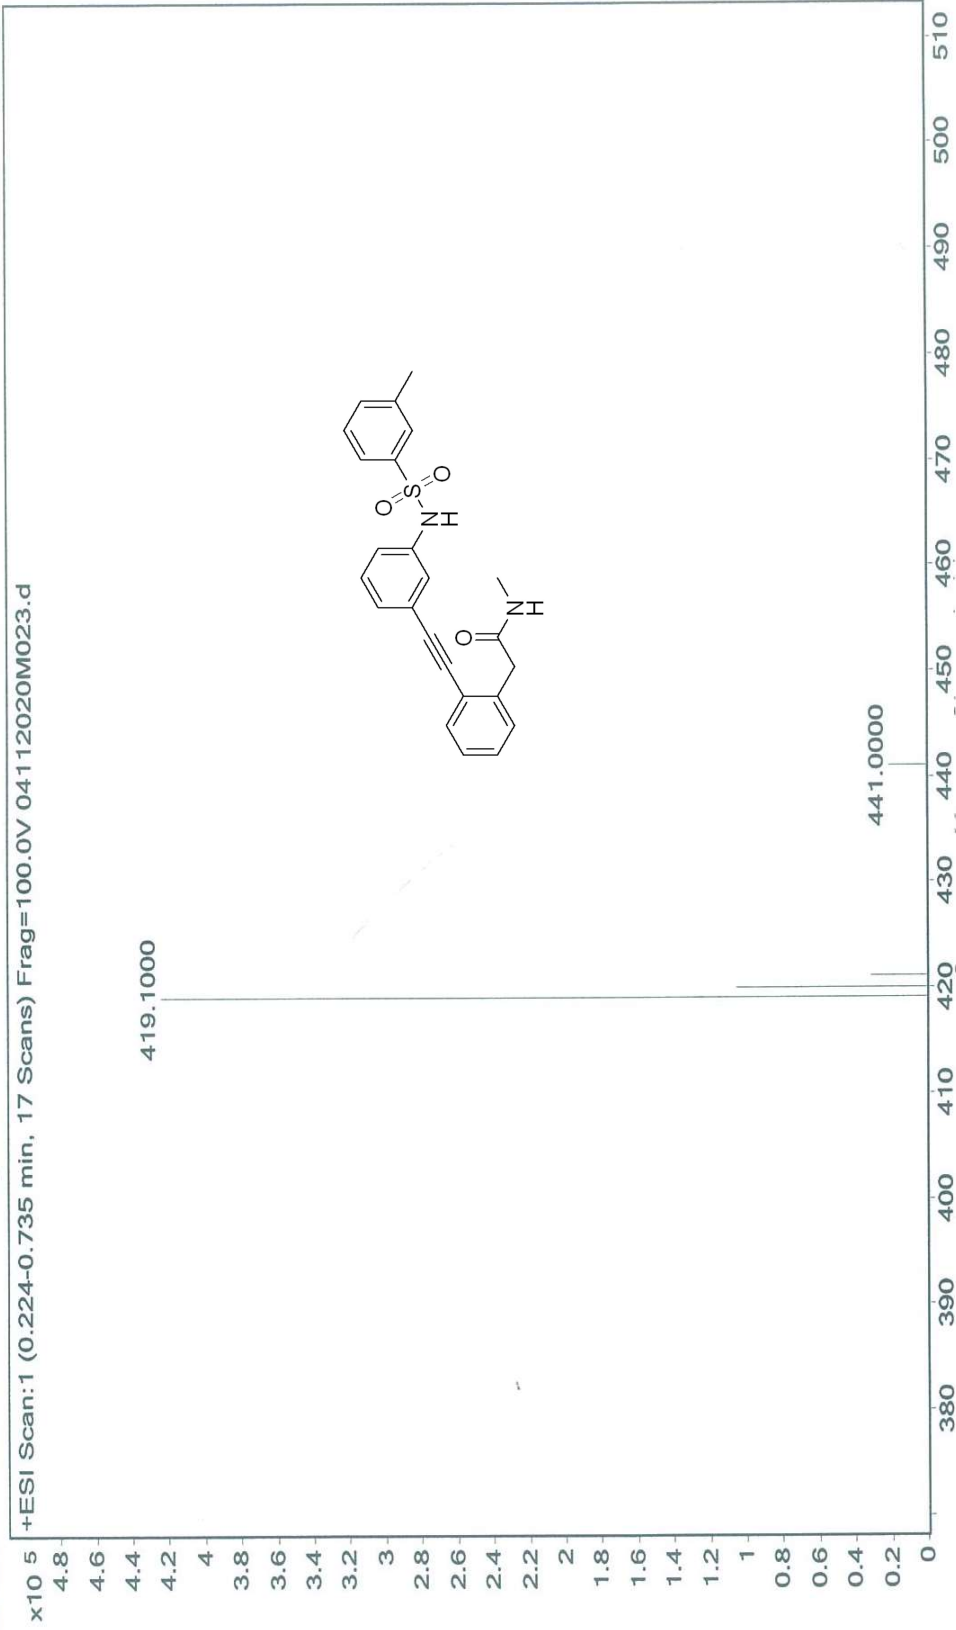

*Handwritten signature and date:*  
04/11/2020

# Mass spectra of compound 3a

**Sample Name** ILS-BTG-PA-NM-MVK **Position** Vial 27 **User Name**  
**Inj Vol** 2 **InjPosition** **Instrument Name** LCMS **Sample** **IRM Calibration Status** Not Applicable  
**Data Filename** 25092020M024.d **ACQ Method** MMI-SM,m **Comment** MM20I063 **Acquired Time** 9/25/2020 5:04:44 PM

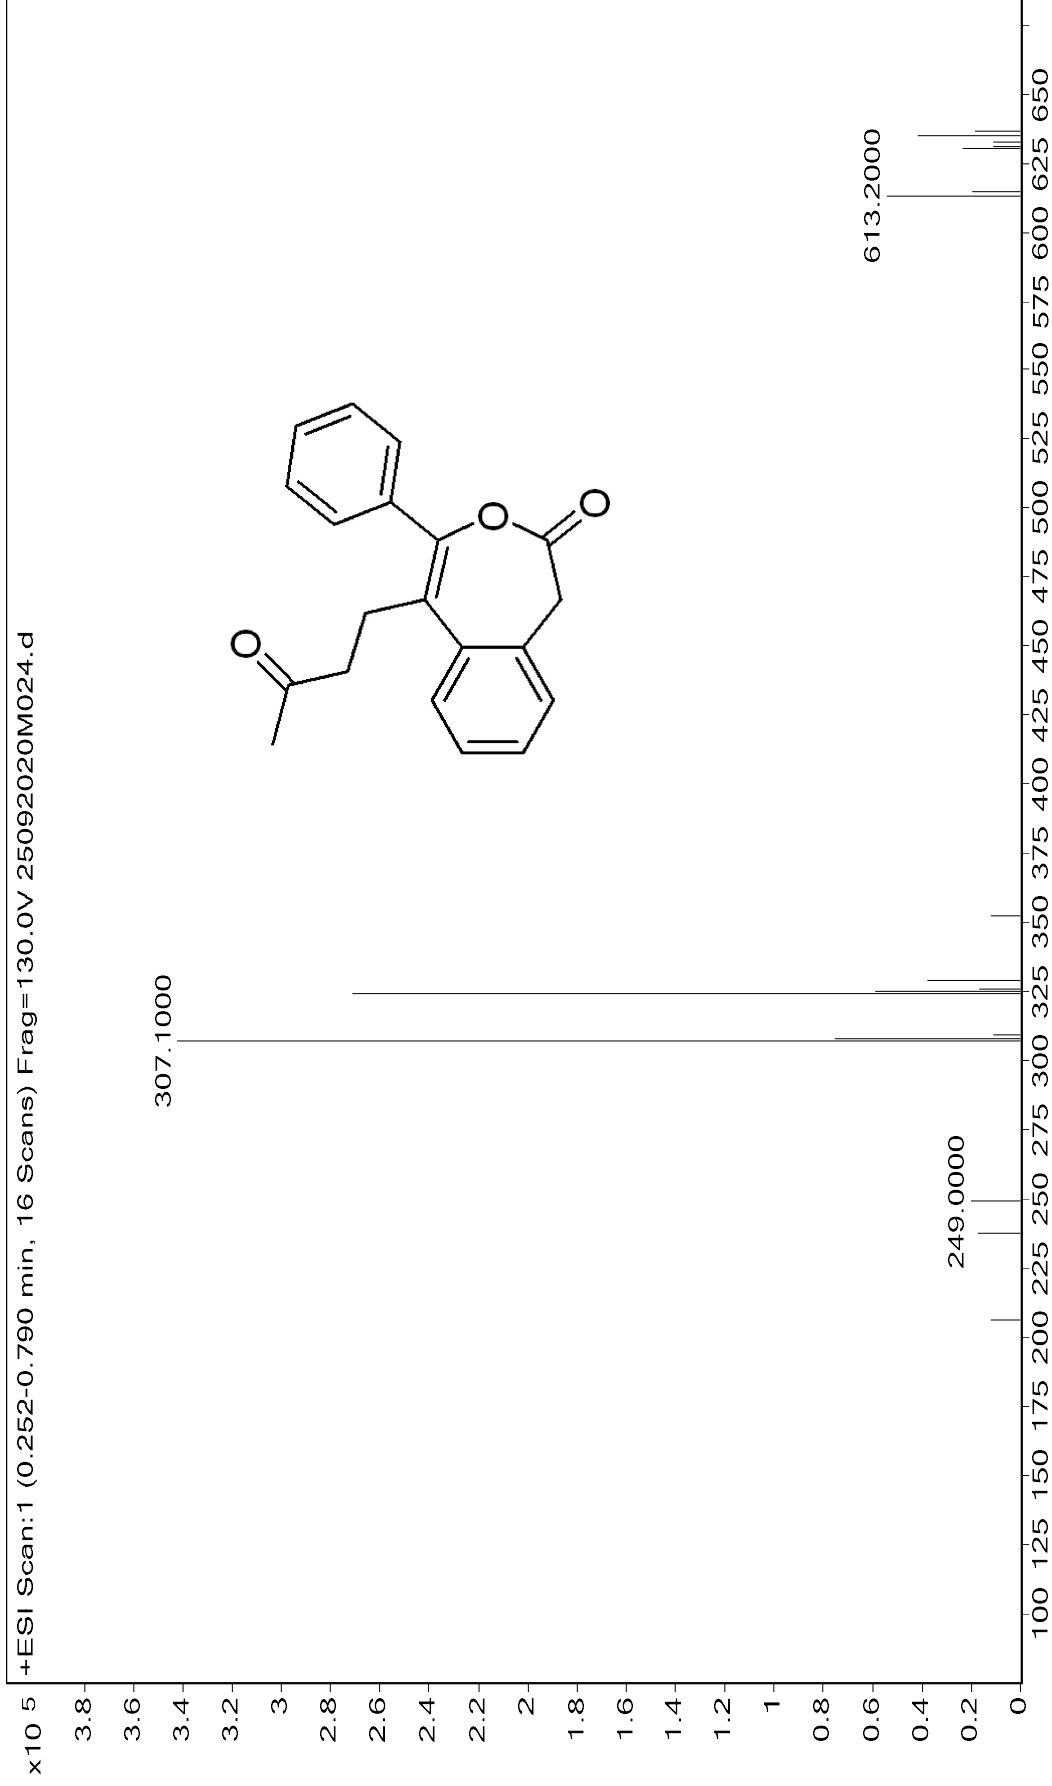

# Mass spectra of compound 3b

Sample Name ILS-BTG-TPA-MVK      Vial 71      Instrument Name LCMS      User Name  
Inj Vol 2      InjPosition      SampleType      Sample      IRM Calibration Status Not Applicable  
Data Filename 21102020M023.d      ACQ Method MME-SM.m      Comment MM20J037      Acquired Time 10/22/2020 4:11:31 PM

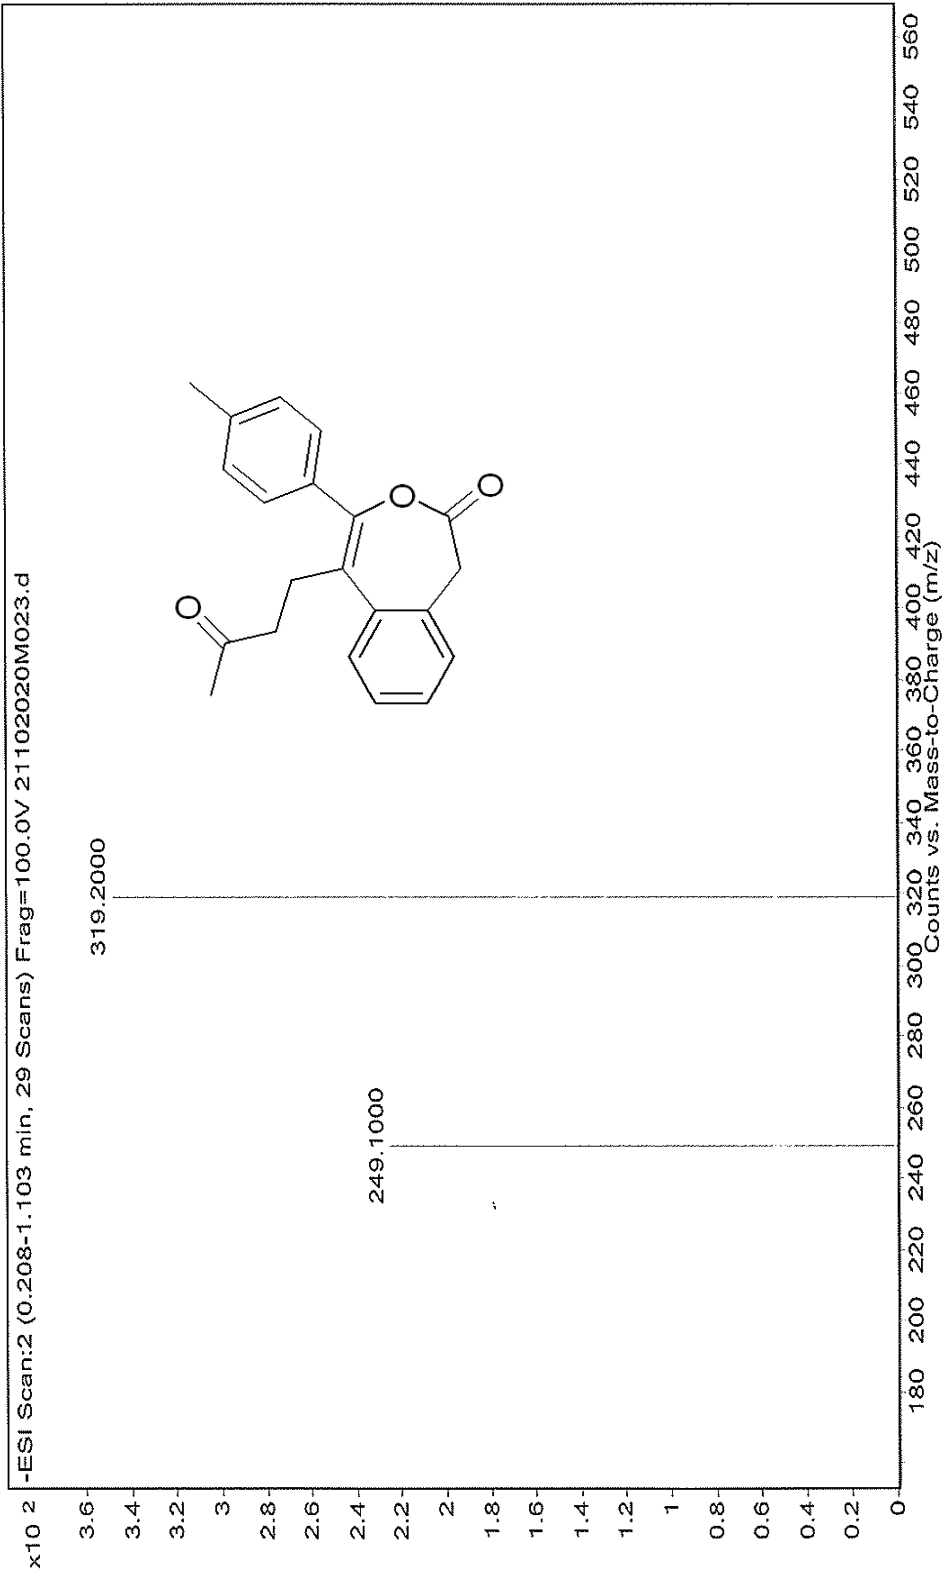

# Mass spectra of compound 3bb

Sample Name ILS-BTG-TPA-NM-MVK Vial 54 Instrument Name LCMS User Name  
Inj Vol 3 Inj Position ACQ Method MMI-SM,m Comment MM203010 Sample MMS Calibration Status Not Applicable  
Data Filename 05102020M015.d ACQ Method MMI-SM,m Comment MM203010 Sample MMS Calibration Status Not Applicable  
10/5/2020 2:56:56 PM

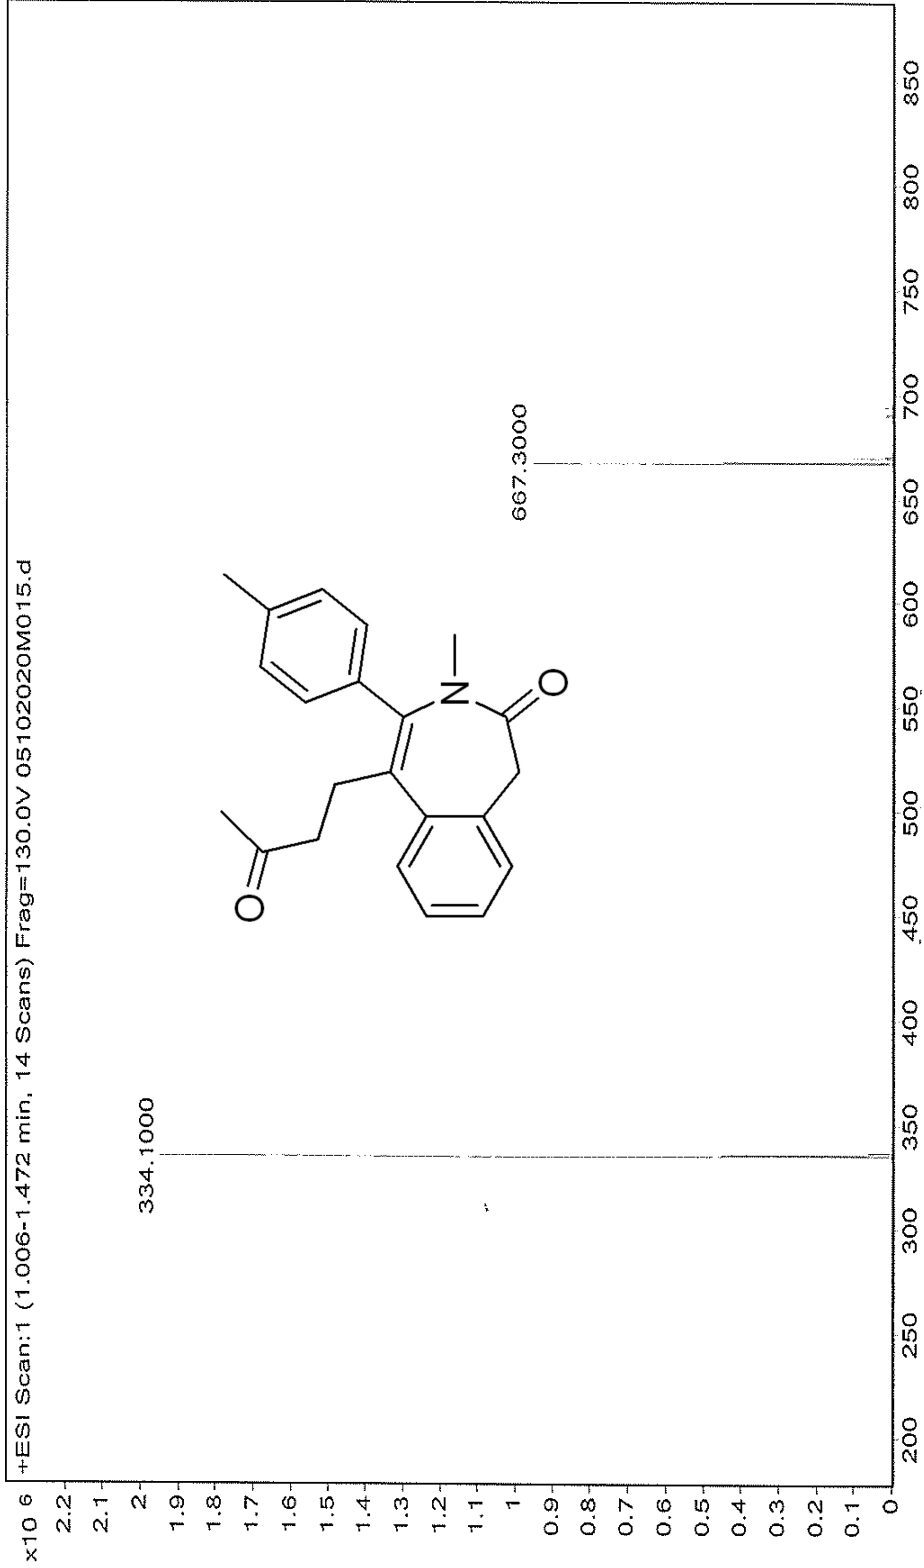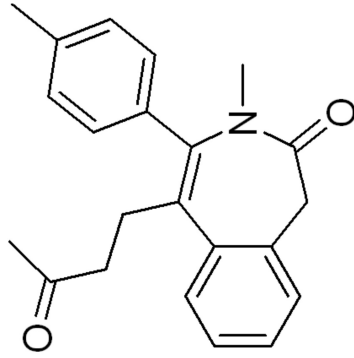

# Mass spectra of compound 3c

Sample Name ILS-BTG-MPA-NM-MVK      Vial 72      Instrument Name LCMS      User Name      Not Applicable  
Inj Vol 2      Inj Position      SampleType      IRM Calibration Status  
Data Filename 21102020M024.d      ACQ Method MM1-SM.m      Comment MM20J038      Acquired Time 10/22/2020 4:14:28 PM

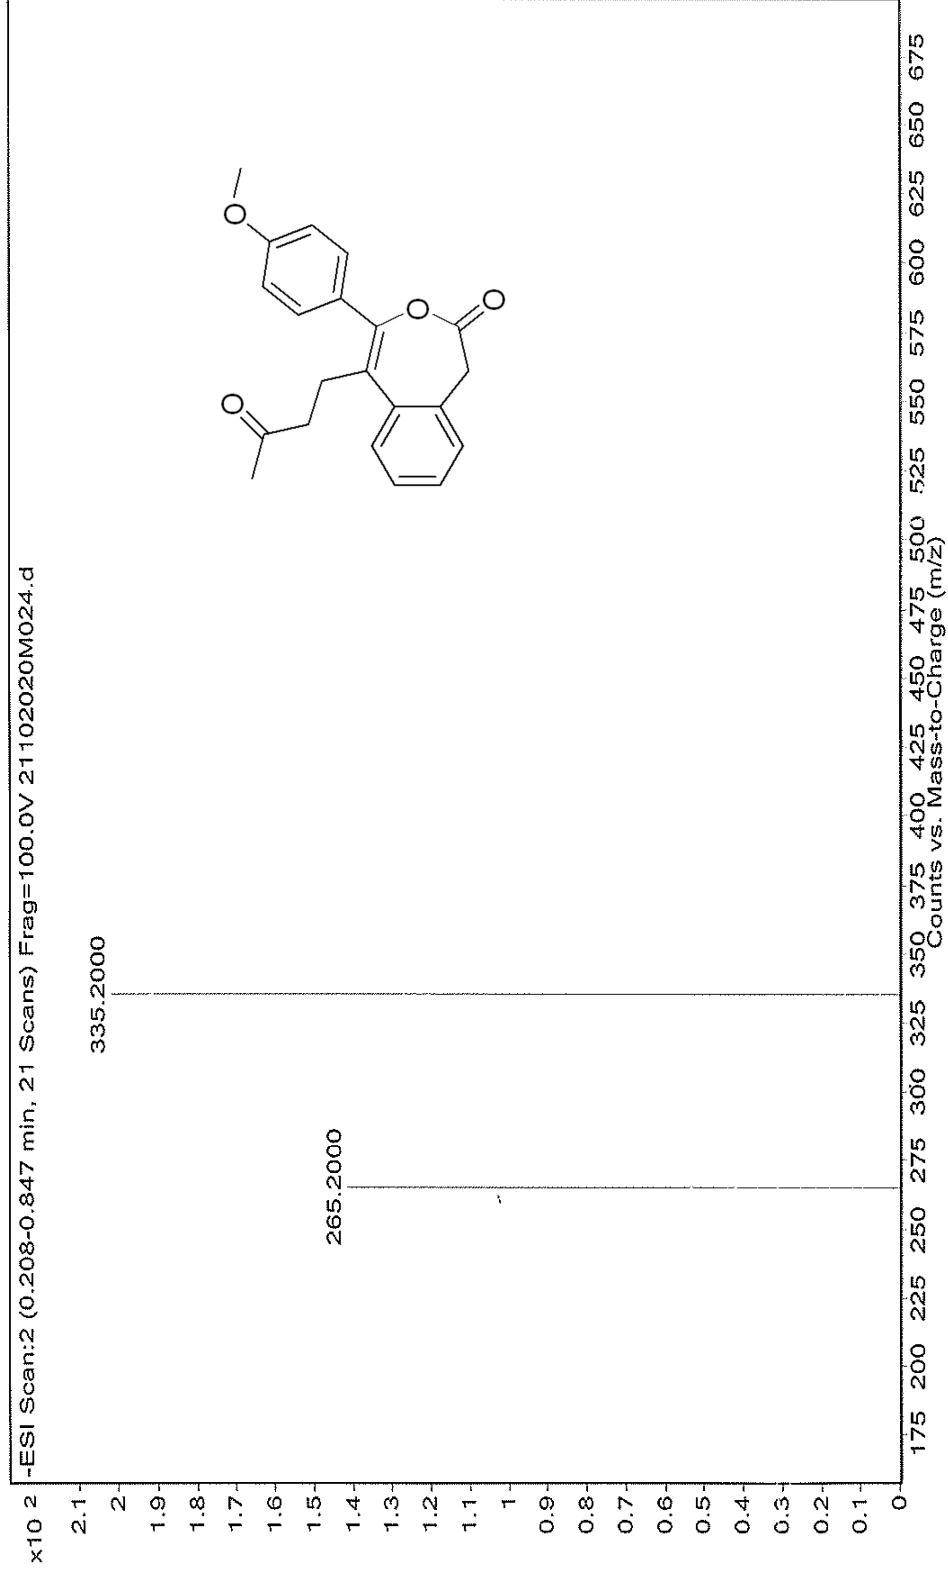

# Mass spectra of compound 3d

Sample Name ILS-BTG-FPA-NM-MVK Position Vial 9 Instrument Name LCMS User Name  
Inj Vol 2 InjPosition ACQ Method NPL-SM.m Comment MM200045 IRM Calibration Status Not Applicable  
Data Filename 26102020H008.d ACQ Method NPL-SM.m Comment MM200045 Acquired Time 10/26/2020 4:12:40 PM

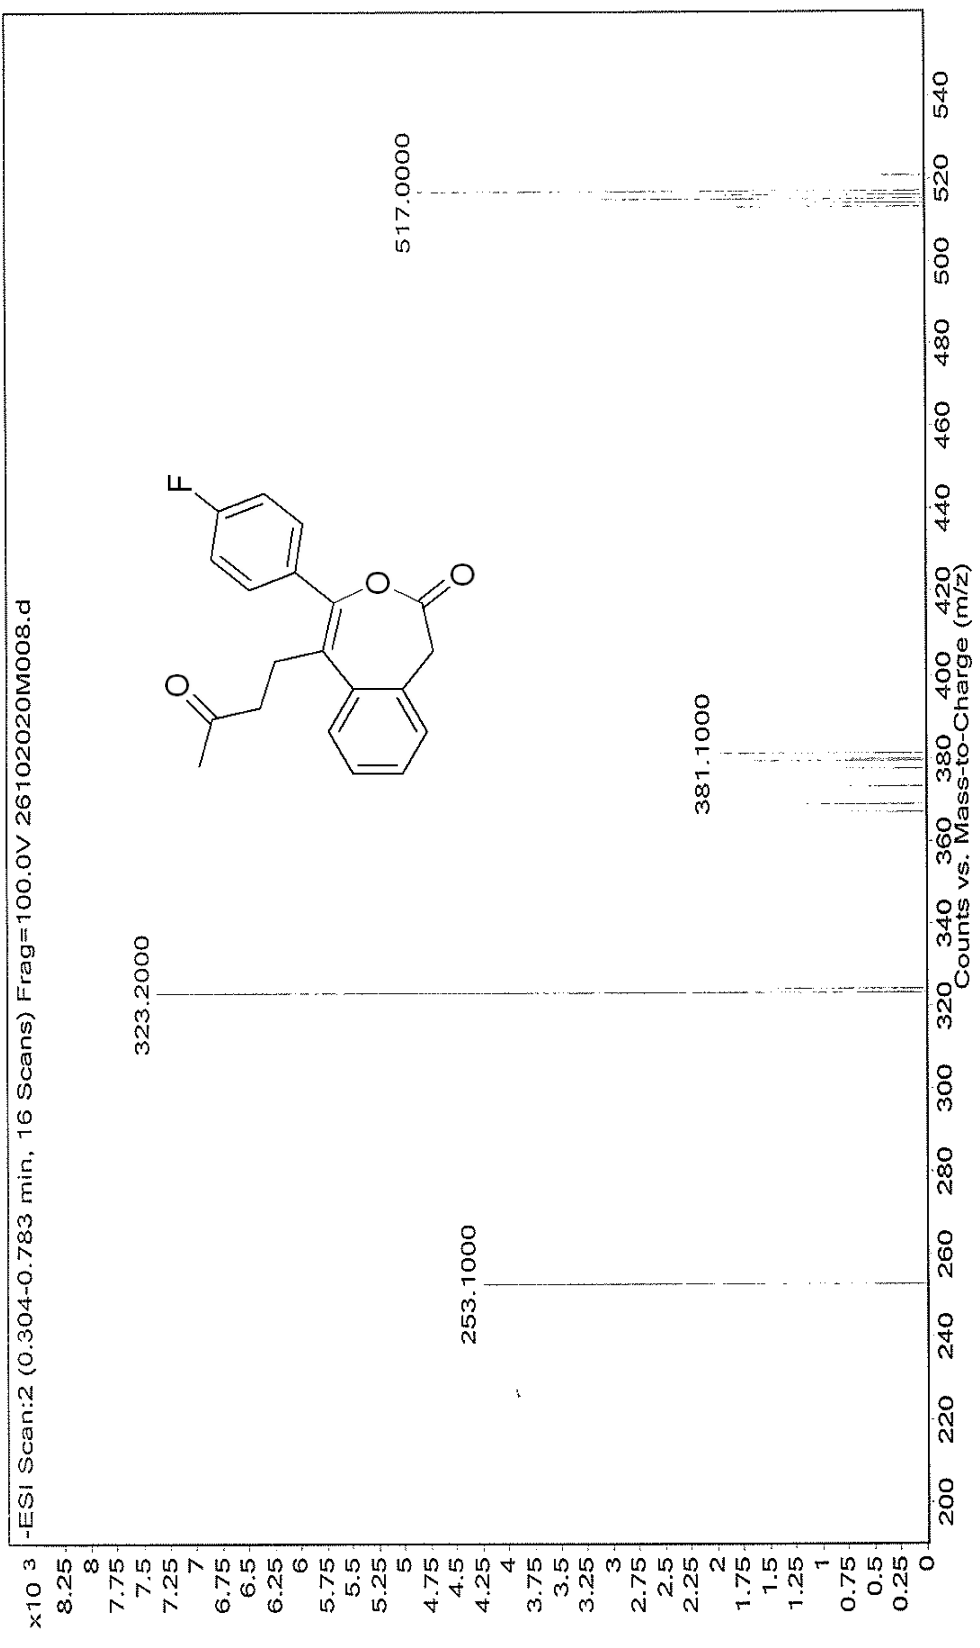

*Handwritten signature and date:*  
27/10/2020



# Mass spectra of compound 3e

**Sample Name** ILS/BTG/DIPFA/NM-MVK **Position** Vial 15 **User Name**  
**Inj Vol** 2 **InjPosition** **Instrument Name** LCMS **IRM Calibration Status** Not Applicable  
**Data Filename** 21092020M020.d **ACQ Method** MMI-SM.m **Sample Comment** MM20I045 **Acquired Time** 9/21/2020 1:40:16 PM

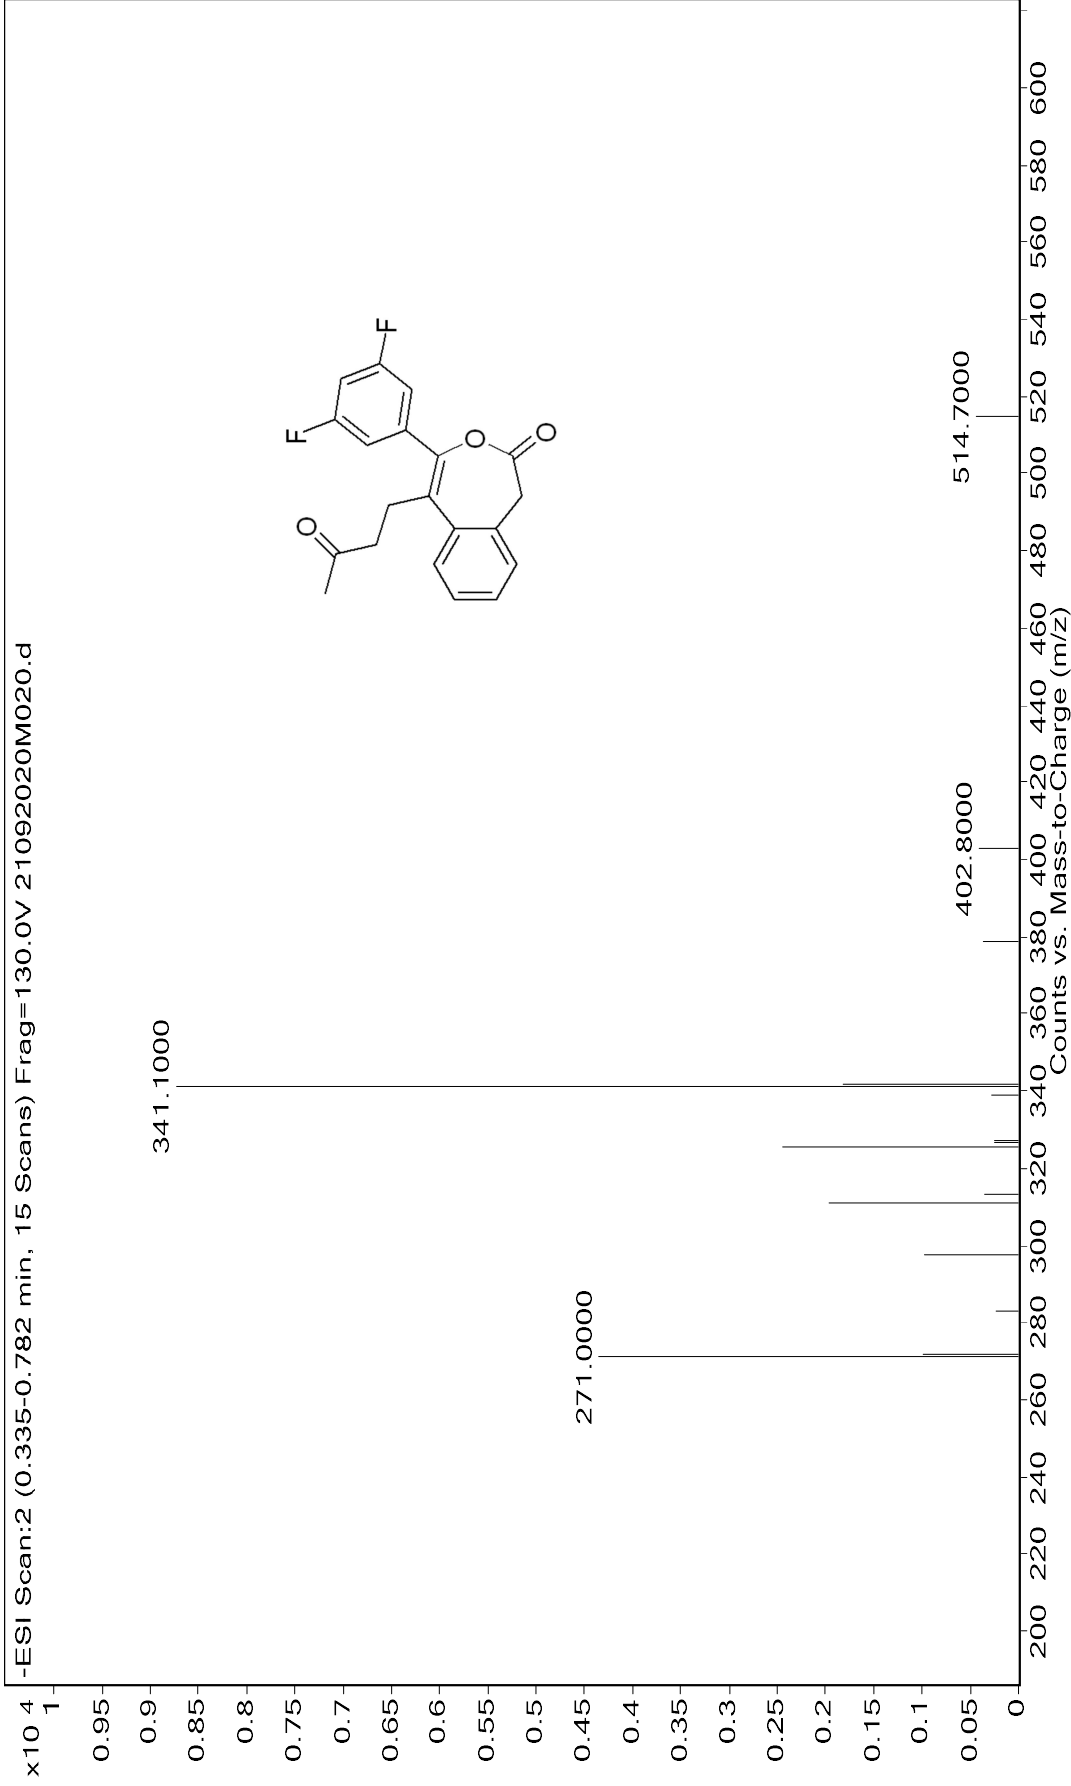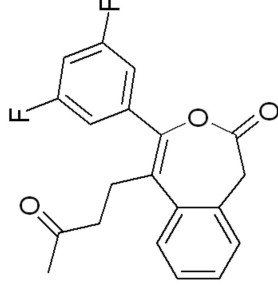

# Mass spectra of compound 3f

**Sample Name** ILS-BTG-MSPA-NM-MVK **Position** Vial 6 **Instrument Name** LCMS **User Name**  
**Inj Vol** 2 **InjPosition** **SampleType** Sample **IRM Calibration Status** Not Applicable  
**Data Filename** 16102020M008.d **ACQ Method** MMI-SM,m **Comment** MM20J027 **Acquired Time** 10/16/2020 2:28:17 PM

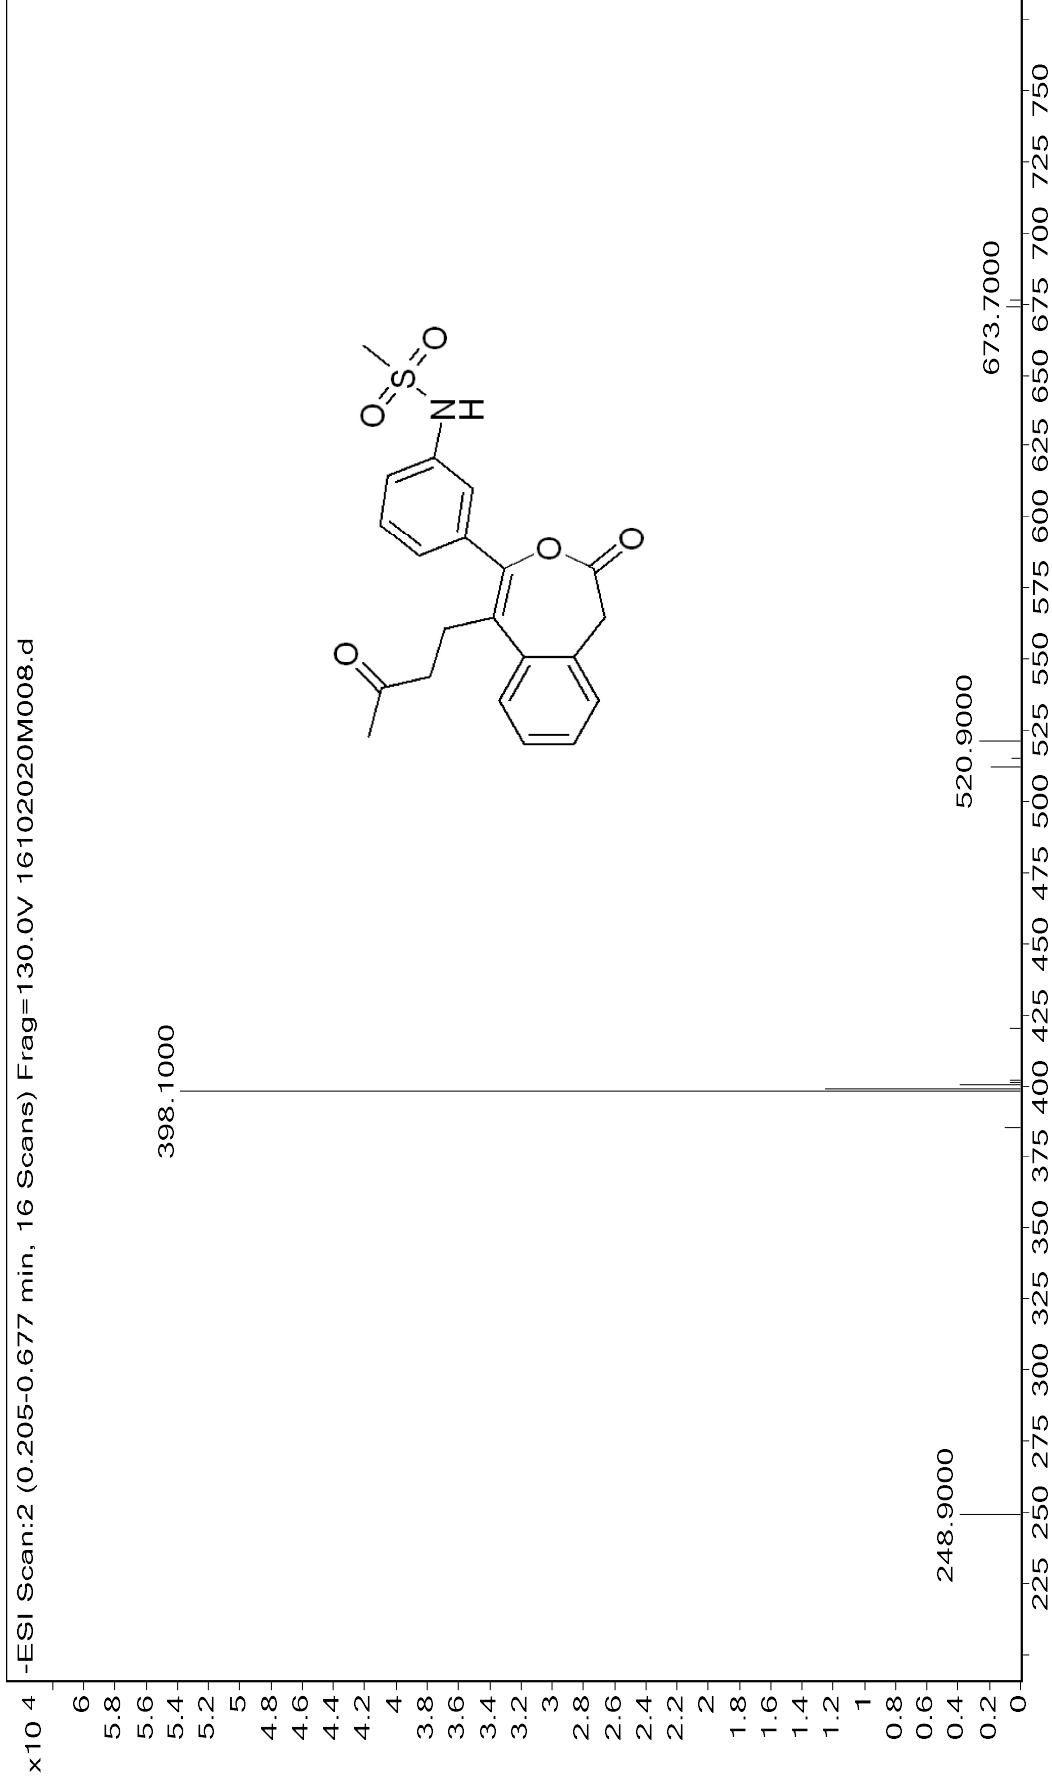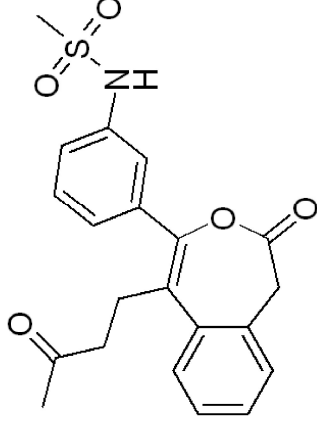

# Mass spectra of compound 3g

|                      |                      |                    |          |                               |                      |
|----------------------|----------------------|--------------------|----------|-------------------------------|----------------------|
| <b>Sample Name</b>   | ILS/BTG/4BZPA/NM/MVK | <b>Position</b>    | Vial 10  | <b>User Name</b>              | Not Applicable       |
| <b>Inj Vol</b>       | 2                    | <b>InjPosition</b> | MMI-SM,m | <b>IRM Calibration Status</b> | 11/2/2020 4:34:58 PM |
| <b>Data Filename</b> | 02112020M011.d       | <b>ACQ Method</b>  | MMI-SM,m | <b>Acquired Time</b>          |                      |

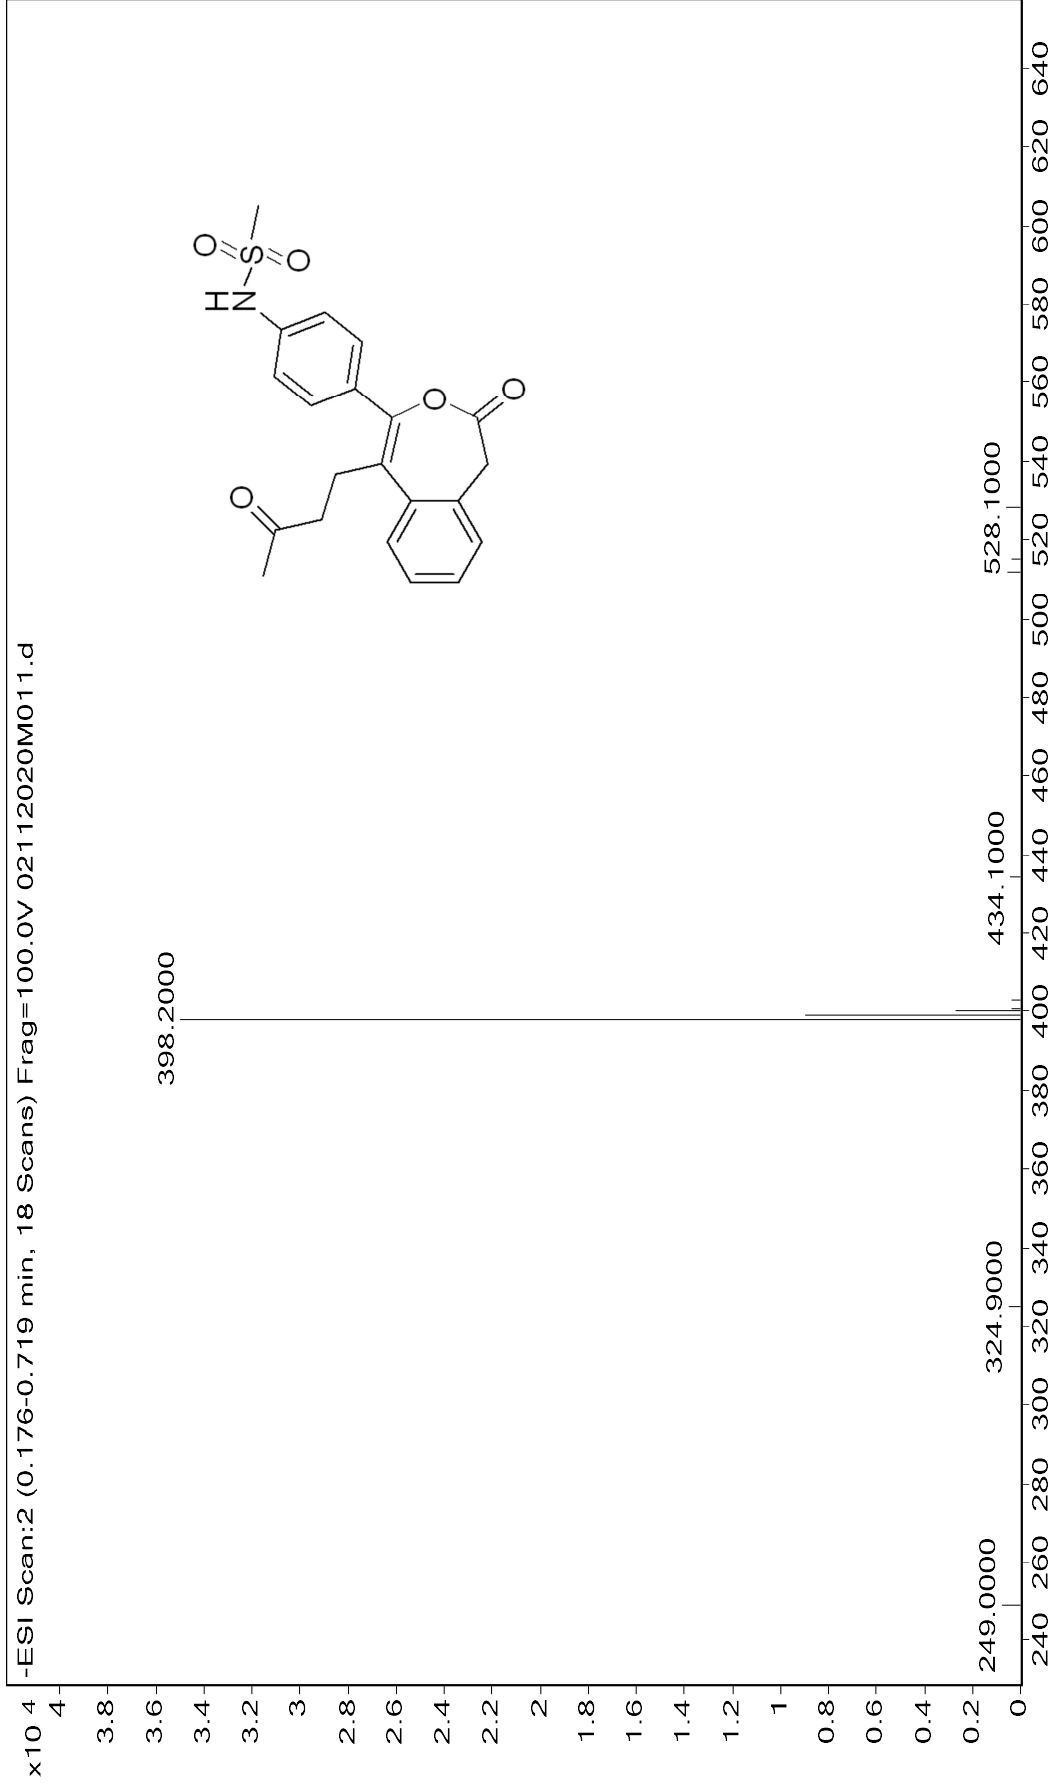

# Mass spectra of compound 3h

Sample Name ILS-BTG-BSPA-NM-MVK    Vial 25    Instrument Name LCMS    User Name  
Inj Vol 3    InjPosition    SampleType Sample    IRM Calibration Status Not Applicable  
Data Filename 23092020M025.d    ACQ Method MMI-SM.m    Comment MM20J059    Acquired Time 9/23/2020 4:48:21 PM

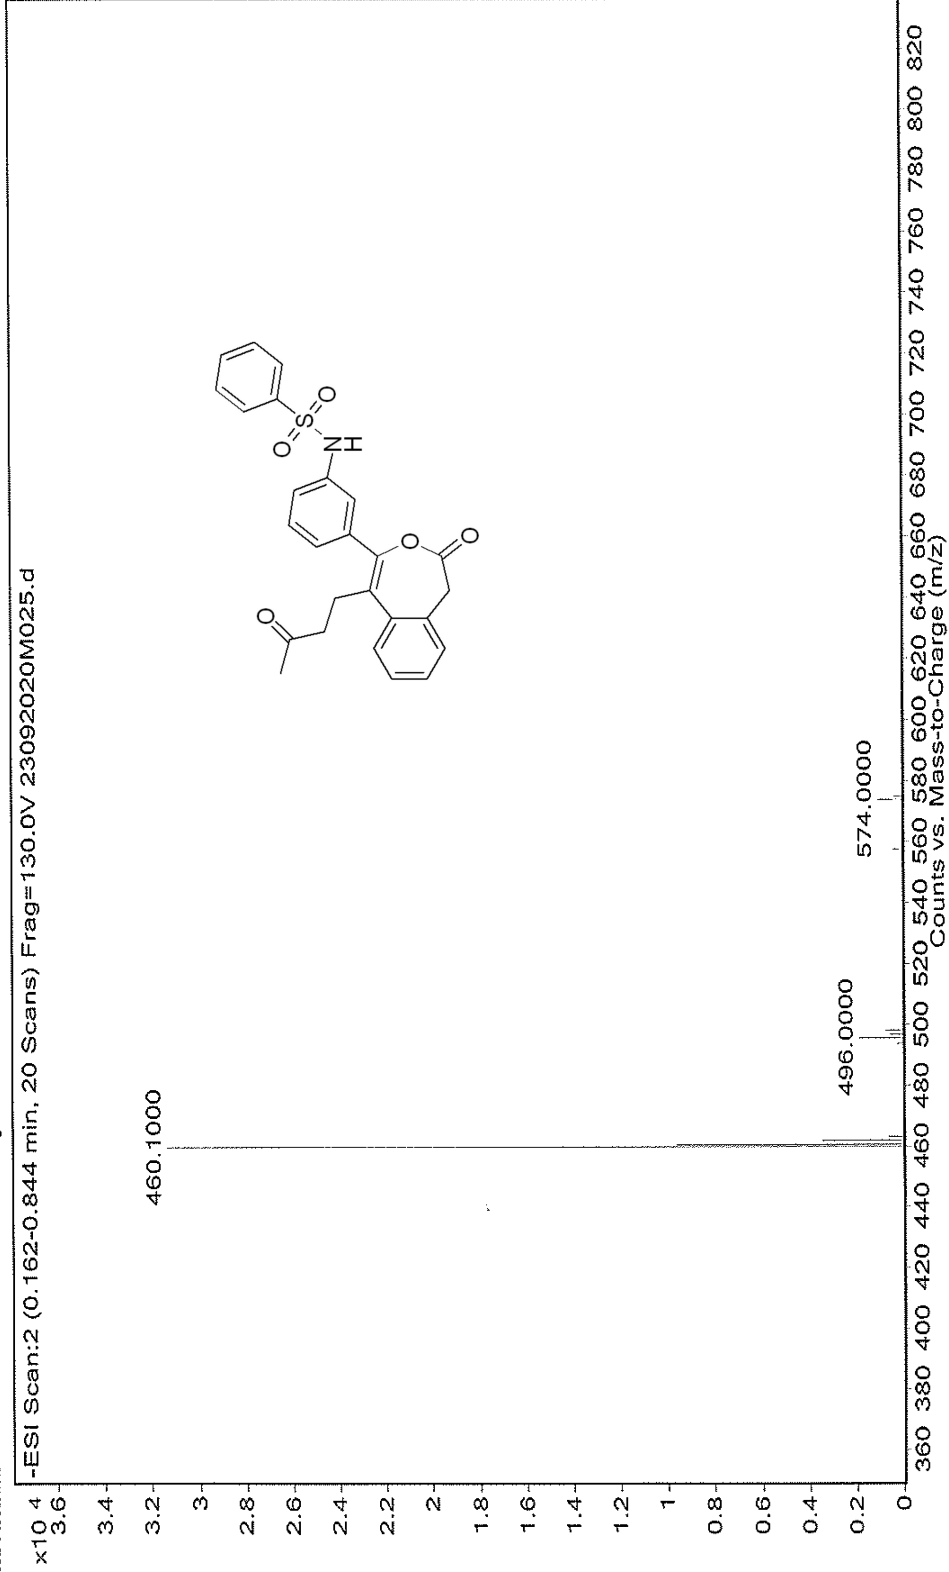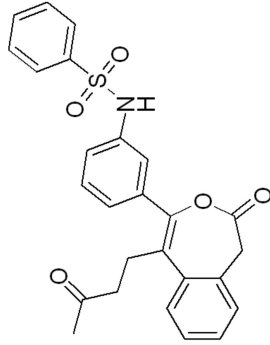

# Mass spectra of compound 3i

Sample Name ILS-BTG-4BSPA-NM-MVK Position Vial 8 User Name  
Inj Vol 2 InjPosition InjPosition IRM Calibration Status Not Applicable  
Data Filename 26102020M007.d ACQ Method MMI-5M.m Comment MM20J044 Acquired Time 10/26/2020 4:09:40 PM

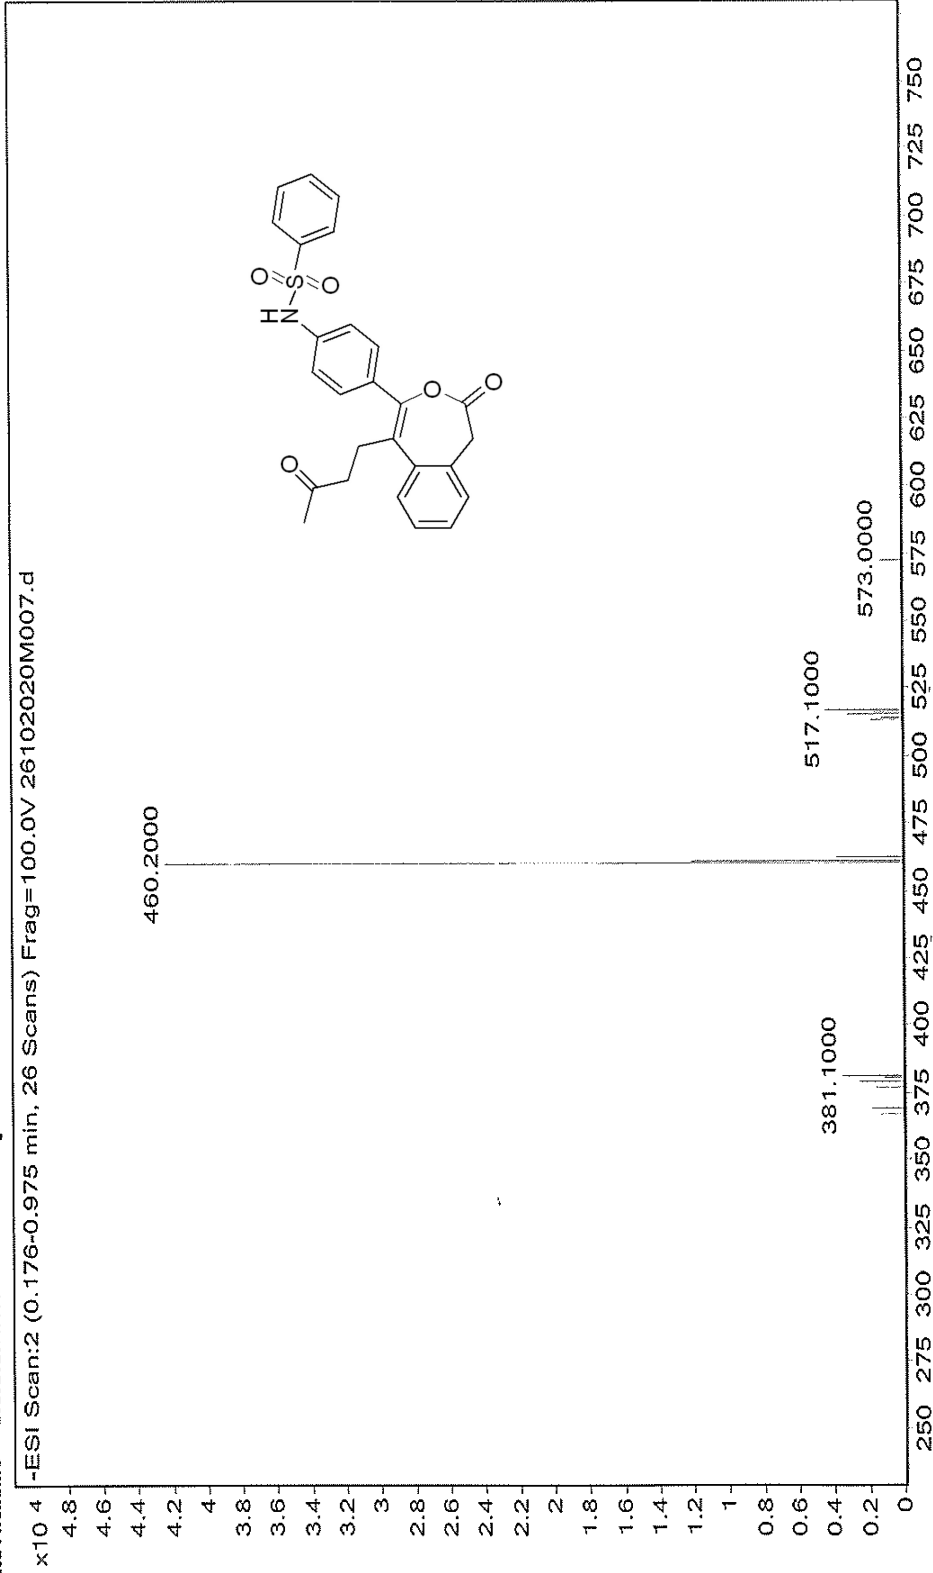

# Mass spectra of compound 3j

Sample Name ILS/BTGT/SPA/NM-MVK      Instrument Name LCMS      User Name  
Inj Vol 2      SampleType Sample      IRM Calibration Status Not Applicable  
Data Filename 032102020M007.d      Comment MM20J006      Acquired Time 10/3/2020 12:22:25 PM

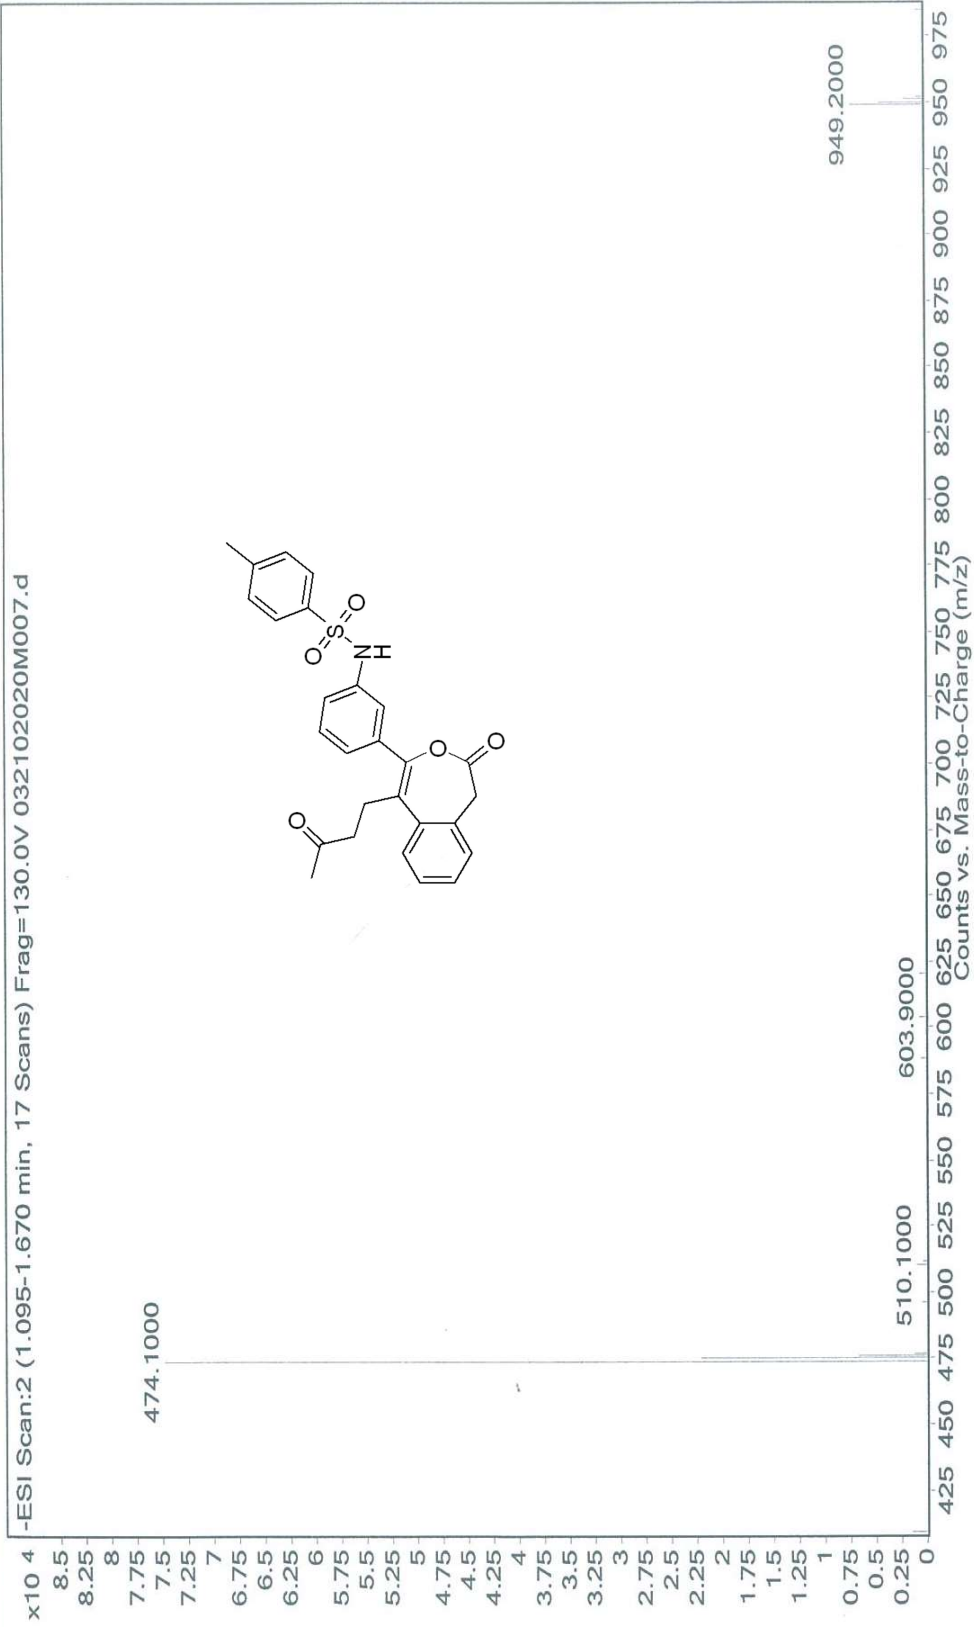

*Handwritten signature and date:*  
02/10/2020

# Mass spectra of compound 3k

Sample Name ILS/BTG/4TSPA/MM-MVK Position Vial 18 Instrument Name LCMS User Name  
Inj Vol 2 InjPosition ACQ Method MMI-SM.m Comment MM203024 Sample MM203024 IRM Calibration Status  
Data Filename 13102020M024.d ACQ Method MMI-SM.m Comment MM203024 Sample MM203024 IRM Calibration Status  
Not Applicable  
10/13/2020 5:49:04 PM  
Acquired Time

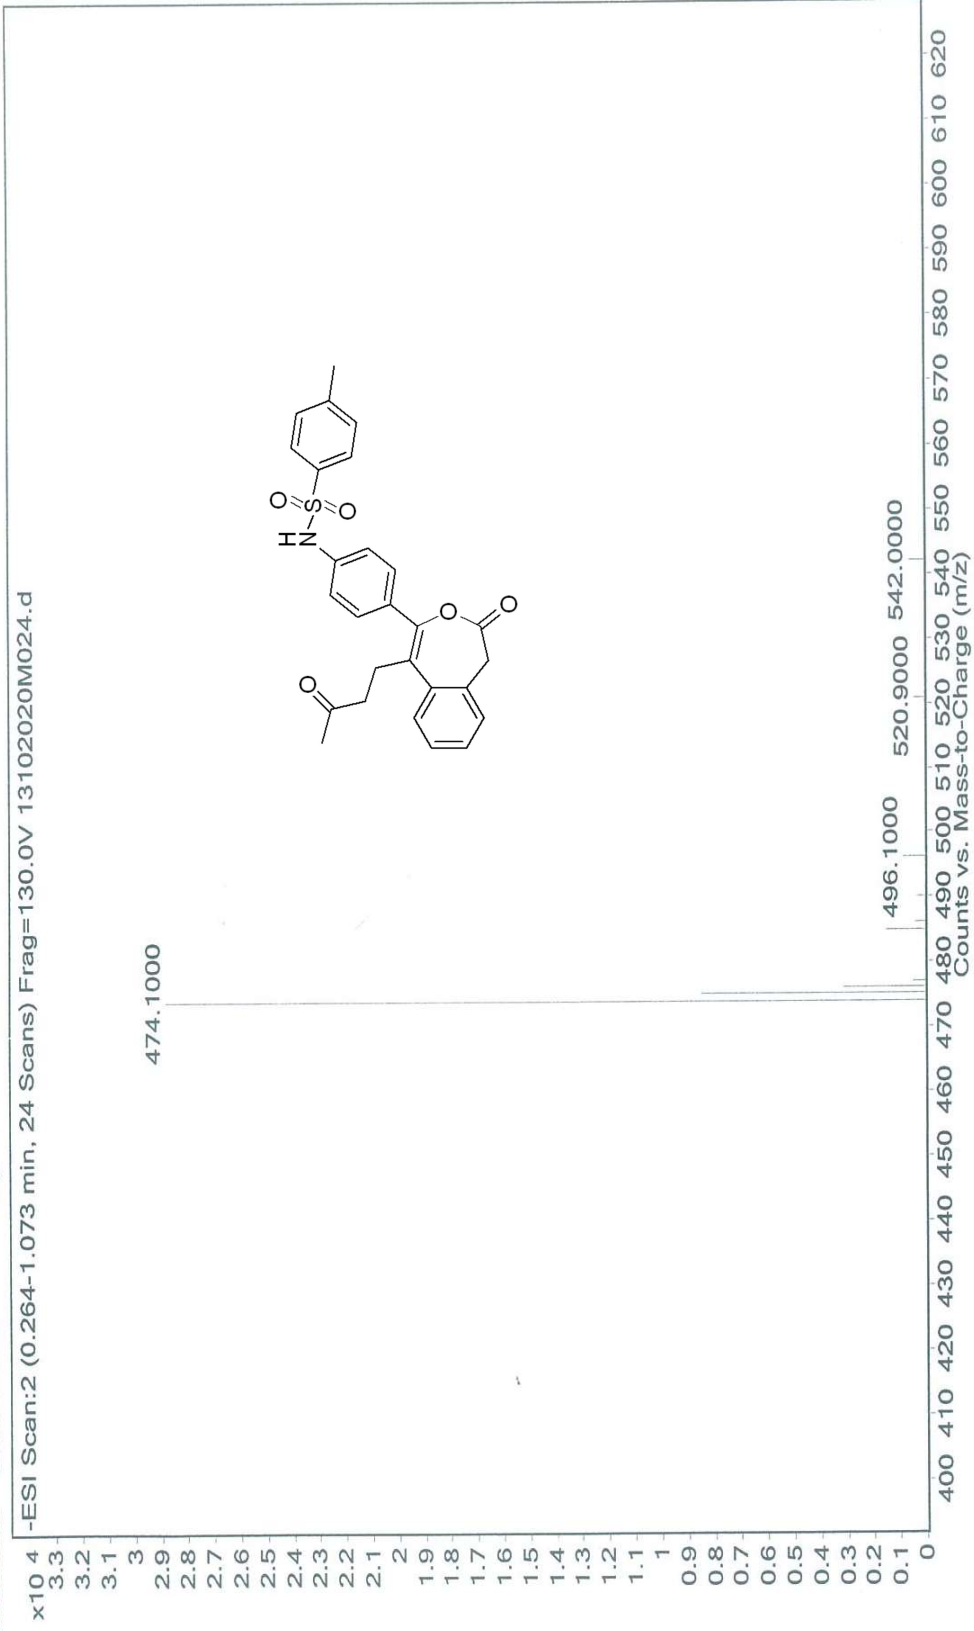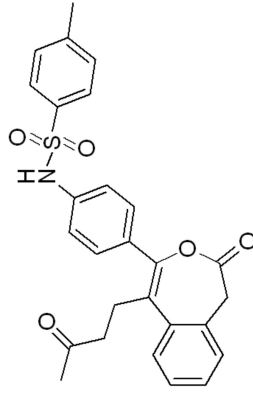

*Handwritten signature and date:*  
14/10/2020

# Mass spectra of compound 31

Sample Name ILS/BTG/TPSPA/NM-MVK      Vial 56      Instrument Name LCMS      User Name  
Inj Vol 2      InjPosition      SampleType      IRM Calibration Status  
Data Filename 08102020M017.d      ACQ Method MMI-SM.m      Comment MM20J019      Acquired Time 10/8/2020 5:00:37 PM  
Not Applicable

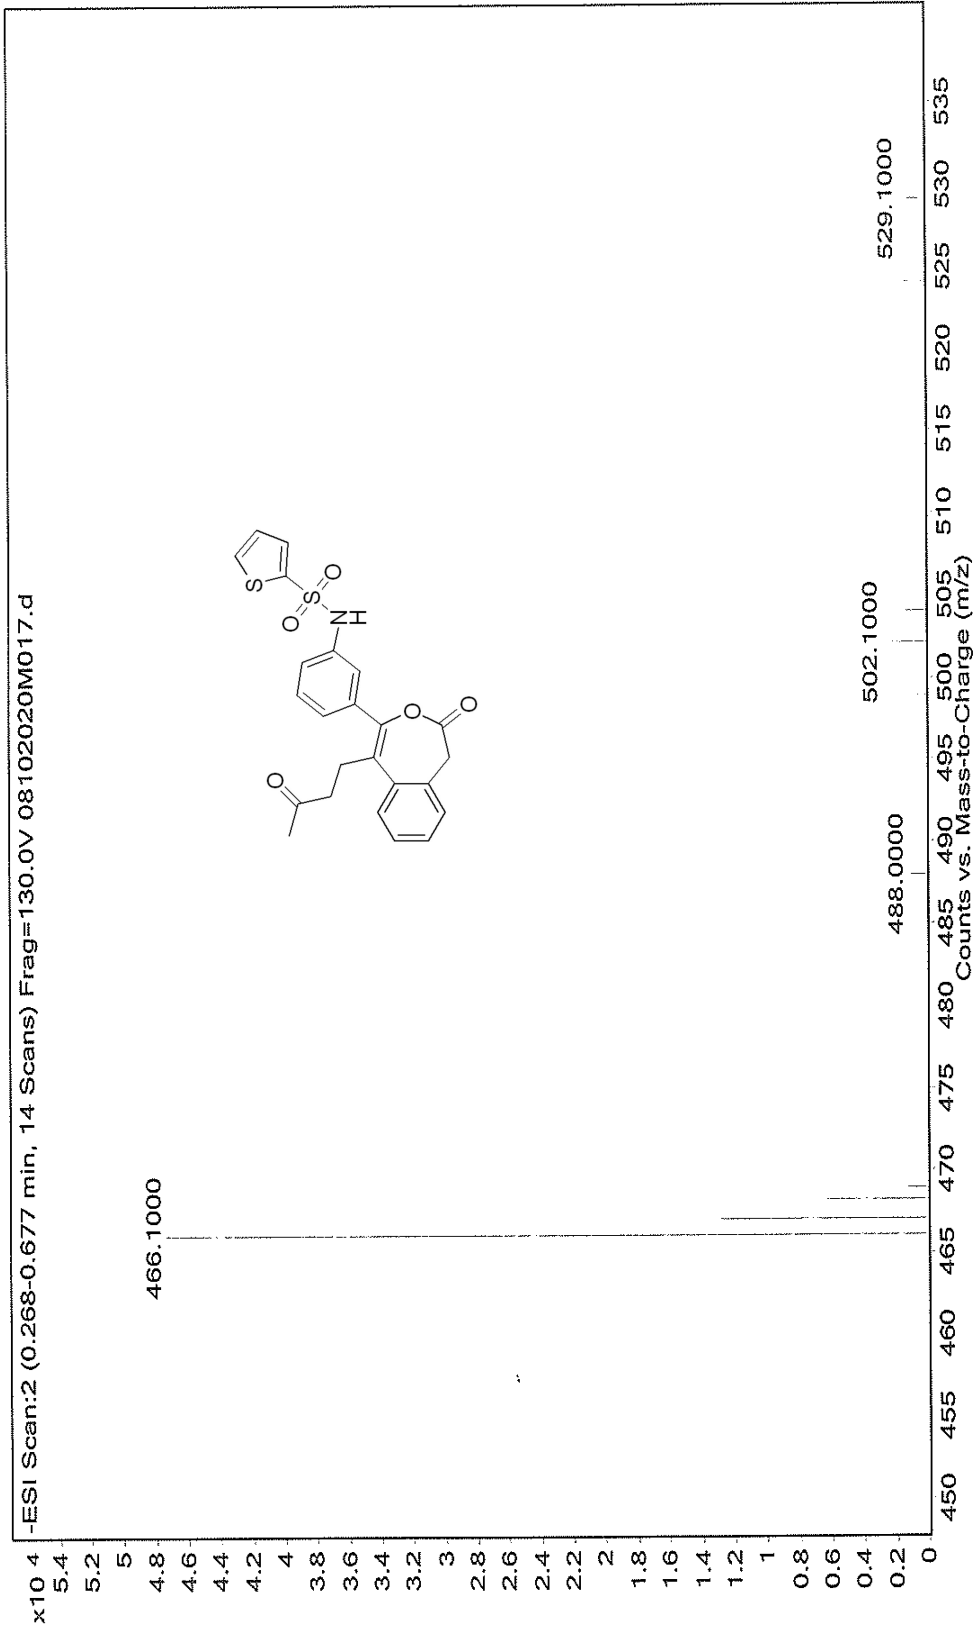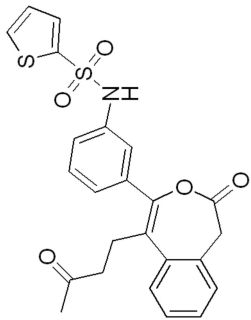



# Mass spectra of compound 3m

**Sample Name** ILS-BTG-4TPSAPA-NM-M **Position** Vial 30 **User Name**   
**Inj Vol** 2 **InjPosition** **Instrument Name** LCMS **Sample** **IRM Calibration Status** Not Applicable   
**Data Filename** 03112020M010.d **ACQ Method** MMI-SM.m **Comment** MM20K008 **Acquired Time** 11/3/2020 2:06:28 PM

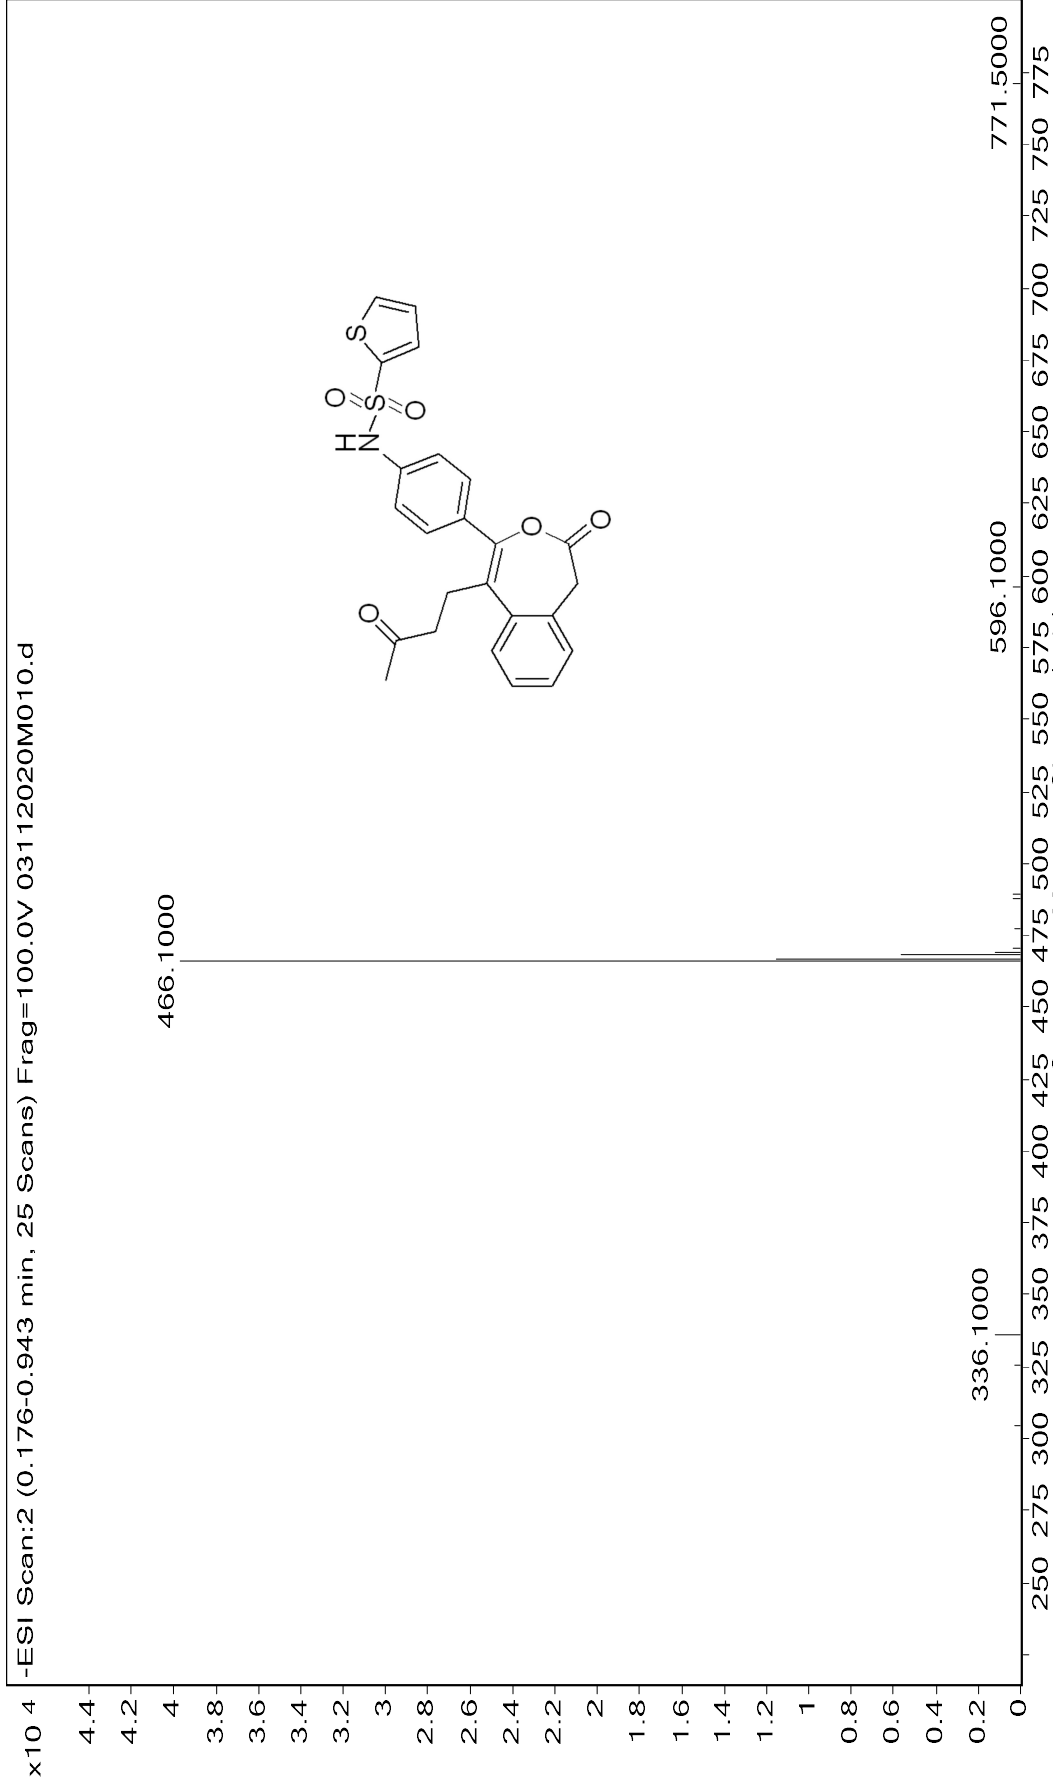

# Mass spectra of compound 3n

**Sample Name** ILS/BTG/MTPSA-NM-MVK **Position** Vial 53 **User Name**  
**Inj Vol** 2 **InjPosition** **Instrument Name** LCMS **Sample** **IRM Calibration Status** Not Applicable  
**Data Filename** 29102020M016.d **ACQ Method** MMI-SM.m **Comment** MM20J049 **Acquired Time** 10/29/2020 4:02:36 PM

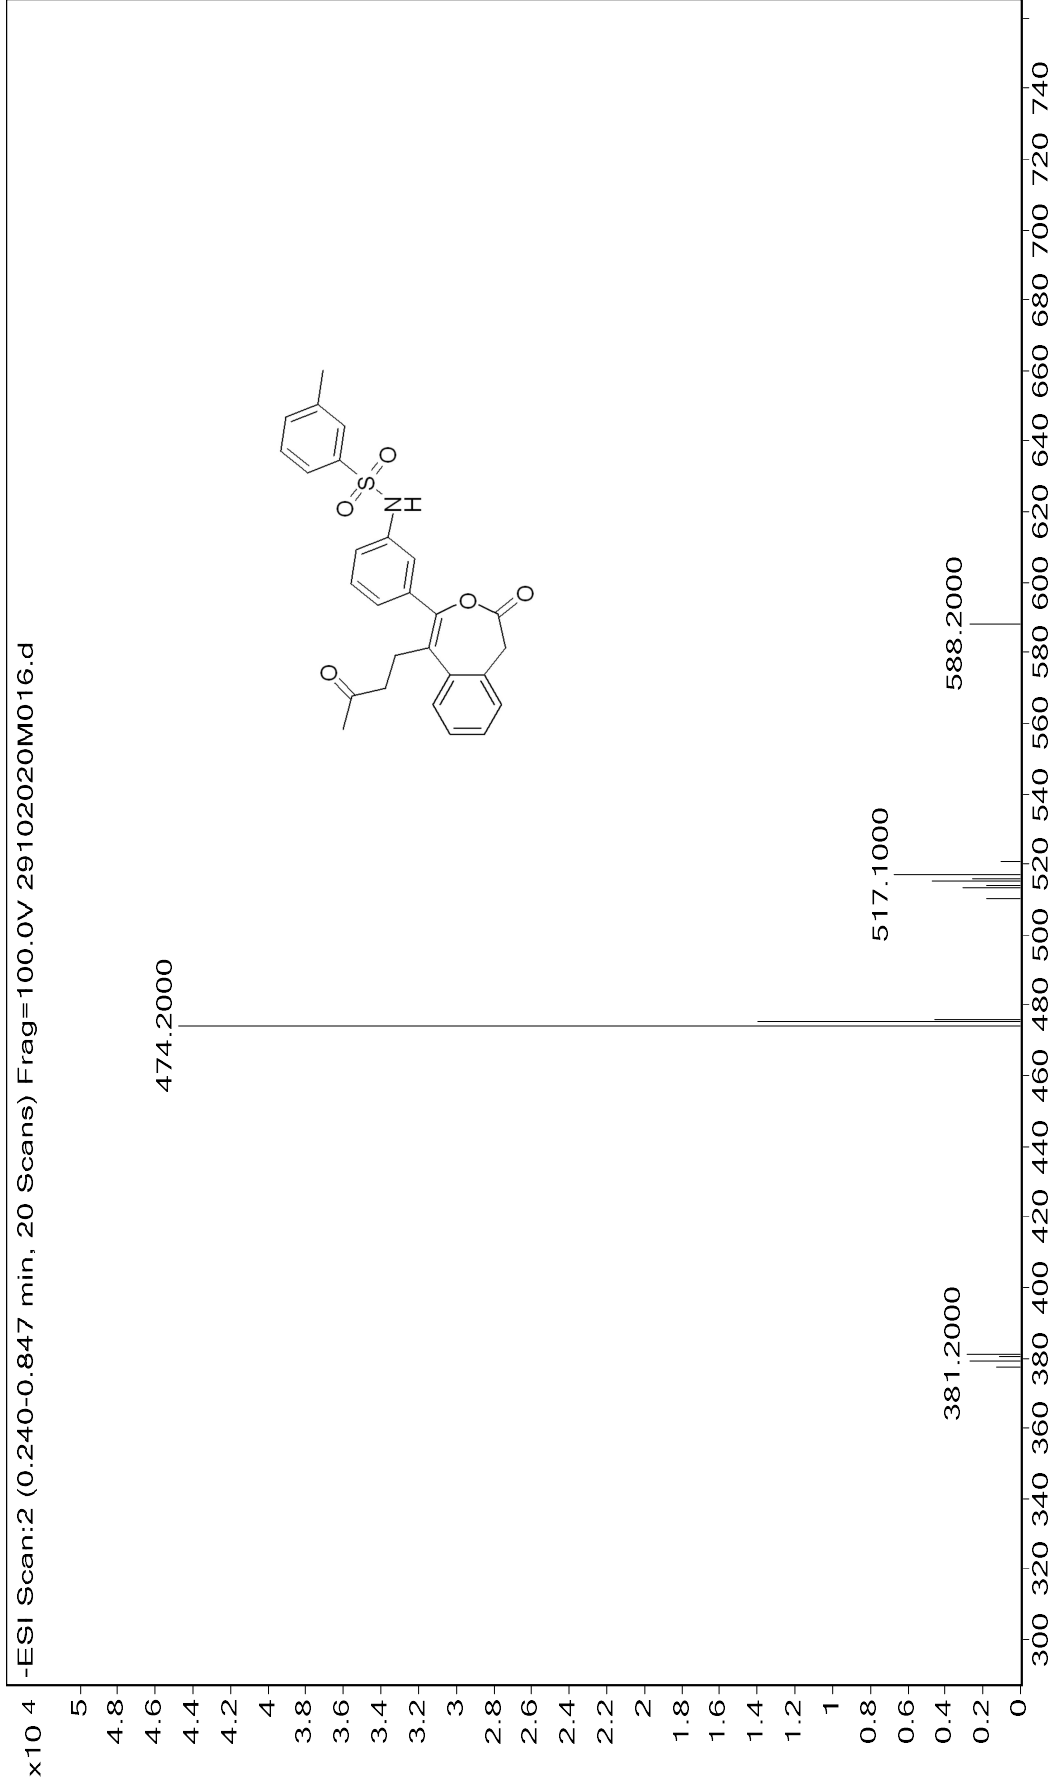

# Mass spectra of compound 4a

**Sample Name** ILS-BTG-PA-NM-AI **Position** Vial 34 **Instrument Name** LCMS **User Name**  
**Inj Vol** 5 **InjPosition** **SampleType** Sample **IRM Calibration Status** Not Applicable  
**Data Filename** 100320M008.d **ACQ Method** MMI-SM,m **Comment** MM20C025 **Acquired Time** 3/10/2020 2:56:58 PM

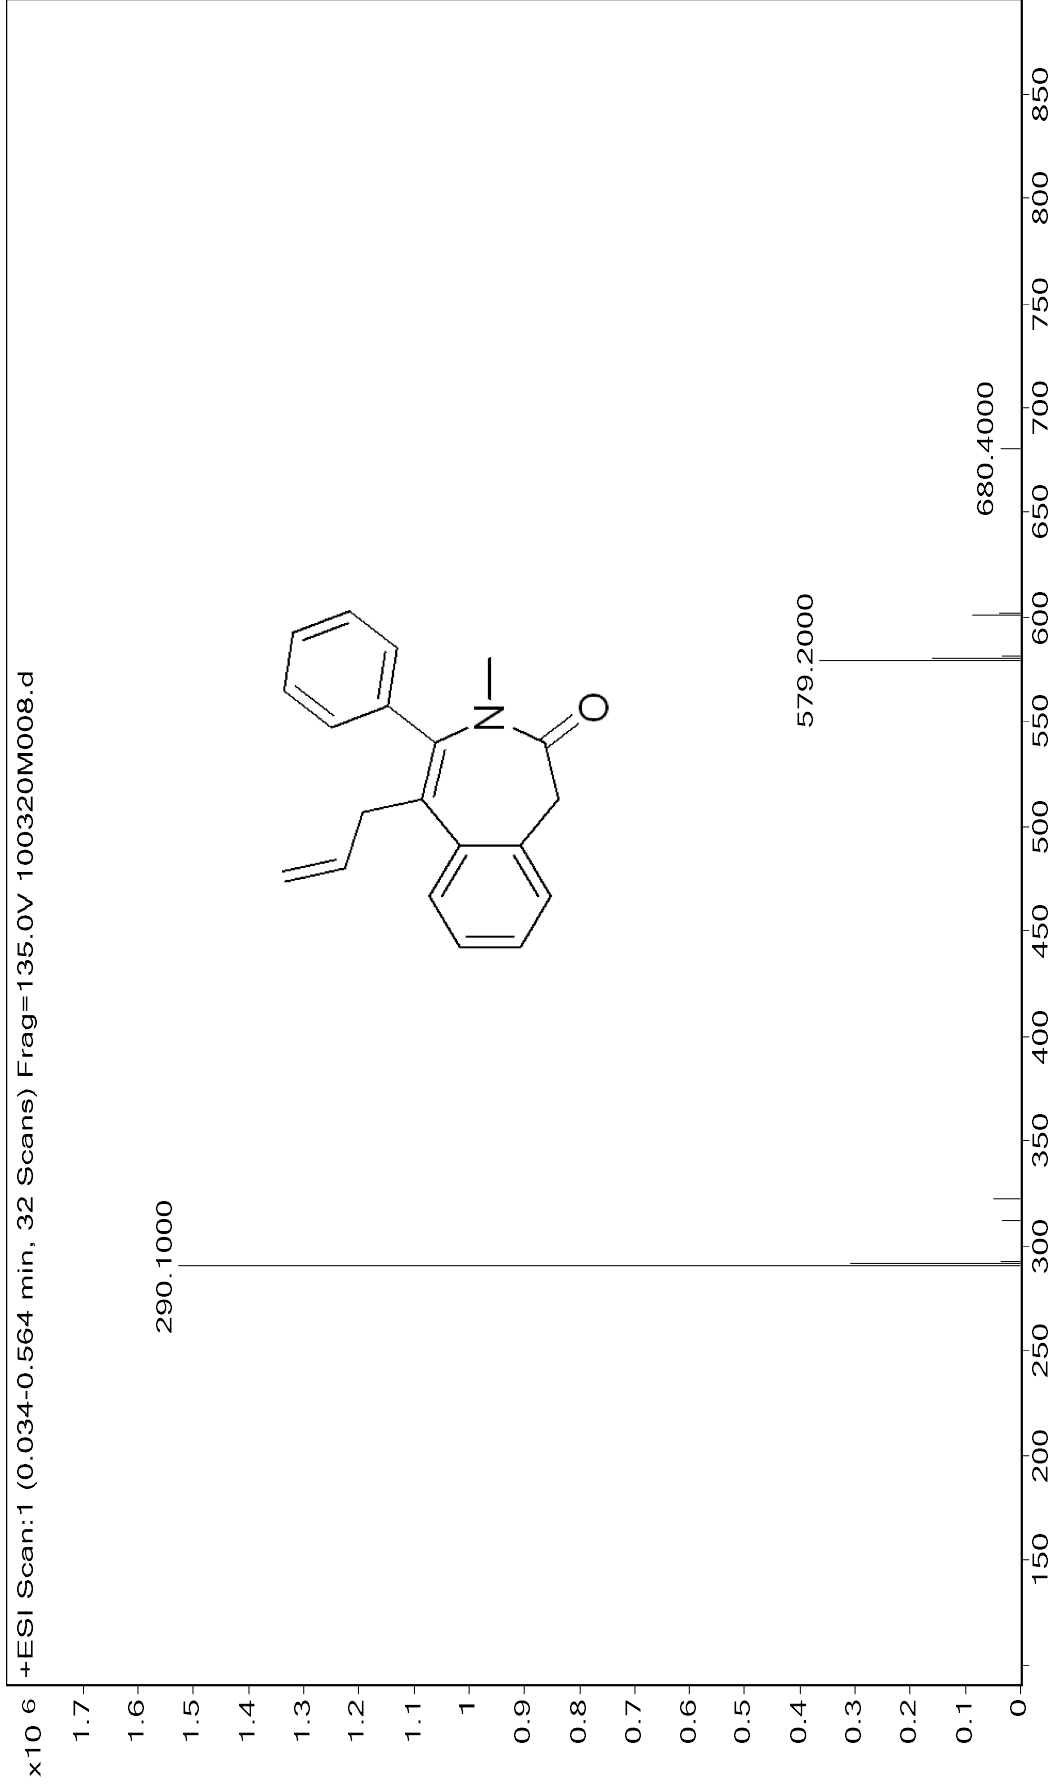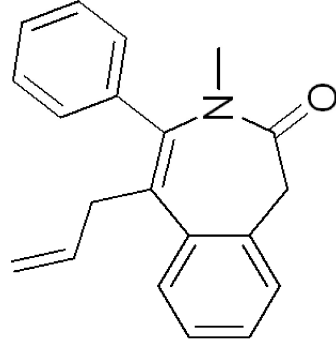

# Mass spectra of compound 4aa

Sample Name ILS-BTG-N-Eth-AL Vial 3 Instrument Name LCMS User Name  
Inj Vol 2 InjPosition ACQ Method MM1-SMI.m Sample MM21G041 IRM Calibration Status Not Applicable  
Data Filename 23072021M004.d ACQ Method MM1-SMI.m Comment MM21G041 Acquired Time 7/23/2021 10:15:09 AM

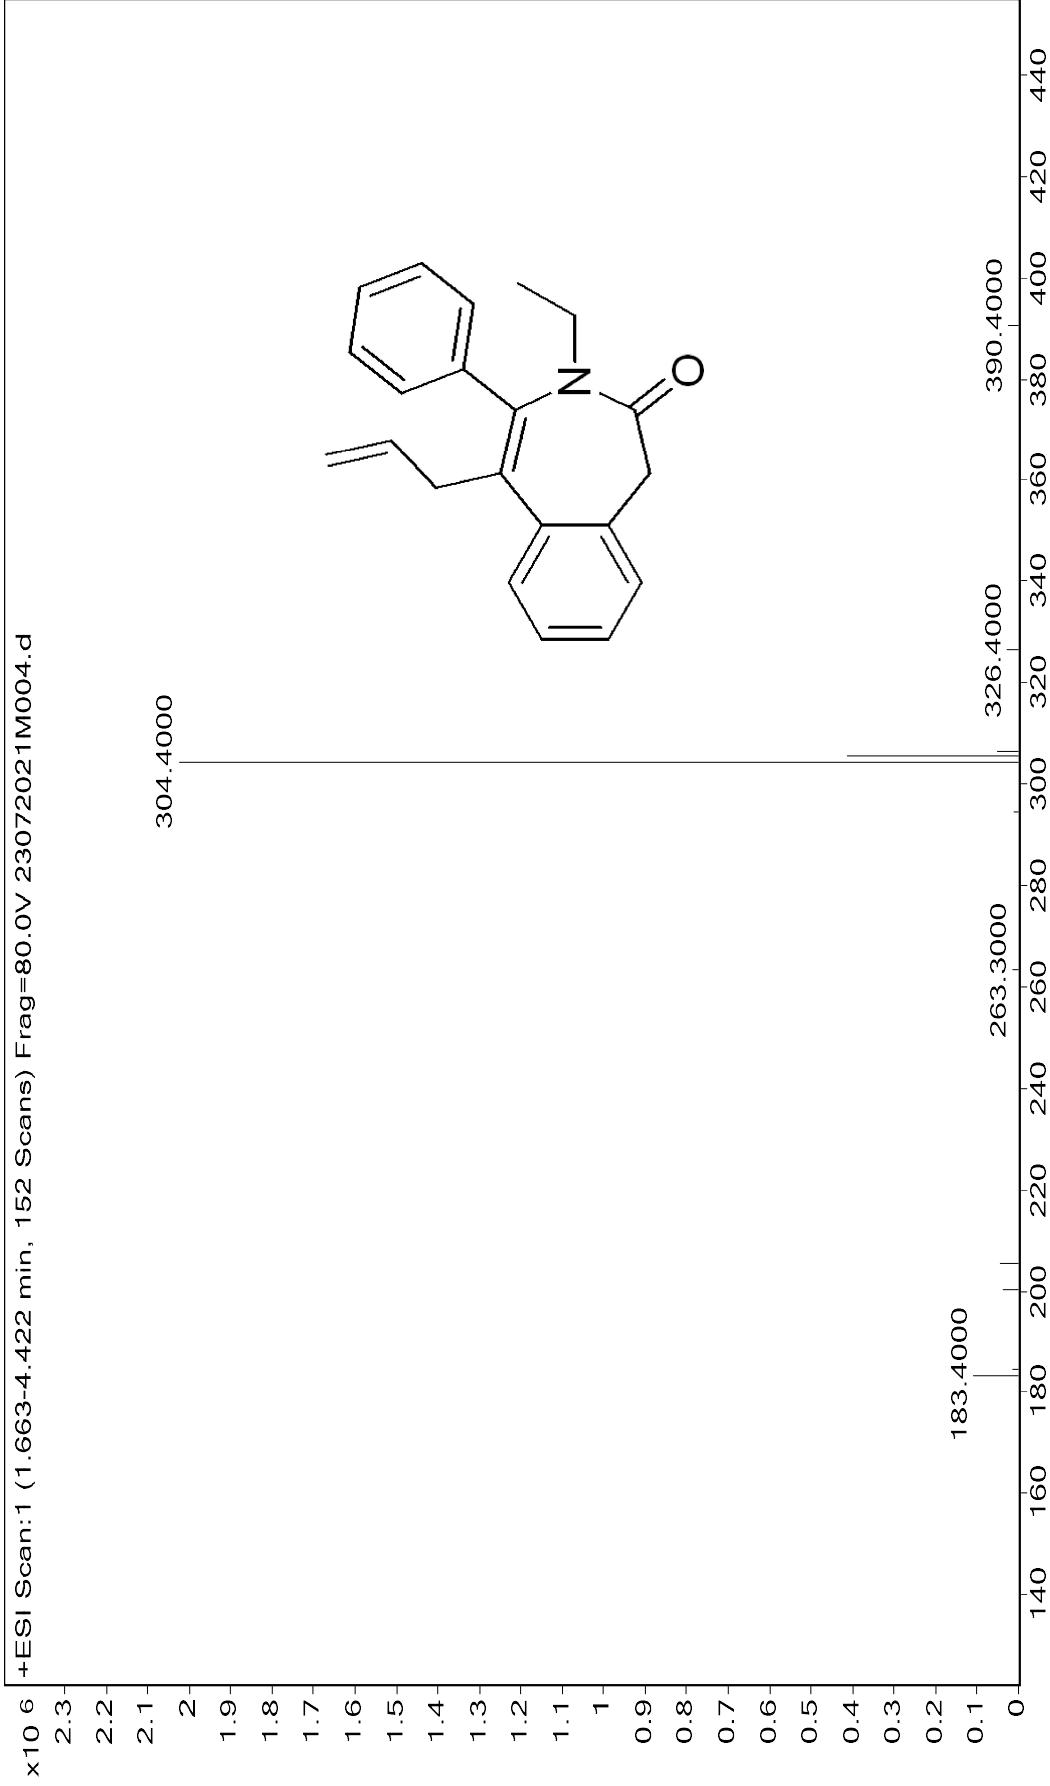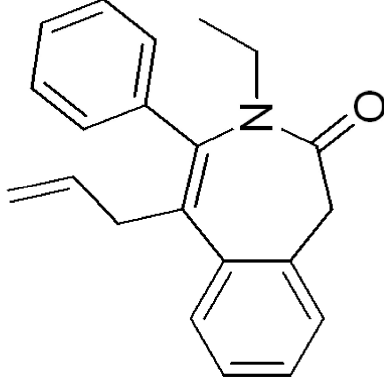

# Mass spectra of compound 4b

**Sample Name** ILS-BTG-TPA-NM-AL **Position** Vial 9 **User Name**  
**Inj Vol** 3 **InjPosition** **Instrument Name** LCMS **IRM Calibration Status** Not Applicable  
**Data Filename** 11112020M009.d **ACQ Method** MMI-SM,m **Sample Comment** MM20K019 **Acquired Time** 11/11/2020 3:36:48 PM

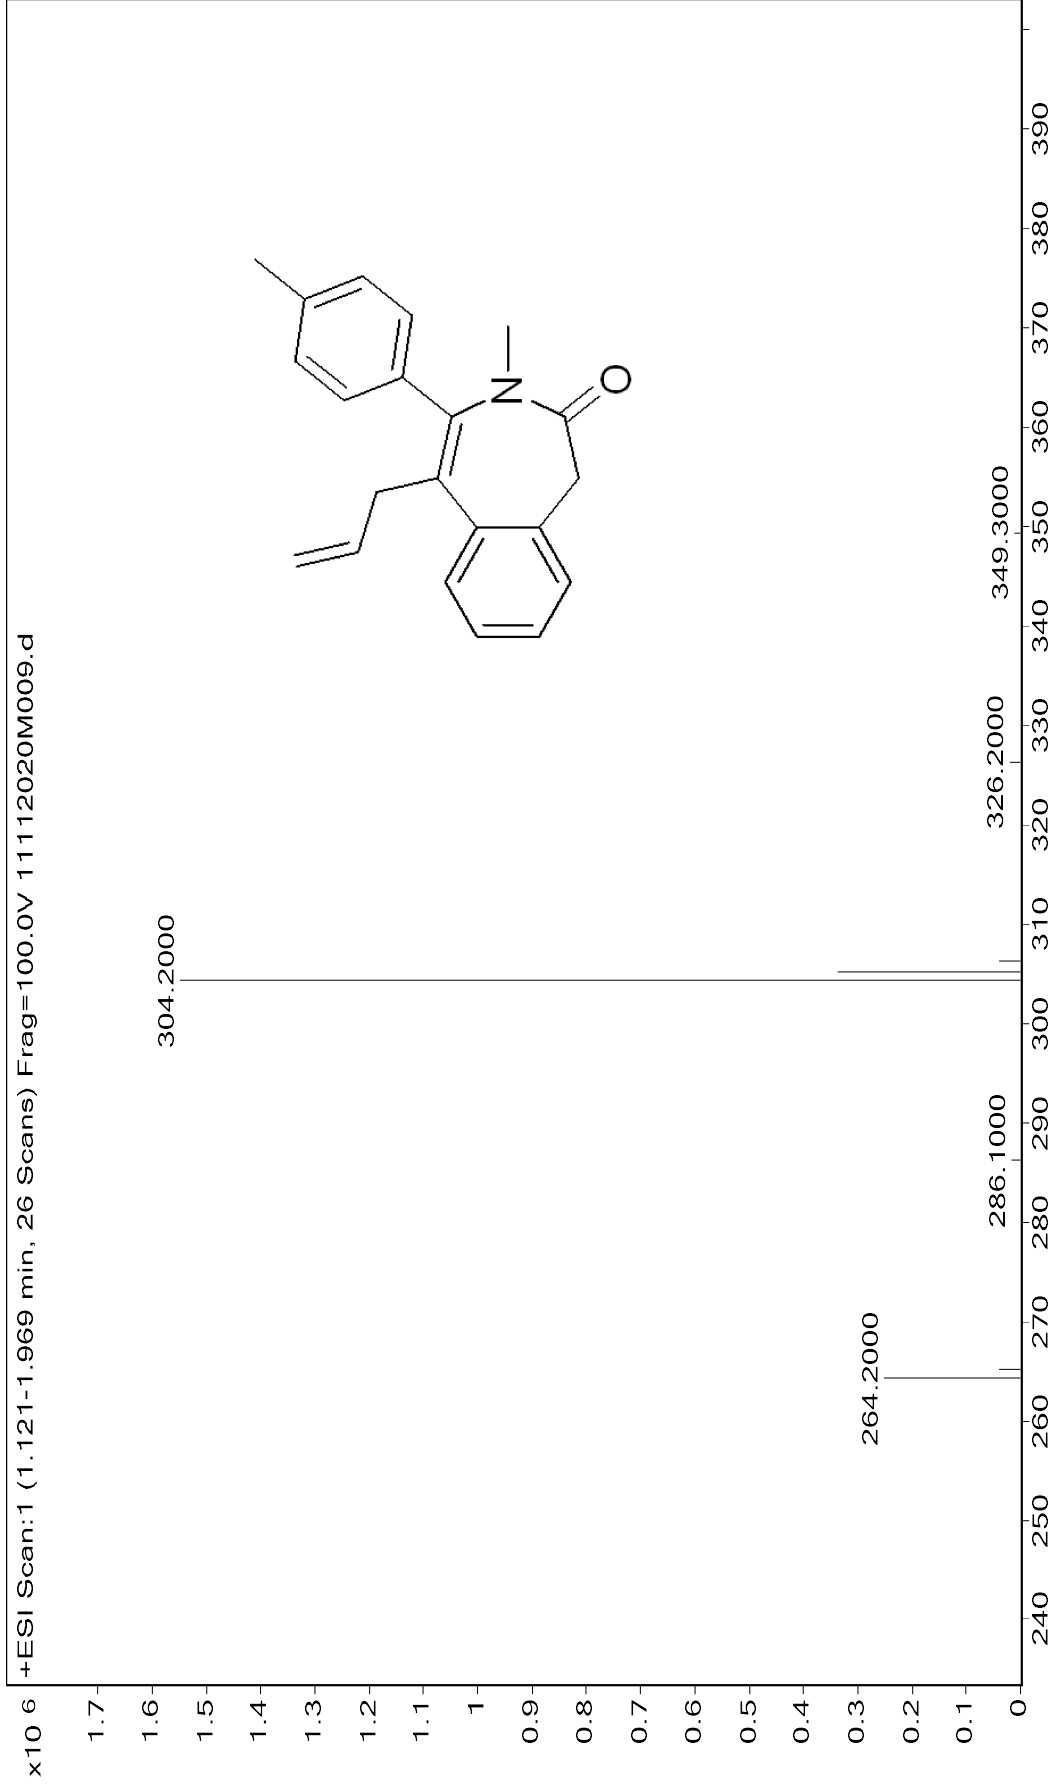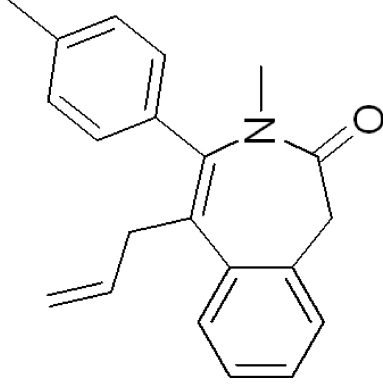

# Mass spectra of compound 4c

Sample Name ILS-BTG-MPA-NM-AL Vial 49 Instrument Name LCMS User Name  
Inj Vol 3 Inj Position MM1-SM.m Sample M20C037 IRM Calibration Status Not Applicable  
Data Filename 130320M012.d ACQ Method M20C037 Comment MM20C037 Acquired Time 3/13/2020 3:12:32 PM

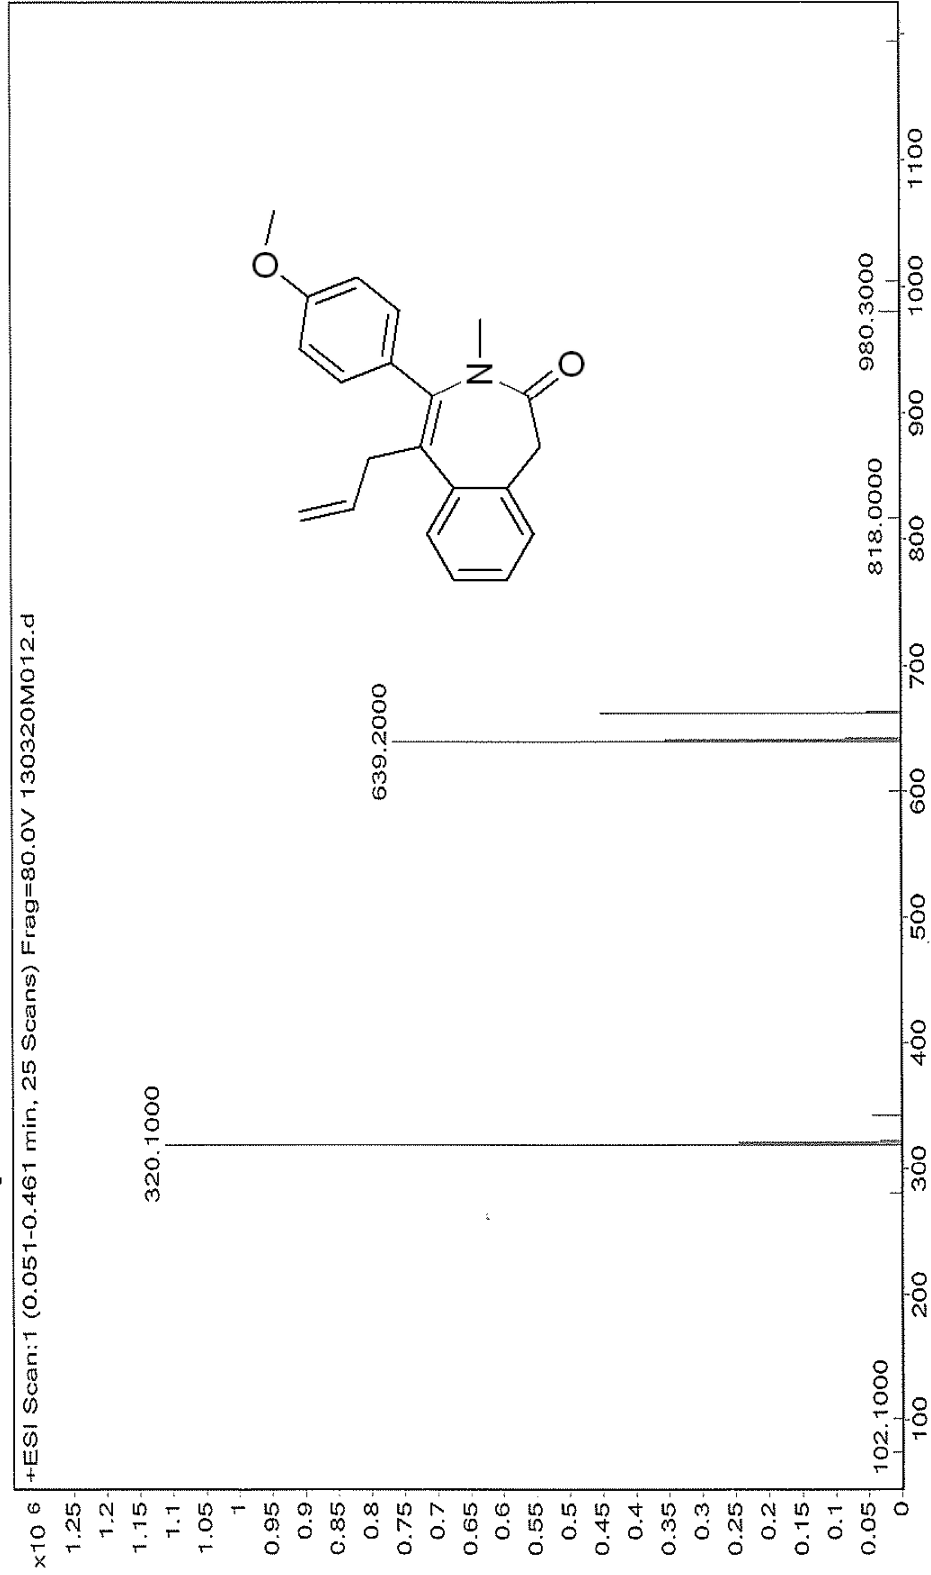

# Mass spectra of compound 4d

Sample Name ILS/BTG/FPA/NM/AL Vial 4 Instrument Name LCMS User Name  
Inj Vol 2 InjPosition ACQ Method MMI-SM.m Sample Type Comment MM201025 IRM Calibration Status Not Applicable  
Data Filename 15092020M007.d ACQ Method MMI-SM.m Comment MM201025 IRM Calibration Status Not Applicable  
9/15/2020 3:04:09 PM

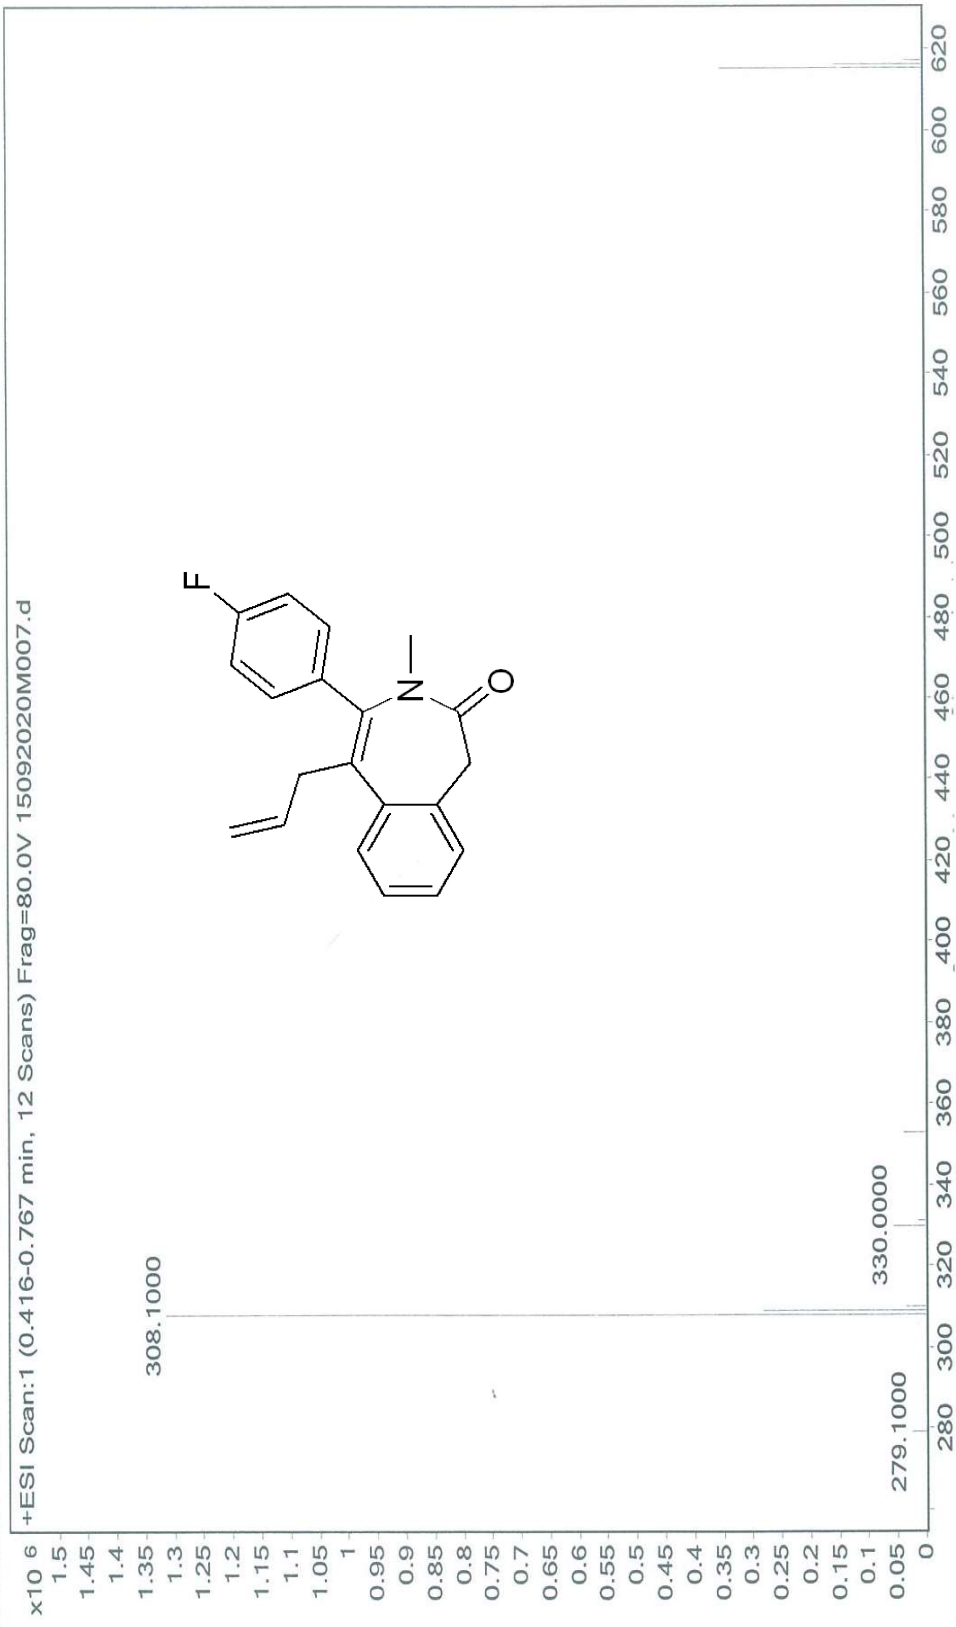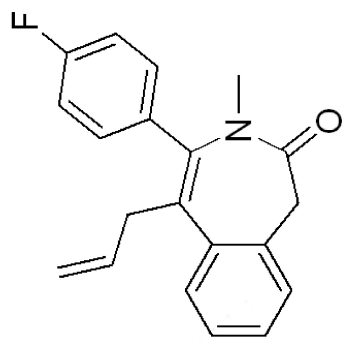

*Handwritten signature and date:*  
15/09/2020

# Mass spectra of compound 4ee

**Sample Name** ILS-BTG-DIFRA-NM-AL **Position** **User Name**  
**Inj Vol** 2 **InjPosition** **Instrument Name** **IRM Calibration Status** Not Applicable  
**Data Filename** 21102020M026.d **ACQ Method** **Sample Comment** **Acquired Time** 10/22/2020 4:20:27 PM  
**MMI-SM.m** **MM203040**

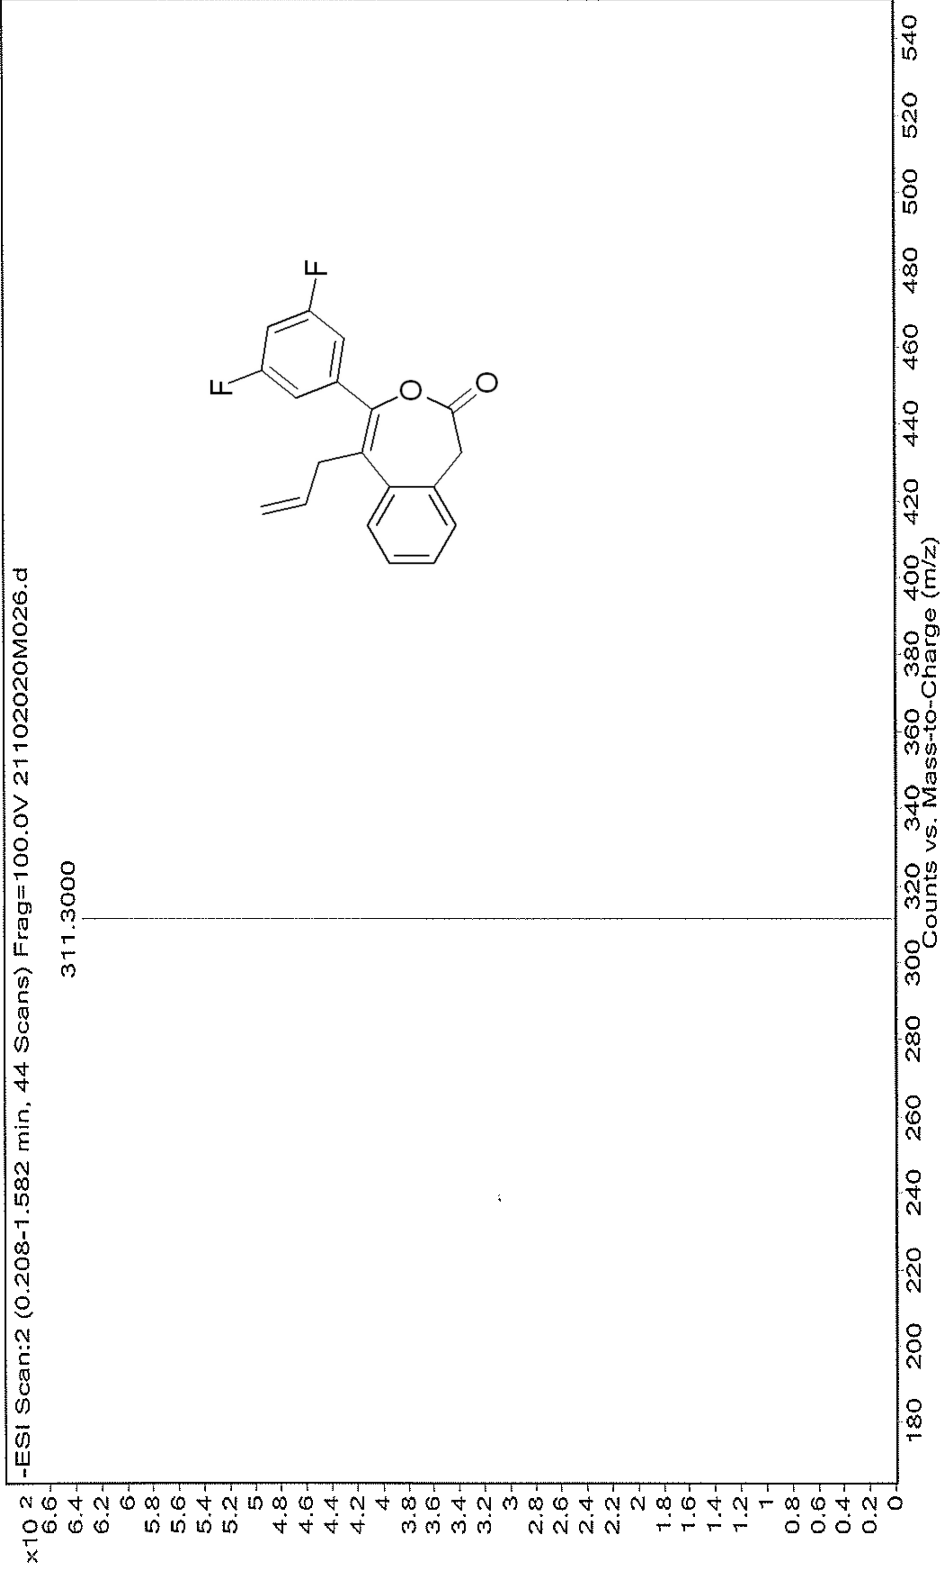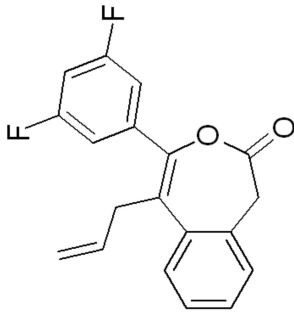



# Mass spectra of compound 4f

Sample Name ILS/BTG/MSPA/NM-AL Position Vial 22 Instrument Name LCMS User Name  
Inj Vol 2 Inj Position Inj Position Sample Type Sample IRM Calibration Status  
Data Filename 072102020M002.d ACQ Method MMI-SM.m Comment MM203011 Acquired Time  
10/7/2020 9:10:11 AM

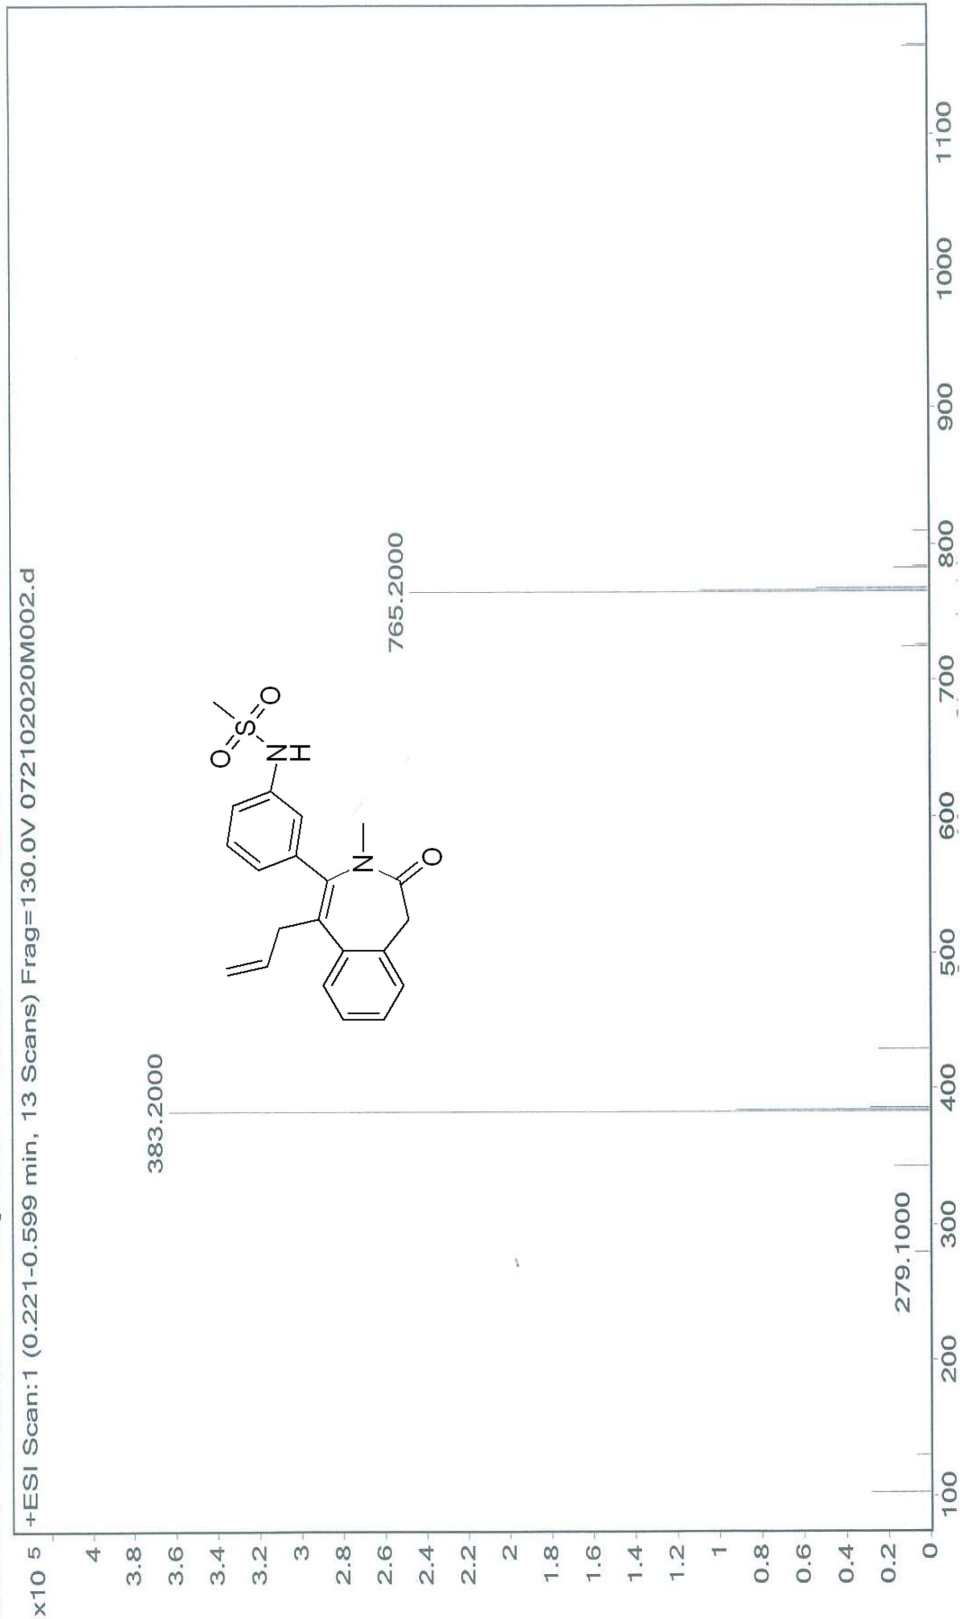

*Handwritten signature and date:*  
10/10/2020

# Mass spectra of compound 4g

Sample Name ILS/BTG/4MSPA/MM/AL      Vial 33      Instrument Name LCMS      User Name  
Inj Vol 2      InjPosition      SampleType Sample      IRM Calibration Status Not Applicable  
Data Filename 31102020M003.d      ACQ Method MMI-SM.m      Comment MA20J053      Acquired Time 10/31/2020 11:53:58 AM

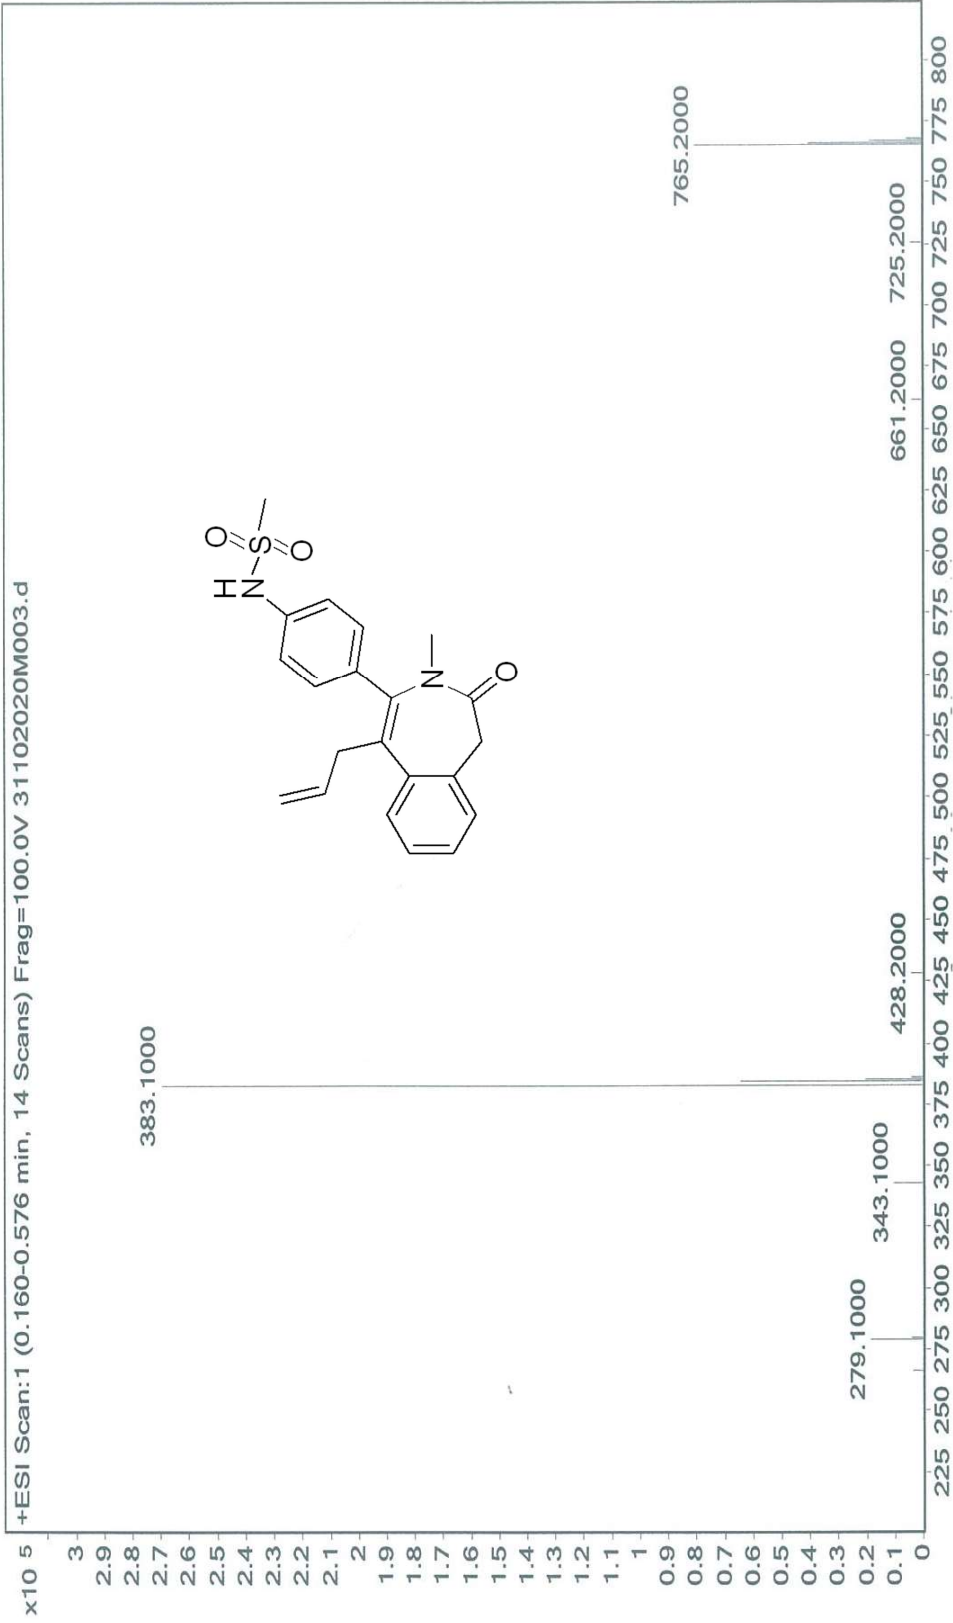

*Handwritten signature*  
11/13/2020

# Mass spectra of compound 4h

Sample Name ILS/BTG/BSPA/MM/AL Position Vial 8 User Name  
Inj Vol 2 InjPosition ACQ Method MMI-SM,m Instrument Name LCMS IRM Calibration Status  
Data Filename 24092020M013.d ACQ Method MMI-SM,m Comment MM201060 Acquired Time 9/24/2020 12:38:37 PM

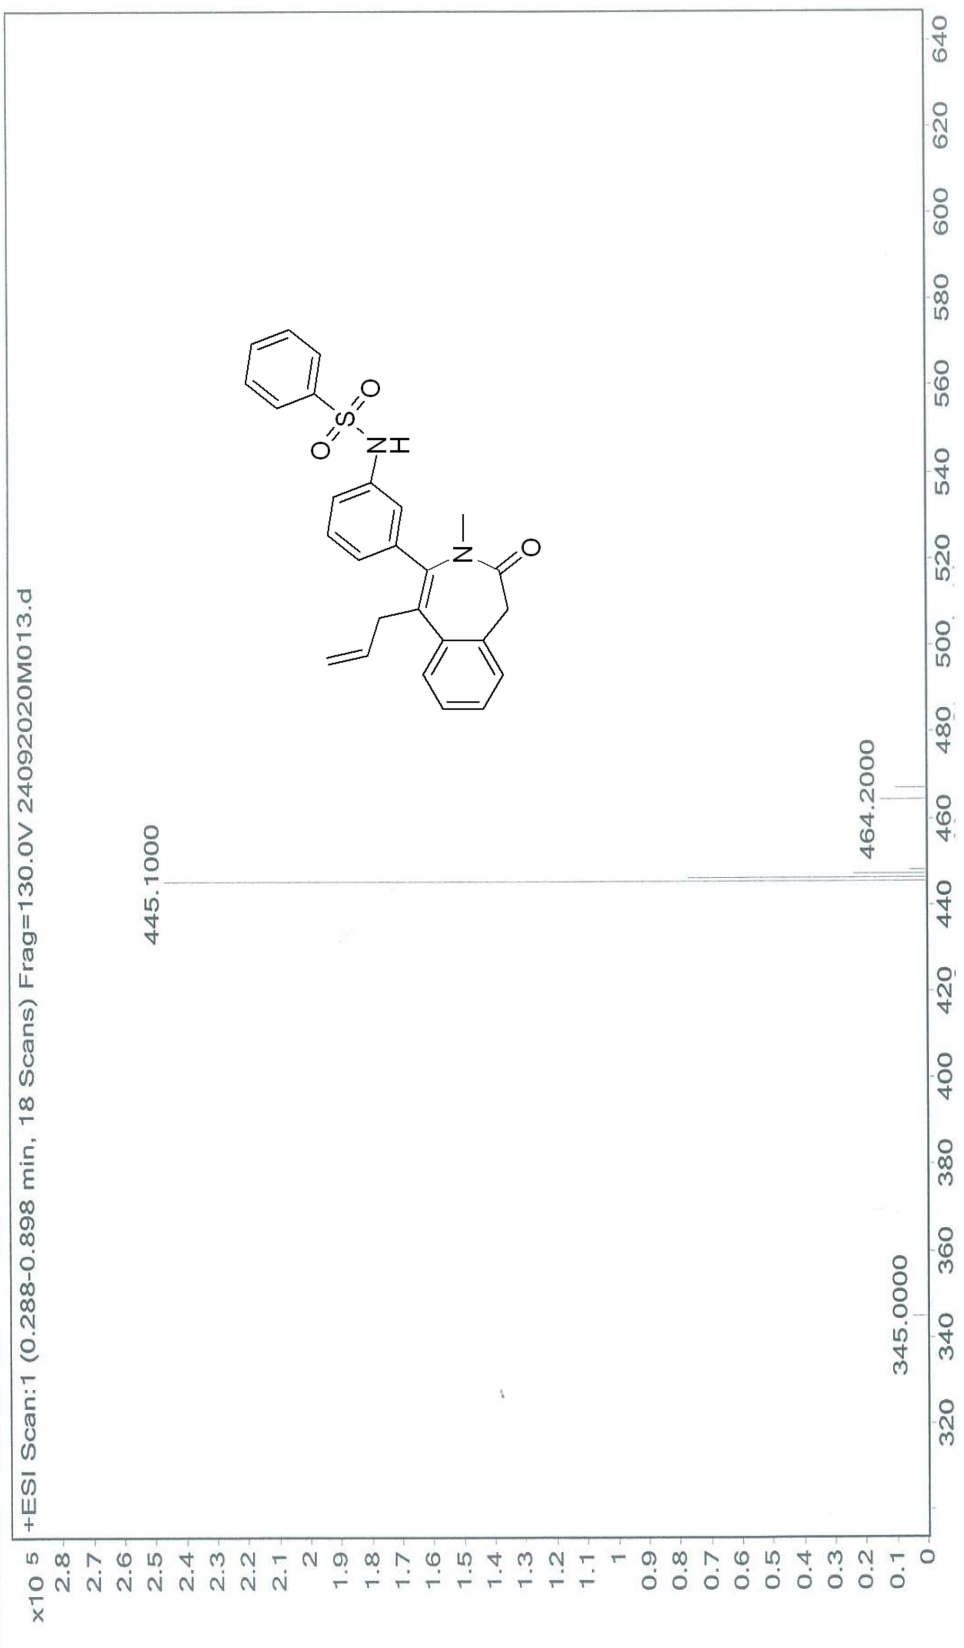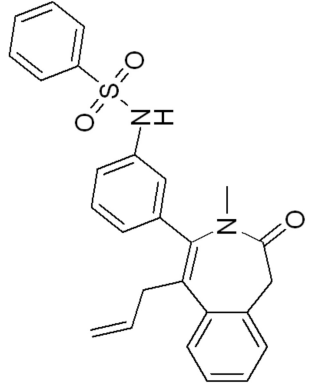

*Handwritten signature and date:*  
24/09/2020

# Mass spectra of compound 4i

Sample Name ILS-BTG-4BSPA-NM-AL Vial 5 Instrument Name LCMS User Name  
Inj Vol 2 InjPosition ACQ Method MMI-SM,m Comment MM20J026 IRM Calibration Status Not Applicable  
Data Filename 16102020M007.d +ESI Scan:1 (0.315-0.819 min, 17 Scans) Frag=130.0V 16102020M007.d Acquired Time 10/16/2020 2:25:20 PM

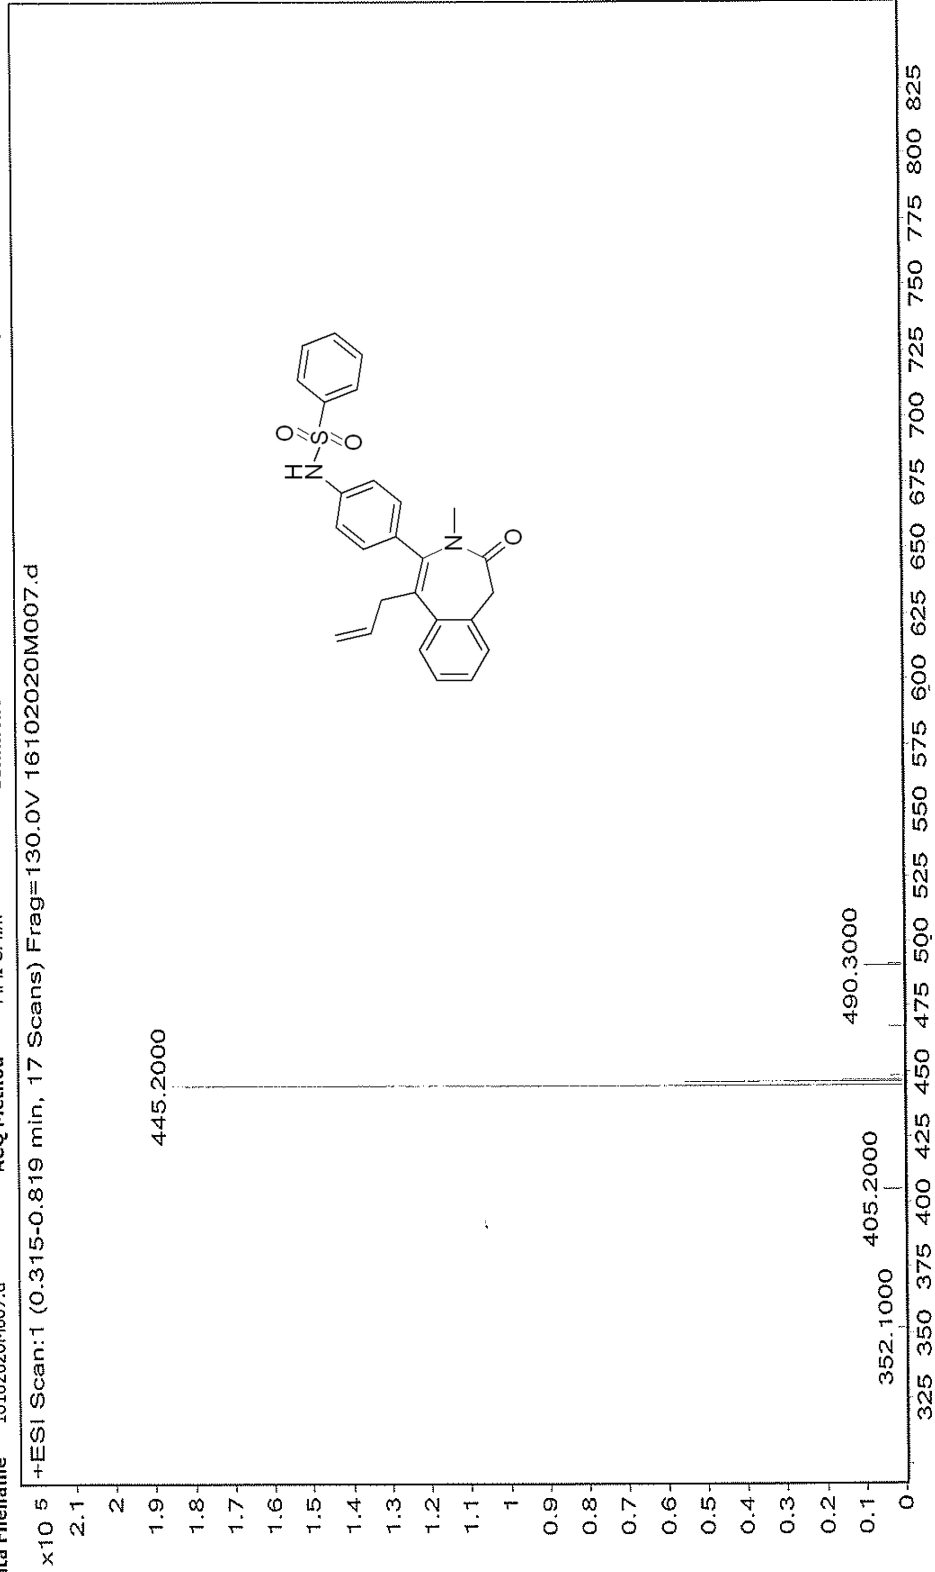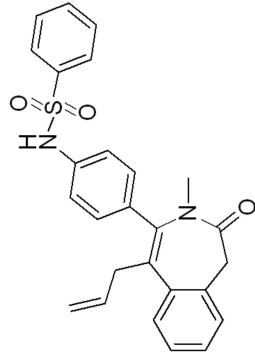

# Mass spectra of compound 4j

Sample Name ILS/BTG/TSPA/NM/JC Position Vial 16 Instrument Name LCMS User Name  
Inj Vol 2 InjPosition ACQ Method MMI-SM,m Comment MM201072 Sample MMS201072 IRM Calibration Status Not Applicable  
Data Filename 30092020M013.d ACQ Method MMI-SM,m Comment MM201072 Sample MMS201072 IRM Calibration Status Not Applicable  
+ESI Scan: 1 (0.862-1.867 min, 29 Scans) Frag=130.0V 30092020M013.d Acquired Time 9/30/2020 2:45:01 PM

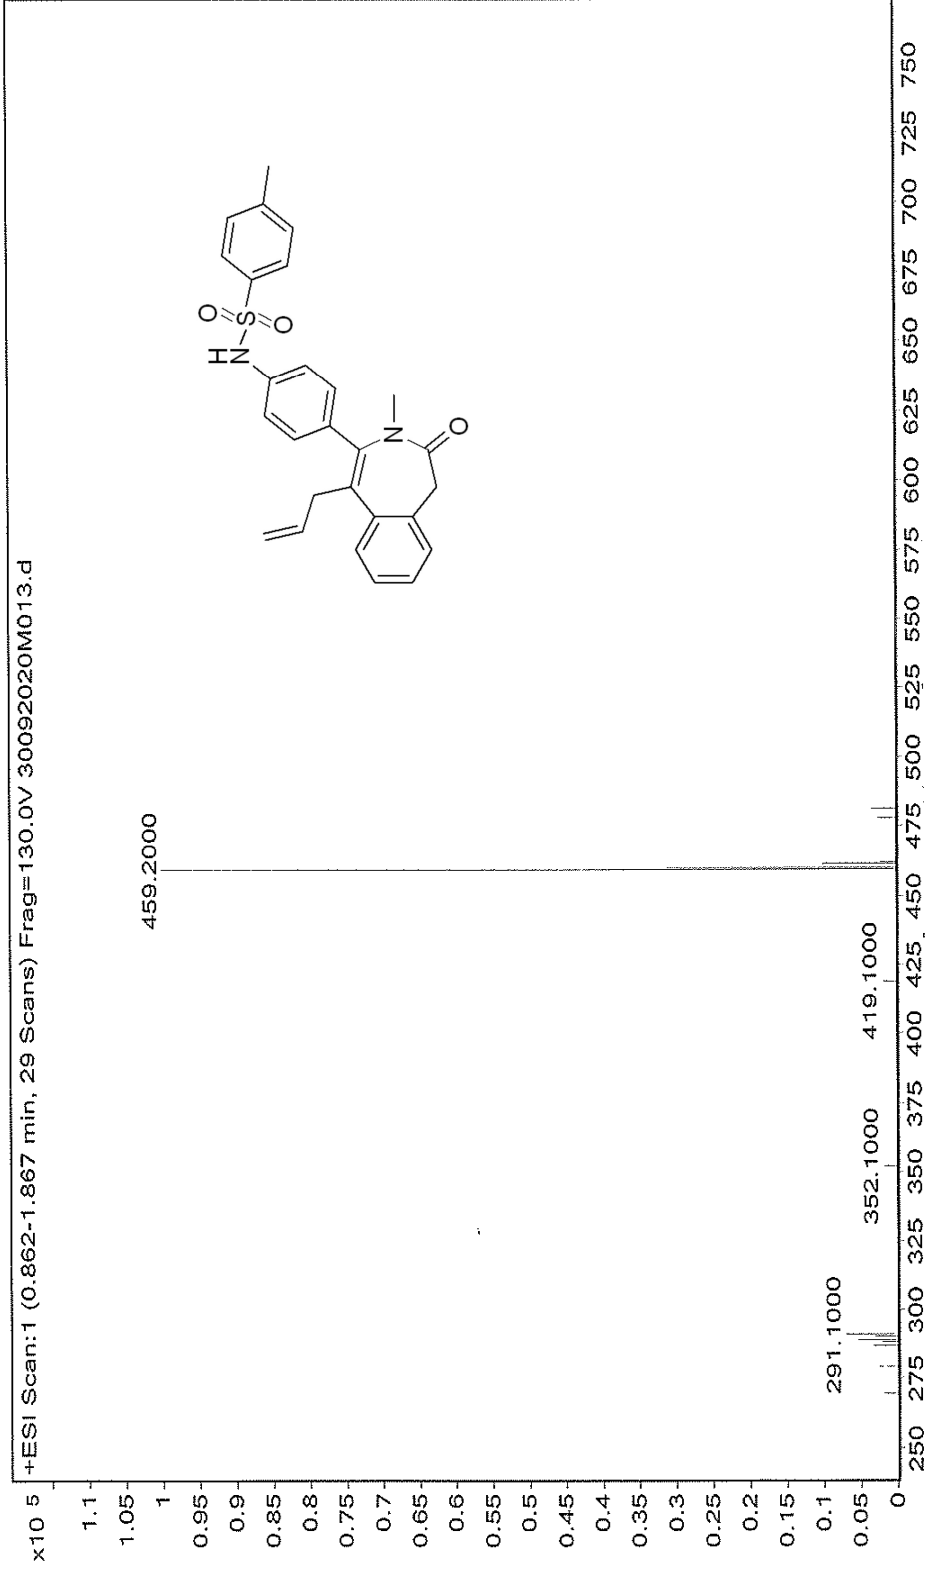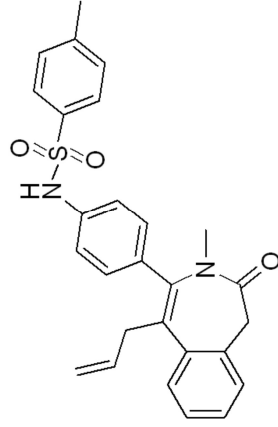

# Mass spectra of compound 4k

Sample Name ILS/BTG/ATSPA/MM/AL Vial 27 Instrument Name LCMS User Name  
Inj Vol 2 Inj Position ACQ Method MMI-SM.m Sample Type Sample IRM Calibration Status  
Data Filename 14102020M007.d Comment MM20J025 Acquired Time 10/14/2020 1:36:44 PM  
Not Applicable

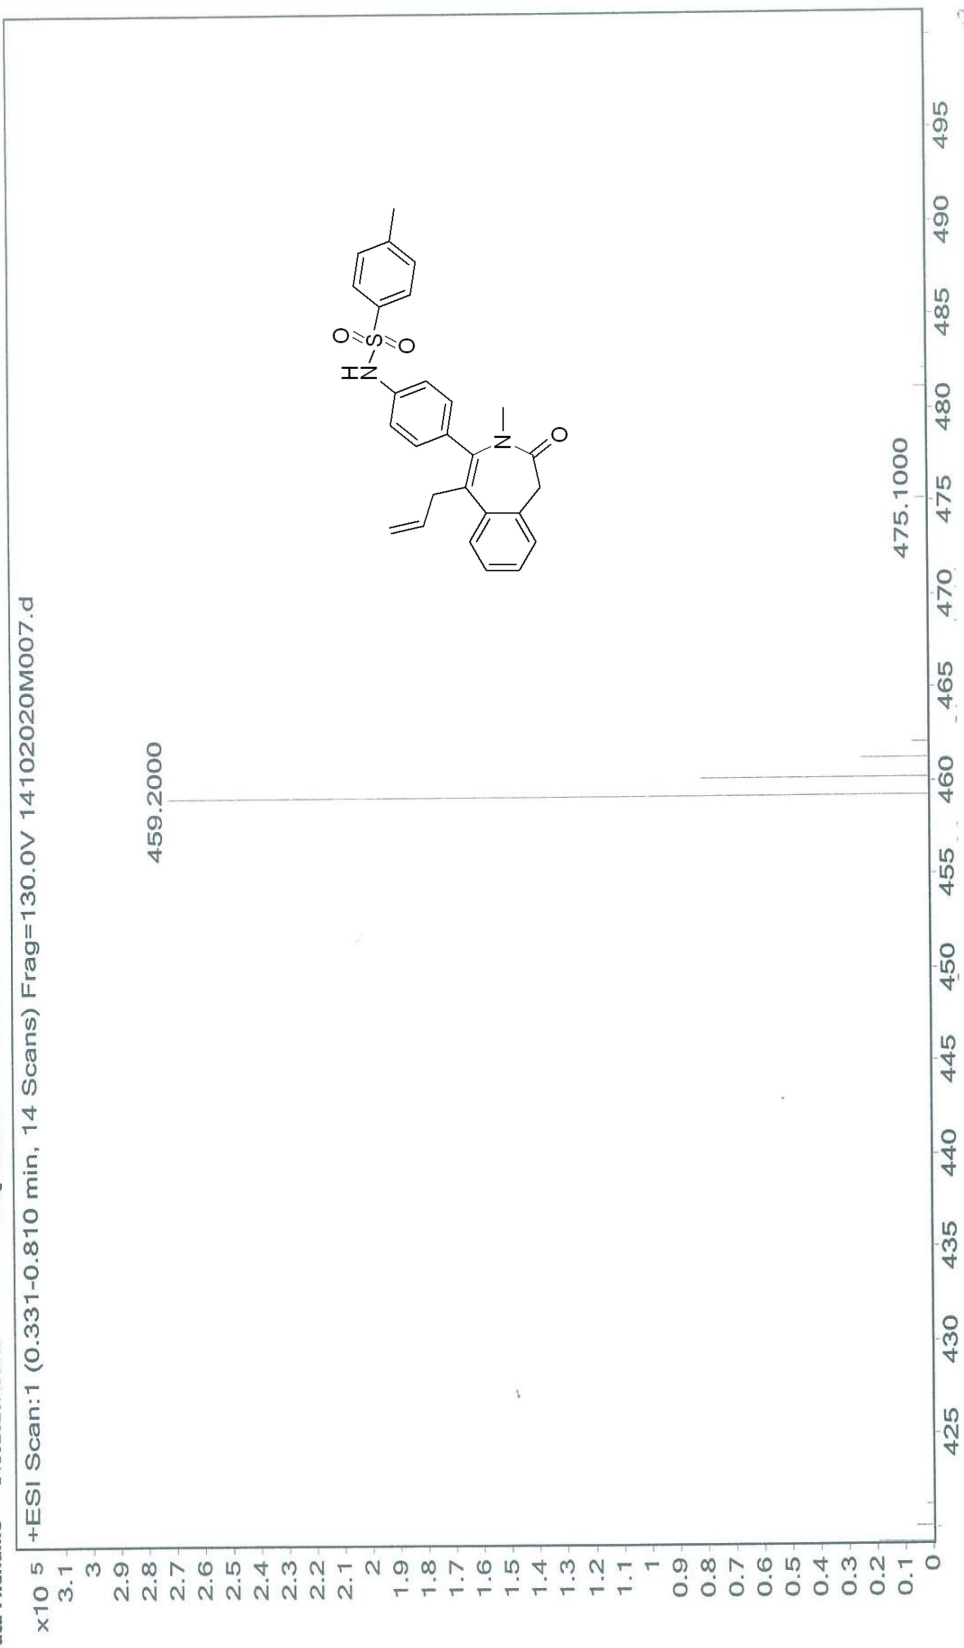

*Handwritten signature and date:*  
14/10/2020

# Mass spectra of compound 4I

*PSA-2A*  
Sample Name ILS/BTC/MSP/ANM-AL Vial 23 Instrument Name LCMS User Name  
Inj Vol 2 Inj Position ACQ Method MMI-SM,m Sample MM20J012 IRM Calibration Status Not Applicable  
Data Filename 072102020M003.d ACQ Method MMI-SM,m Comment MM20J012 Acquired Time 10/7/2020 9:13:06 AM

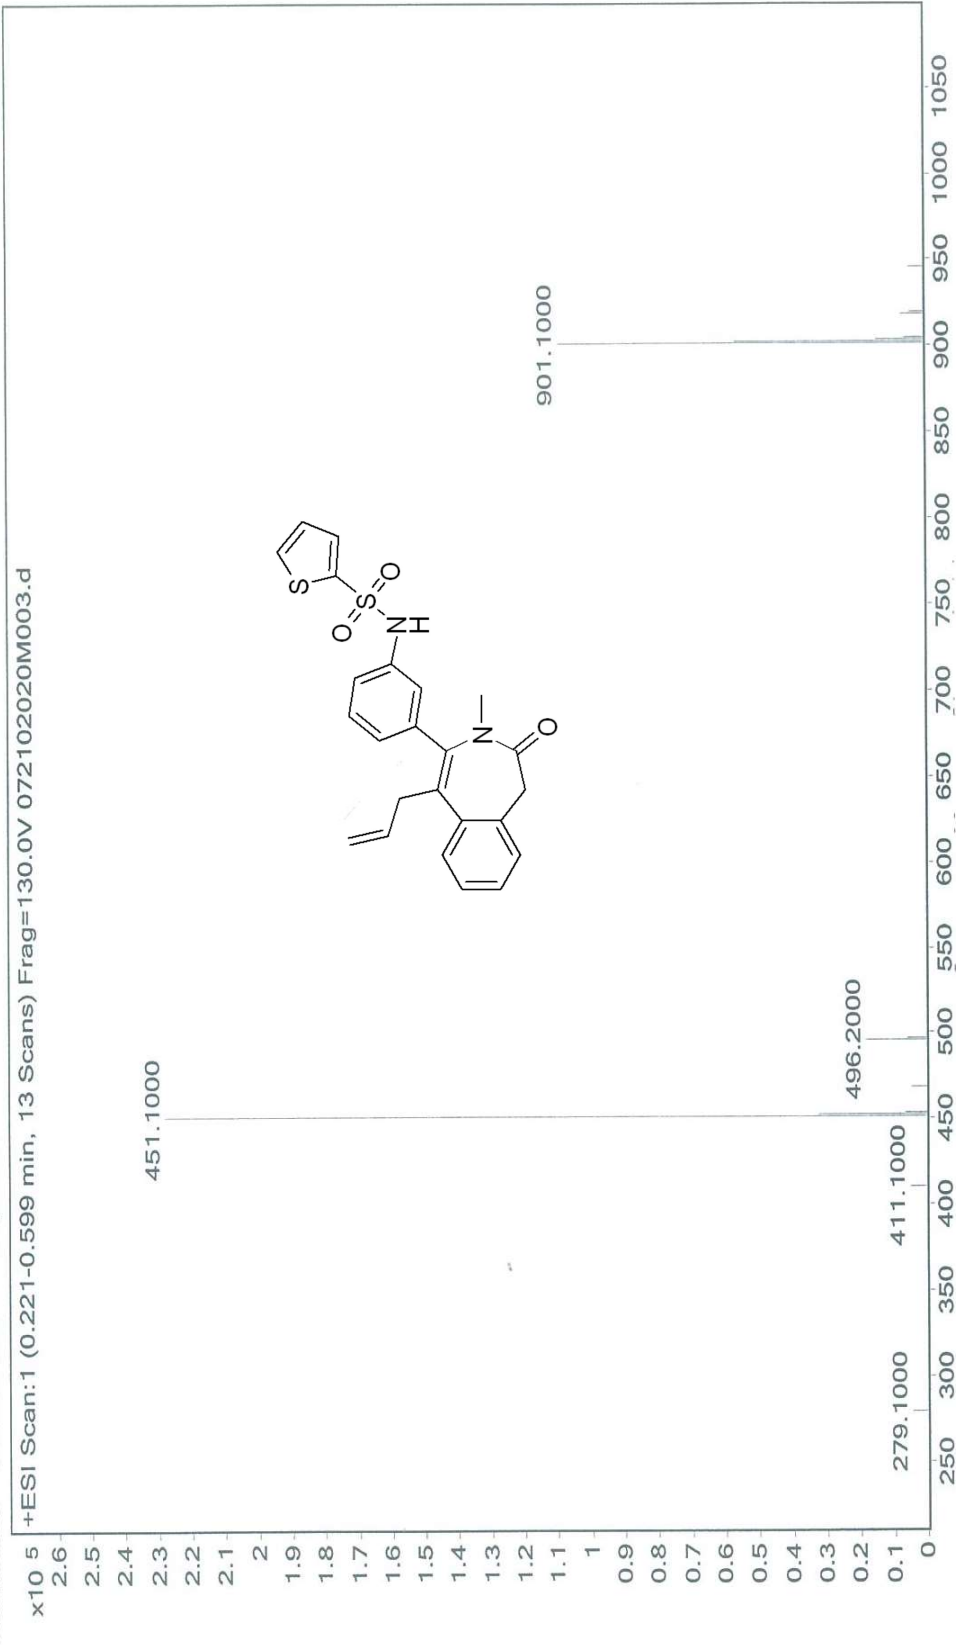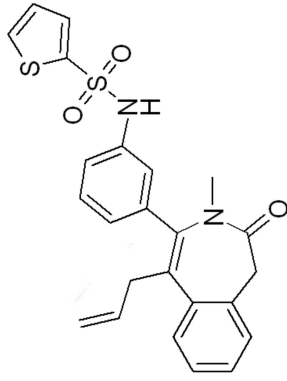

# Mass spectra of compound 4m

Sample Name ILS/BTG/4TPSPA-NM/AL      Position Vial 17      Instrument Name LCMS      User Name Not Applicable  
Inj Vol 2      InjPosition ACQ Method MML-SM.m      Sample Type MM20K009      IRM Calibration Status 11/4/2020 4:56:56 PM  
Data Filename 04112020M022.d      ACQ Method MML-SM.m      Comment

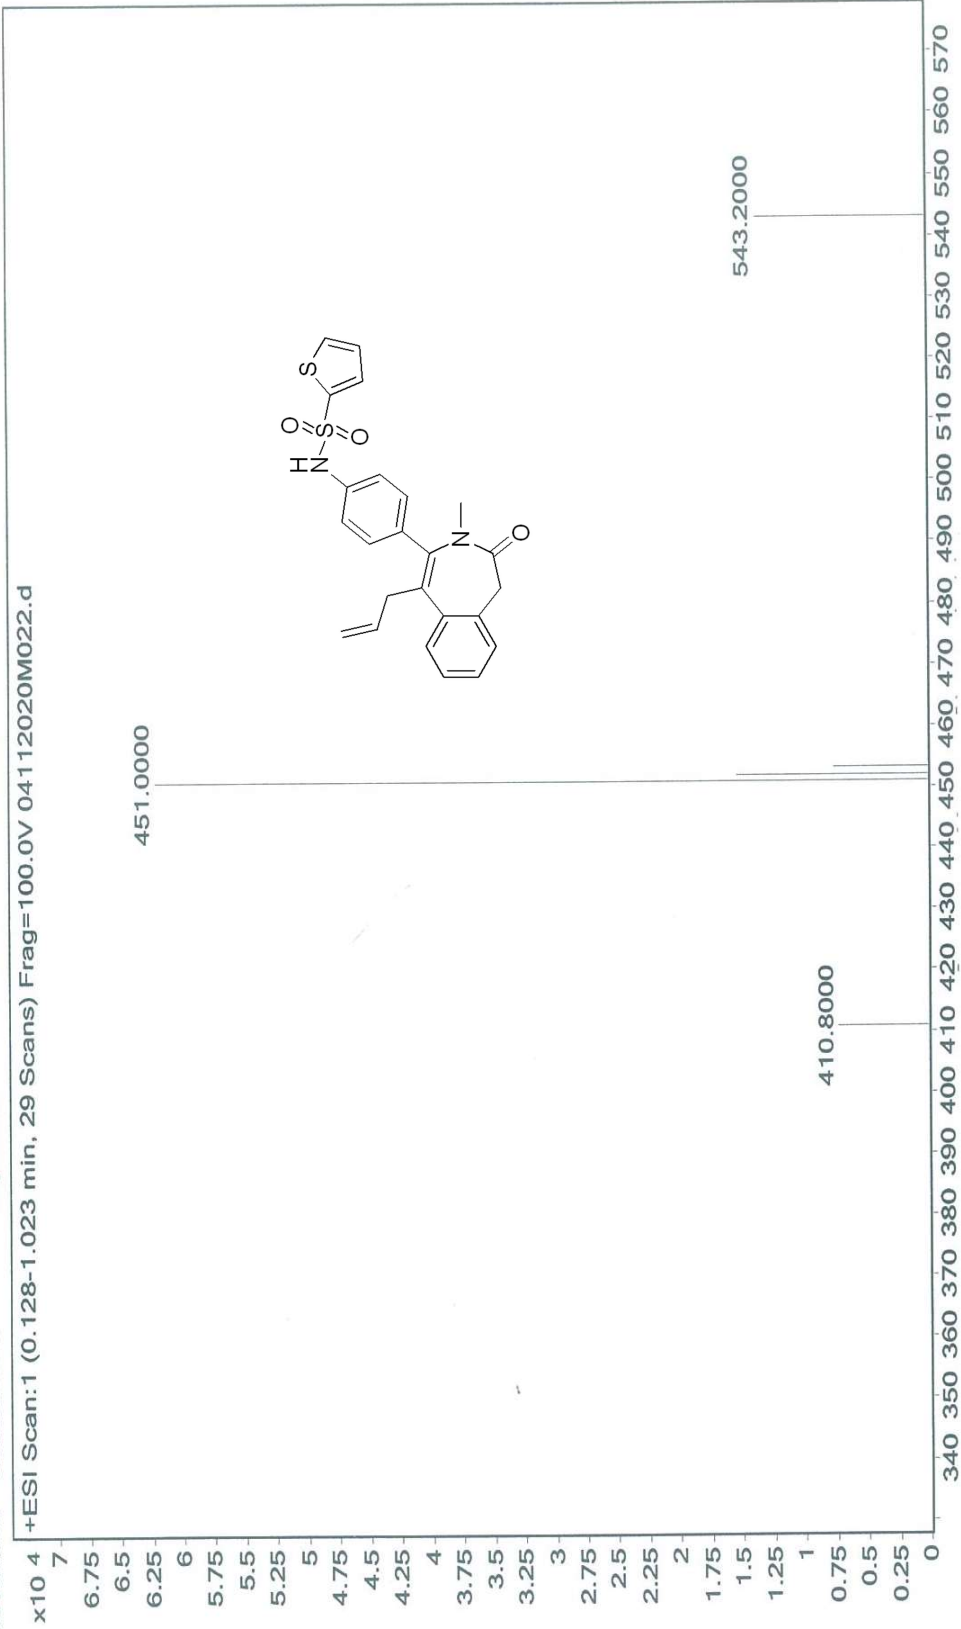

*Handwritten signature and date:*  
11/11/2020



# Mass spectra of compound 4n

Sample Name ILS/BTG/4MTPSA/NM/AL Vial 34 Instrument Name LCMS User Name  
Inj Vol 2 InjPosition Position Vial 34 Instrument Name LCMS Sample MA20J054 IRM Calibration Status Not Applicable  
Data Filename 31102020M004.d ACQ Method MMI-SM,m Comment MA20J054 Acquired Time 10/31/2020 11:56:54 AM

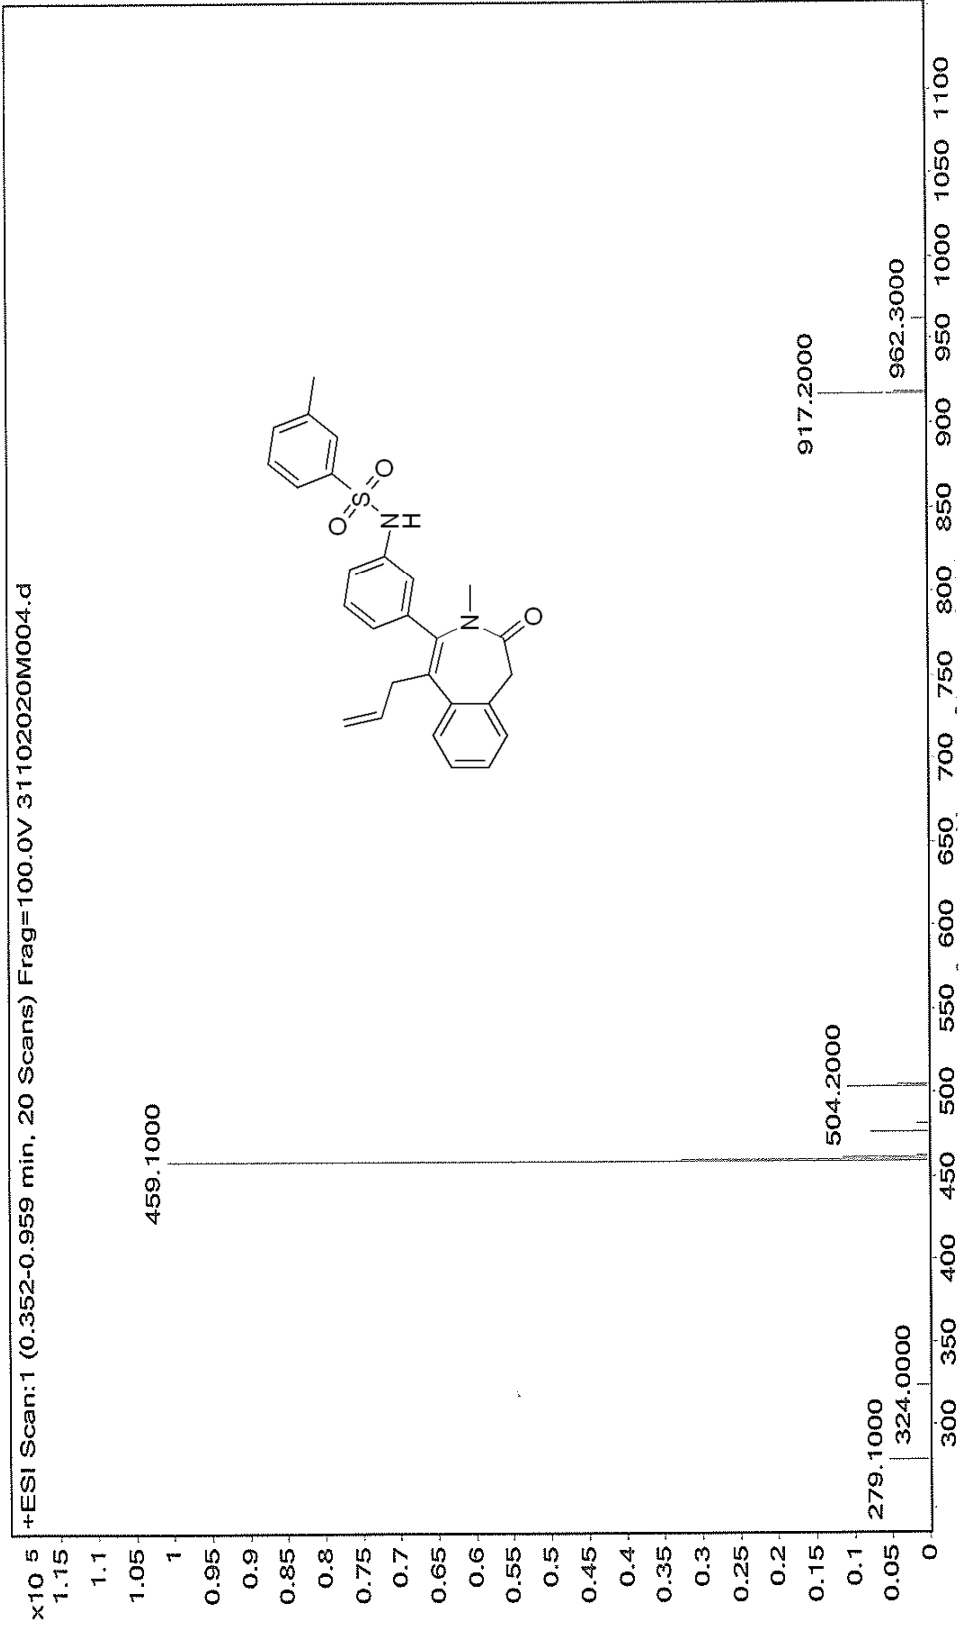

*Handwritten signature*  
5/10/2020

# Mass spectra of compound 5a

**Sample Name** ILS-BTG-7-Ph-Pd **Position** Vial 13 **User Name**  
**Inj Vol** 1 **InjPosition** **Instrument Name** LCMS **IRM Calibration Status** Not Applicable  
**Data Filename** 20072021M014.d **ACQ Method** MMI-SMI.m **Sample Comment** MM21G024 **Acquired Time** 7/20/2021 1:23:29 PM

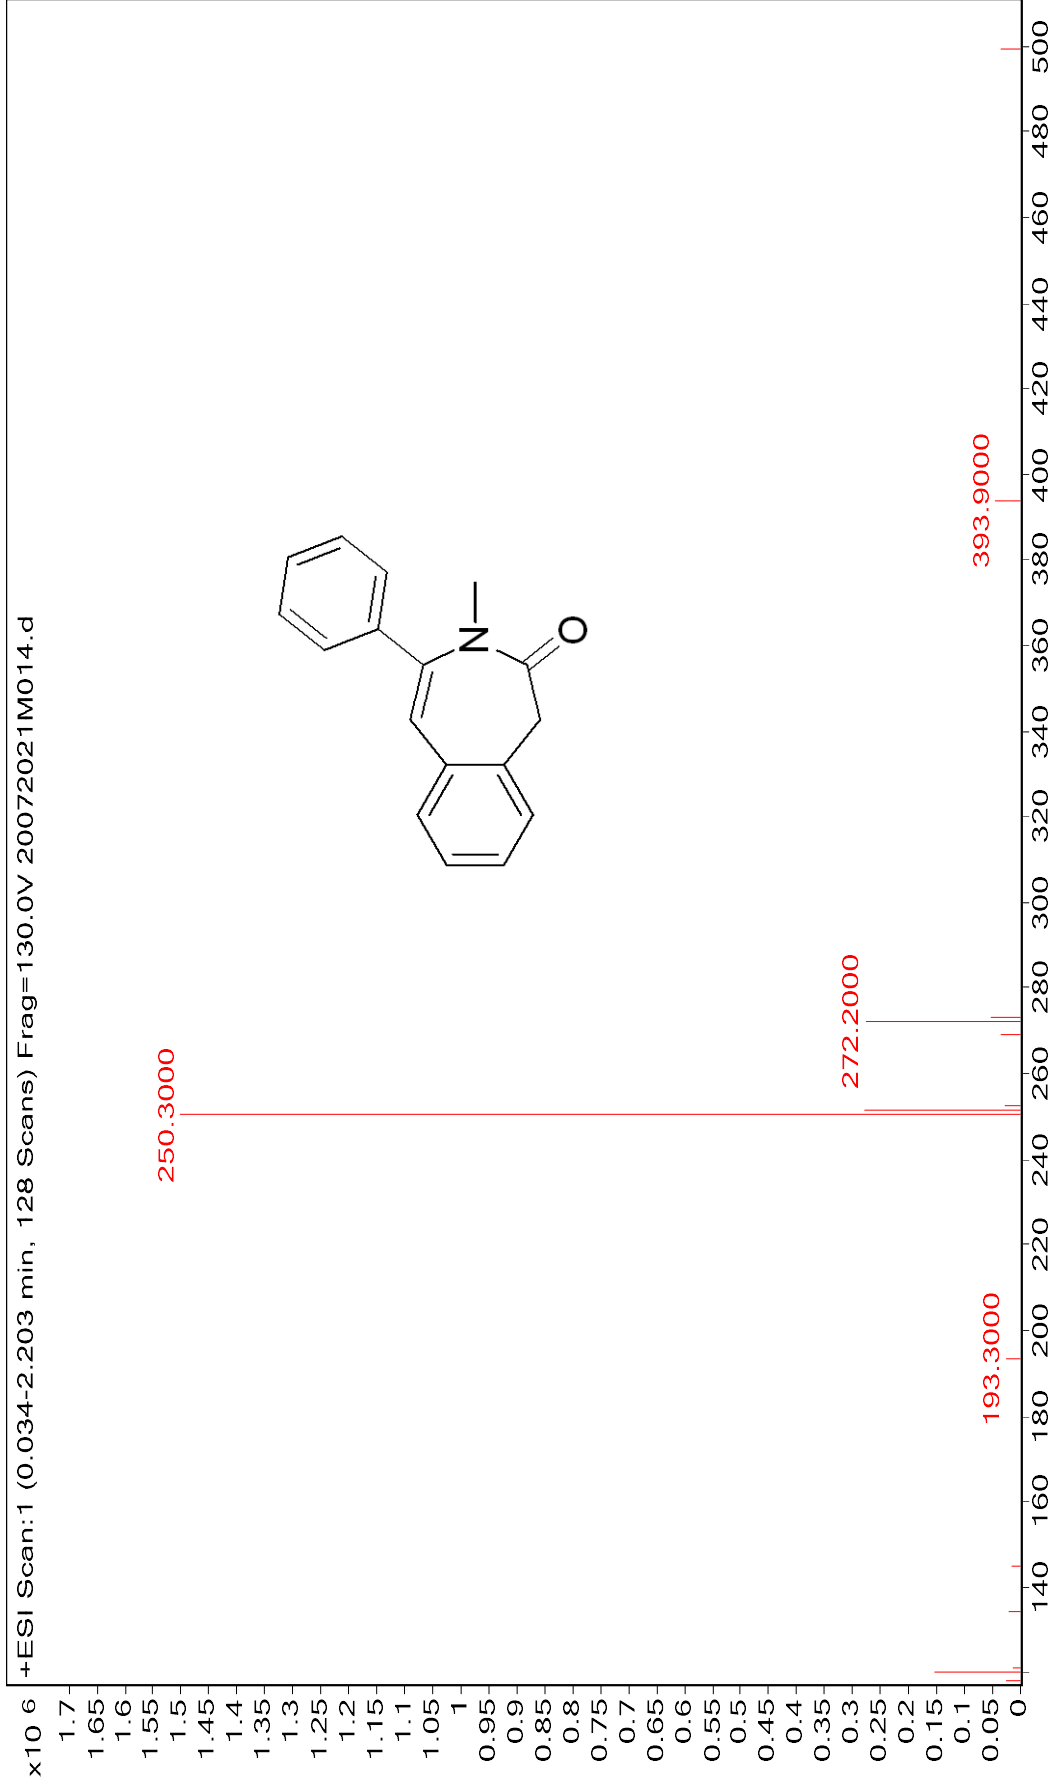

| SAMPLE INFORMATION |                           |                     |              |
|--------------------|---------------------------|---------------------|--------------|
| Sample Name:       | ILS-BTG-3-Eth-MS          | Acquired By:        | System       |
| Sample Type:       | Unknown CM1911045         | Sample Set Name:    | 27082019_07  |
| Vial:              | 31                        | Acq. Method Set:    | API ABT_M    |
| Injection #:       | 1                         | Processing Method:  | ILS PRO      |
| Injection Volume:  | 5.00 ul                   | Channel Name:       | 215.0nm      |
| Run Time:          | 35.0 Minutes              | Proc. Chnl. Descr.: | PDA 215.0 nm |
| Date Acquired:     | 8/27/2019 10:48:57 PM IST |                     |              |
| Date Processed:    | 8/28/2019 10:12:05 AM IST |                     |              |

Column :X-BRIDGE C18 150\*4.6mm 5µm  
 Mobile phase : A) 5mM NH4OAC in water B) ACN  
 T/%B: 0/5,20/90,30/90,31/5,35/5  
 Flow:1.0ml/min,Diluent: ACN:H2O(80:20)

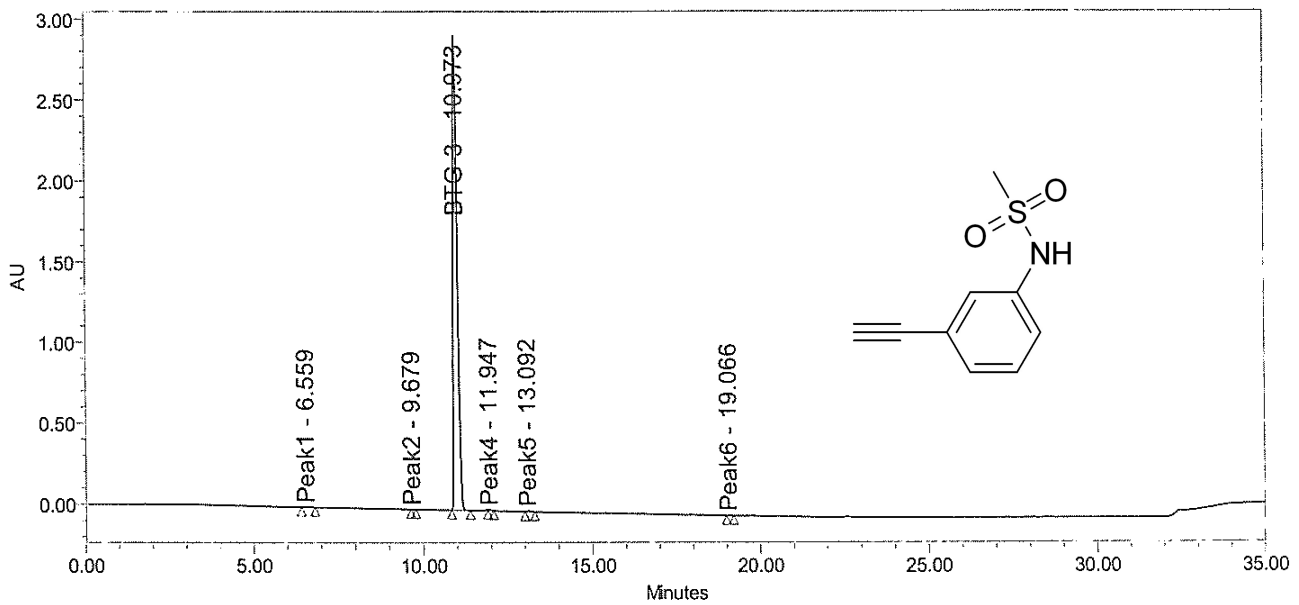

| Peak Name | RT     | Height  | Area     | % Area | RT Ratio |
|-----------|--------|---------|----------|--------|----------|
| 1 Peak1   | 6.559  | 849     | 13227    | 0.05   | 0.60     |
| 2 Peak2   | 9.679  | 490     | 2884     | 0.01   | 0.88     |
| 3 BTG-3   | 10.973 | 2966238 | 24622182 | 99.68  | 1.00     |
| 4 Peak4   | 11.947 | 2413    | 13539    | 0.05   | 1.09     |
| 5 Peak5   | 13.092 | 6005    | 42638    | 0.17   | 1.19     |

**SAMPLE INFORMATION**

|                   |                           |                     |              |
|-------------------|---------------------------|---------------------|--------------|
| Sample Name:      | ILS-BTG-4ETH-MS           | Acquired By:        | System       |
| A.R.Number:       | CA19J004                  | Sample Set Name:    | 03102019_04  |
| Vial:             | 110                       | Acq. Method Set:    | ILS_RS_MET   |
| Injection #:      | 1                         | Processing Method:  | ILS PRO      |
| Injection Volume: | 5.00 ul                   | Channel Name:       | 220.0nm      |
| Run Time:         | 35.0 Minutes              | Proc. Chnl. Descr.: | PDA 220.0 nm |
| Date Acquired:    | 10/3/2019 9:46:11 PM IST  |                     |              |
| Date Processed:   | 10/4/2019 11:04:41 AM IST |                     |              |

Column: X-BRIDGE C-18 150\*4.6mm 5µm  
 Mobile phase: A) 5mMNH4OAC in water B) ACN  
 T/%B: 0/20, 20/90,30/90, 31/20, 35/20  
 Flow: 1.0ml/min, Diluent: ACN:H2O (80:20)

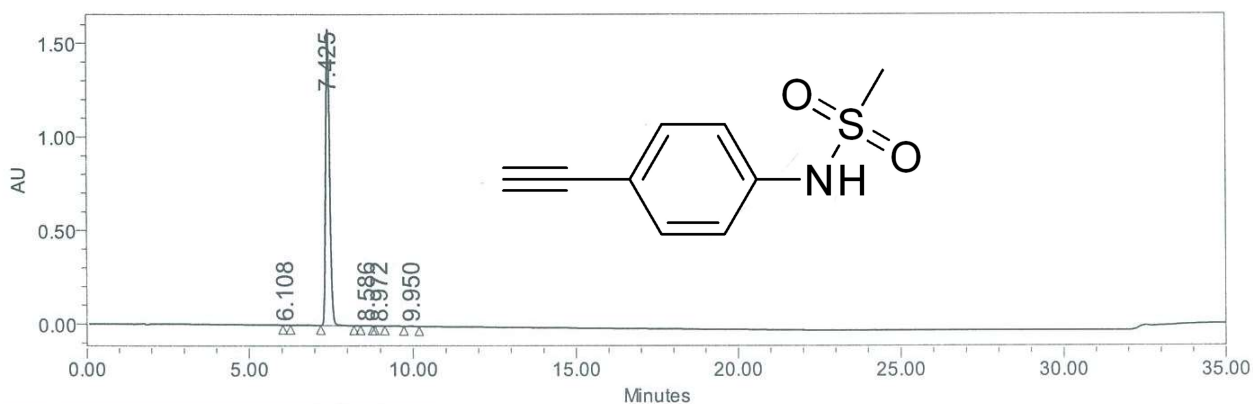

|   | RT    | Height  | Area     | % Area |
|---|-------|---------|----------|--------|
| 1 | 6.108 | 226     | 1576     | 0.01   |
| 2 | 7.425 | 1591474 | 13343376 | 99.71  |
| 3 | 8.586 | 1389    | 11715    | 0.09   |
| 4 | 8.972 | 520     | 4172     | 0.03   |
| 5 | 9.950 | 2422    | 21142    | 0.16   |

Analysed by

*Amey*  
04/10/19

Checked by

*by*  
04/10/19

**SAMPLE INFORMATION**

|                   |                           |                     |                                 |
|-------------------|---------------------------|---------------------|---------------------------------|
| Sample Name:      | ILS-BTG-3-Eth-BS          | Acquired By:        | System                          |
| A.R.Number:       | CM19H049                  | Sample Set Name:    | 28082019_02                     |
| Vial:             | 54                        | Acq. Method Set:    | API SIP_MET                     |
| Injection #:      | 1                         | Processing Method:  | ILS PRO                         |
| Injection Volume: | 5.00 ul                   | Channel Name:       | PDA Max Plot 190.0 - 800.0      |
| Run Time:         | 40.0 Minutes              | Proc. Chnl. Descr.: | PDA MaxPlot (190.0 nm to 800.0) |
| Date Acquired:    | 8/28/2019 11:05:36 PM IST |                     |                                 |
| Date Processed:   | 8/29/2019 9:52:15 AM IST  |                     |                                 |

Column: X-Bridge C18 150\*4.6mm 5µm  
 Mobile phase: A) 0.1% TFA in water B) ACN  
 T/%B: 0/5,25/90,35/90,36/5,40/5  
 Flow: 1.0ml/min, Diluent: ACN :H2O (80:20)

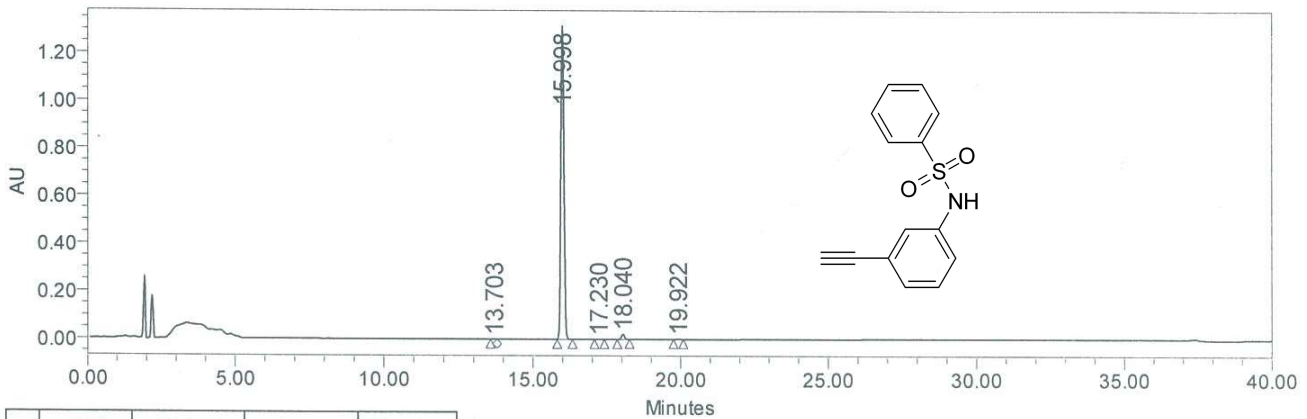

|   | RT     | Height  | Area    | % Area |
|---|--------|---------|---------|--------|
| 1 | 13.703 | 255     | 1810    | 0.02   |
| 2 | 15.998 | 1312153 | 9550815 | 98.11  |
| 3 | 17.230 | 464     | 3925    | 0.04   |
| 4 | 18.040 | 22027   | 164300  | 1.69   |
| 5 | 19.922 | 2290    | 14211   | 0.15   |

Analysed by

*homy*  
29/08/19

Checked by

*by*  
29/08/19

**SAMPLE INFORMATION**

|                   |                          |                     |              |
|-------------------|--------------------------|---------------------|--------------|
| Sample Name:      | ILS-BTG-4-ETH-BS         | Acquired By:        | System       |
| A.R.Number:       | CM191048                 | Sample Set Name:    | 30092019_03  |
| Vial:             | 65                       | Acq. Method Set:    | API FRZ_MET  |
| Injection #:      | 1                        | Processing Method:  | ILS PRO      |
| Injection Volume: | 5.00 ul                  | Channel Name:       | 215.0nm      |
| Run Time:         | 45.0 Minutes             | Proc. Chnl. Descr.: | PDA 215.0 nm |
| Date Acquired:    | 10/1/2019 2:10:06 AM IST |                     |              |
| Date Processed:   | 10/1/2019 9:56:01 AM IST |                     |              |

Column: Eclipse plus C18 250\*4.6mm 5µm  
 Mobile phase: A) 5mMNH4OAC in water B) ACN  
 T/%B: 0/20, 35/90,40/90, 41/20, 45/20  
 Flow: 1.0ml/min, Diluent: ACN:H2O (80:20)

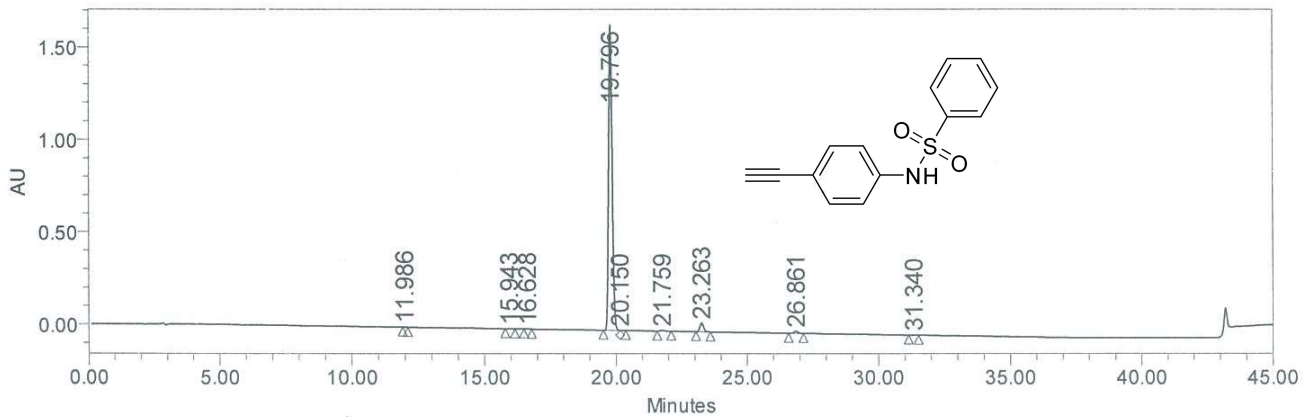

|   | RT     | Height  | Area     | % Area |
|---|--------|---------|----------|--------|
| 1 | 11.986 | 188     | 1271     | 0.01   |
| 2 | 15.943 | 698     | 6466     | 0.04   |
| 3 | 16.628 | 504     | 4321     | 0.03   |
| 4 | 19.796 | 1654638 | 16041439 | 96.12  |
| 5 | 20.150 | 985     | 8064     | 0.05   |
| 6 | 21.759 | 3541    | 39786    | 0.24   |
| 7 | 23.263 | 47690   | 467574   | 2.80   |
| 8 | 26.861 | 12235   | 116545   | 0.70   |
| 9 | 31.340 | 370     | 4321     | 0.03   |

Analysed by

*Ramesh*  
01/10/19

Checked by

*dep*  
01/10/19

**SAMPLE INFORMATION**

|                   |                           |                     |              |
|-------------------|---------------------------|---------------------|--------------|
| Sample Name:      | ILS-BTG-3-Eth-TS          | Acquired By:        | System       |
| Sample Type:      | Unknown (M191046)         | Sample Set Name:    | 27082019_07  |
| Vial:             | 32                        | Acq. Method Set:    | API ABT_M    |
| Injection #:      | 1                         | Processing Method:  | ILS PRO      |
| Injection Volume: | 5.00 ul                   | Channel Name:       | 210.0nm      |
| Run Time:         | 35.0 Minutes              | Proc. Chnl. Descr.: | PDA 210.0 nm |
| Date Acquired:    | 8/27/2019 11:25:27 PM IST |                     |              |
| Date Processed:   | 8/28/2019 10:13:17 AM IST |                     |              |

Column :X-BRIDGE C18 150\*4.6mm 5µm  
 Mobile phase : A) 5mM NH4OAc in water B) ACN  
 T/%B: 0/5,20/90,30/90,31/5,35/5  
 Flow:1.0ml/min,Diluent: ACN:H2O(80:20)

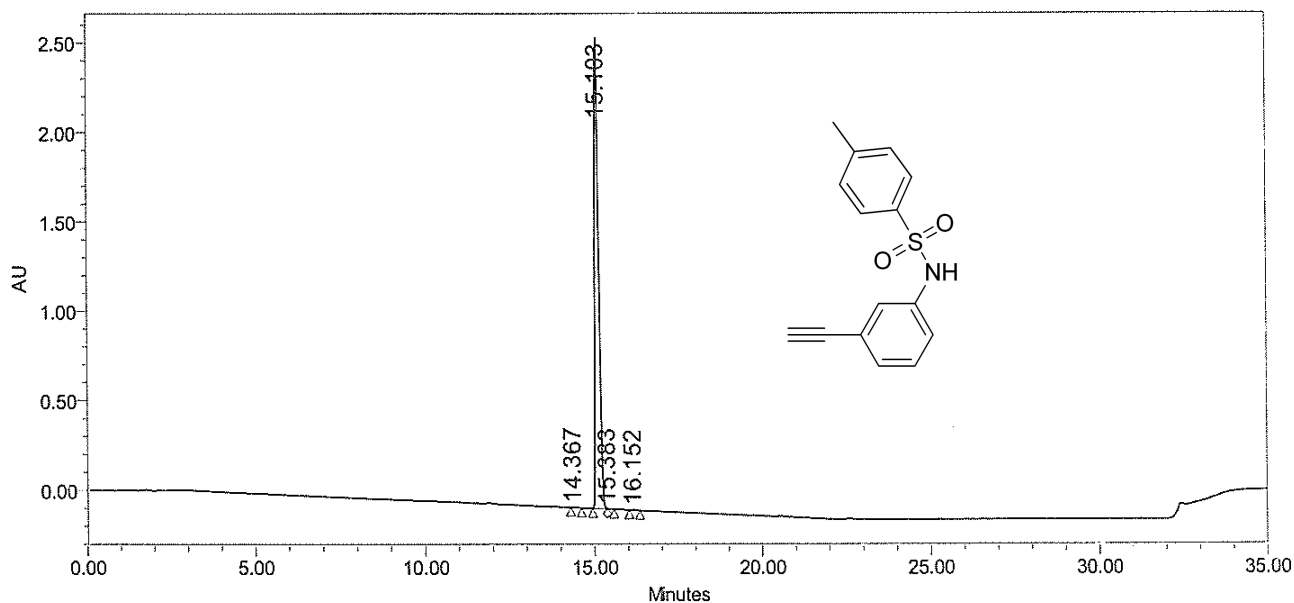

|   | RT     | Height  | Area     | % Area |
|---|--------|---------|----------|--------|
| 1 | 14.367 | 1310    | 18384    | 0.09   |
| 2 | 15.103 | 2647215 | 21220438 | 99.69  |
| 3 | 15.383 | 2490    | 15062    | 0.07   |
| 4 | 16.152 | 4293    | 32760    | 0.15   |



**SAMPLE INFORMATION**

|                   |                           |                     |                                 |
|-------------------|---------------------------|---------------------|---------------------------------|
| Sample Name:      | ILS-BTG-4-Eth-TS          | Acquired By:        | System                          |
| A.R.Number:       | CM19H048                  | Sample Set Name:    | 28082019_02                     |
| Vial:             | 53                        | Acq. Method Set:    | API SIP_MET                     |
| Injection #:      | 1                         | Processing Method:  | ILS PRO                         |
| Injection Volume: | 5.00 ul                   | Channel Name:       | PDA Max Plot 190.0 - 800.0      |
| Run Time:         | 40.0 Minutes              | Proc. Chnl. Descr.: | PDA MaxPlot (190.0 nm to 800.0) |
| Date Acquired:    | 8/28/2019 10:22:04 PM IST |                     |                                 |
| Date Processed:   | 8/29/2019 9:51:20 AM IST  |                     |                                 |

Column: X-Bridge C18 150\*4.6mm 5µm  
 Mobile phase: A) 0.1% TFA in water B) ACN  
 T/%B: 0/5,25/90,35/90,36/5,40/5  
 Flow: 1.0ml/min, Diluent: ACN :H2O (80:20)

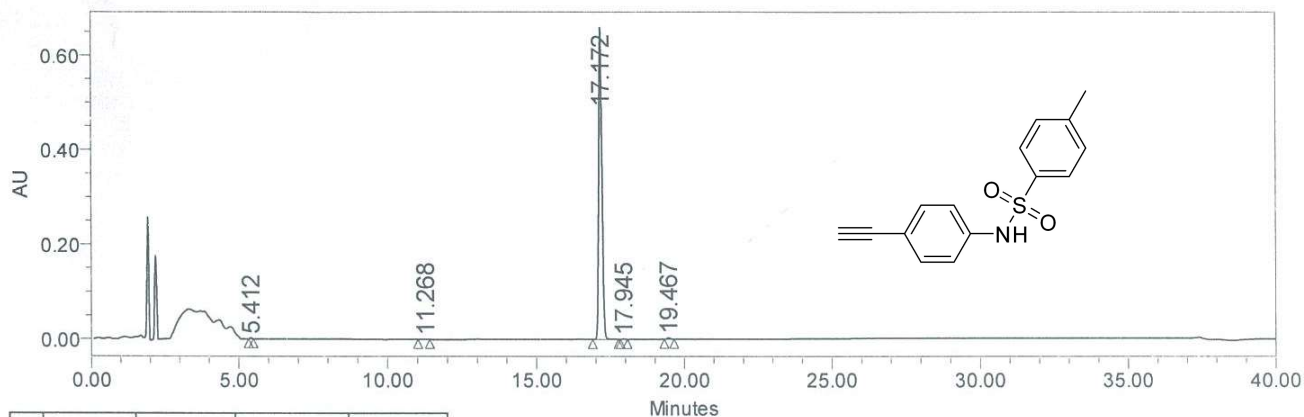

|   | RT     | Height | Area    | % Area |
|---|--------|--------|---------|--------|
| 1 | 5.412  | 1970   | 8763    | 0.17   |
| 2 | 11.268 | 159    | 2520    | 0.05   |
| 3 | 17.172 | 661647 | 5081090 | 99.34  |
| 4 | 17.945 | 159    | 1139    | 0.02   |
| 5 | 19.467 | 2851   | 21525   | 0.42   |

Analysed by *[Signature]*  
29/08/19

Checked by *[Signature]*  
29/08/19



SAMPLE INFORMATION

|                   |                             |                     |              |
|-------------------|-----------------------------|---------------------|--------------|
| Sample Name:      | ILS-BTG-3-Eth-TPS           | Acquired By:        | System       |
| Sample Type:      | Unknown <del>CM194047</del> | Sample Set Name:    | 27082019_07  |
| Vial:             | 33                          | Acq. Method Set:    | API ABT_M    |
| Injection #:      | 1                           | Processing Method:  | ILS PRO      |
| Injection Volume: | 5.00 ul                     | Channel Name:       | 220.0nm      |
| Run Time:         | 35.0 Minutes                | Proc. Chnl. Descr.: | PDA 220.0 nm |
| Date Acquired:    | 8/28/2019 12:01:58 AM IST   |                     |              |
| Date Processed:   | 8/28/2019 10:16:16 AM IST   |                     |              |

Column :X-BRIDGE C18 150\*4.6mm 5um  
 Mobile phase : A) 5mM NH4OAC in water B) ACN  
 T/%B: 0/5,20/90,30/90,31/5,35/5  
 Flow:1.0ml/min,Diluent: ACN:H2O(80:20)

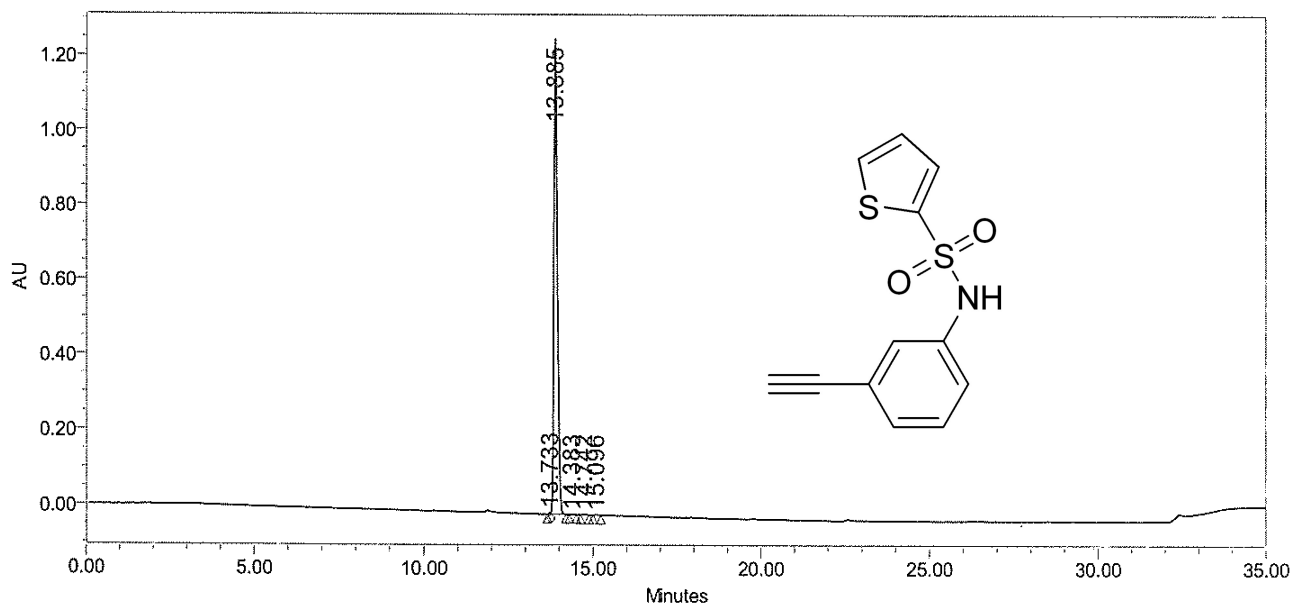

|   | RT     | Height  | Area    | % Area |
|---|--------|---------|---------|--------|
| 1 | 13.733 | 4327    | 14474   | 0.16   |
| 2 | 13.885 | 1263321 | 8878799 | 99.57  |
| 3 | 14.383 | 718     | 4881    | 0.05   |
| 4 | 14.742 | 1495    | 10126   | 0.11   |
| 5 | 15.096 | 1276    | 8814    | 0.10   |

SAMPLE INFORMATION

Sample Name: ILS-BTG-4-ETH-TPS  
A.R.Number: CM20J034  
Vial: 8  
Injection #: 1  
Injection Volume: 10.00 ul  
Run Time: 35.0 Minutes  
Date Acquired: 11/2/2020 9:14:27 PM IST  
Date Processed: 11/11/2020 12:15:40 PM IST  
Acquired By: System  
Sample Set Name: 02112020\_01  
Acq. Method Set: API ABT\_M  
Processing Method: ILS PRO  
Channel Name: 210.0nm  
Proc. Chnl. Descr.: PDA 210.0 nm

Column: Eclipse PLUS C-18 250\*4.6mm 5µm  
Mobile phase: A) 0.1%TFA in water B) ACN  
T/%B: 0/5, 20/90,28/90, 30/5, 35/5  
Flow: 1.0ml/min, Diluent: ACN:H2O (80:20)

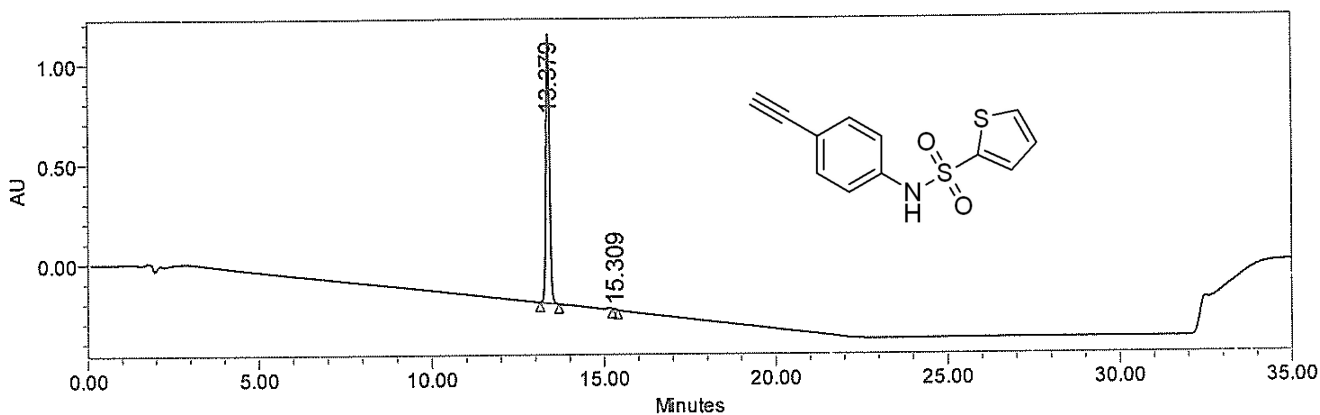

|   | RT     | Height  | Area    | % Area |
|---|--------|---------|---------|--------|
| 1 | 13.379 | 1344176 | 9827311 | 99.91  |
| 2 | 15.309 | 1381    | 9184    | 0.09   |

*[Handwritten signature]*  
11/11/2020

*[Handwritten signature]*  
11/11/2020

Injection Date : Thu, 22. Oct. 2020 Seq Line : 6  
 Sample Name : ILS-BTG-3-ETH-MTS Location : Vial 46  
 Sample Info : CA20J022 -> Inj. No. : 1  
 Inj. Vol. : 10 µl

Acq. Method : C:\Chem32\1\DATA\2020\OCT-2020\22102020-03-RIP 2020-->  
 Analysis Method : C:\CHEM32\1\METHODS\API ABT\_M.M  
 Last Changed : Tue, 27. Oct. 2020, 00:01:37 pm  
 (modified after loading)  
 Column : Eclipse XDB C18 150\*4.6mm 5µm  
 Mobile phase: A) 10mM NH4OAC in H2O B) ACN  
 T/B% : 0/5,20/90,30/90,31/5,35/5  
 Flow:1.0mL/min ,Diluent: ACN:H2O(80:20)

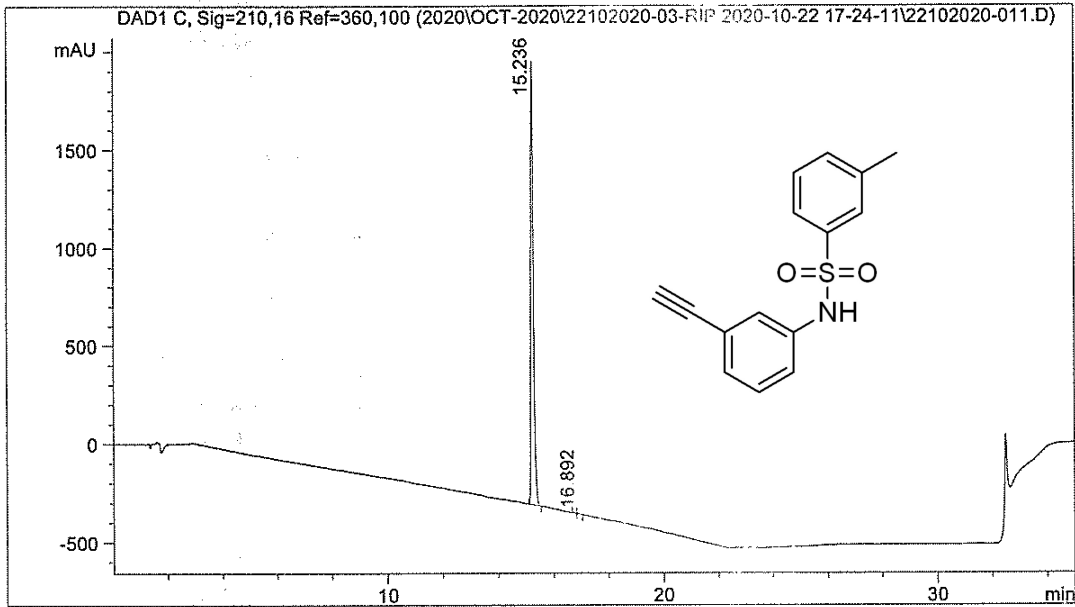

Customized Report: Short

Sorted By Signal  
 Calib. Data Modified : Tue, 27. Oct. 2020,00:01:37 pm  
 Multiplier : 1.000000  
 Dilution : 1.000000  
 Uncalibrated Peaks : not reported

Signal 1: DAD1 C, Sig=210,16 Ref=360,100

| Peak # | RT [min] | Type | Width [min] | Area      | Area % | Name |
|--------|----------|------|-------------|-----------|--------|------|
| 1      | 15.236   | MM   | 0.110       | 14955.461 | 99.779 |      |
| 2      | 16.772   | MF   | 0.107       | 10.655    | 0.071  |      |
| 3      | 16.892   | FM   | 0.099       | 22.442    | 0.150  |      |

\*\*\* End of Report \*\*\*

*Handwritten:* 27/10/2020

*Handwritten:* Rep 27/10/2020

## SAMPLE INFORMATION

|                   |                         |                     |                           |
|-------------------|-------------------------|---------------------|---------------------------|
| Sample Name:      | ILS-BTG-PA-NM-CP        | Acquired By:        | System                    |
| Sample Type:      | Unknown                 | Sample Set Name:    | 10032020_02               |
| Vial:             | 1:B,6                   | Acq. Method Set:    | ABT_M                     |
| Injection #:      | 1                       | Processing Method:  | ILS_PRO                   |
| Injection Volume: | 5.00 ul                 | Channel Name:       | 220.0nm                   |
| Run Time:         | 35.0 Minutes            | Proc. Chnl. Descr.: | PDA Spectrum PDA 220.0 nm |
| Date Acquired:    | 11-03-2020 20:33:28 IST |                     |                           |
| Date Processed:   | 12-03-2020 09:47:40 IST |                     |                           |

Column: ECLIPSE XDB C18 150X4.6mm 5um.  
Mobile Phase: A)10mM Ammonium acetate in Water B) ACN  
T%B: 0/5,20/90,30/90,31/5,35/5  
Flow:1.0 ml/min, Diluent:Water:ACN

## Auto-Scaled Chromatogram

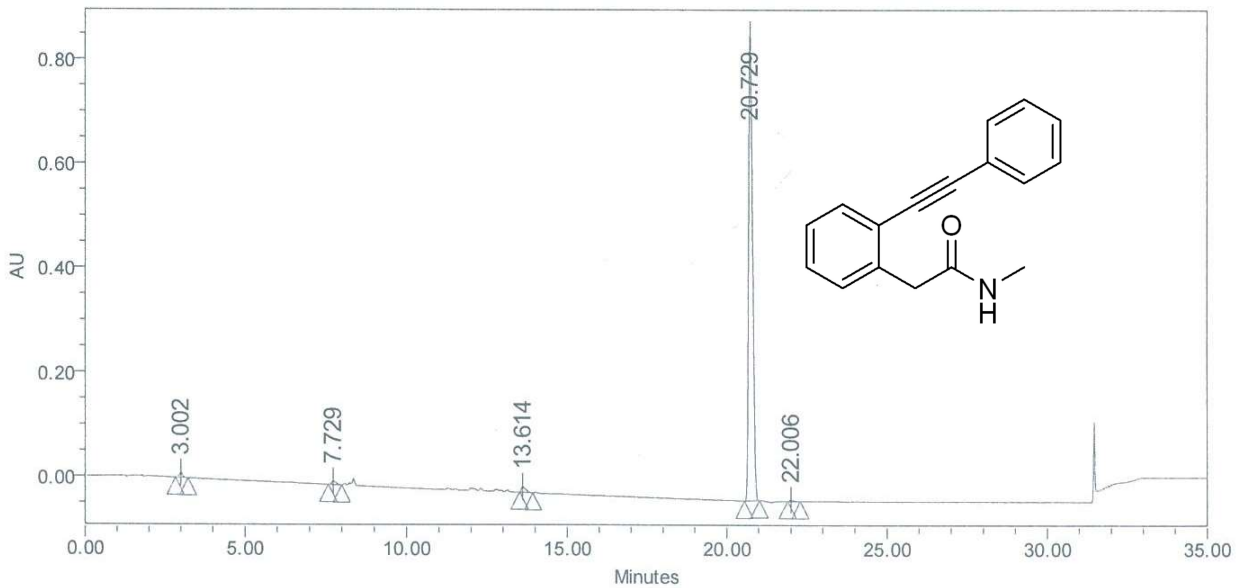

## Peak Results

|   | RT     | Height (µV) | Area    | % Area |
|---|--------|-------------|---------|--------|
| 1 | 3.002  | 10154       | 69787   | 0.86   |
| 2 | 7.729  | 7335        | 67515   | 0.83   |
| 3 | 13.614 | 10955       | 107828  | 1.32   |
| 4 | 20.729 | 896658      | 7878819 | 96.66  |
| 5 | 22.006 | 2923        | 27390   | 0.34   |

Reported by User: System  
Report Method: CPRT\_Report  
Report Method ID: 1294  
Page: 1 of 1

Project Name: 2020MAR\_2020  
Date Printed: 12-03-2020  
09:59:12 Asia/Kolkata

*Signature*  
12/03/2020

*Signature*  
12/03/2020

**SAMPLE INFORMATION**

|                   |                          |                     |                  |
|-------------------|--------------------------|---------------------|------------------|
| Sample Name:      | ILS/BTG/N/ETH/PA/CP      | Acquired By:        | System           |
| A.R.Number:       | C21G012                  | Sample Set Name:    | 21072021_02 CDGO |
| Vial:             | 11                       | Acq. Method Set:    | API ABT _M       |
| Injection #:      | 1                        | Processing Method:  | ILS PROCE        |
| Injection Volume: | 5.00 ul                  | Channel Name:       | 210.0nm          |
| Run Time:         | 35.0 Minutes             | Proc. Chnl. Descr.: | PDA 210.0 nm     |
| Date Acquired:    | 7/21/2021 9:57:23 PM IST |                     |                  |
| Date Processed:   | 7/22/2021 9:10:08 AM IST |                     |                  |

Column: Eclipse XDB C-18 150\*4.6mm 5µm  
 Mobile phase: A) 10mM Ammonium Acetate in Water B) ACN  
 T/%B: 0/5,20/90,30/90,31/5,35/5  
 Flow: 1.0ml/min Diluent:ACN:H2O(80:20)

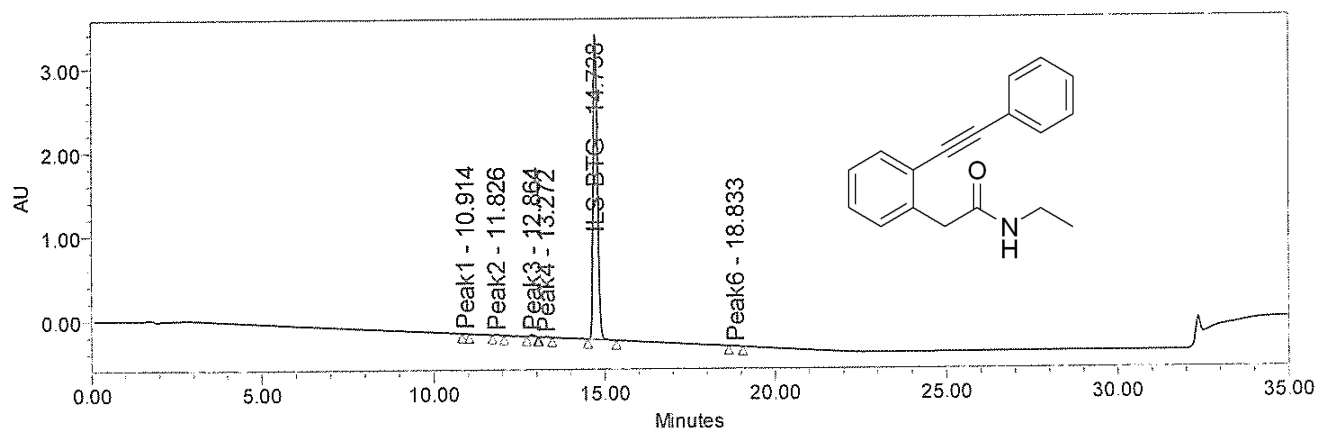

|   | Peak Name | RT     | Height  | Area     | % Area | RT Ratio |
|---|-----------|--------|---------|----------|--------|----------|
| 1 | Peak1     | 10.914 | 5449    | 30663    | 0.09   | 0.74     |
| 2 | Peak2     | 11.826 | 6160    | 62179    | 0.19   | 0.80     |
| 3 | Peak3     | 12.864 | 24641   | 205819   | 0.63   | 0.87     |
| 4 | Peak4     | 13.272 | 6298    | 62183    | 0.19   | 0.90     |
| 5 | ILS-BTG   | 14.738 | 3623627 | 32060107 | 98.76  | 1.00     |
| 6 | Peak6     | 18.833 | 3780    | 41126    | 0.13   | 1.28     |

*[Signature]*  
 22/07/2021

*[Signature]*  
 21/07/21

SAMPLE INFORMATION

|                   |                         |                     |                           |
|-------------------|-------------------------|---------------------|---------------------------|
| Sample Name:      | ILS-NTG-TPA-NM-CP       | Acquired By:        | System                    |
| Sample Type:      | Unknown                 | Sample Set Name:    | 16032020_03               |
| Vial:             | 1:A,7                   | Acq. Method Set:    | ABT_M                     |
| Injection #:      | 1                       | Processing Method:  | ILS_PRO                   |
| Injection Volume: | 5.00 ul                 | Channel Name:       | 210.0nm                   |
| Run Time:         | 35.0 Minutes            | Proc. Chnl. Descr.: | PDA Spectrum PDA 210.0 nm |
| Date Acquired:    | 16-03-2020 22:43:31 IST |                     |                           |
| Date Processed:   | 17-03-2020 17:31:23 IST |                     |                           |

Column: Eclipse plus C18 250X4.6mm 5um.  
 Mobile Phase: A) 5mM NH4OAC in Water B) ACN  
 T%B: 0/5,20/90,30/90,31/5,35/5  
 Flow:1.0 ml/min, Diluent:ACN: H2O (80:20)

Auto-Scaled Chromatogram

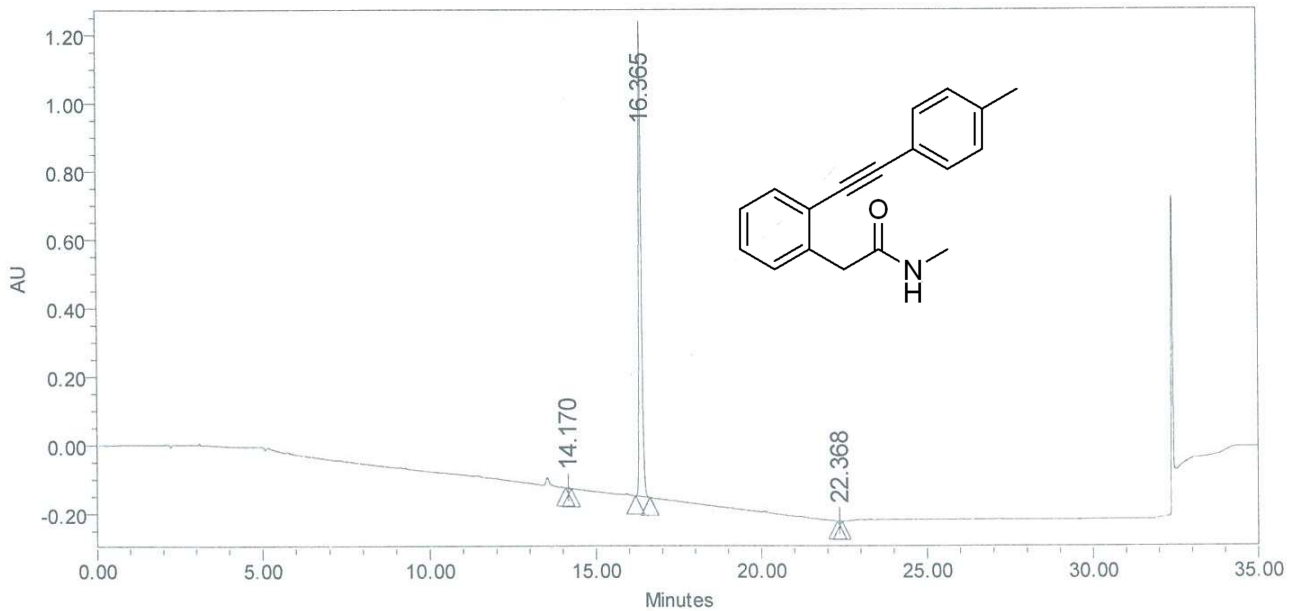

Peak Results

|   | RT     | Height (µV) | Area    | % Area |
|---|--------|-------------|---------|--------|
| 1 | 14.170 | 2205        | 10461   | 0.14   |
| 2 | 16.365 | 1352787     | 7432636 | 99.79  |
| 3 | 22.368 | 1624        | 5533    | 0.07   |

*Handwritten signature*  
17/03/2020

*Handwritten signature*  
17/03/2020

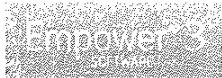

## SAMPLE INFORMATION

|                   |                           |                     |                           |
|-------------------|---------------------------|---------------------|---------------------------|
| Sample Name:      | ILS-BTG-MPA-NM-CP         | Acquired By:        | System                    |
| Sample Type:      | Unknown <i>CM20 C 017</i> | Sample Set Name:    | 12032020_01               |
| Vial:             | 1:C,7                     | Acq. Method Set:    | ABT_M                     |
| Injection #:      | 1                         | Processing Method:  | ILS_PRO                   |
| Injection Volume: | 5.00 ul                   | Channel Name:       | 220.0nm                   |
| Run Time:         | 35.0 Minutes              | Proc. Chnl. Descr.: | PDA Spectrum PDA 220.0 nm |
| Date Acquired:    | 12-03-2020 22:37:19 IST   |                     |                           |
| Date Processed:   | 13-03-2020 10:09:11 IST   |                     |                           |

Column: X-Bridge C18 150X4.6mm 5um.  
 Mobile Phase: A) 5mM NH4OAC in Water B) ACN  
 T%B: 0/5,20/90,30/90,31/5,35/5  
 Flow:1.0 ml/min Diluent:ACN: H2O (80:20)

## Auto-Scaled Chromatogram

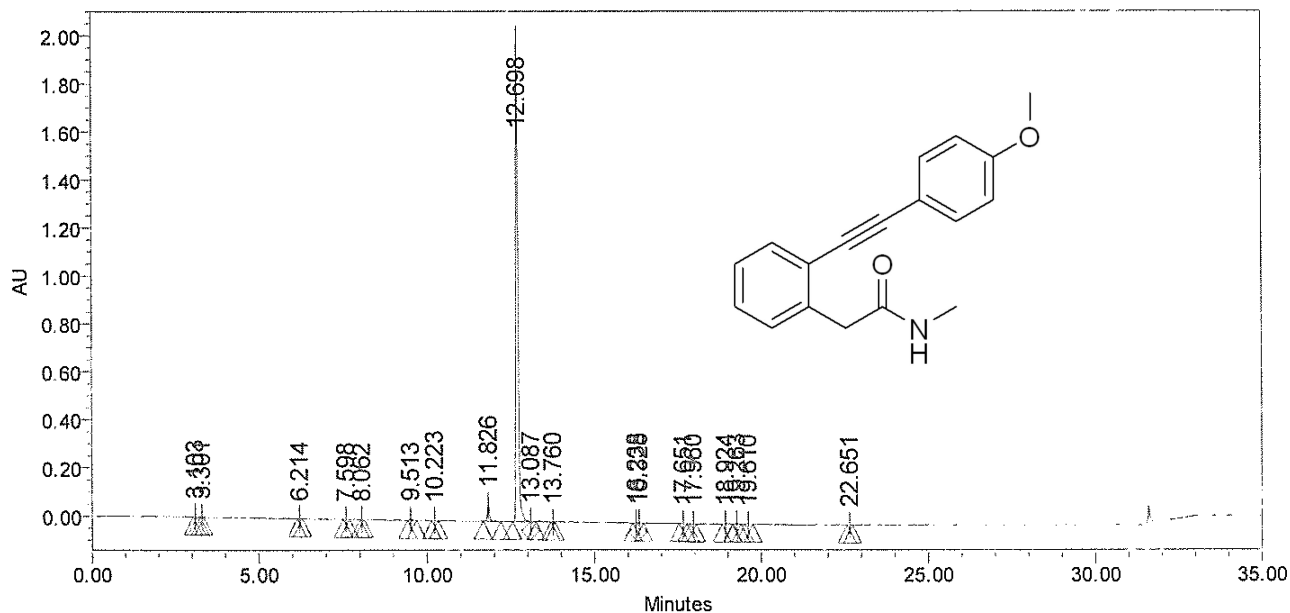

## Peak Results

|   | RT    | Height (μV) | Area  | % Area |    | RT     | Height (μV) | Area    | % Area |    | RT     | Height (μV) | Area  | % Area |
|---|-------|-------------|-------|--------|----|--------|-------------|---------|--------|----|--------|-------------|-------|--------|
| 1 | 3.103 | 236         | 815   | 0.01   | 7  | 10.223 | 604         | 2684    | 0.03   | 13 | 16.328 | 2269        | 11072 | 0.11   |
| 2 | 3.301 | 223         | 673   | 0.01   | 8  | 11.826 | 67171       | 293347  | 2.95   | 14 | 17.651 | 738         | 4045  | 0.04   |
| 3 | 6.214 | 834         | 3316  | 0.03   | 9  | 12.698 | 2023508     | 9555946 | 95.95  | 15 | 17.960 | 482         | 2054  | 0.02   |
| 4 | 7.598 | 554         | 2308  | 0.02   | 10 | 13.087 | 1762        | 8322    | 0.08   | 16 | 18.924 | 1387        | 11536 | 0.12   |
| 5 | 8.062 | 254         | 909   | 0.01   | 11 | 13.760 | 468         | 1944    | 0.02   | 17 | 19.263 | 3472        | 15786 | 0.16   |
| 6 | 9.513 | 5432        | 22214 | 0.22   | 12 | 16.238 | 2947        | 15592   | 0.16   | 18 | 19.610 | 740         | 4595  | 0.05   |

SAMPLE INFORMATION

|                   |                         |                     |                           |
|-------------------|-------------------------|---------------------|---------------------------|
| Sample Name:      | ILS/BTG/FPA/NM/CP       | Acquired By:        | System                    |
| Sample Type:      | Unknown                 | Sample Set Name:    | 12092020_01               |
| Vial:             | 1:A,4                   | Acq. Method Set:    | API ABT_M                 |
| Injection #:      | 1                       | Processing Method:  | ILS_PRO                   |
| Injection Volume: | 5.00 ul                 | Channel Name:       | 280.0nm                   |
| Run Time:         | 35.0 Minutes            | Proc. Chnl. Descr.: | PDA Spectrum PDA 280.0 nm |
| Date Acquired:    | 12-09-2020 14:46:52 IST |                     |                           |
| Date Processed:   | 14-09-2020 11:48:58 IST |                     |                           |

Column: Eclipse XDB C18 150X4.6mm 5um.  
 mobile Phase: A) 10mM Ammoniu acetate in Water B) ACN  
 T%B: 0/5,25/90,30/90,31/5,35/5  
 Flow: 1.0 ml/min, Diluent: ACN:H2O(50:50)

Auto-Scaled Chromatogram

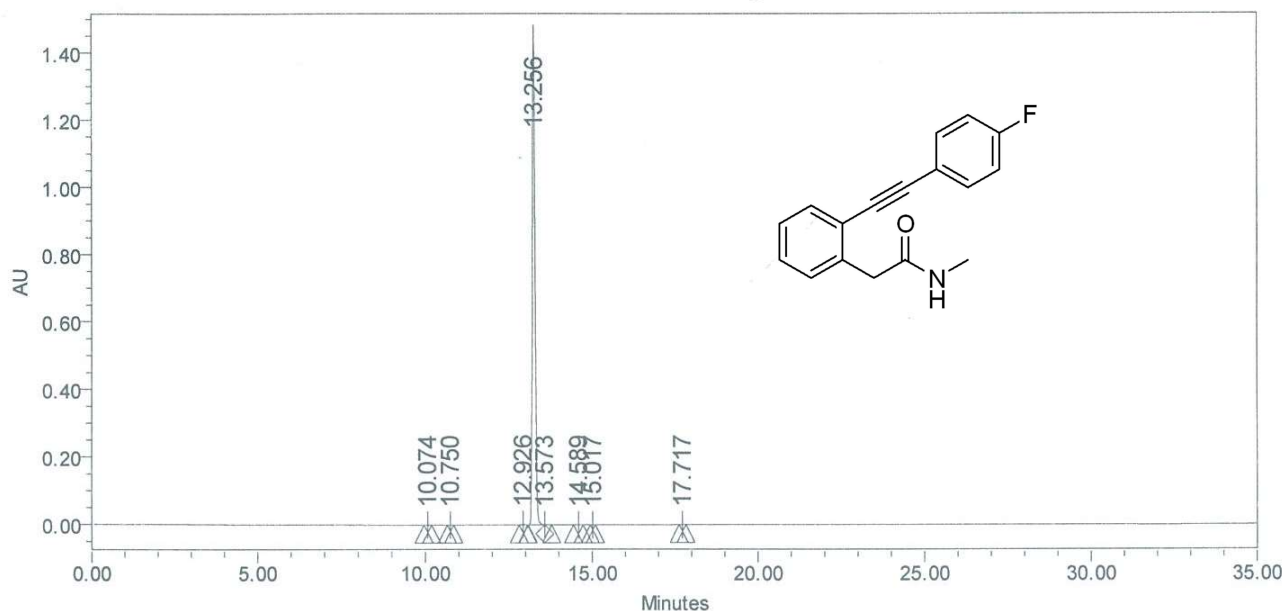

Peak Results

|   | RT     | Height (µV) | Area    | % Area |
|---|--------|-------------|---------|--------|
| 1 | 10.074 | 264         | 1288    | 0.02   |
| 2 | 10.750 | 213         | 1024    | 0.01   |
| 3 | 12.926 | 1782        | 9898    | 0.12   |
| 4 | 13.256 | 1445638     | 8240315 | 99.75  |
| 5 | 13.573 | 686         | 3714    | 0.04   |
| 6 | 14.589 | 243         | 1545    | 0.02   |
| 7 | 15.017 | 93          | 456     | 0.01   |

|   | RT     | Height (µV) | Area | % Area |
|---|--------|-------------|------|--------|
| 8 | 17.717 | 525         | 3057 | 0.04   |

*Handwritten signature*  
14/09/2020

*Handwritten signature*  
14/09/2020



## SAMPLE INFORMATION

|                   |                         |                     |                          |
|-------------------|-------------------------|---------------------|--------------------------|
| Sample Name:      | ILS/BTG/DIFP/ANM/CP     | Acquired By:        | System                   |
| Sample Type:      | Unknown                 | Sample Set Name:    | 15092020_01              |
| Vial:             | 1:A,7                   | Acq. Method Set:    | API SVL_M                |
| Injection #:      | 1                       | Processing Method:  | ILS_PRO                  |
| Injection Volume: | 5.00 ul                 | Channel Name:       | 210.0nm                  |
| Run Time:         | 30.0 Minutes            | Proc. Chnl. Descr.: | PDA Spectrum PDA210.0 nm |
| Date Acquired:    | 15-09-2020 18:35:34 IST |                     |                          |
| Date Processed:   | 16-09-2020 09:08:11 IST |                     |                          |

Column: X-Terra C18 250X4.6mm 5um.

Mobile Phase: A) 0.05% TFA IN WATER in Water B)0.05% TFA IN ACN

T%B: 0/2,5/2,20/90,25/90,26/2,30/2

Flow:1.0 ml/min, Diluent:ACN:H2O(10:90)

## Auto-Scaled Chromatogram

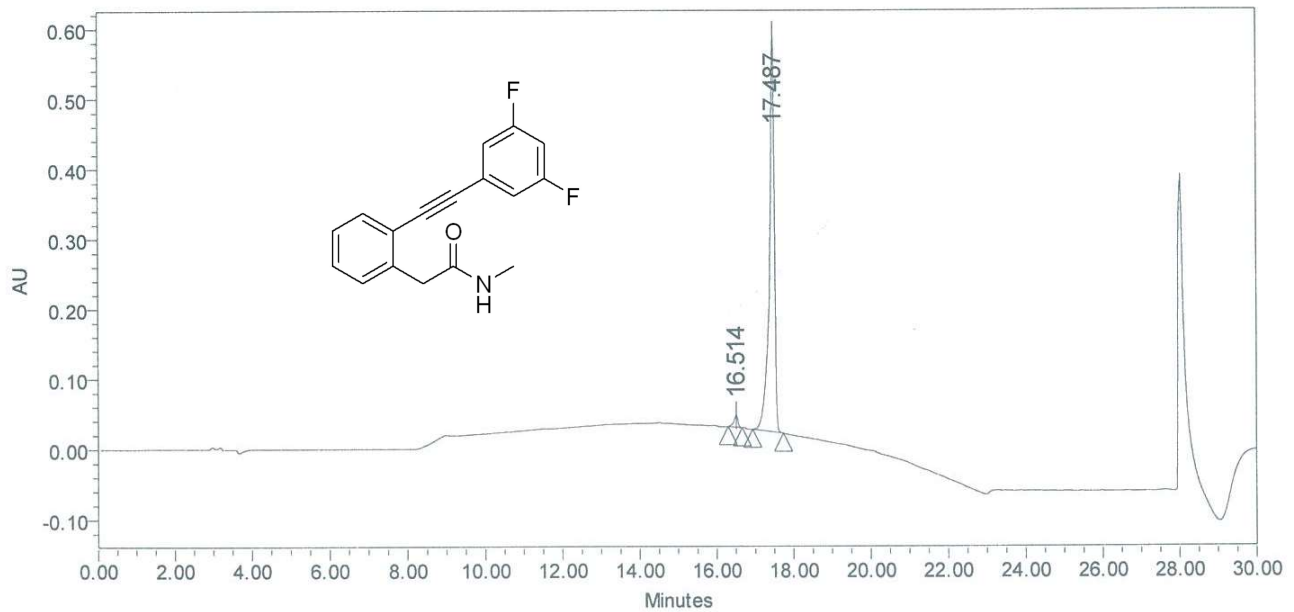

## Peak Results

| RT | Height (µV) | Area   | % Area  |       |
|----|-------------|--------|---------|-------|
| 1  | 16.514      | 16762  | 122344  | 2.33  |
| 2  | 17.487      | 567321 | 5123082 | 97.67 |

*Handwritten signature and date:*  
16/09/2020

=====  
Injection Date : Thu, 8. Oct. 2020 Seq Line : 4  
Sample Name : ILS-BTG-MSPA-NM-CP Location : Vial 43  
Sample Info : CM20J009 -> Inj. No. : 1  
Inj. Vol. : 10 µl

Acq. Method : C:\Chem32\1\DATA\2020\OCT-2020\08102020-02-ABT 2020-->  
Analysis Method : C:\CHEM32\1\METHODS\API ABT\_M.M  
Last Changed : Fri, 9. Oct. 2020, 11:51:27 am  
(modified after loading)

Column : Cosmicsil Aura ODS 150\*4.6mm 5µm  
Mobile phase: A) 10mM NH4OAC in H2O B) ACN  
T/B% : 0/5,20/90,30/90,31/5,35/5  
Flow:1.0mL/min ,Diluent: ACN:H2O(80:20)

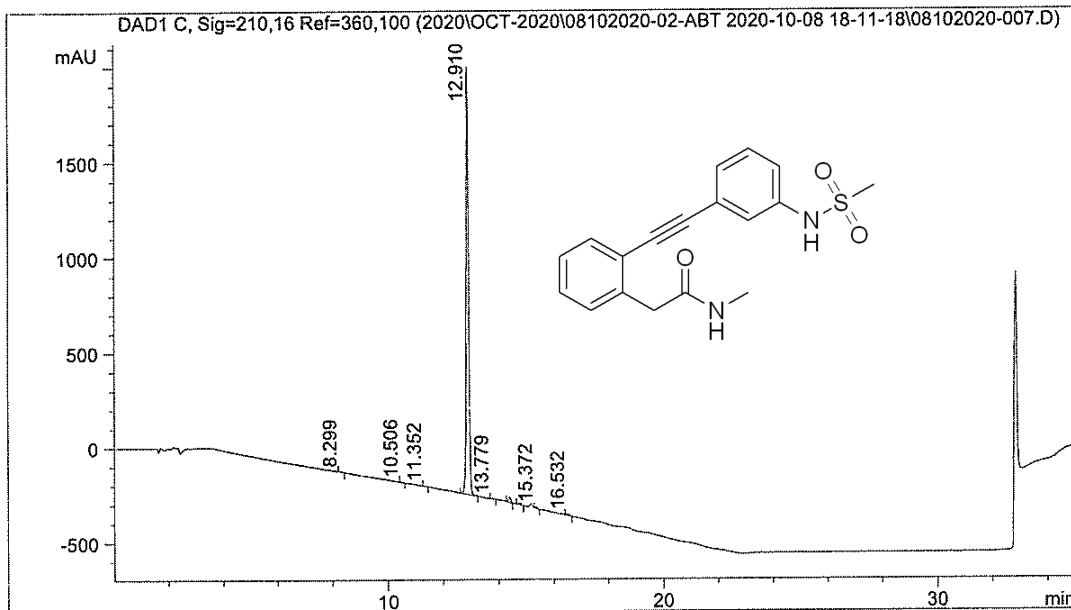

=====  
Customized Report: Short  
=====

Sorted By Signal  
Calib. Data Modified : Fri, 9. Oct. 2020, 11:51:27 am  
Multiplier : 1.000000  
Dilution : 1.000000  
Uncalibrated Peaks : not reported

Signal 1: DAD1 C, Sig=210,16 Ref=360,100

| Peak # | RT [min] | Type | Width [min] | Area      | Area % | Name |
|--------|----------|------|-------------|-----------|--------|------|
| 1      | 8.299    | MM   | 0.114       | 9.383     | 0.064  |      |
| 2      | 10.506   | MM   | 0.108       | 5.614     | 0.038  |      |
| 3      | 11.352   | MM   | 0.082       | 12.639    | 0.086  |      |
| 4      | 12.910   | MM   | 0.107       | 14389.972 | 97.657 |      |
| 5      | 13.779   | MM   | 0.100       | 17.973    | 0.122  |      |
| 6      | 14.399   | MM   | 0.093       | 150.576   | 1.022  |      |
| 7      | 14.779   | MM   | 0.106       | 61.200    | 0.415  |      |
| 8      | 15.372   | MM   | 0.080       | 44.303    | 0.301  |      |
| 9      | 16.532   | MM   | 0.102       | 43.575    | 0.296  |      |

**SAMPLE INFORMATION**

|                   |                            |                     |              |
|-------------------|----------------------------|---------------------|--------------|
| Sample Name:      | ILS-BTG-4MSPA-NM-CP        | Acquired By:        | System       |
| Sample Type:      | Unknown <i>cm20J02g</i>    | Sample Set Name:    | 29102020_01  |
| Vial:             | 31                         | Acq. Method Set:    | API ABT_M    |
| Injection #:      | 1                          | Processing Method:  | ILS PROC     |
| Injection Volume: | 10.00 ul                   | Channel Name:       | 210.0nm      |
| Run Time:         | 35.0 Minutes               | Proc. Chnl. Descr.: | PDA 210.0 nm |
| Date Acquired:    | 10/29/2020 10:11:30 PM IST |                     |              |
| Date Processed:   | 10/30/2020 11:30:04 AM IST |                     |              |

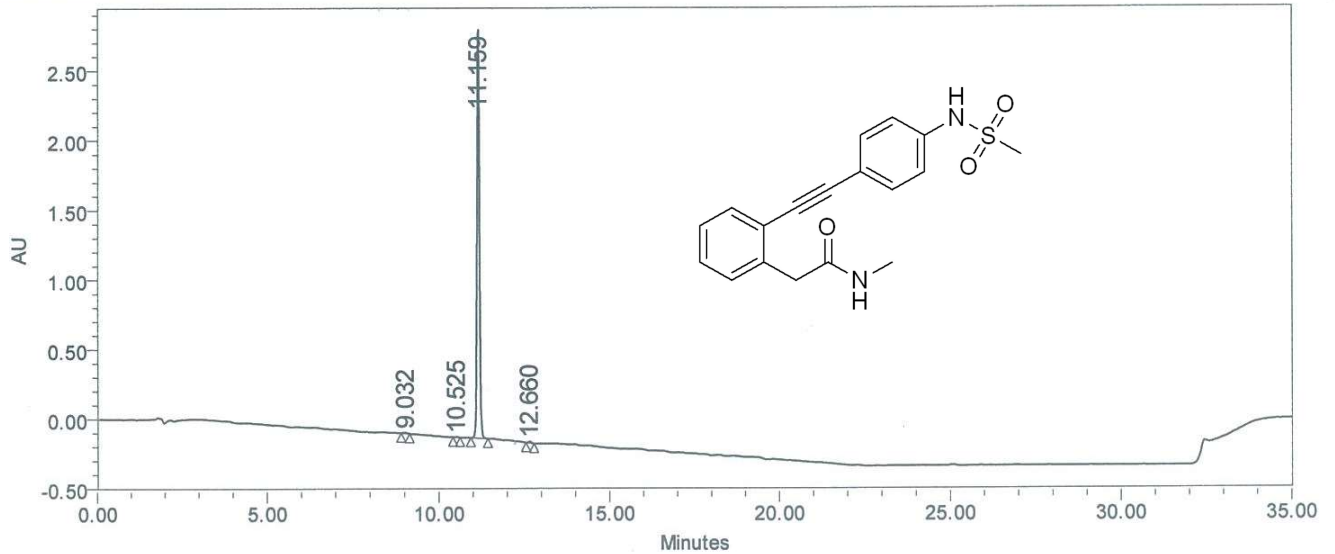

|   | RT     | Height  | Area     | % Area |
|---|--------|---------|----------|--------|
| 1 | 9.032  | 3189    | 25646    | 0.18   |
| 2 | 10.525 | 2532    | 11667    | 0.08   |
| 3 | 11.159 | 2932289 | 14378449 | 99.36  |
| 4 | 12.660 | 10868   | 55799    | 0.39   |

*Method Information :*

*Column: Eclipse XDB C18 150x4.6mm  
 mobile phase: A, 10mM NH<sub>4</sub>OAc in H<sub>2</sub>O B, ACN  
 T/V.B: 0/5, 20/90, 20/90, 31/5, 25/5  
 Flow: 1.0 mL/min, Diluent: ACN:H<sub>2</sub>O (80:20)*

*Amu*  
30/10/2020

*Up*  
30/10/2020

## SAMPLE INFORMATION

|                   |                          |                     |                           |
|-------------------|--------------------------|---------------------|---------------------------|
| Sample Name:      | ILS-BTG-BSPA-NM-CP       | Acquired By:        | System                    |
| Sample Type:      | Unknown <i>CA2051003</i> | Sample Set Name:    | 06102020_01               |
| Vial:             | 1:A,4                    | Acq. Method Set:    | API ABT_M                 |
| Injection #:      | 1                        | Processing Method:  | ILS PRO                   |
| Injection Volume: | 10.00 ul                 | Channel Name:       | 210.0nm                   |
| Run Time:         | 35.0 Minutes             | Proc. Chnl. Descr.: | PDA Spectrum PDA 210.0 nm |
| Date Acquired:    | 06-10-2020 21:37:22 IST  |                     |                           |
| Date Processed:   | 07-10-2020 15:33:28 IST  |                     |                           |

Column: Cosmicsil C18 150X4.6mm 5um.  
Mobile Phase: A) 10mM NH4OAC in Water B) ACN  
T%B: 0/5,20/90,30/90,31/5,35/5  
Flow:1.0 ml/min, Diluent:ACN: H2O (80:20)

## Auto-Scaled Chromatogram

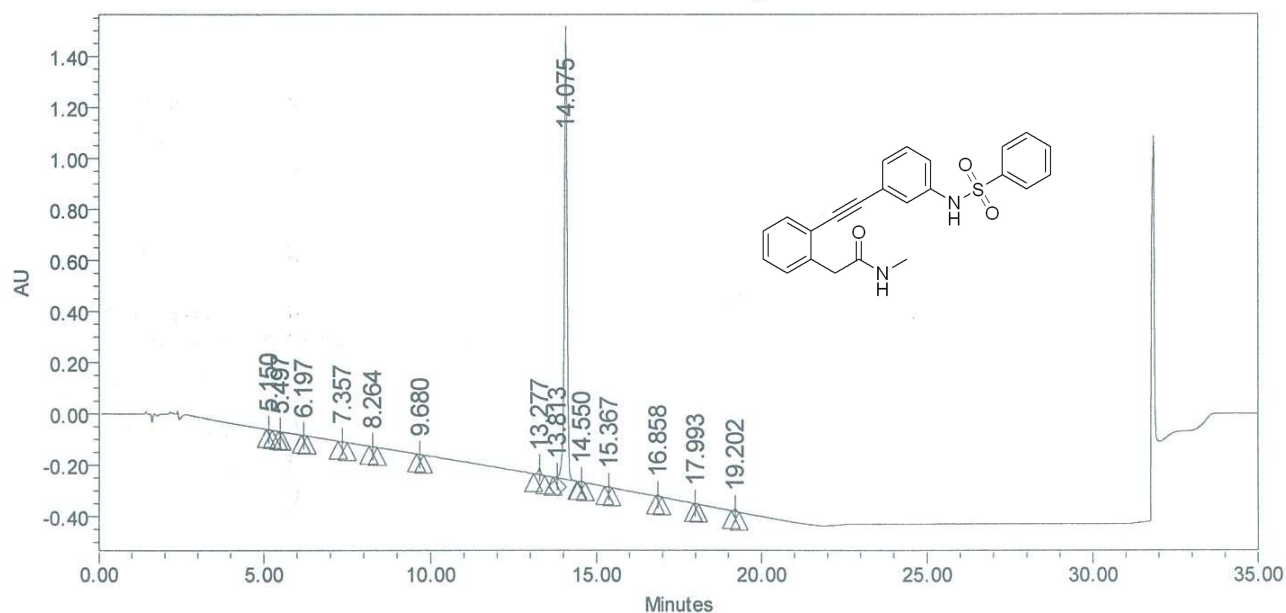

## Peak Results

|   | RT     | Height (μV) | Area   | % Area |
|---|--------|-------------|--------|--------|
| 1 | 5.150  | 579         | 3433   | 0.03   |
| 2 | 5.497  | 956         | 2833   | 0.03   |
| 3 | 6.197  | 573         | 3211   | 0.03   |
| 4 | 7.357  | 997         | 6531   | 0.06   |
| 5 | 8.264  | 591         | 3044   | 0.03   |
| 6 | 9.680  | 791         | 3861   | 0.04   |
| 7 | 13.277 | 26659       | 153410 | 1.42   |

|    | RT     | Height (μV) | Area     | % Area |
|----|--------|-------------|----------|--------|
| 8  | 13.813 | 4722        | 16272    | 0.15   |
| 9  | 14.075 | 1724608     | 10436030 | 96.88  |
| 10 | 14.550 | 4338        | 23965    | 0.22   |
| 11 | 15.367 | 4364        | 20580    | 0.19   |
| 12 | 16.858 | 5963        | 31935    | 0.30   |
| 13 | 17.993 | 1921        | 8584     | 0.08   |
| 14 | 19.202 | 11748       | 58437    | 0.54   |

Reported by User: System  
Report Method: CPRT\_Report2  
Report Method ID: 1163  
Page: 1 of 1

Project Name: 2020\OCT-2020  
Date Printed:  
07-10-2020  
15:38:53 Asia/Kolkata

*Handwritten signature*  
07/10/2020

HPLC REPORT HPLC spectra of compound 2i CPRI@DRILS

Injection Date : Thu, 22. Oct. 2020 Seq Line : 7  
 Sample Name : ILS-BTG-4BSPA-NM-CP Location : Vial 47  
 Sample Info : CM20J023 -> Inj. No. : 1  
 Inj. Vol. : 10 µl

Acq. Method : C:\Chem32\1\DATA\2020\OCT-2020\22102020-03-RIP 2020-->  
 Analysis Method : C:\CHEM32\1\METHODS\API ABT\_M.M  
 Last Changed : Tue, 27. Oct. 2020, 00:03:48 pm  
 (modified after loading)

Column : Eclipse XDB C18 150\*4.6mm 5µm  
 Mobile phase: A) 10mM NH4OAC in H2O B) ACN  
 T/B% : 0/5, 20/90, 30/90, 31/5, 35/5  
 Flow: 1.0mL/min , Diluent: ACN:H2O (80:20)

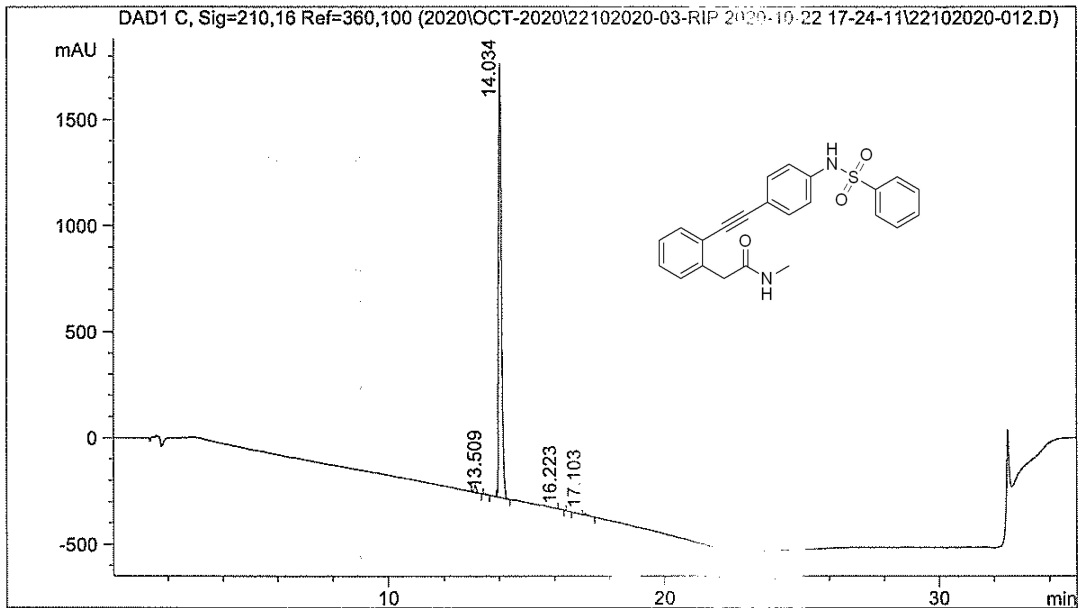

Customized Report: Short

Sorted By Signal

Calib. Data Modified : Tue, 27. Oct. 2020, 00:03:48 pm  
 Multiplier : 1.000000  
 Dilution : 1.000000  
 Uncalibrated Peaks : not reported

Signal 1: DAD1 C, Sig=210,16 Ref=360,100

| Peak # | RT [min] | Type | Width [min] | Area      | Area % | Name |
|--------|----------|------|-------------|-----------|--------|------|
| 1      | 13.126   | MM   | 0.099       | 218.015   | 1.47   |      |
| 2      | 13.509   | MM   | 0.091       | 27.790    | 0.19   |      |
| 3      | 14.034   | MM   | 0.119       | 14584.187 | 97.535 |      |
| 4      | 16.223   | MM   | 0.096       | 19.473    | 0.13   |      |
| 5      | 16.489   | MM   | 0.114       | 8.137     | 0.05   |      |
| 6      | 17.103   | MM   | 0.160       | 95.317    | 0.63   |      |



SAMPLE INFORMATION

|                   |                         |                     |                           |
|-------------------|-------------------------|---------------------|---------------------------|
| Sample Name:      | ILS-BTG-TSPA-NM-CP      | Acquired By:        | System                    |
| Sample Type:      | Control                 | Sample Set Name     | 30092020_02               |
| Vial:             | 1:B,5                   | Acq. Method Set:    | API ABT_M                 |
| Injection #:      | 1                       | Processing Method:  | ILS_PRO                   |
| Injection Volume: | 10.00 ul                | Channel Name:       | 210.0nm                   |
| Run Time:         | 35.0 Minutes            | Proc. Chnl. Descr.: | PDA Spectrum PDA 210.0 nm |
| Date Acquired:    | 30-09-2020 22:12:07 IST |                     |                           |
| Date Processed:   | 01-10-2020 10:22:43 IST |                     |                           |

Column: Cosmicsil C18 150X4.6mm 5um.  
 Mobile Phase: A) 10mM NH4OAC in Water B) ACN  
 T%B: 0/5,20/90,30/90,31/5,35/5  
 Flow:1.0 ml/min, Diluent:ACN: H2O (80:20)

Auto-Scaled Chromatogram

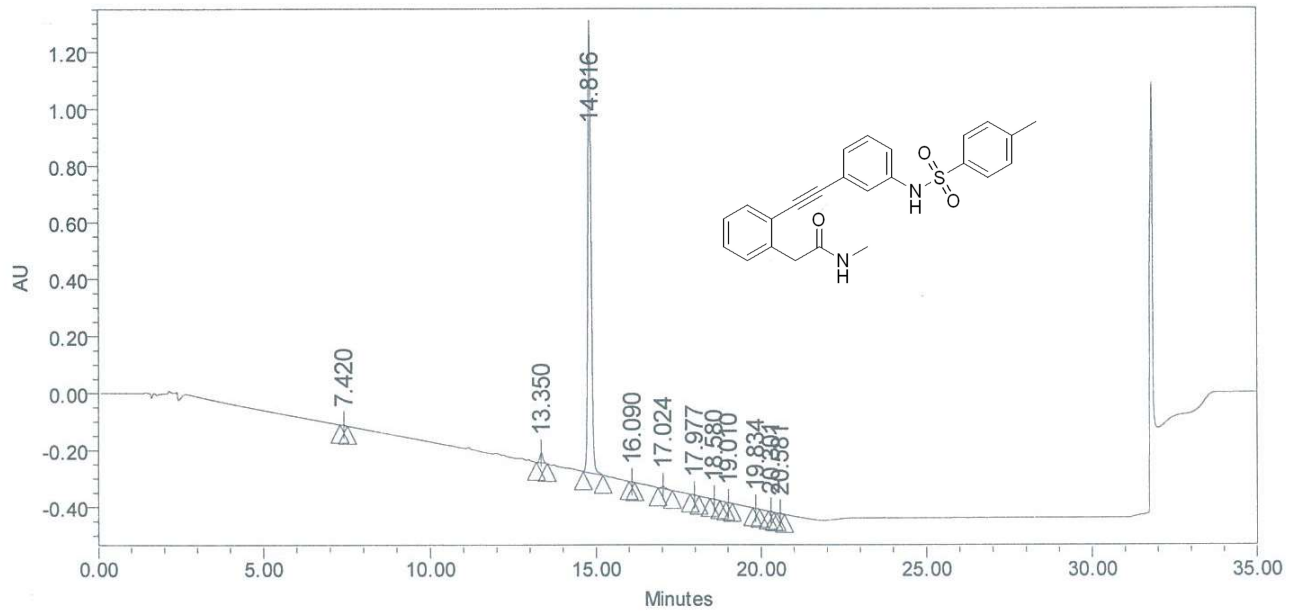

Peak Results

|   | RT     | Height (µV) | Area     | % Area |
|---|--------|-------------|----------|--------|
| 1 | 7.420  | 2964        | 17887    | 0.16   |
| 2 | 13.350 | 35263       | 231699   | 2.06   |
| 3 | 14.816 | 1545273     | 10876008 | 96.51  |
| 4 | 16.090 | 1319        | 7066     | 0.06   |
| 5 | 17.024 | 8913        | 85070    | 0.75   |
| 6 | 17.977 | 1328        | 7572     | 0.07   |
| 7 | 18.580 | 1520        | 12394    | 0.11   |

|    | RT     | Height (µV) | Area  | % Area |
|----|--------|-------------|-------|--------|
| 8  | 19.010 | 1000        | 5619  | 0.05   |
| 9  | 19.834 | 947         | 5178  | 0.05   |
| 10 | 20.301 | 1926        | 8616  | 0.08   |
| 11 | 20.581 | 1895        | 11815 | 0.10   |

Reported by User: System  
 Report Method: CPRT\_Report2  
 Report Method ID: 2994  
 Page: 1 of 1

Project Name: 2020\SEP-2020  
 Date Printed:  
 01-10-2020  
 10:43:12 Asia/Kolkata

*Sumy*  
01/10/2020

*Uf*  
01/10/2020

Injection Date : Mon, 12. Oct. 2020 Seq Line : 7  
 Sample Name : ILS-BTG-4TSPA-NM-CP Location : Vial 25  
 Sample Info : CM20J012 -> Inj. No. : 1  
 Inj. Vol. : 10 µl

Acq. Method : C:\Chem32\1\DATA\2020\OCT-2020\12102020-02-ABT 2020-->  
 Analysis Method : C:\CHEM32\1\METHODS\API ABT\_M.M  
 Last Changed : Tue, 13. Oct. 2020, 11:02:48 am  
 (modified after loading)

Column : X-Bridge C18 150\*4.6mm 3.5µm  
 Mobile phase: A) 10mM NH4OAC in H2O B) ACN  
 T/B% : 0/5,20/90,30/90,31/5,35/5  
 Flow:1.0mL/min ,Diluent: ACN:H2O (80:20)

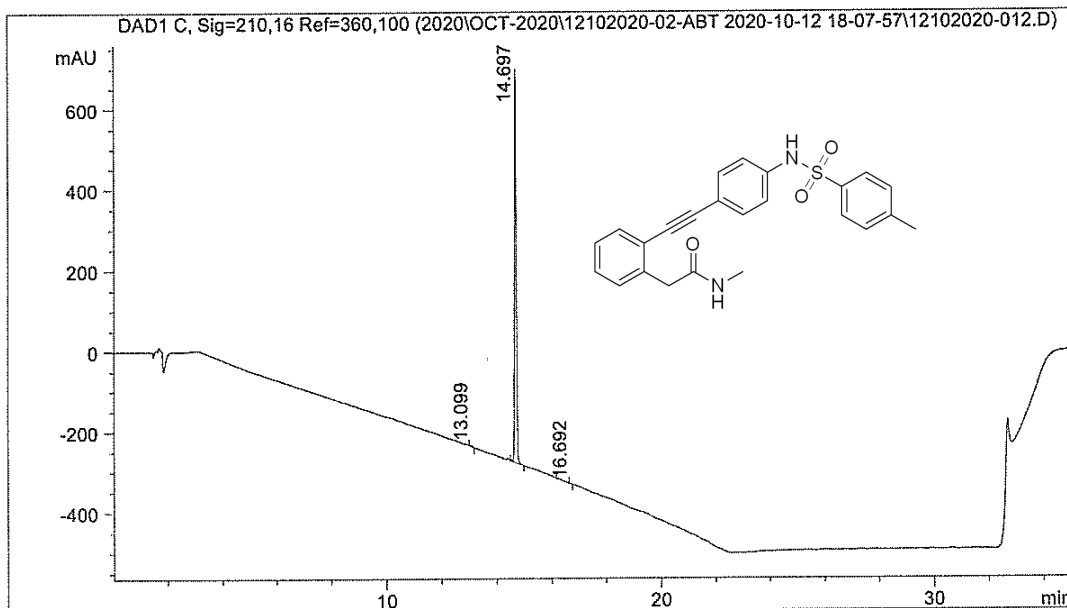

=====  
 Customized Report: Short  
 =====

Sorted By Signal  
 Calib. Data Modified : Tue, 13. Oct. 2020,11:02:48 am  
 Multiplier : 1.000000  
 Dilution : 1.000000  
 Uncalibrated Peaks : not reported

Signal 1: DAD1 C, Sig=210,16 Ref=360,100

| Peak # | RT [min] | Type | Width [min] | Area     | Area % | Name |
|--------|----------|------|-------------|----------|--------|------|
| 1      | 13.099   | MM   | 0.079       | 16.618   | 0.398  |      |
| 2      | 14.697   | MM   | 0.070       | 4153.440 | 99.504 |      |
| 3      | 16.692   | MM   | 0.061       | 4.088    | 0.098  |      |

=====  
 \*\*\* End of Report \*\*\*  
 =====

*Handwritten signature*  
 13/10/2020

*Handwritten signature*  
 13/10/2020

**SAMPLE INFORMATION**

|                                           |                     |                     |              |
|-------------------------------------------|---------------------|---------------------|--------------|
| Sample Name:                              | ILS-BTG-TPSPA-NM-CP | Acquired By:        | System       |
| A.R.Number:                               | CM20J001            | Sample Set Name:    | 01102020_03  |
| Vial:                                     | 11                  | Acq. Method Set:    | API ABT_M    |
| Injection #:                              | 1                   | Processing Method:  | ILS PRO      |
| Injection Volume:                         | 10.00 ul            | Channel Name:       | 210.0nm      |
| Run Time:                                 | 35.0 Minutes        | Proc. Chnl. Descr.: | PDA 210.0 nm |
| Date Acquired: 10/1/2020 8:09:35 PM IST   |                     |                     |              |
| Date Processed: 10/5/2020 10:16:20 AM IST |                     |                     |              |

Column: Cosmicsil Aura C-18 150\*4.6mm 5µm  
 Mobile phase: A) 10 mMNH4OAC in water B) ACN  
 T/%B: 0/5, 20/90,30/90, 31/5, 35/5  
 Flow: 1.0ml/min, Diluent: ACN:H2O (80:20)

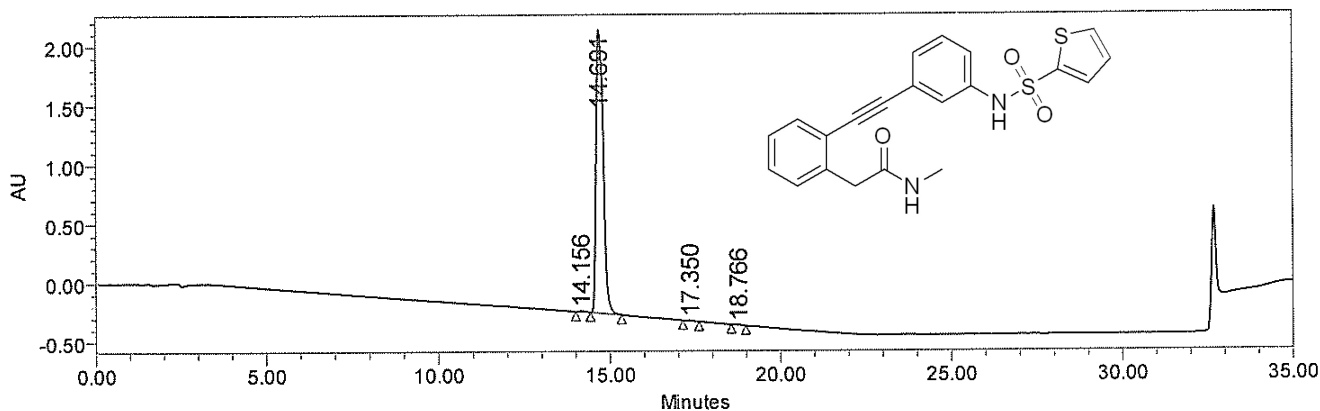

|   | RT     | Height  | Area     | % Area |
|---|--------|---------|----------|--------|
| 1 | 14.156 | 9981    | 129023   | 0.37   |
| 2 | 14.691 | 2400590 | 34662800 | 99.41  |
| 3 | 17.350 | 3272    | 42587    | 0.12   |
| 4 | 18.766 | 2526    | 34496    | 0.10   |

*Alamy*  
05/10/2020



## SAMPLE INFORMATION

|                   |                         |                     |                           |
|-------------------|-------------------------|---------------------|---------------------------|
| Sample Name:      | ILS/BTG/4TPSPA/NM/CP    | Acquired By:        | System                    |
| Sample Type:      | Unknown                 | Sample Set Name:    | 02112020_02               |
| Vial:             | 1:A,5                   | Acq. Method Set:    | API LAR_M                 |
| Injection #:      | 1                       | Processing Method:  | ILS PRO                   |
| Injection Volume: | 5.00 ul                 | Channel Name:       | 210.0nm                   |
| Run Time:         | 35.0 Minutes            | Proc. Chnl. Descr.: | PDA Spectrum PDA 210.0 nm |
| Date Acquired:    | 03-11-2020 19:51:54 IST |                     |                           |
| Date Processed:   | 04-11-2020 10:45:30 IST |                     |                           |

Column: Eclipse PLUS C18 250X4.6mm 5um.  
mobile Phase: A) 0.1% TFA in Water B) ACN  
T%B: 0/5,20/90,28/90,30/5,35/5  
Flow: 1.0 ml/min, Diluent: ACN:H2O(80:20)

## Auto-Scaled Chromatogram

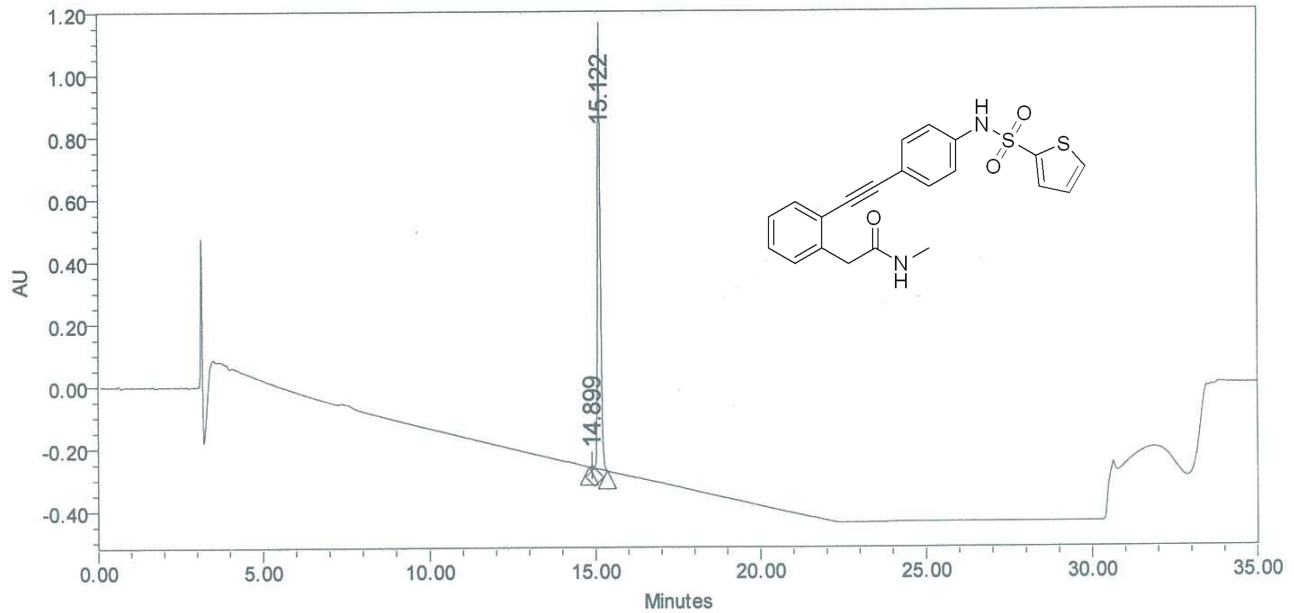

## Peak Results

|   | RT     | Height<br>( $\mu$ V) | Area    | % Area | Name |
|---|--------|----------------------|---------|--------|------|
| 1 | 14.899 | 7173                 | 39260   | 0.46   |      |
| 2 | 15.122 | 1391353              | 8421977 | 99.54  |      |

Reported by User: System  
Report Method: CPRT\_Report2  
Report Method ID: 1176  
Page: 1 of 1

Project Name: 2020\NOV-2020  
Date Printed:  
04-11-2020  
10:48:05 Asia/Kolkata

*Handwritten signature*  
04/11/2020

*Handwritten signature*  
04/11/2020

| SAMPLE INFORMATION |                         |                     |                           |
|--------------------|-------------------------|---------------------|---------------------------|
| Sample Name:       | ILS/BTG/MTSPA/NM/CP     | Acquired By:        | System                    |
| Sample Type:       | Unknown                 | Sample Set Name     | 04112020_02               |
| Vial:              | 1:B,1                   | Acq. Method Set:    | API LAR_M                 |
| Injection #:       | 1                       | Processing Method:  | ILS PRO                   |
| Injection Volume:  | 5.00 ul                 | Channel Name:       | 210.0nm                   |
| Run Time:          | 35.0 Minutes            | Proc. Chnl. Descr.: | PDA Spectrum PDA 210.0 nm |
| Date Acquired:     | 04-11-2020 20:09:59 IST |                     |                           |
| Date Processed:    | 05-11-2020 10:41:04 IST |                     |                           |

Column: Eclipse PLUS C18 250X4.6mm 5um.  
 mobile Phase: A) 0.1% TFA in Water B) ACN  
 T%B: 0/5,20/90,28/90,30/5,35/5  
 Flow: 1.0 ml/min, Diluent: ACN:H2O(80:20)

Auto-Scaled Chromatogram

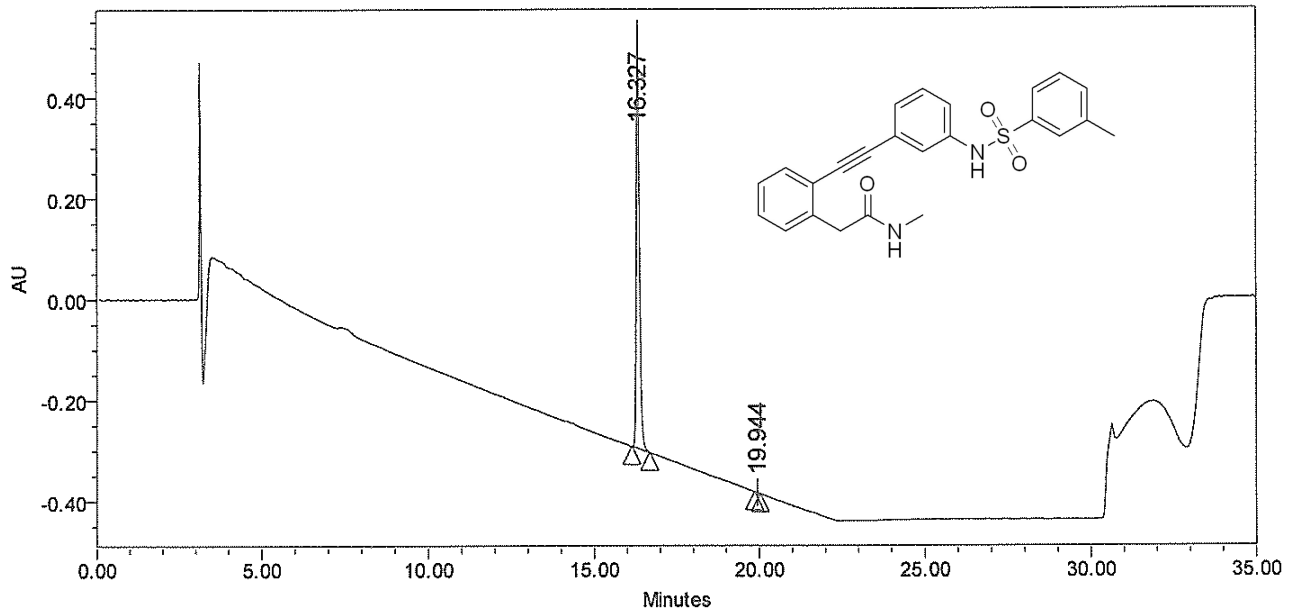

Peak Results

|   | RT     | Height (µV) | Area    | % Area | Name |
|---|--------|-------------|---------|--------|------|
| 1 | 16.327 | 823177      | 5478613 | 99.91  |      |
| 2 | 19.944 | 846         | 4692    | 0.09   |      |

*[Handwritten Signature]*  
 05/11/2020

*[Handwritten Signature]*  
 05/11/2020

**SAMPLE INFORMATION**

|                   |                           |                     |              |
|-------------------|---------------------------|---------------------|--------------|
| Sample Name:      | ILS-BTG-PA-NM-MVK         | Acquired By:        | System       |
| A.R.Number:       | CM201043                  | Sample Set Name:    | 29092020_02  |
| Vial:             | 82                        | Acq. Method Set:    | API ABT_M    |
| Injection #:      | 1                         | Processing Method:  | ILS PRO      |
| Injection Volume: | 10.00 ul                  | Channel Name:       | 210.0nm      |
| Run Time:         | 35.0 Minutes              | Proc. Chnl. Descr.: | PDA 210.0 nm |
| Date Acquired:    | 9/29/2020 11:06:26 PM IST |                     |              |
| Date Processed:   | 9/30/2020 10:19:13 AM IST |                     |              |

Column: ECLIPSE PLUS C-18 250\*4.6mm 5um  
 Mobile phase: A) 0.05% TFA in water B) 0.05% TFA in ACN  
 T/%B: 0/5,20/90,30/90,31/5,35/5  
 Flow: 1.0ml/min, Diluent: ACN:H2O(80:20)

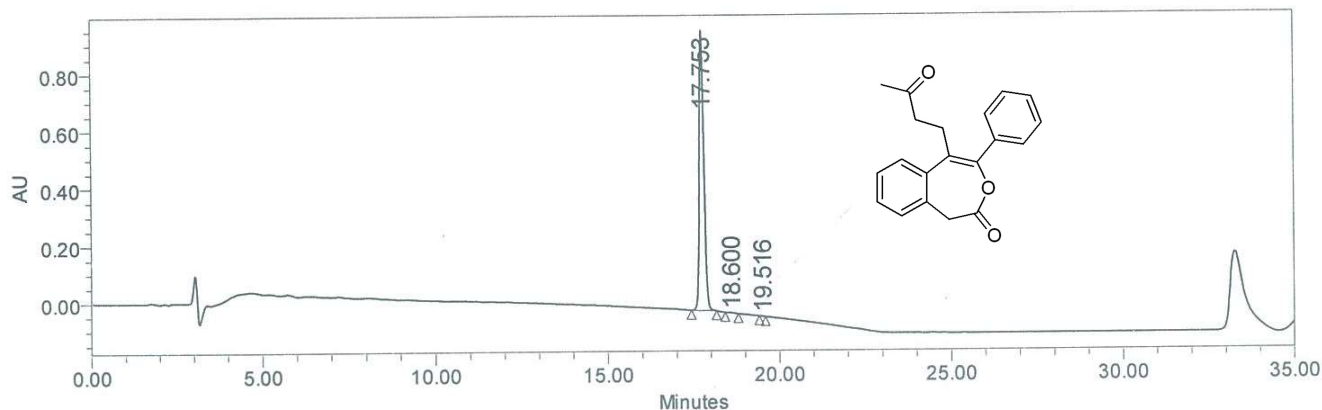

|   | RT     | Height | Area    | % Area |
|---|--------|--------|---------|--------|
| 1 | 17.753 | 978985 | 9118672 | 99.82  |
| 2 | 18.600 | 1179   | 14241   | 0.16   |
| 3 | 19.516 | 423    | 2522    | 0.03   |

*Ammy*  
30/09/2020

*by*  
30/09/2020

HPLC REPORT HPLC spectra of compound 3b CPRI@DRILS

Injection Date : Thu, 22. Oct. 2020 Seq Line : 4  
 Sample Name : ILS-BTG-TPA-NM-MVK Location : Vial 44  
 Sample Info : CM20J020 -> Inj. No. : 1  
 Inj. Vol. : 10 µl

Acq. Method : C:\Chem32\1\DATA\2020\OCT-2020\22102020-03-RIP 2020-->  
 Analysis Method : C:\CHEM32\1\METHODS\API ABT\_M.M  
 Last Changed : Tue, 27. Oct. 2020, 00:00:19 pm  
 (modified after loading)

Column : Eclipse XDB C18 150\*4.6mm 5µm  
 Mobile phase: A) 10mM NH4OAC in H2O B) ACN  
 T/B% : 0/5,20/90,30/90,31/5,35/5  
 Flow:1.0mL/min ,Diluent: ACN:H2O(80:20)

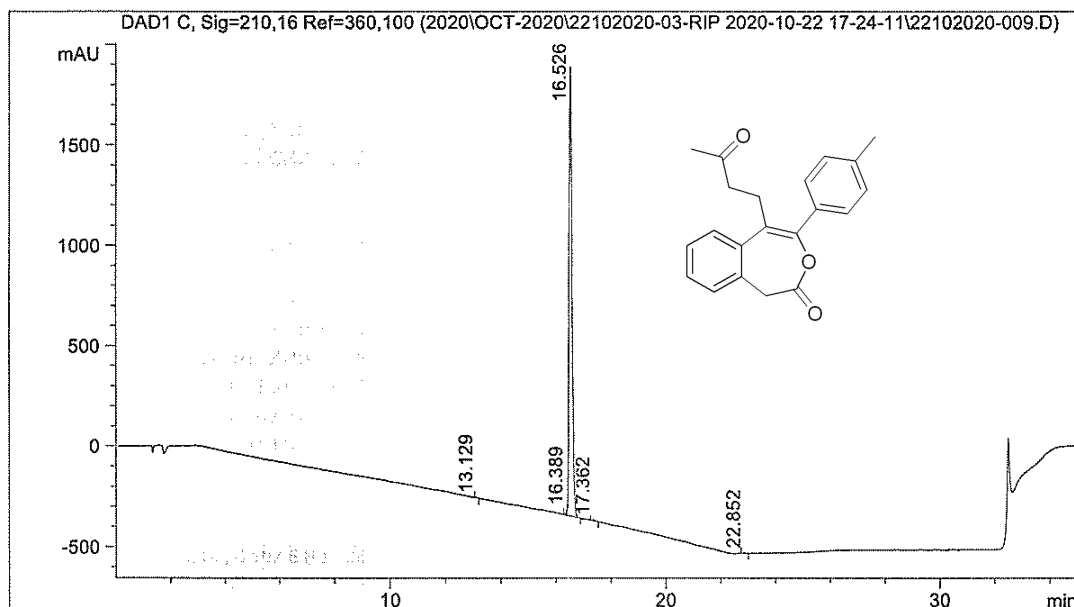

=====  
 Customized Report: Short  
 =====

Sorted By Signal  
 Calib. Data Modified : Tue, 27. Oct. 2020,00:00:19 pm  
 Multiplier : 1.000000  
 Dilution : 1.000000  
 Uncalibrated Peaks : not reported

Signal 1: DAD1 C, Sig=210,16 Ref=360,100

| Peak # | RT [min] | Type | Width [min] | Area      | Area % | Name |
|--------|----------|------|-------------|-----------|--------|------|
| 1      | 13.129   | MM   | 0.082       | 5.011     | 0.030  |      |
| 2      | 16.389   | MF   | 0.064       | 105.715   | 0.642  |      |
| 3      | 16.526   | FM   | 0.121       | 16304.859 | 99.085 |      |
| 4      | 17.362   | MM   | 0.101       | 27.104    | 0.165  |      |
| 5      | 22.852   | MM   | 0.116       | 12.776    | 0.078  |      |

=====  
 \*\*\* End of Report \*\*\*  
 =====

*Ann*  
 27/10/2020

*ly*  
 27/10/2020

## SAMPLE INFORMATION

|                   |                          |                     |                           |
|-------------------|--------------------------|---------------------|---------------------------|
| Sample Name:      | ILS-BTG-TPA-NM-MVK       | Acquired By:        | System                    |
| Sample Type:      | Unknown <i>emp20J004</i> | Sample Set Name:    | 06102020_01               |
| Vial:             | 1:A,5                    | Acq. Method Set:    | API ABT_M                 |
| Injection #:      | 1                        | Processing Method:  | ILS PRO                   |
| Injection Volume: | 10.00 ul                 | Channel Name:       | 260.0nm                   |
| Run Time:         | 35.0 Minutes             | Proc. Chnl. Descr.: | PDA Spectrum PDA 260.0 nm |
| Date Acquired:    | 06-10-2020 22:15:26 IST  |                     |                           |
| Date Processed:   | 07-10-2020 15:34:48 IST  |                     |                           |

Column: Cosmicsil C18 150X4.6mm 5um.  
Mobile Phase: A) 10mM NH4OAC in Water B) ACN  
T%B: 0/5,20/90,30/90,31/5,35/5  
Flow: 1.0 ml/min, Diluent: ACN: H2O (80:20)

## Auto-Scaled Chromatogram

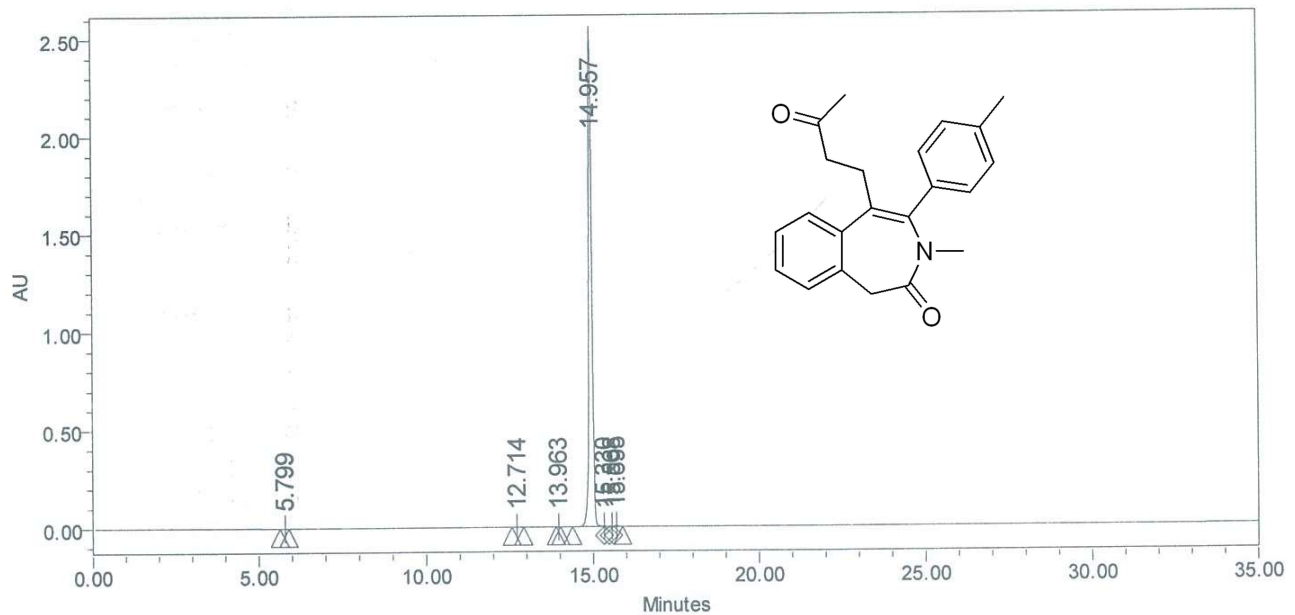

## Peak Results

|   | RT     | Height (μV) | Area     | % Area |
|---|--------|-------------|----------|--------|
| 1 | 5.799  | 176         | 1467     | 0.01   |
| 2 | 12.714 | 371         | 3587     | 0.02   |
| 3 | 13.963 | 110         | 447      | 0.00   |
| 4 | 14.957 | 2493092     | 17512006 | 99.72  |
| 5 | 15.330 | 820         | 5204     | 0.03   |
| 6 | 15.568 | 1790        | 10592    | 0.06   |
| 7 | 15.695 | 4535        | 28599    | 0.16   |

Reported by User: System  
Report Method: CPRT\_Report2  
Report Method ID: 1163  
Page: 1 of 1

Project Name: 2020\OCT-2020

Date Printed:  
07-10-2020

15:39:36 Asia/Kolkata

*hmm*  
07/10/2020

HPLC REPORT HPLC spectra of compound 3c CPRI@DRILS

```

=====
Injection Date   : Thu, 22. Oct. 2020           Seq Line   :           5
Sample Name     : ILS-BTG-MPA-NM-MVK          Location    :           Vial 45
Sample Info    : CM20J021                    -> Inj. No.   :           1
                                           Inj. Vol.   :          10 µl
=====
  
```

```

Acq. Method     : C:\Chem32\1\DATA\2020\OCT-2020\22102020-03-RIP 2020-->
Analysis Method : C:\CHEM32\1\METHODS\API ABT_M.M
Last Changed    : Tue, 27. Oct. 2020, 11:59:11 am
                  (modified after loading)
  
```

```

Column : Eclipse XDB C18 150*4.6mm 5µm
Mobile phase: A) 10mM NH4OAC in H2O B) ACN
T/B% : 0/5,20/90,30/90,31/5,35/5
Flow:1.0mL/min ,Diluent: ACN:H2O(80:20)
  
```

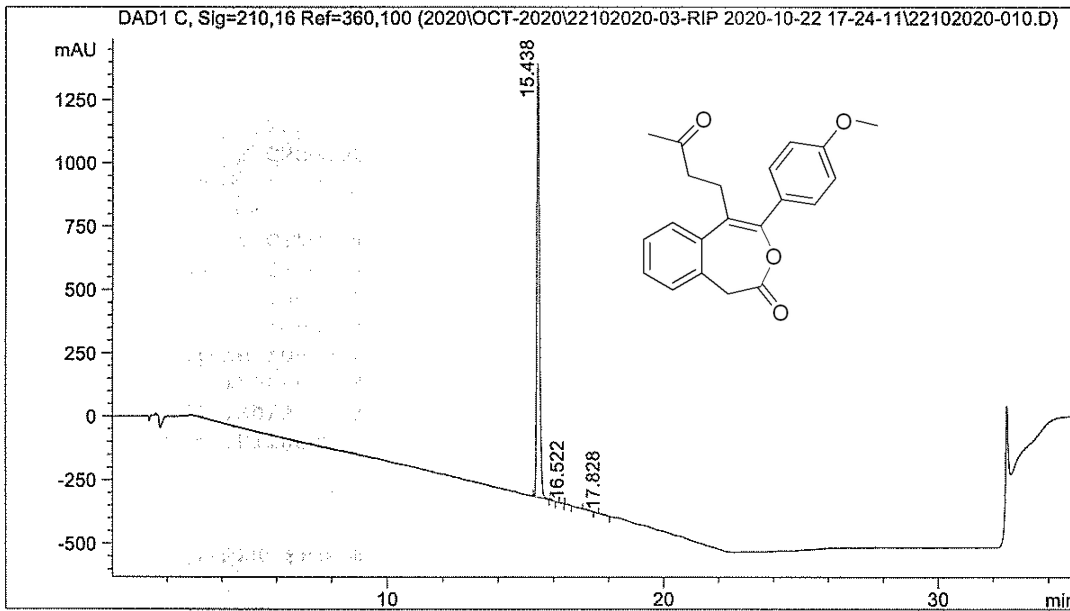

=====  
 Customized Report: Short  
 =====

```

Sorted By Signal
Calib. Data Modified : Tue, 27. Oct. 2020,11:59:11 am
Multiplier          : 1.000000
Dilution            : 1.000000
Uncalibrated Peaks  : not reported
  
```

Signal 1: DAD1 C, Sig=210,16 Ref=360,100

| Peak # | RT [min] | Type | Width [min] | Area      | Area % | Name |
|--------|----------|------|-------------|-----------|--------|------|
| 1      | 15.438   | MM   | 0.109       | 11250.293 | 98.949 |      |
| 2      | 15.942   | MM   | 0.086       | 11.605    | 0.102  |      |
| 3      | 16.282   | MM   | 0.088       | 7.970     | 0.070  |      |
| 4      | 16.522   | MM   | 0.110       | 14.495    | 0.127  |      |
| 5      | 17.248   | MM   | 0.230       | 44.642    | 0.393  |      |
| 6      | 17.828   | MM   | 0.226       | 40.729    | 0.358  |      |

**SAMPLE INFORMATION**

|                   |                            |                     |              |
|-------------------|----------------------------|---------------------|--------------|
| Sample Name:      | ILS/BTG/FPA-NM-MVK         | Acquired By:        | System       |
| A.R.Number:       | CM20J027                   | Sample Set Name:    | 26102020_01  |
| Vial:             | 9                          | Acq. Method Set:    | API ABT_M    |
| Injection #:      | 1                          | Processing Method:  | ILS PRO      |
| Injection Volume: | 5.00 ul                    | Channel Name:       | 260.0nm      |
| Run Time:         | 35.0 Minutes               | Proc. Chnl. Descr.: | PDA 260.0 nm |
| Date Acquired:    | 10/26/2020 9:40:36 PM IST  |                     |              |
| Date Processed:   | 10/27/2020 10:30:10 AM IST |                     |              |

Column: Eclipse XDB C-18 150\*4.6mm 5µm  
 Mobile phase: A) 10mM NH4OAc in water B) ACN  
 T/%B: 0/0, 20/90, 30/90, 31/5, 35/5  
 Flow: 1.0ml/min, Diluent: ACN:H2O (80:20)

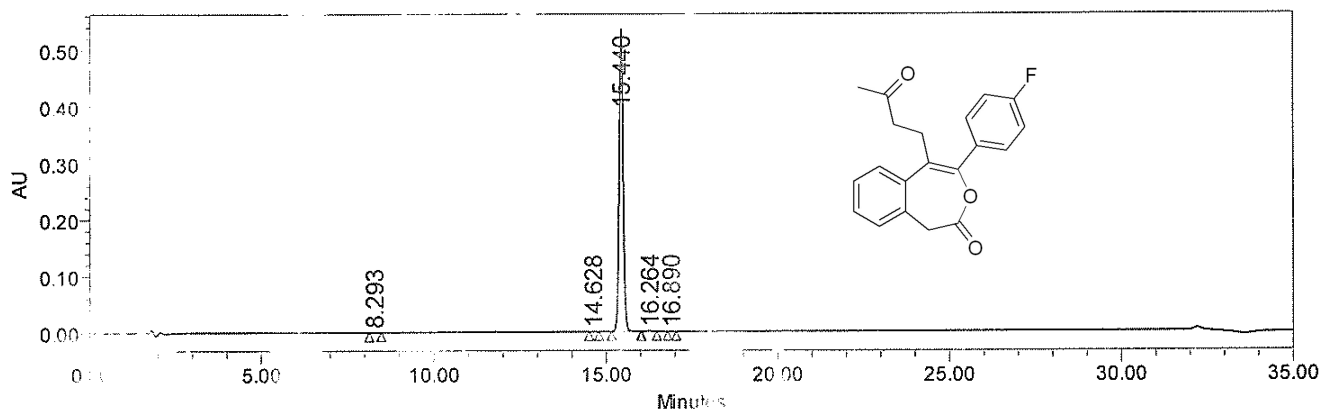

|   | RT     | Height | Area    | % Area |
|---|--------|--------|---------|--------|
| 1 | 8.293  | 165    | 1259    | 0.03   |
| 2 | 14.628 | 165    | 1338    | 0.03   |
| 3 | 15.440 | 537060 | 4058564 | 99.76  |
| 4 | 16.264 | 812    | 7346    | 0.17   |
| 5 | 16.890 | 61     | 461     | 0.01   |

*Handwritten signature*  
27/10/2020

*Handwritten signature*  
27/10/2020



**SAMPLE INFORMATION**

|                                           |                       |                     |              |
|-------------------------------------------|-----------------------|---------------------|--------------|
| Sample Name:                              | ILS-BTG-Di-FPA-NM-MMK | Acquired By:        | System       |
| A.R.Number:                               | CM201037              | Sample Set Name:    | 19092020_01  |
| Vial:                                     | 65                    | Acq. Method Set:    | API ABT_M    |
| Injection #:                              | 1                     | Processing Method:  | ILS PRO      |
| Injection Volume:                         | 10.00 ul              | Channel Name:       | 210.0nm      |
| Run Time:                                 | 35.0 Minutes          | Proc. Chnl. Descr.: | PDA 210.0 nm |
| Date Acquired: 9/19/2020 10:15:30 PM IST  |                       |                     |              |
| Date Processed: 9/21/2020 12:35:50 PM IST |                       |                     |              |

Column: Eclipse XDB C-18 150\*4.6mm 5µm  
 Mobile phase: A) 10mMNH4OAC in water B) ACN  
 T/B: 0/5, 20/90,30/90, 31/5, 35/5  
 Flow: 1.0ml/min, Diluent: ACN:H2O (80:20)

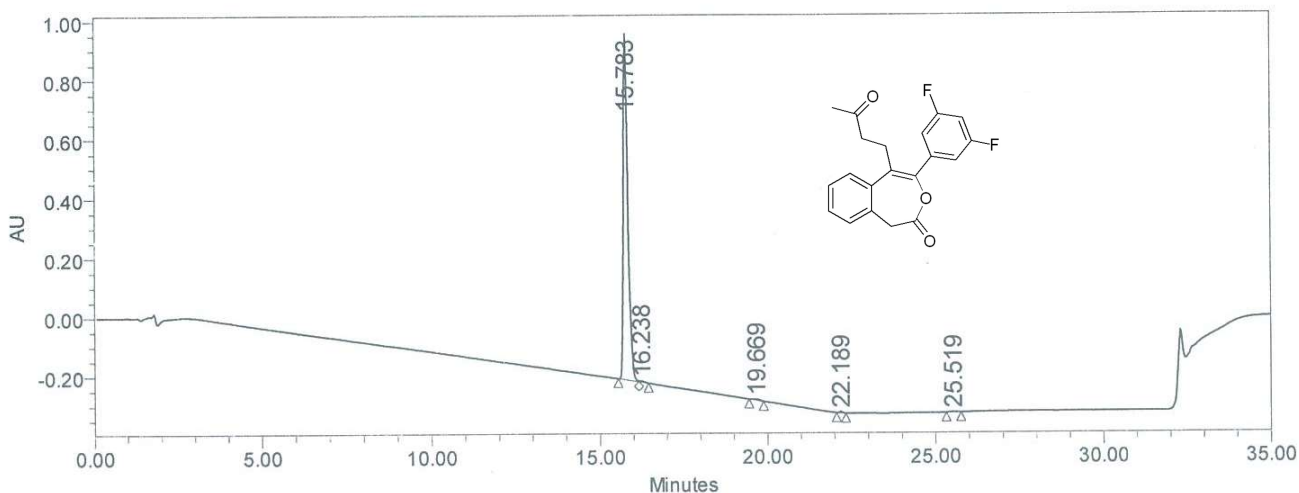

|   | RT     | Height  | Area     | % Area |
|---|--------|---------|----------|--------|
| 1 | 15.783 | 1165654 | 11150178 | 98.73  |
| 2 | 16.238 | 4325    | 44569    | 0.39   |
| 3 | 19.669 | 3691    | 51491    | 0.46   |
| 4 | 22.189 | 4431    | 29486    | 0.26   |
| 5 | 25.519 | 1300    | 17645    | 0.16   |

Analysed by

*Handwritten signature*  
21/09/2020

Checked by

*Handwritten signature*  
21/09/2020



**SAMPLE INFORMATION**

|                   |                            |                     |              |
|-------------------|----------------------------|---------------------|--------------|
| Sample Name:      | ILS-BTG-MSPA-NM-MVK        | Acquired By:        | System       |
| A.R.Number:       | CM20J018                   | Sample Set Name:    | 16102020_03  |
| Vial:             | 14                         | Acq. Method Set:    | API ABT_M    |
| Injection #:      | 1                          | Processing Method:  | ILS PRO      |
| Injection Volume: | 10.00 ul                   | Channel Name:       | 210.0nm      |
| Run Time:         | 35.0 Minutes               | Proc. Chnl. Descr.: | PDA 210.0 nm |
| Date Acquired:    | 10/16/2020 11:34:05 PM IST |                     |              |
| Date Processed:   | 10/17/2020 12:09:27 PM IST |                     |              |

Column: ECLIPSE PLUS C-18 250\*4.6mm 5µm  
 Mobile phase: A) 5mM NH4OAc in water B) ACN  
 T/%B: 0/5, 20/90,30/90, 31/5, 35/5  
 Flow: 1.0ml/min, Diluent: ACN:H2O (80:20)

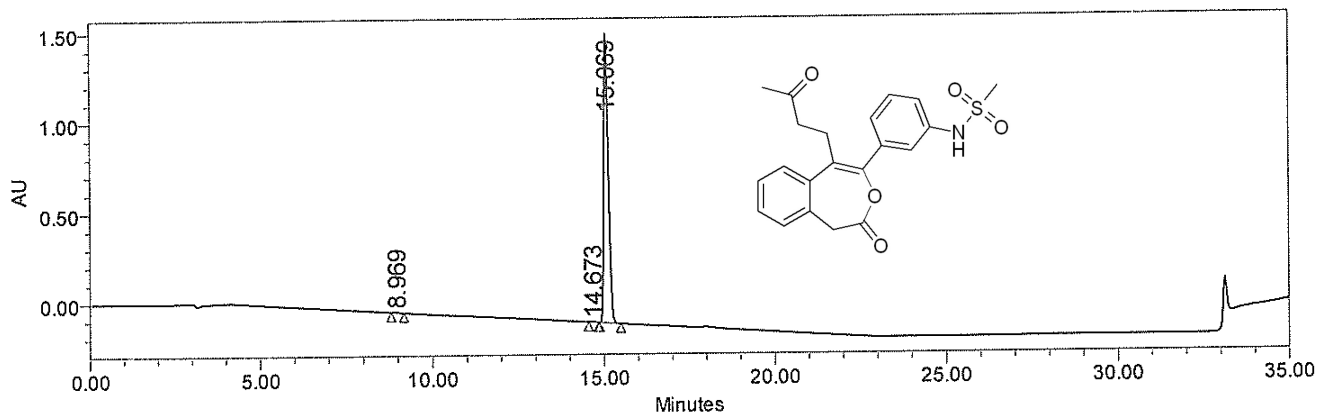

|   | RT     | Height  | Area     | % Area |
|---|--------|---------|----------|--------|
| 1 | 8.969  | 1915    | 20904    | 0.14   |
| 2 | 14.673 | 2271    | 18039    | 0.12   |
| 3 | 15.069 | 1607854 | 14731474 | 99.74  |

*Handwritten signature*  
17/10/2020

*Handwritten signature*  
17/10/2020

**SAMPLE INFORMATION**

|                                            |                      |                     |              |
|--------------------------------------------|----------------------|---------------------|--------------|
| Sample Name:                               | ILS-BTG-4MSPA-NM-MVK | Acquired By:        | System       |
| A.R.Number:                                | CM20K003             | Sample Set Name:    | 02112020_01  |
| Vial:                                      | 11                   | Acq. Method Set:    | API ABT_M    |
| Injection #:                               | 1                    | Processing Method:  | ILS PRO      |
| Injection Volume:                          | 10.00 ul             | Channel Name:       | 210.0nm      |
| Run Time:                                  | 35.0 Minutes         | Proc. Chnl. Descr.: | PDA 210.0 nm |
| Date Acquired: 11/2/2020 11:10:00 PM IST   |                      |                     |              |
| Date Processed: 11/11/2020 12:16:46 PM IST |                      |                     |              |

Column: Eclipse PLUS C-18 250\*4.6mm 5µm  
 Mobile phase: A) 0.1%TFA in water B) ACN  
 T/%B: 0/5, 20/90,28/90, 30/5, 35/5  
 Flow: 1.0ml/min, Diluent: ACN:H2O (80:20)

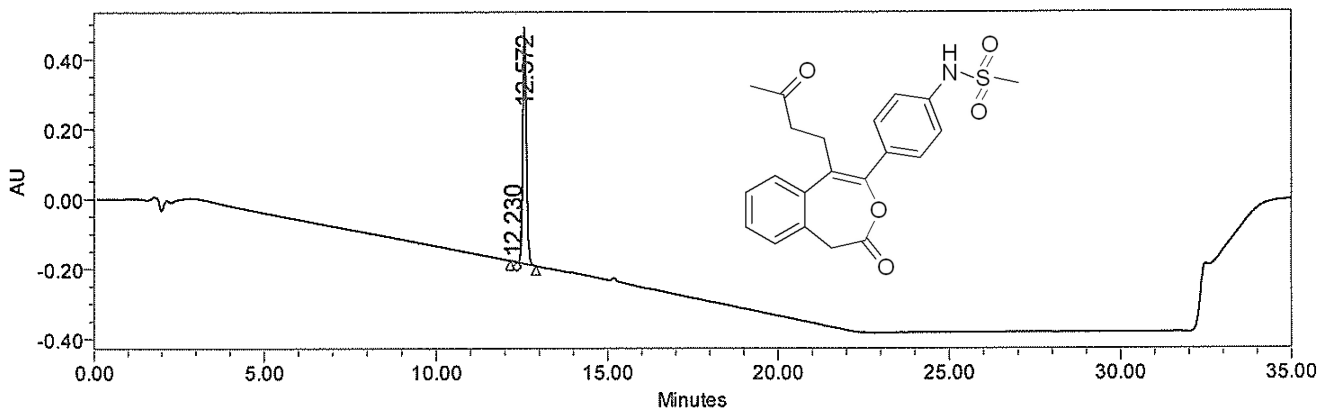

|   | RT     | Height | Area    | % Area |
|---|--------|--------|---------|--------|
| 1 | 12.230 | 1839   | 13314   | 0.26   |
| 2 | 12.572 | 677007 | 5025305 | 99.74  |

*Handwritten signature and date: 11/11/2020*

*Handwritten signature and date: 11/11/2020*

**SAMPLE INFORMATION**

|                                           |                     |                     |              |
|-------------------------------------------|---------------------|---------------------|--------------|
| Sample Name:                              | ILS-BTG-BSPA-NM-MVK | Acquired By:        | System       |
| A.R.Number:                               | CM20I038            | Sample Set Name:    | 22092020_02  |
| Vial:                                     | 81                  | Acq. Method Set:    | API ABT_M    |
| Injection #:                              | 1                   | Processing Method:  | ILS PRO      |
| Injection Volume:                         | 10.00 ul            | Channel Name:       | 210.0nm      |
| Run Time:                                 | 35.0 Minutes        | Proc. Chnl. Descr.: | PDA 210.0 nm |
| Date Acquired: 9/22/2020 8:07:34 PM IST   |                     |                     |              |
| Date Processed: 9/23/2020 10:18:30 AM IST |                     |                     |              |

Column: Eclipse XDB C-18 150\*4.6mm 5µm  
 Mobile phase: A) 10mM NH4OAC in water B) ACN  
 T7%B: 0/5, 20/90,30/90, 31/5, 35/5  
 Flow: 1.0ml/min, Diluent: ACN:H2O (80:20)

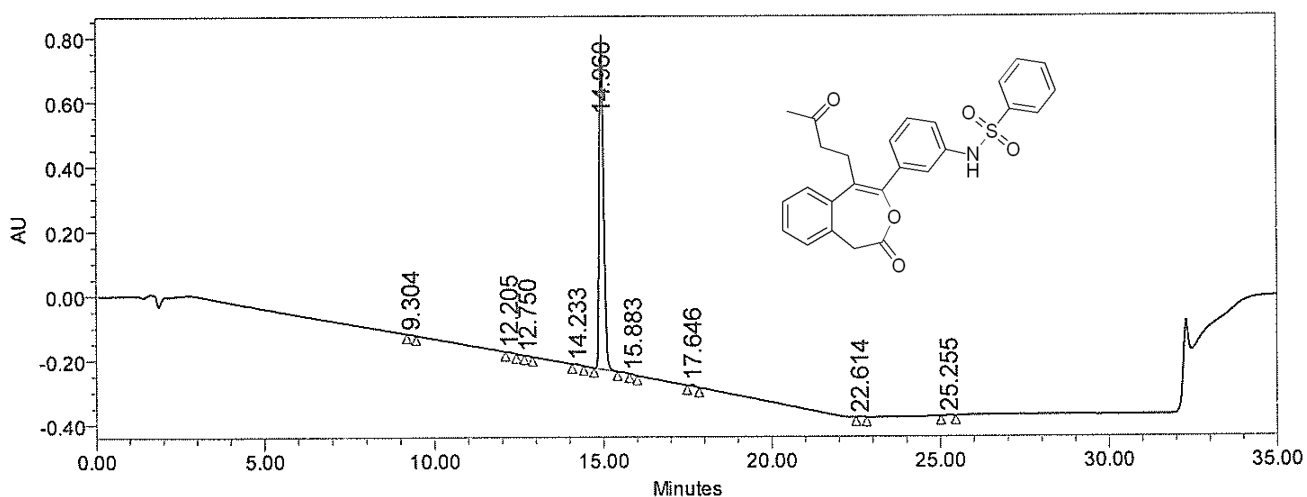

|   | RT     | Height  | Area    | % Area |
|---|--------|---------|---------|--------|
| 1 | 9.304  | 1284    | 11945   | 0.13   |
| 2 | 12.205 | 3145    | 27418   | 0.29   |
| 3 | 12.750 | 1013    | 8107    | 0.09   |
| 4 | 14.233 | 2657    | 26380   | 0.28   |
| 5 | 14.960 | 1038591 | 9191105 | 98.36  |
| 6 | 15.883 | 1043    | 6384    | 0.07   |
| 7 | 17.646 | 6329    | 53771   | 0.58   |
| 8 | 22.614 | 1041    | 7748    | 0.08   |
| 9 | 25.255 | 846     | 11717   | 0.13   |

**SAMPLE INFORMATION**

|                   |                            |                     |              |
|-------------------|----------------------------|---------------------|--------------|
| Sample Name:      | ILS/BTG/4BSPA-NM-MVK       | Acquired By:        | System       |
| A.R.Number:       | CM20J026                   | Sample Set Name:    | 26102020_01  |
| Vial:             | 8                          | Acq. Method Set:    | API ABT_M    |
| Injection #:      | 1                          | Processing Method:  | ILS PRO      |
| Injection Volume: | 5.00 ul                    | Channel Name:       | 210.0nm      |
| Run Time:         | 35.0 Minutes               | Proc. Chnl. Descr.: | PDA 210.0 nm |
| Date Acquired:    | 10/26/2020 9:01:06 PM IST  |                     |              |
| Date Processed:   | 10/27/2020 10:28:39 AM IST |                     |              |

Column: Eclipse XDB C-18 150\*4.6mm 5µm  
 Mobile phase: A) 10mM NH4OAC in water B) ACN  
 T/%B: 0/5, 20/90,30/90, 31/5, 35/5  
 Flow: 1.0ml/min, Diluent: ACN:H2O (80:20)

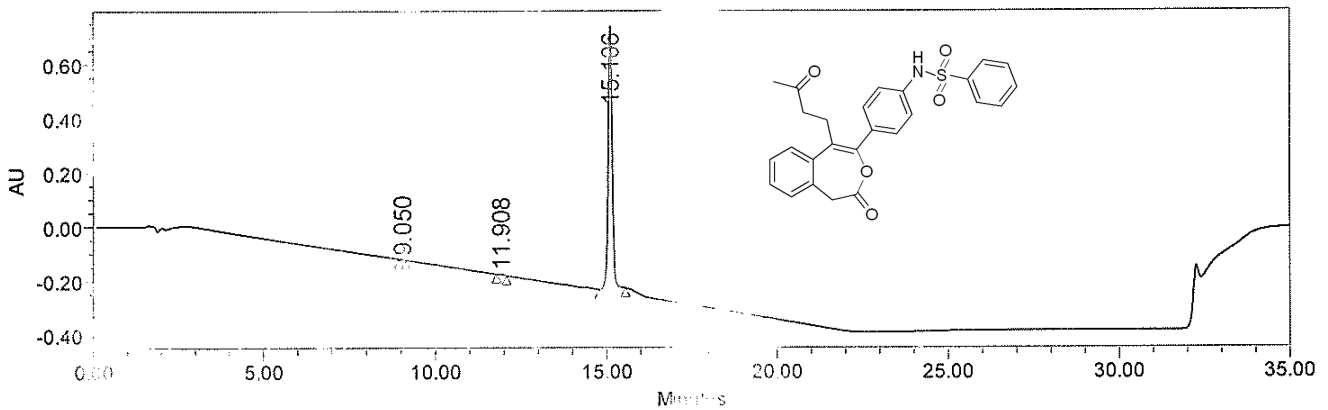

|   | RT     | Height | Area    | % Area |
|---|--------|--------|---------|--------|
| 1 | 9.050  | 917    | 6085    | 0.08   |
| 2 | 11.908 | 2673   | 22683   | 0.28   |
| 3 | 15.106 | 973331 | 8011970 | 99.64  |

*Handwritten signature*  
27/10/2020

*Handwritten signature*  
27/10/2020

## SAMPLE INFORMATION

|                   |                         |                     |                          |
|-------------------|-------------------------|---------------------|--------------------------|
| Sample Name:      | ILS-BTG-TSPA-NM-MVK     | Acquired By:        | System                   |
| Sample Type:      | Control                 | Sample Set Name     | 30092020_02              |
| Vial:             | 1:B,7                   | Acq. Method Set:    | API ABT_M                |
| Injection #:      | 1                       | Processing Method:  | ILS_PRO                  |
| Injection Volume: | 10.00 ul                | Channel Name:       | 210.0nm                  |
| Run Time:         | 35.0 Minutes            | Proc. Chnl. Descr.: | PDA Spectrum PDA210.0 nm |
| Date Acquired:    | 30-09-2020 23:30:16 IST |                     |                          |
| Date Processed:   | 01-10-2020 10:24:21 IST |                     |                          |

Column: Cosmicsil C18 150X4.6mm 5um.  
Mobile Phase: A) 10mM NH4OAC in Water B) ACN  
T%B: 0/5,20/90,30/90,31/5,35/5  
Flow:1.0 ml/min, Diluent:ACN: H2O (80:20)

## Auto-Scaled Chromatogram

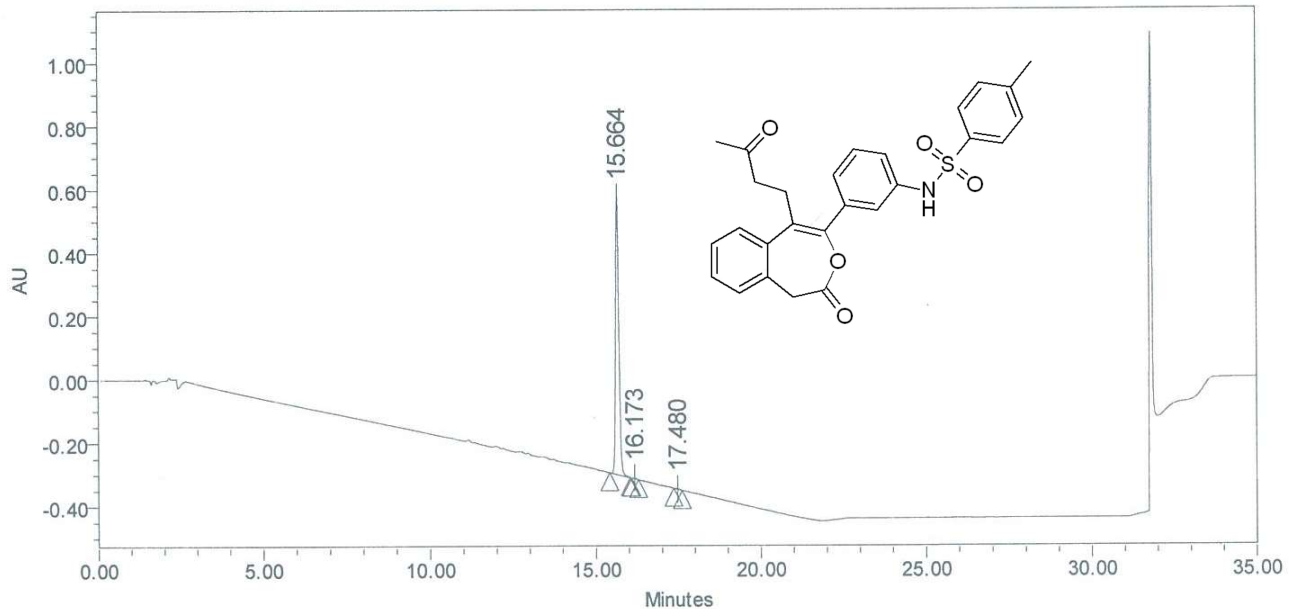

## Peak Results

|   | RT     | Height<br>( $\mu$ V) | Area    | % Area |
|---|--------|----------------------|---------|--------|
| 1 | 15.664 | 875495               | 6182257 | 99.44  |
| 2 | 16.173 | 2768                 | 16987   | 0.27   |
| 3 | 17.480 | 2096                 | 17563   | 0.28   |

Reported by User: System  
Report Method: CPRT\_Report2  
Report Method ID: 2994  
Page: 1 of 1

Project Name: 2020\SEP-2020  
Date Printed:  
01-10-2020  
10:43:24 Asia/Kolkata

*Handwritten signature*  
01/10/2020

*Handwritten signature*  
01/10/2020

SAMPLE INFORMATION

|                   |                            |                     |              |
|-------------------|----------------------------|---------------------|--------------|
| Sample Name:      | ILS-BTG-4TSPA-NM-MVK       | Acquired By:        | System       |
| A.R.Number:       | CM20J015                   | Sample Set Name:    | 16102020_03  |
| Vial:             | 11                         | Acq. Method Set:    | API ABT_M    |
| Injection #:      | 1                          | Processing Method:  | ILS PRO      |
| Injection Volume: | 10.00 ul                   | Channel Name:       | 210.0nm      |
| Run Time:         | 35.0 Minutes               | Proc. Chnl. Descr.: | PDA 210.0 nm |
| Date Acquired:    | 10/16/2020 9:38:32 PM IST  |                     |              |
| Date Processed:   | 10/17/2020 12:07:02 PM IST |                     |              |

Column: ECLIPSE PLUS C-18 250\*4.6mm 5µm  
 Mobile phase: A) 5mM NH4OAC in water B) ACN  
 T/%B: 0/5, 20/90,30/90, 31/5, 35/5  
 Flow: 1.0ml/min, Diluent: ACN:H2O (80:20)

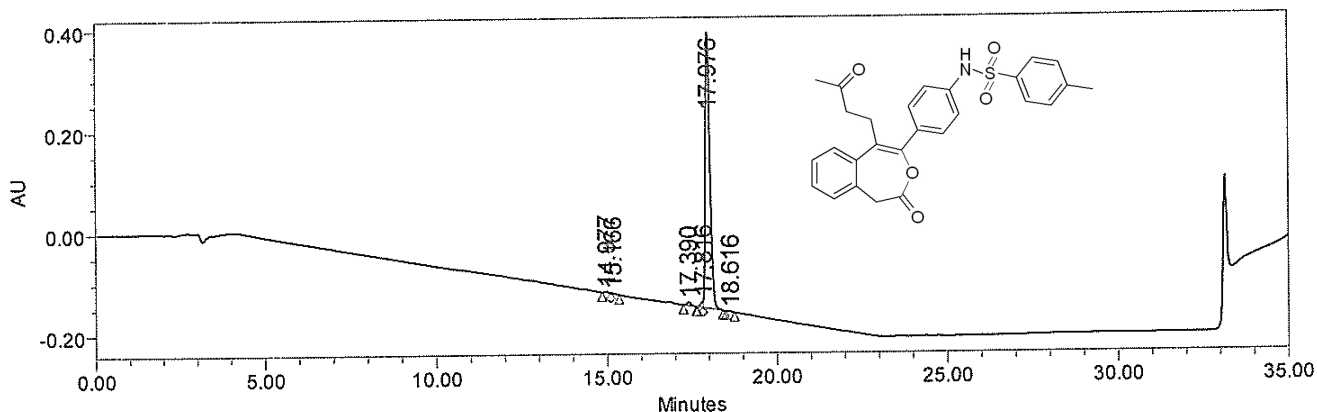

|   | RT     | Height | Area    | % Area |
|---|--------|--------|---------|--------|
| 1 | 14.977 | 3238   | 29523   | 0.57   |
| 2 | 15.166 | 1760   | 15172   | 0.29   |
| 3 | 17.390 | 6302   | 59263   | 1.14   |
| 4 | 17.816 | 12576  | 54699   | 1.05   |
| 5 | 17.976 | 544855 | 5048696 | 96.83  |
| 6 | 18.616 | 784    | 6647    | 0.13   |

*Handwritten signature*  
 17/10/2020

*Handwritten signature*  
 17/10/2020

HPLC REPORT HPLC spectra of compound 3l CPRI@DRILS

Injection Date : Mon, 12. Oct. 2020 Seq Line : 6  
 Sample Name : ILS-BTG-TPSPA-NM-MVK-1 Location : Vial 24  
 Sample Info : CM20J011 -> Inj. No. : 1  
 Inj. Vol. : 10 µl

Acq. Method : C:\Chem32\1\DATA\2020\OCT-2020\12102020-02-ABT 2020-->  
 Analysis Method : C:\CHEM32\1\METHODS\API ABT\_M.M  
 Last Changed : Tue, 13. Oct. 2020, 11:00:53 am  
 (modified after loading)

Column : X-Bridge C18 150\*4.6mm 3.5µm  
 Mobile phase: A) 10mM NH4OAC in H2O B) ACN  
 T/B% : 0/5, 20/90, 30/90, 31/5, 35/5  
 Flow: 1.0mL/min , Diluent: ACN:H2O (80:20)

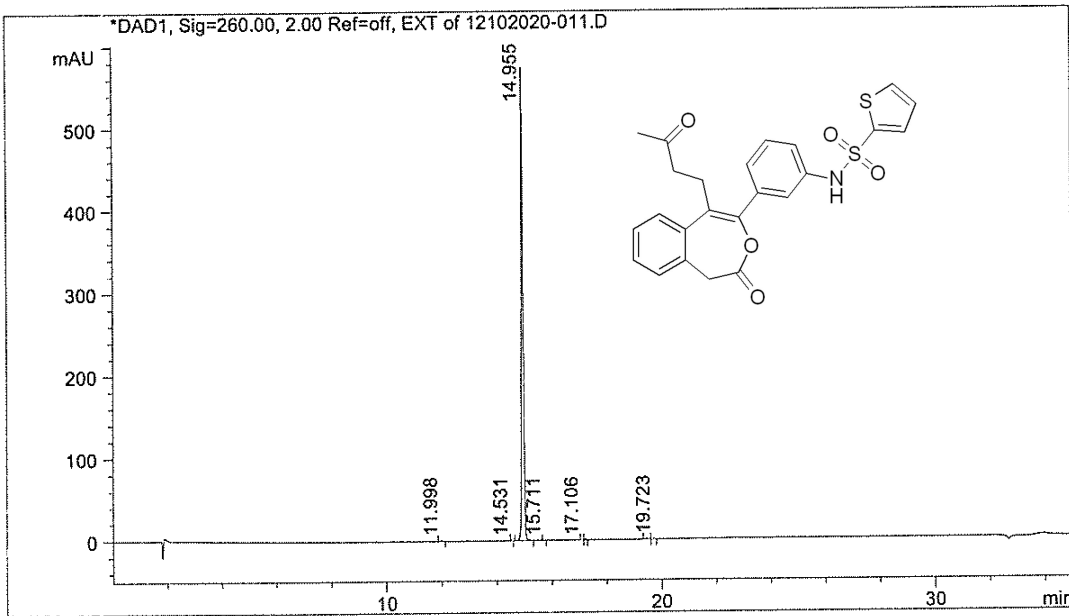

Customized Report: Short

Sorted By Signal

Calib. Data Modified : Tue, 13. Oct. 2020, 11:00:52 am  
 Multiplier : 1.000000  
 Dilution : 1.000000  
 Uncalibrated Peaks : not reported

Signal 1: DAD1, Sig=260.00, 2.00 Ref=off, EXT

| Peak # | RT [min] | Type | Width [min] | Area     | Area % | Name |
|--------|----------|------|-------------|----------|--------|------|
| 1      | 11.998   | MM   | 0.083       | 7.436    | 0.287  |      |
| 2      | 14.531   | MM   | 0.068       | 0.601    | 0.023  |      |
| 3      | 14.955   | MM   | 0.074       | 2570.054 | 99.156 |      |
| 4      | 15.711   | MM   | 0.064       | 0.959    | 0.037  |      |
| 5      | 17.106   | MF   | 0.063       | 0.792    | 0.031  |      |
| 6      | 17.213   | FM   | 0.069       | 4.144    | 0.160  |      |
| 7      | 19.441   | MM   | 0.091       | 4.804    | 0.185  |      |
| 8      | 19.723   | MM   | 0.079       | 3.137    | 0.121  |      |

**SAMPLE INFORMATION**

|                   |                         |                     |                           |
|-------------------|-------------------------|---------------------|---------------------------|
| Sample Name:      | ILS/BTG/4TPSPA/NM/MVK   | Acquired By:        | System                    |
| Sample Type:      | Unknown                 | Sample Set Name     | 02112020_02               |
| Vial:             | 1:A,6                   | Acq. Method Set:    | API LAR_M                 |
| Injection #:      | 1                       | Processing Method:  | ILS PRO                   |
| Injection Volume: | 5.00 ul                 | Channel Name:       | 210.0nm                   |
| Run Time:         | 35.0 Minutes            | Proc. Chnl. Descr.: | PDA Spectrum PDA 210.0 nm |
| Date Acquired:    | 03-11-2020 20:30:52 IST |                     |                           |
| Date Processed:   | 04-11-2020 10:46:22 IST |                     |                           |

Column: Eclipse PLUS C18 250X4.6mm 5um.  
 mobile Phase: A) 0.1% TFA in Water B) ACN  
 T%B: 0/5,20/90,28/90,30/5,35/5  
 Flow: 1.0 ml/min, Diluent: ACN:H2O(80:20)

**Auto-Scaled Chromatogram**

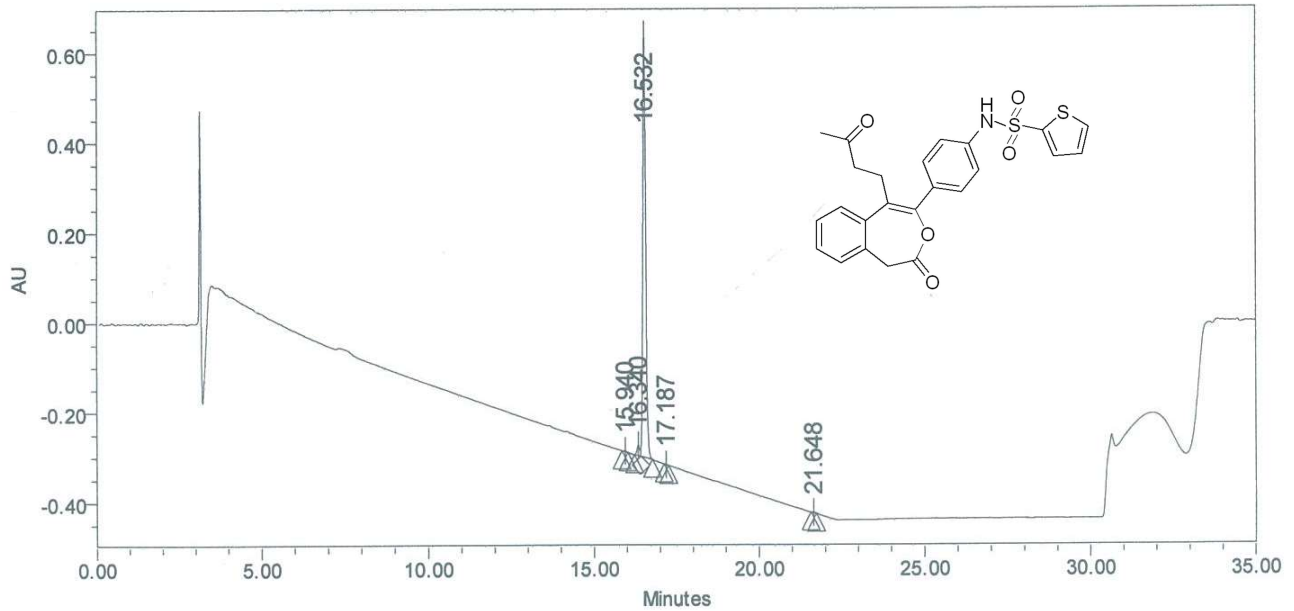

**Peak Results**

|   | RT     | Height (µV) | Area    | % Area | Name |
|---|--------|-------------|---------|--------|------|
| 1 | 15.940 | 2101        | 10814   | 0.18   |      |
| 2 | 16.340 | 22505       | 134110  | 2.28   |      |
| 3 | 16.532 | 943251      | 5719337 | 97.35  |      |
| 4 | 17.187 | 820         | 3605    | 0.06   |      |
| 5 | 21.648 | 1440        | 7407    | 0.13   |      |

*Handwritten signature*  
04/11/2020

*Handwritten signature*



**SAMPLE INFORMATION**

|                   |                            |                     |              |
|-------------------|----------------------------|---------------------|--------------|
| Sample Name:      | ILS-BTG-MTSPA-NM-MVK       | Acquired By:        | System       |
| Sample Type:      | Unknown <i>cm2020</i>      | Sample Set Name:    | 29102020_01  |
| Vial:             | 34                         | Acq. Method Set:    | API ABT_M    |
| Injection #:      | 1                          | Processing Method:  | ILS PROC     |
| Injection Volume: | 10.00 ul                   | Channel Name:       | 210.0nm      |
| Run Time:         | 35.0 Minutes               | Proc. Chnl. Descr.: | PDA 210.0 nm |
| Date Acquired:    | 10/30/2020 12:06:59 AM IST |                     |              |
| Date Processed:   | 10/30/2020 11:32:32 AM IST |                     |              |

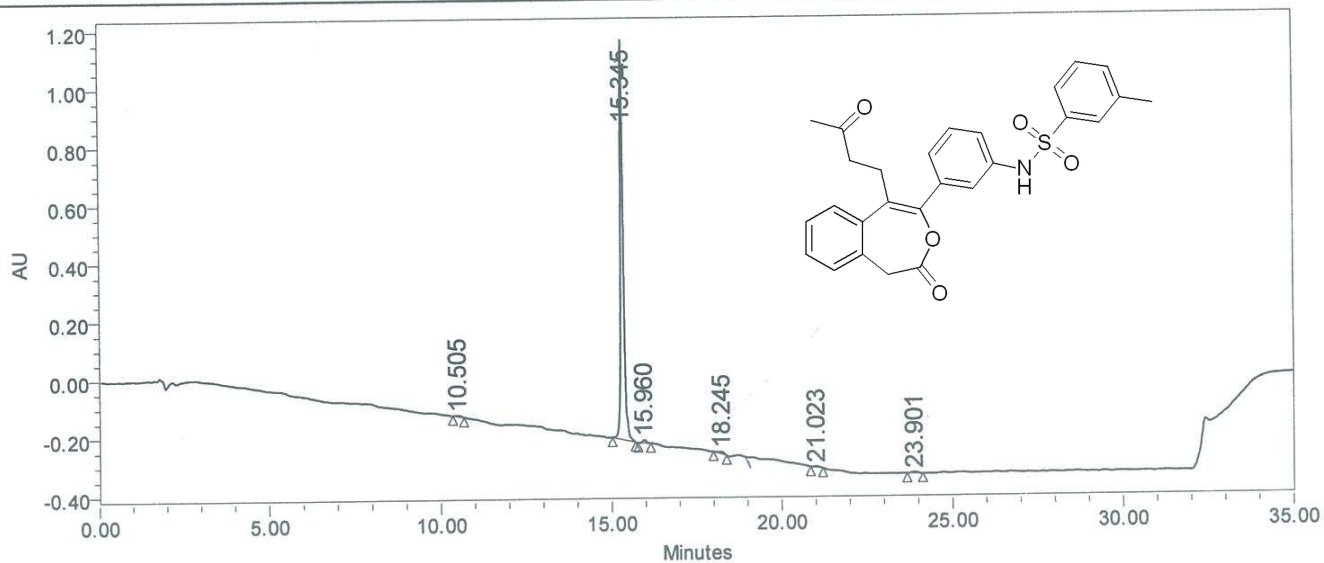

|   | RT     | Height  | Area    | % Area |
|---|--------|---------|---------|--------|
| 1 | 10.505 | 4200    | 44693   | 0.51   |
| 2 | 15.345 | 1363127 | 8417857 | 96.75  |
| 3 | 15.960 | 10129   | 76197   | 0.88   |
| 4 | 18.245 | 7215    | 77844   | 0.89   |
| 5 | 21.023 | 3565    | 35055   | 0.40   |
| 6 | 23.901 | 4262    | 48757   | 0.56   |

Method Information:-

Column:- Eclipse XDB C18 150x4.6mm 5um

M.P: A) 10mm NH<sub>4</sub>OAc B) ACN

T/1.B: 0/5, 20/90, 30/90, 31/5, 35/5

flow:- 1.0mL/min; Diluent:- ACN:H<sub>2</sub>O (50/20)

*Handwritten signature*  
30/10/2020

*Handwritten signature*  
Kp  
Solomon

SAMPLE INFORMATION

|                   |                             |                     |              |
|-------------------|-----------------------------|---------------------|--------------|
| Sample Name:      | ILS/BTG/PANMWA <sup>c</sup> | Acquired By:        | System       |
| A.R.Number:       | MC20C020                    | Sample Set Name:    | 14032020_01  |
| Vial:             | 35                          | Acq. Method Set:    | API ABT_M    |
| Injection #:      | 1                           | Processing Method:  | ABT PRO      |
| Injection Volume: | 5.00 ul                     | Channel Name:       | 210.0nm      |
| Run Time:         | 35.0 Minutes                | Proc. Chnl. Descr.: | PDA 210.0 nm |
| Date Acquired:    | 3/14/2020 8:39:32 PM IST    |                     |              |
| Date Processed:   | 3/16/2020 10:04:20 AM IST   |                     |              |

Column: EClipse XDB C-18 150\*4.6mm 5µm  
 Mobile phase: A) 0.1% TFA in water B) ACN  
 T/%B: 0/5, 20/90,30/90, 31/5, 35/5  
 Flow: 1.0ml/min, Diluent: ACN:H2O (80:20)

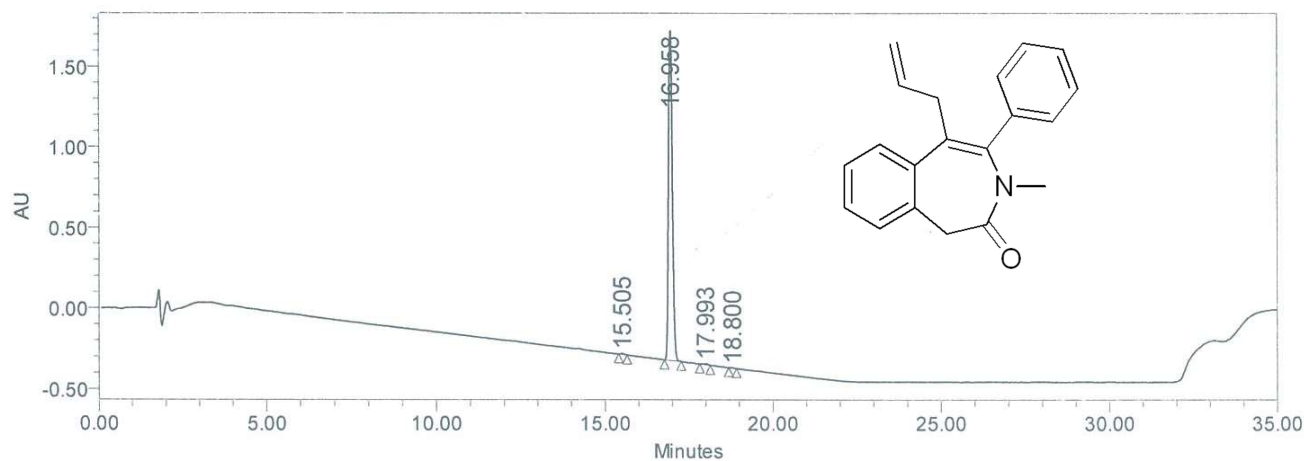

|   | RT     | Height  | Area     | % Area |
|---|--------|---------|----------|--------|
| 1 | 15.505 | 6425    | 46837    | 0.28   |
| 2 | 16.958 | 2066018 | 16322237 | 99.30  |
| 3 | 17.993 | 5957    | 50857    | 0.31   |
| 4 | 18.800 | 2490    | 17536    | 0.11   |

Analysed by

*M. Renuka*  
16/03/2020

Checked by

*Rep*  
16/03/2020

SAMPLE INFORMATION

|                   |                           |                     |                 |
|-------------------|---------------------------|---------------------|-----------------|
| Sample Name:      | ILS-BTG-N-Eth-AL          | Acquired By:        | System          |
| A.R.Number:       | CM21G14                   | Sample Set Name:    | 23072021_01 ILS |
| Vial:             | 2                         | Acq. Method Set:    | API ABT_M       |
| Injection #:      | 1                         | Processing Method:  | ILS PROCE       |
| Injection Volume: | 10.00 ul                  | Channel Name:       | 210.0nm         |
| Run Time:         | 35.0 Minutes              | Proc. Chnl. Descr.: | PDA 210.0 nm    |
| Date Acquired:    | 7/23/2021 11:42:36 AM IST |                     |                 |
| Date Processed:   | 7/23/2021 1:13:55 PM IST  |                     |                 |

Column: Eclipse XDB C-18 150\*4.6mm 5m  
 Mobile phase: A) 10mM Ammonium Acetate in Water B) ACN  
 T/%B: 0/5,20/90,30/90,31/5,35/5  
 Flow: 1.0ml/min Diluent:ACN:H2O(80:20)

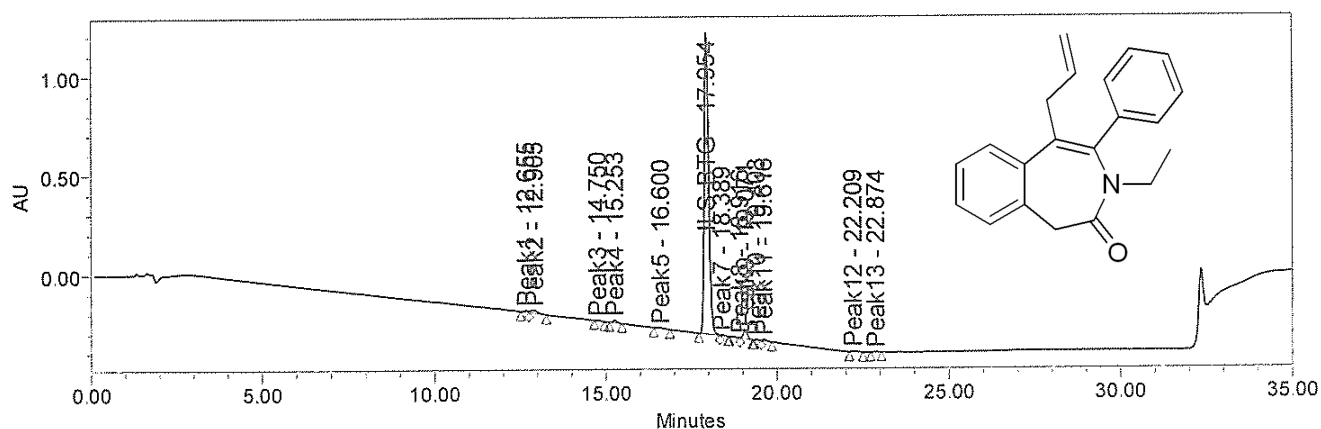

|    | Peak Name | RT     | Height  | Area     | % Area | RT Ratio |
|----|-----------|--------|---------|----------|--------|----------|
| 1  | Peak1     | 12.655 | 9339    | 79881    | 0.54   | 0.70     |
| 2  | Peak2     | 12.905 | 15798   | 222684   | 1.50   | 0.72     |
| 3  | Peak3     | 14.750 | 1839    | 18538    | 0.13   | 0.82     |
| 4  | Peak4     | 15.253 | 12807   | 113180   | 0.76   | 0.85     |
| 5  | Peak5     | 16.600 | 3030    | 40248    | 0.27   | 0.92     |
| 6  | ILS-BTG   | 17.954 | 1518922 | 13748187 | 92.84  | 1.00     |
| 7  | Peak7     | 18.389 | 3834    | 35076    | 0.24   | 1.02     |
| 8  | Peak8     | 18.916 | 2892    | 32264    | 0.22   | 1.05     |
| 9  | Peak9     | 19.071 | 38096   | 351157   | 2.37   | 1.06     |
| 10 | Peak10    | 19.403 | 2635    | 25746    | 0.17   | 1.08     |

**SAMPLE INFORMATION**

|                                           |                   |                     |              |
|-------------------------------------------|-------------------|---------------------|--------------|
| Sample Name:                              | ILS/BTG/TPA-NM-AL | Acquired By:        | System       |
| A.R.Number:                               | MA20K009          | Sample Set Name:    | 12112020_01  |
| Vial:                                     | 28                | Acq. Method Set:    | API LAR_M    |
| Injection #:                              | 1                 | Processing Method:  | ILS PRO      |
| Injection Volume:                         | 5.00 ul           | Channel Name:       | 210.0nm      |
| Run Time:                                 | 35.0 Minutes      | Proc. Chnl. Descr.: | PDA 210.0 nm |
| Date Acquired: 11/12/2020 3:22:02 PM IST  |                   |                     |              |
| Date Processed: 11/12/2020 4:31:22 PM IST |                   |                     |              |

Column: Eclipse PLUS C-18 250\*4.6mm 5µm  
 Mobile phase: A) 0.1%TFA in water B) ACN  
 T%B: 0/5, 20/90,28/90, 30/5, 35/5  
 Flow: 1.0ml/min, Diluent: ACN:H2O (80:20)

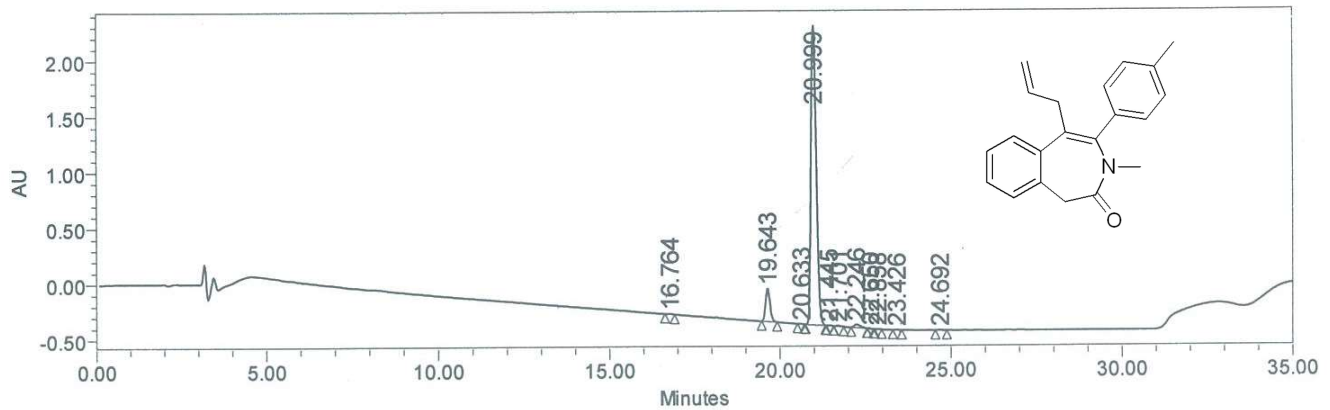

|    | RT     | Height  | Area     | % Area |
|----|--------|---------|----------|--------|
| 1  | 16.764 | 4635    | 35295    | 0.11   |
| 2  | 19.643 | 294538  | 2664220  | 8.24   |
| 3  | 20.633 | 1387    | 9192     | 0.03   |
| 4  | 20.999 | 2673038 | 29124339 | 90.04  |
| 5  | 21.445 | 3800    | 25863    | 0.08   |
| 6  | 21.701 | 5230    | 45917    | 0.14   |
| 7  | 22.246 | 30117   | 391267   | 1.21   |
| 8  | 22.650 | 1174    | 6673     | 0.02   |
| 9  | 22.858 | 1200    | 9325     | 0.03   |
| 10 | 23.426 | 2322    | 18653    | 0.06   |
| 11 | 24.692 | 1563    | 15469    | 0.05   |

*[Handwritten signature]*



SAMPLE INFORMATION

|                   |                         |                     |                           |
|-------------------|-------------------------|---------------------|---------------------------|
| Sample Name:      | ILS-NTG-MPA-NM-AL       | Acquired By:        | System                    |
| Sample Type:      | Unknown                 | Sample Set Name:    | 16032020_03               |
| Vial:             | 1:A,8                   | Acq. Method Set:    | ABT_M                     |
| Injection #:      | 1                       | Processing Method:  | ILS_PRO                   |
| Injection Volume: | 5.00 ul                 | Channel Name:       | 210.0nm                   |
| Run Time:         | 35.0 Minutes            | Proc. Chnl. Descr.: | PDA Spectrum PDA 210.0 nm |
| Date Acquired:    | 16-03-2020 23:21:30 IST |                     |                           |
| Date Processed:   | 17-03-2020 17:30:34 IST |                     |                           |

Column: Eclipse plus C18 250X4.6mm 5um.  
 Mobile Phase: A) 5mM NH4OAC in Water B) ACN  
 T%B: 0/5,20/90,30/90,31/5,35/5  
 Flow: 1.0 ml/min, Diluent: ACN: H2O (80:20)

Auto-Scaled Chromatogram

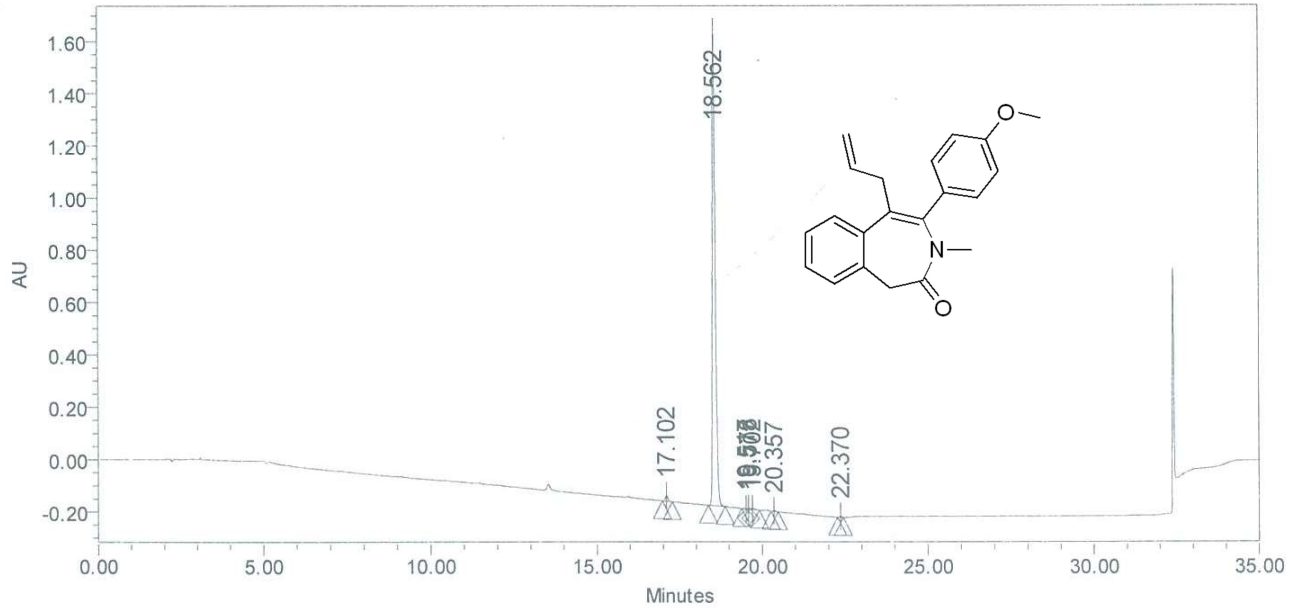

Peak Results

|   | RT     | Height (µV) | Area     | % Area |
|---|--------|-------------|----------|--------|
| 1 | 17.102 | 20654       | 114824   | 1.01   |
| 2 | 18.562 | 1822334     | 11092695 | 98.01  |
| 3 | 19.517 | 1881        | 8925     | 0.08   |
| 4 | 19.578 | 4568        | 25777    | 0.23   |
| 5 | 19.702 | 5336        | 38459    | 0.34   |
| 6 | 20.357 | 3505        | 18626    | 0.16   |

|   | RT     | Height (µV) | Area  | % Area |
|---|--------|-------------|-------|--------|
| 7 | 22.370 | 5167        | 18636 | 0.16   |

*home*  
17/03/2020

*dep*  
17/03/2020

SAMPLE INFORMATION

|                   |                         |                     |                           |
|-------------------|-------------------------|---------------------|---------------------------|
| Sample Name:      | ILS/BTG/FPA/NM/AL       | Acquired By:        | System                    |
| Sample Type:      | Unknown                 | Sample Set Name:    | 15092020_01               |
| Vial:             | 1:A,6                   | Acq. Method Set:    | API SVL_M                 |
| Injection #:      | 1                       | Processing Method:  | ILS_PRO                   |
| Injection Volume: | 5.00 ul                 | Channel Name:       | 210.0nm                   |
| Run Time:         | 30.0 Minutes            | Proc. Chnl. Descr.: | PDA Spectrum PDA 210.0 nm |
| Date Acquired:    | 15-09-2020 18:01:35 IST |                     |                           |
| Date Processed:   | 16-09-2020 09:07:39 IST |                     |                           |

Column: X-Terra C18 250X4.6mm 5um.  
 Mobile Phase: A) 0.05% TFA IN WATER in Water B)0.05% TFA IN ACN  
 T%B: 0/2,5/2,20/90,25/90,26/2,30/2  
 Flow:1.0 ml/min, Diluent:ACN:H2O(10:90)

Auto-Scaled Chromatogram

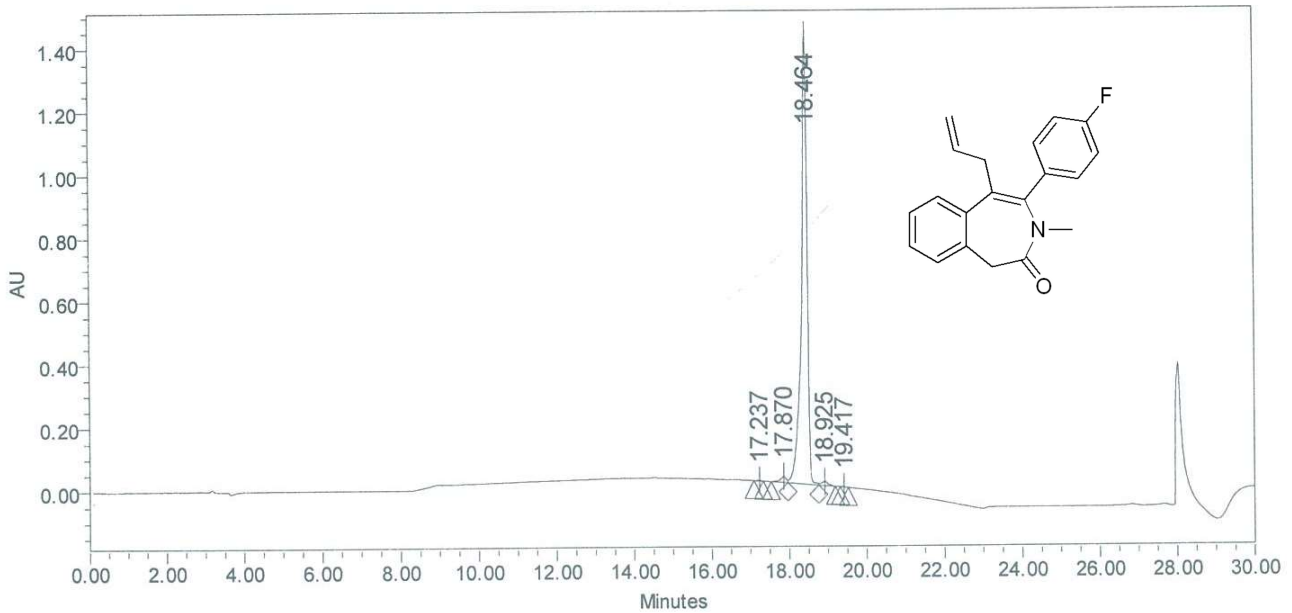

Peak Results

|   | RT     | Height (μV) | Area     | % Area |
|---|--------|-------------|----------|--------|
| 1 | 17.237 | 1732        | 14604    | 0.10   |
| 2 | 17.870 | 20212       | 200379   | 1.35   |
| 3 | 18.464 | 1421930     | 14435076 | 97.43  |
| 4 | 18.925 | 13511       | 156791   | 1.06   |
| 5 | 19.417 | 1312        | 8426     | 0.06   |

*Handwritten signature and date: 16/09/2020*

**SAMPLE INFORMATION**

|                   |                          |                     |              |
|-------------------|--------------------------|---------------------|--------------|
| Sample Name:      | ILS-BTG-Di-FPA-NM-AL     | Acquired By:        | System       |
| A.R.Number:       | CM20I024                 | Sample Set Name:    | 16092020_02  |
| Vial:             | 7                        | Acq. Method Set:    | API BIC_M    |
| Injection #:      | 1                        | Processing Method:  | ILS PRO      |
| Injection Volume: | 10.00 ul                 | Channel Name:       | 210.0nm      |
| Run Time:         | 35.0 Minutes             | Proc. Chnl. Descr.: | PDA 210.0 nm |
| Date Acquired:    | 9/16/2020 9:27:30 PM IST |                     |              |
| Date Processed:   | 9/17/2020 9:46:48 AM IST |                     |              |

Column: ECLIPSE PLUS C-18 250\*4.6mm 5µm  
 Mobile phase: A) 0.05% TFA in water B) 0.05% TFA in ACN  
 T/%B: 0/5,20/90,30/90,31/5,35/5  
 Flow: 1.0ml/min, Diluent: ACN:H2O(80:20)

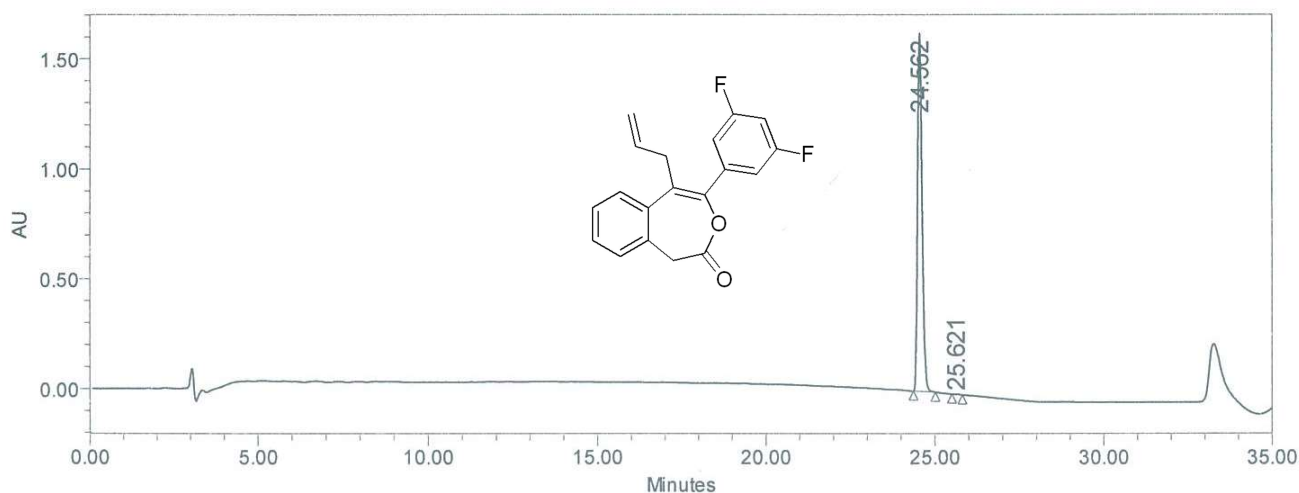

|   | RT     | Height  | Area     | % Area |
|---|--------|---------|----------|--------|
| 1 | 24.562 | 1629673 | 15250747 | 99.90  |
| 2 | 25.621 | 1407    | 15404    | 0.10   |

Analysed by

*[Handwritten signature]*  
17/09/2020

Checked by

HPLC REPORT HPLC spectra of compound 4f CPRI@DRILS

Injection Date : Wed, 7. Oct. 2020 Seq Line : 5  
 Sample Name : ILS-BTG-MSPA-AL Location : Vial 23  
 Sample Info : CM20J007 -> Inj. No. : 1  
 Inj. Vol. : 10 µl

Acq. Method : C:\Chem32\1\DATA\2020\OCT-2020\07102020-03-ABT 2020-->  
 Analysis Method : C:\CHEM32\1\METHODS\API ABT\_M.M  
 Last Changed : Thu, 8. Oct. 2020, 10:49:08 am  
 (modified after loading)

Column : Cosmicsil Aura ODS 150\*4.6mm 5µm  
 Mobile phase: A) 10mM NH4OAC in H2O B) ACN  
 T/B% : 0/5,20/90,30/90,31/5,35/5  
 Flow:1.0mL/min ,Diluent: ACN:H2O(80:20)

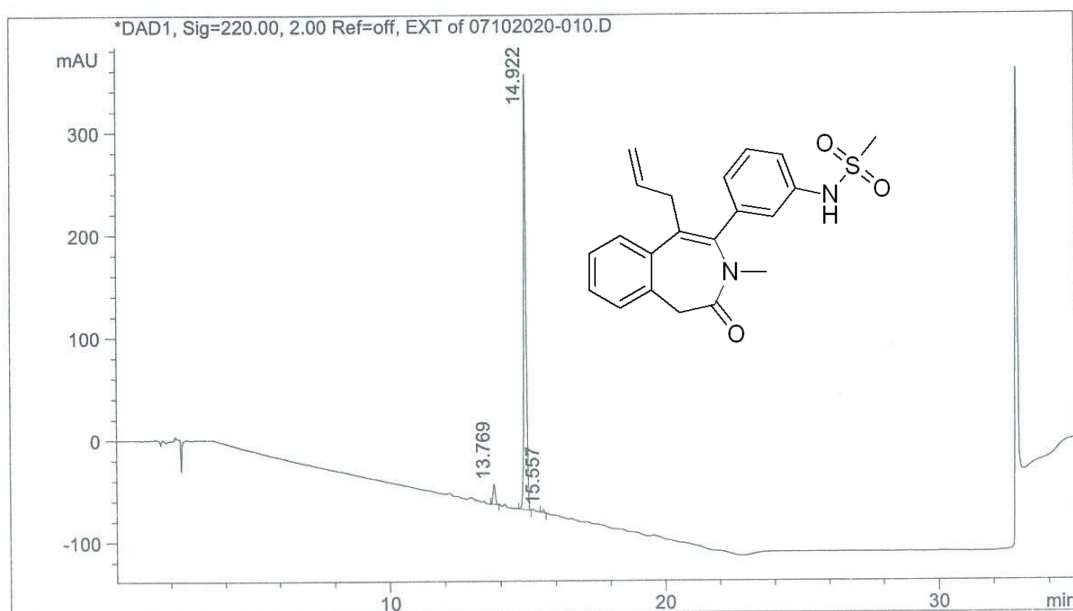

Customized Report: Short

Sorted By Signal  
 Calib. Data Modified : Thu, 8. Oct. 2020, 10:49:08 am  
 Multiplier : 1.000000  
 Dilution : 1.000000  
 Uncalibrated Peaks : not reported

Signal 1: DAD1, Sig=220.00, 2.00 Ref=off, EXT

| Peak # | RT [min] | Type | Width [min] | Area     | Area % | Name |
|--------|----------|------|-------------|----------|--------|------|
| 1      | 13.769   | MM   | 0.094       | 110.564  | 4.324  |      |
| 2      | 14.922   | MM   | 0.095       | 2431.405 | 95.089 |      |
| 3      | 15.557   | MM   | 0.092       | 15.014   | 0.587  |      |

\*\*\* End of Report \*\*\*

*Handwritten signature*  
08/10/2020

*Handwritten signature*  
08/10/2020



**SAMPLE INFORMATION**

|                   |                            |                     |              |
|-------------------|----------------------------|---------------------|--------------|
| Sample Name:      | ILS-BTG-4MSPA-NM-AL        | Acquired By:        | System       |
| A.R. Number:      | CM20J033                   | Sample Set Name:    | 02112020_01  |
| Vial:             | 7                          | Acq. Method Set:    | API ABT_M    |
| Injection #:      | 1                          | Processing Method:  | ILS PRO      |
| Injection Volume: | 10.00 ul                   | Channel Name:       | 210.0nm      |
| Run Time:         | 35.0 Minutes               | Proc. Chnl. Descr.: | PDA 210.0 nm |
| Date Acquired:    | 11/2/2020 8:35:55 PM IST   |                     |              |
| Date Processed:   | 11/11/2020 12:15:09 PM IST |                     |              |

Column: Eclipse PLUS C-18 250\*4.6mm 5µm  
 Mobile phase: A) 0.1%TFA in water B) ACN  
 T/%B: 0/5, 20/90,28/90, 30/5, 35/5  
 Flow: 1.0ml/min, Diluent: ACN:H2O (80:20)

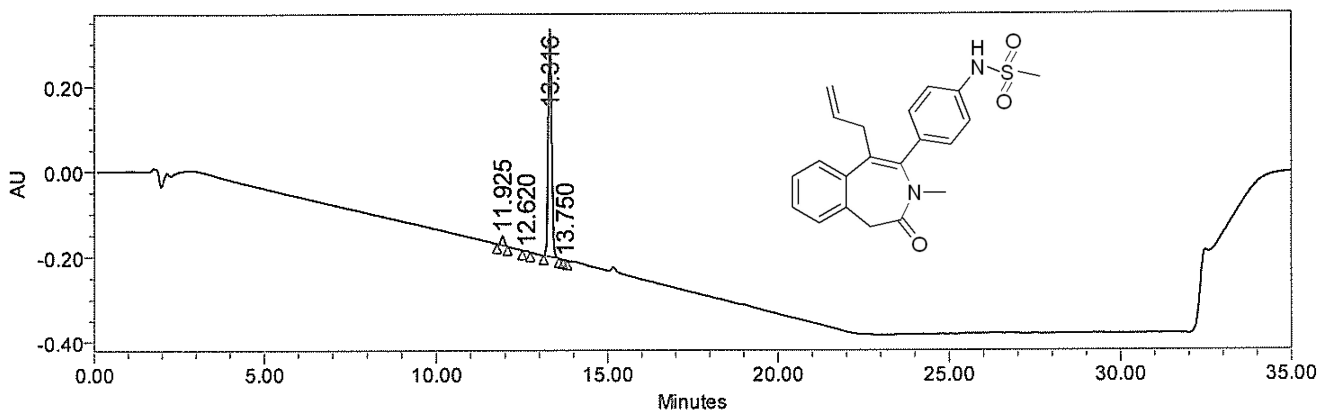

|   | RT     | Height | Area    | % Area |
|---|--------|--------|---------|--------|
| 1 | 11.925 | 21548  | 144846  | 3.76   |
| 2 | 12.620 | 2051   | 13316   | 0.35   |
| 3 | 13.316 | 530712 | 3694679 | 95.84  |
| 4 | 13.750 | 522    | 2386    | 0.06   |

*[Handwritten Signature]*  
 11/11/2020

*[Handwritten Signature]*  
 11/11/2020

**SAMPLE INFORMATION**

|                                           |                    |                     |              |
|-------------------------------------------|--------------------|---------------------|--------------|
| Sample Name:                              | ILS-BTG-BSPA-NM-AL | Acquired By:        | System       |
| A.R.Number:                               | CM201045           | Sample Set Name:    | 29092020_02  |
| Vial:                                     | 84                 | Acq. Method Set:    | API ABT_M    |
| Injection #:                              | 1                  | Processing Method:  | ILS PRO      |
| Injection Volume:                         | 10.00 ul           | Channel Name:       | 210.0nm      |
| Run Time:                                 | 35.0 Minutes       | Proc. Chnl. Descr.: | PDA 210.0 nm |
| Date Acquired: 9/30/2020 12:23:22 AM IST  |                    |                     |              |
| Date Processed: 9/30/2020 10:21:07 AM IST |                    |                     |              |

Column: ECLIPSE PLUS C-18 250\*4.6mm 5µm  
 Mobile phase: A) 0.05% TFA in water B) 0.05% TFA in ACN  
 T/B: 0/5,20/90,30/90,31/5,35/5  
 Flow: 1.0ml/min, Diluent: ACN:H2O(80:20)

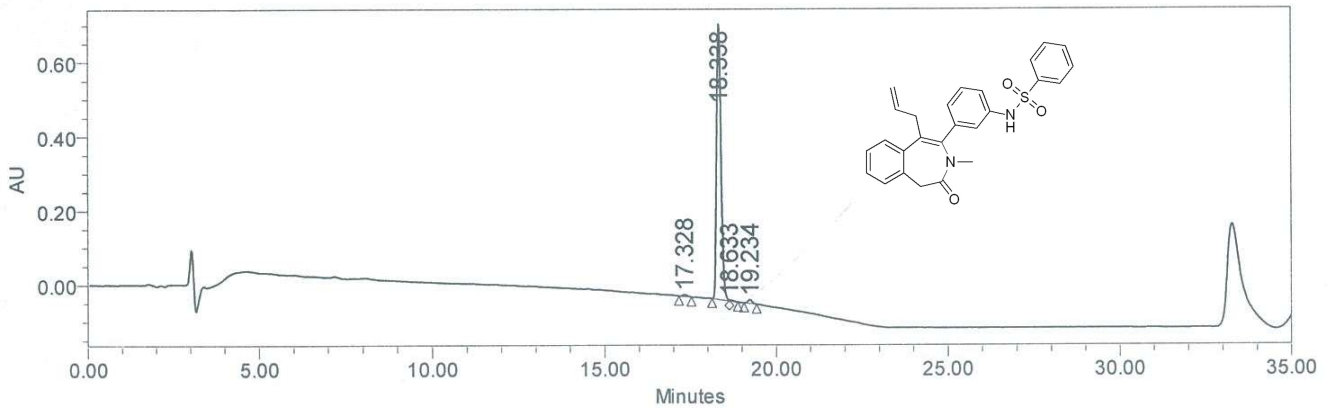

|   | RT     | Height | Area    | % Area |
|---|--------|--------|---------|--------|
| 1 | 17.328 | 4968   | 42320   | 0.62   |
| 2 | 18.338 | 743080 | 6690538 | 97.81  |
| 3 | 18.633 | 2923   | 20101   | 0.29   |
| 4 | 19.234 | 10027  | 87725   | 1.28   |

*Handwritten signature*  
30/09/2020

*Handwritten signature*  
30/09/2020

**SAMPLE INFORMATION**

|                   |                            |                     |              |
|-------------------|----------------------------|---------------------|--------------|
| Sample Name:      | ILS-BTG-4BSPA-NM-AL        | Acquired By:        | System       |
| A.R.Number:       | CM20J016                   | Sample Set Name:    | 16102020_03  |
| Vial:             | 12                         | Acq. Method Set:    | API ABT_M    |
| Injection #:      | 1                          | Processing Method:  | ILS PRO      |
| Injection Volume: | 10.00 ul                   | Channel Name:       | 210.0nm      |
| Run Time:         | 35.0 Minutes               | Proc. Chnl. Descr.: | PDA 210.0 nm |
| Date Acquired:    | 10/16/2020 10:17:02 PM IST |                     |              |
| Date Processed:   | 10/17/2020 12:07:42 PM IST |                     |              |

Column: ECLIPSE PLUS C-18 250\*4.6mm 5m  
 Mobile phase: A) 5mM NH4OAC in water B) ACN  
 T/%B: 0/5, 20/90,30/90, 31/5, 35/5  
 Flow: 1.0ml/min, Diluent: ACN:H2O (80:20)

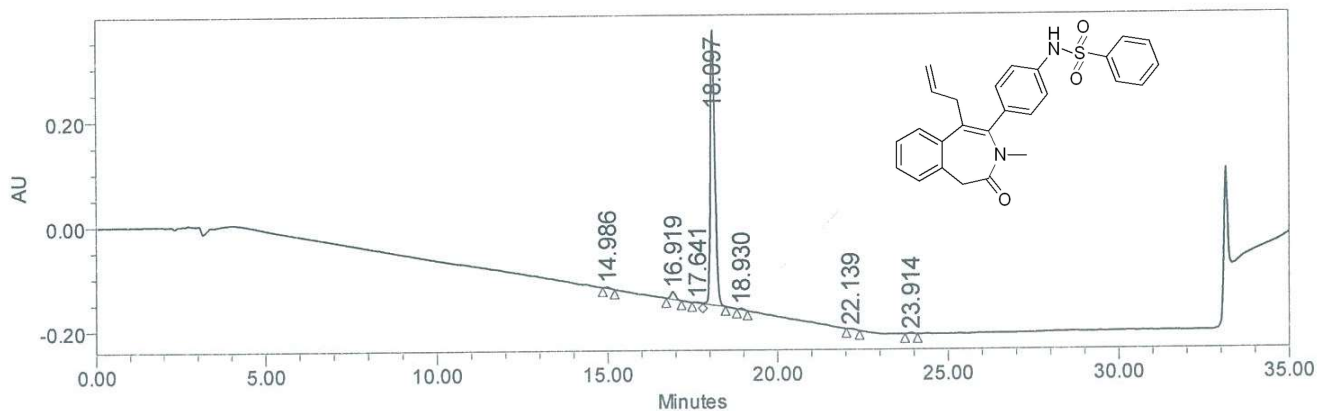

|   | RT     | Height | Area    | % Area |
|---|--------|--------|---------|--------|
| 1 | 14.986 | 2907   | 26823   | 0.52   |
| 2 | 16.919 | 14871  | 140766  | 2.75   |
| 3 | 17.641 | 1277   | 16720   | 0.33   |
| 4 | 18.097 | 522198 | 4884787 | 95.33  |
| 5 | 18.930 | 2601   | 24255   | 0.47   |
| 6 | 22.139 | 1288   | 16137   | 0.31   |
| 7 | 23.914 | 1693   | 14530   | 0.28   |

*Ammy*  
17/10/2020

*ky*  
17/10/2020

## SAMPLE INFORMATION

|                   |                         |                     |                          |
|-------------------|-------------------------|---------------------|--------------------------|
| Sample Name:      | ILS-BTG-TSPA-NM-AL      | Acquired By:        | System                   |
| Sample Type:      | Control                 | Sample Set Name:    | 30092020_02              |
| Vial:             | 1:B,6                   | Acq. Method Set:    | API ABT_M                |
| Injection #:      | 1                       | Processing Method:  | ILS_PRO                  |
| Injection Volume: | 10.00 ul                | Channel Name:       | 210.0nm                  |
| Run Time:         | 35.0 Minutes            | Proc. Chnl. Descr.: | PDA Spectrum PDA210.0 nm |
| Date Acquired:    | 30-09-2020 22:51:11 IST |                     |                          |
| Date Processed:   | 01-10-2020 10:23:33 IST |                     |                          |

Column: Cosmicsil C18 150X4.6mm 5um.  
Mobile Phase: A) 10mM NH4OAC in Water B) ACN  
T%B: 0/5,20/90,30/90,31/5,35/5  
Flow:1.0 ml/min, Diluent:ACN: H2O (80:20)

## Auto-Scaled Chromatogram

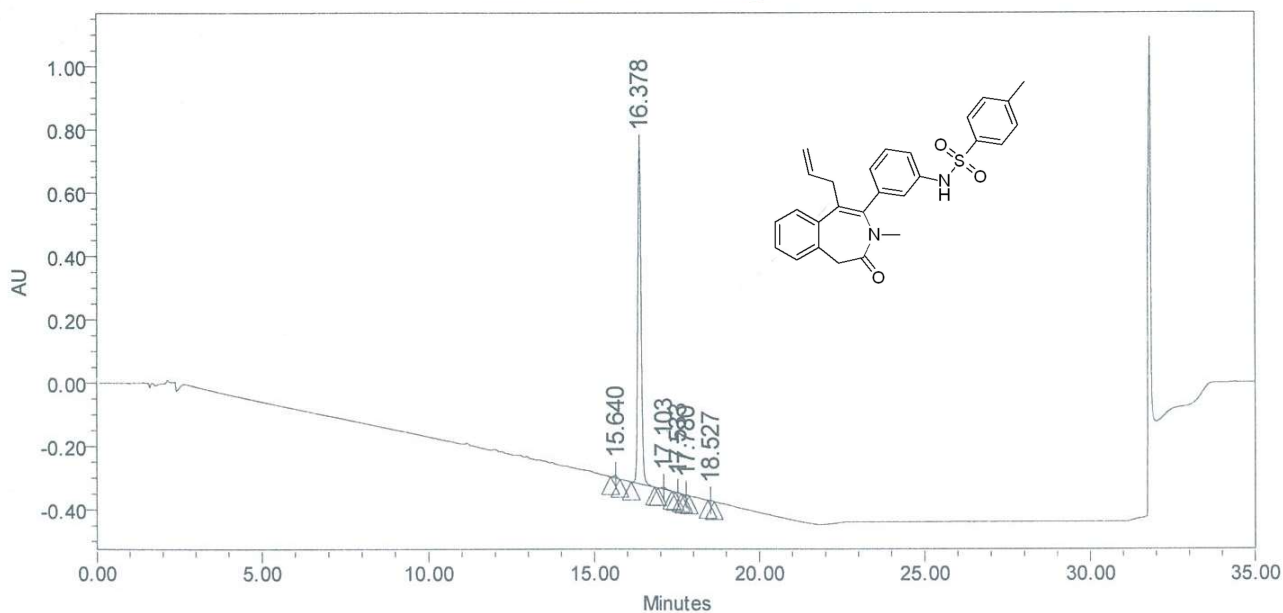

## Peak Results

|   | RT     | Height (μV) | Area    | % Area |
|---|--------|-------------|---------|--------|
| 1 | 15.640 | 8826        | 64657   | 0.84   |
| 2 | 16.378 | 1064013     | 7590223 | 98.09  |
| 3 | 17.103 | 6203        | 59222   | 0.77   |
| 4 | 17.533 | 1654        | 7573    | 0.10   |
| 5 | 17.780 | 1559        | 8733    | 0.11   |
| 6 | 18.527 | 1319        | 7544    | 0.10   |

Reported by User: System  
Report Method: CPRT\_Report2  
Report Method ID: 2994  
Page: 1 of 1

Project Name: 2020\SEP-2020

Date Printed:

01-10-2020

10:43:19 Asia/Kolkata

*Handwritten signature*  
01/10/2020

*Handwritten signature*  
01/10/2020

SAMPLE INFORMATION

|                   |                            |                     |              |
|-------------------|----------------------------|---------------------|--------------|
| Sample Name:      | ILS-BTG-4TSPA-NM-AL        | Acquired By:        | System       |
| A.R.Number:       | CM20J014                   | Sample Set Name:    | 16102020_03  |
| Vial:             | 10                         | Acq. Method Set:    | API ABT_M    |
| Injection #:      | 1                          | Processing Method:  | ILS PRO      |
| Injection Volume: | 10.00 ul                   | Channel Name:       | 210.0nm      |
| Run Time:         | 35.0 Minutes               | Proc. Chnl. Descr.: | PDA 210.0 nm |
| Date Acquired:    | 10/16/2020 9:00:03 PM IST  |                     |              |
| Date Processed:   | 10/17/2020 12:06:18 PM IST |                     |              |

Column: ECLIPSE PLUS C-18 250\*4.6mm 5µm  
 Mobile phase: A) 5mM NH4OAC in water B) ACN  
 T%B: 0/5, 20/90,30/90, 31/5, 35/5  
 Flow: 1.0ml/min, Diluent: ACN:H2O (80:20)

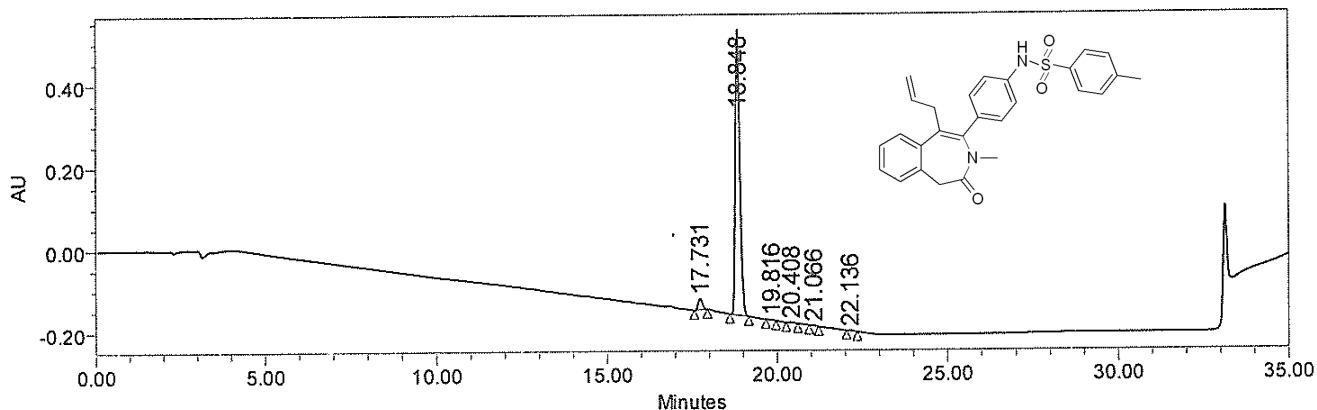

|   | RT     | Height | Area    | % Area |
|---|--------|--------|---------|--------|
| 1 | 17.731 | 27271  | 232991  | 3.49   |
| 2 | 18.848 | 690471 | 6395355 | 95.73  |
| 3 | 19.816 | 1157   | 10386   | 0.16   |
| 4 | 20.408 | 1505   | 15620   | 0.23   |
| 5 | 21.066 | 1179   | 10710   | 0.16   |
| 6 | 22.136 | 1441   | 15885   | 0.24   |

*Signature*  
17/10/2020

*Signature*  
17/10/2020

Injection Date : Wed, 7. Oct. 2020 Seq Line : 6  
 Sample Name : ILS-BTG-TPSPA-AL Location : Vial 24  
 Sample Info : CM20J008 -> Inj. No. : 1  
 Inj. Vol. : 10 µl

Acq. Method : C:\Chem32\1\DATA\2020\OCT-2020\07102020-03-ABT 2020-->  
 Analysis Method : C:\CHEM32\1\METHODS\API ABT\_M.M  
 Last Changed : Thu, 8. Oct. 2020, 10:52:43 am  
 (modified after loading)

Column : Cosmicsil Aura ODS 150\*4.6mm 5µm  
 Mobile phase: A) 10mM NH4OAC in H2O B) ACN  
 T/B% : 0/5,20/90,30/90,31/5,35/5  
 Flow:1.0mL/min ,Diluent: ACN:H2O(80:20)

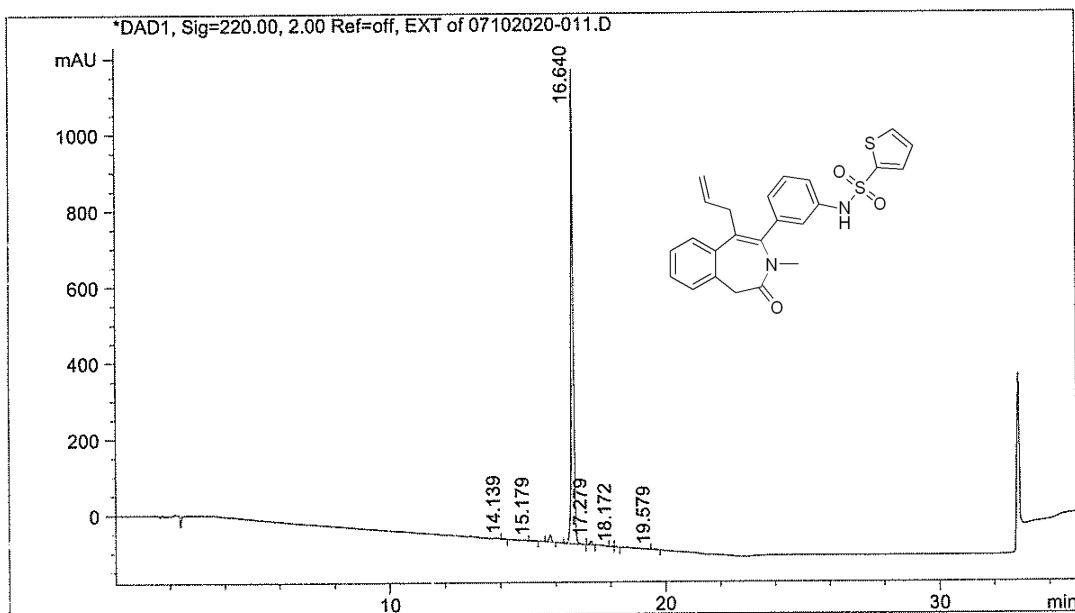

Customized Report: Short

Sorted By Signal

Calib. Data Modified : Thu, 8. Oct. 2020, 10:52:43 am  
 Multiplier : 1.000000  
 Dilution : 1.000000  
 Uncalibrated Peaks : not reported

Signal 1: DAD1, Sig=220.00, 2.00 Ref=off, EXT

| Peak # | RT [min] | Type | Width [min] | Area     | Area % | Name |
|--------|----------|------|-------------|----------|--------|------|
| 1      | 14.139   | MM   | 0.083       | 12.991   | 0.171  |      |
| 2      | 15.179   | MM   | 0.143       | 19.408   | 0.255  |      |
| 3      | 15.795   | MM   | 0.099       | 110.681  | 1.456  |      |
| 4      | 16.640   | MM   | 0.098       | 7367.352 | 96.909 |      |
| 5      | 17.279   | MM   | 0.098       | 54.116   | 0.712  |      |
| 6      | 18.052   | MF   | 0.111       | 13.242   | 0.174  |      |
| 7      | 18.172   | FM   | 0.091       | 8.873    | 0.117  |      |
| 8      | 19.579   | MM   | 0.177       | 15.640   | 0.206  |      |



## SAMPLE INFORMATION

|                   |                         |                     |                           |
|-------------------|-------------------------|---------------------|---------------------------|
| Sample Name:      | ILS/BTG/4TPSPAN/MAL     | Acquired By:        | System                    |
| Sample Type:      | Unknown                 | Sample Set Name:    | 04112020_02               |
| Vial:             | 1:A,8                   | Acq. Method Set:    | API LAR_M                 |
| Injection #:      | 1                       | Processing Method:  | ILS PRO                   |
| Injection Volume: | 5.00 ul                 | Channel Name:       | 210.0nm                   |
| Run Time:         | 35.0 Minutes            | Proc. Chnl. Descr.: | PDA Spectrum PDA 210.0 nm |
| Date Acquired:    | 04-11-2020 19:31:05 IST |                     |                           |
| Date Processed:   | 05-11-2020 10:39:35 IST |                     |                           |

Column: Eclipse PLUS C18 250X4.6mm 5um.  
mobile Phase: A) 0.1% TFA in Water B) ACN  
T%B: 0/5,20/90,28/90,30/5,35/5  
Flow: 1.0 ml/min, Diluent: ACN:H2O(80:20)

## Auto-Scaled Chromatogram

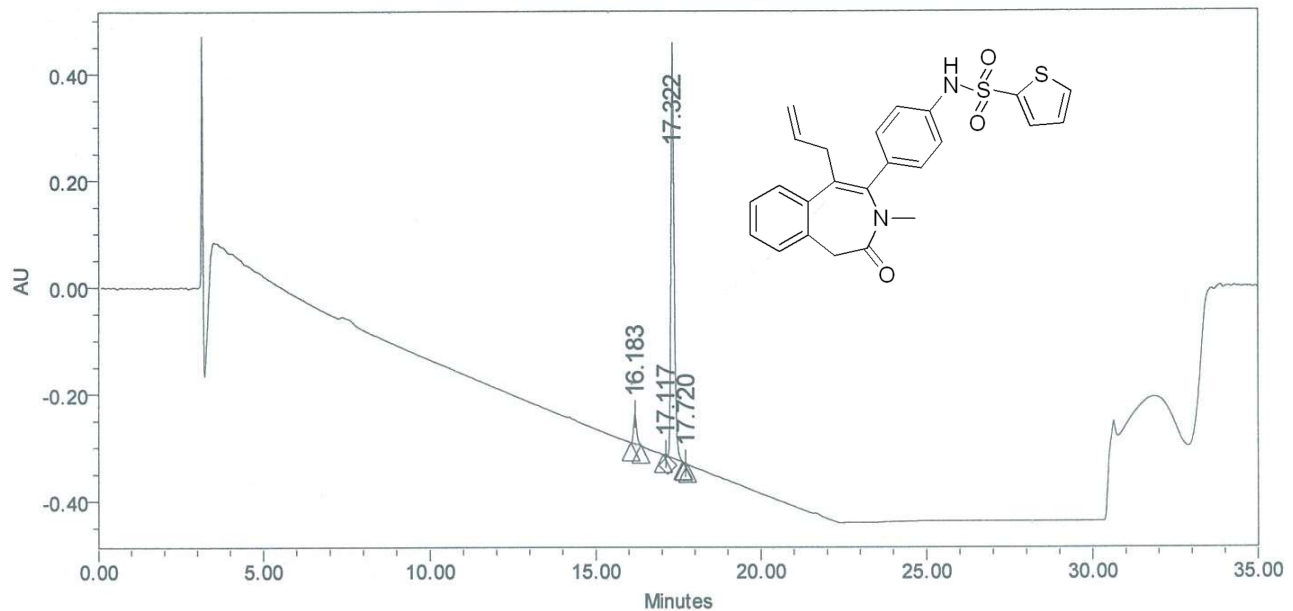

## Peak Results

|   | RT     | Height (μV) | Area    | % Area | Name |
|---|--------|-------------|---------|--------|------|
| 1 | 16.183 | 55231       | 349989  | 6.39   |      |
| 2 | 17.117 | 2952        | 15477   | 0.28   |      |
| 3 | 17.322 | 755174      | 5114055 | 93.31  |      |
| 4 | 17.720 | 352         | 1231    | 0.02   |      |

Reported by User: System  
Report Method: CPRT\_Report2  
Report Method ID: 1304  
Page: 1 of 1

Project Name: 2020/NOV-2020

Date Printed:  
05-11-2020

10:43:03 Asia/Kolkata

*[Handwritten signature]*  
05/11/2020

*[Handwritten signature]*  
05/11/2020

**SAMPLE INFORMATION**

|                   |                            |                     |              |
|-------------------|----------------------------|---------------------|--------------|
| Sample Name:      | ILS-BTG-MTSPA-NM-AL        | Acquired By:        | System       |
| Sample Type:      | Unknow n <i>CA20JOB2</i>   | Sample Set Name:    | 29102020_01  |
| Vial:             | 35                         | Acq. Method Set:    | APIABT_M     |
| Injection #:      | 1                          | Processing Method:  | ILS PROC     |
| Injection Volume: | 10.00 ul                   | Channel Name:       | 210.0nm      |
| Run Time:         | 35.0 Minutes               | Proc. Chnl. Descr.: | PDA 210.0 nm |
| Date Acquired:    | 10/30/2020 12:45:23 AM IST |                     |              |
| Date Processed:   | 10/30/2020 11:33:09 AM IST |                     |              |

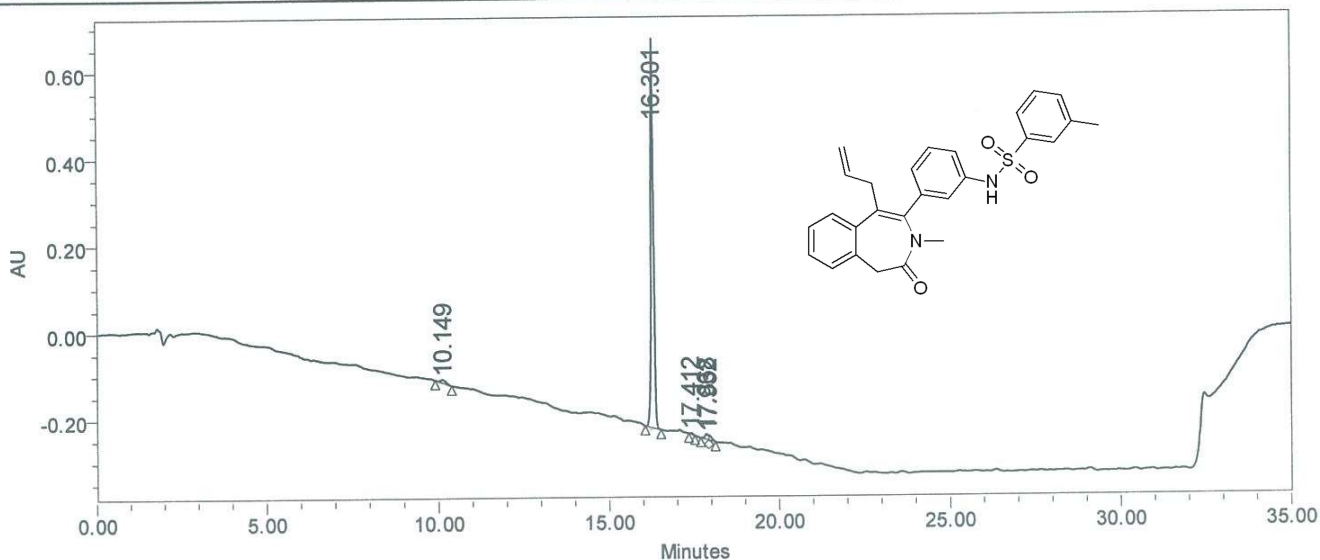

|   | RT     | Height | Area    | % Area |
|---|--------|--------|---------|--------|
| 1 | 10.149 | 7052   | 83077   | 1.60   |
| 2 | 16.301 | 886298 | 4931714 | 95.21  |
| 3 | 17.412 | 2732   | 15627   | 0.30   |
| 4 | 17.868 | 11835  | 85392   | 1.65   |
| 5 | 17.932 | 10290  | 64174   | 1.24   |

method information:

Column:- Eclipse XDB C18 150x4.6mm, 5µm  
 MP:- (A) 10mm NH<sub>4</sub>OAc (B) ACN  
 T/1.B:- 0/5, 20/90, 30/90, 31/5, 35/5  
 flow:- 1.0mL/min Diluent:- ACN:H<sub>2</sub>O(80:20)

*Signature*  
30/10/2020

Rep  
Sokolovsk



SAMPLE INFORMATION

|                   |                           |                     |                |
|-------------------|---------------------------|---------------------|----------------|
| Sample Name:      | ILS-BTG-7-Ph-Pd           | Acquired By:        | System         |
| A.R.Number:       | CM21G010                  | Sample Set Name:    | 21072021_01ILS |
| Vial:             | 23                        | Acq. Method Set:    | API ABT_M      |
| Injection #:      | 1                         | Processing Method:  | ILS PROCE      |
| Injection Volume: | 5.00 ul                   | Channel Name:       | 210.0nm        |
| Run Time:         | 35.0 Minutes              | Proc. Chnl. Descr.: | PDA 210.0 nm   |
| Date Acquired:    | 7/21/2021 10:43:43 AM IST |                     |                |
| Date Processed:   | 7/21/2021 11:41:50 AM IST |                     |                |

Column: Eclipse XDB C-18 150\*4.6mm 5µm  
 Mobile phase: A) 10mM Ammonium Acetate in Water B) ACN  
 T/%B: 0/5,20/90,30/90,31/5,35/5  
 Flow: 1.0ml/min Diluent:ACN:H2O(80:20)

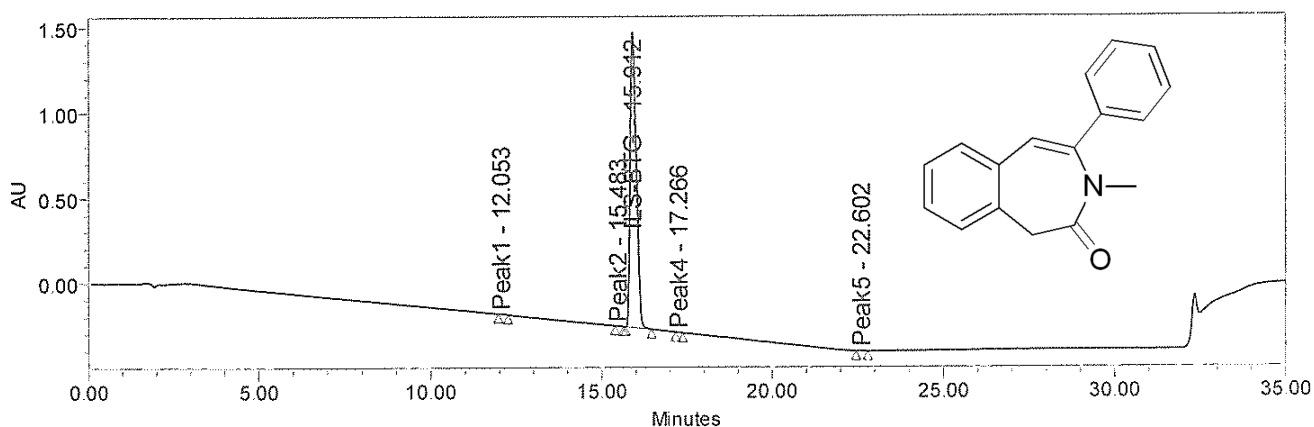

|   | Peak Name | RT     | Height  | Area     | % Area | RT Ratio |
|---|-----------|--------|---------|----------|--------|----------|
| 1 | Peak1     | 12.053 | 1909    | 20559    | 0.09   | 0.76     |
| 2 | Peak2     | 15.483 | 652     | 4866     | 0.02   | 0.97     |
| 3 | ILS-BTG   | 15.912 | 1733116 | 21774207 | 99.82  | 1.00     |
| 4 | Peak4     | 17.266 | 552     | 3628     | 0.02   | 1.09     |
| 5 | Peak5     | 22.602 | 1175    | 9514     | 0.04   | 1.42     |

*[Signature]*  
 21/07/2021

*[Signature]*  
 21/07/21
